# Supplementary material for: An Integrated Linkage Map of Three Recombinant Inbred Populations of Pea (Pisum sativum L.)
Source: Genes (Basel). 2022 Jan 22;13(2):196. doi: 10.3390/genes13020196 (PMC8871737; doi:10.3390/genes13020196)
Supplement: Supplementary file 1 [file genes-13-00196-s001.zip › Tables S1-S4.xlsx]

## Sheet: Table S1. Genotype data 
				RIL id		EKKE-1	EKKE-2	EKKE-3	EKKE-4	EKKE-5	EKKE-6	EKKE-8	EKKE-9	EKKE-10	EKKE-11	EKKE-12	EKKE-14	EKKE-15	EKKE-17	EKKE-18	EKKE-20	EKKE-21	EKKE-22	EKKE-23	EKKE-24	EKKE-25	EKKE-26	EKKE-27	EKKE-28	EKKE-29	EKKE-30	EKKE-31	EKKE-32	EKKE-33	EKKE-34	EKKE-35	EKKE-36	EKKE-37	EKKE-38	EKKE-39	EKKE-40	EKKE-41	EKKE-42	EKKE-43	EKKE-44	EKKE-45	EKKE-47	EKKE-48	EKKE-49
PsCam #	d(cMl)	chromosome	position	lg I		1001	1002	1003	1004	1005	1006	1008	1009	1010	1011	1012	1014	1015	1017	1018	1020	1021	1022	1023	1024	1025	1026	1027	1028	1029	1030	1031	1032	1033	1034	1035	1036	1037	1038	1039	1040	1041	1042	1043	1044	1045	1047	1048	1049
PsCam004787	0	chr2LG1	973750	1		E	E	E	E	K	K	K	E	E	K	E	K	E	K	E	E	K	E	E	K	K	K	E	K	E	K	E	E	K	K	K	E	K	K	K	E	K	E	K	E	K	E	E	K
PsCam036271	0.1206	chr2LG1	1008618	1		E	E	E	E	K	K	K	E	E	K	E	K	E	K	E	E	K	E	E	K	K	K	E	K	E	K	E	E	K	K	K	E	K	K	K	E	K	E	K	E	K	E	E	K
PsCam042410	0.1206	chr2LG1	1188873	1		E	E	E	E	K	K	K	E	E	K	E	K	E	K	E	E	K	E	E	K	K	K	E	K	E	K	E	E	K	K	K	E	K	K	K	E	K	E	K	E	K	E	E	K
PsCam049950	0.1206	chr2LG1	1323744	1		E	E	E	E	K	K	K	E	E	K	E	K	E	K	E	E	K	E	E	K	K	K	E	K	E	K	E	E	K	K	K	E	K	K	K	E	K	E	K	E	K	E	E	K
PsCam036172	0.1206	chr2LG1	1360672	1		-	-	E	E	K	K	K	E	E	K	E	K	E	K	E	E	K	E	E	K	K	K	E	K	E	K	E	E	K	K	K	E	K	K	K	E	K	E	K	E	K	E	E	K
PsCam035314	0.1206	chr2LG1	1373073	1		E	E	E	E	K	K	K	E	E	K	E	K	E	K	E	E	K	E	E	K	K	K	E	K	E	K	E	E	K	K	K	E	K	K	K	E	K	E	K	E	K	E	E	K
PsCam042773	0.1206	chr2LG1	1389667	1		E	E	E	E	K	K	K	E	E	K	E	K	E	K	E	E	K	E	E	K	K	K	E	K	E	K	E	E	K	K	K	E	K	K	K	E	K	E	K	E	K	E	E	K
PsCam053957	0.1206	chr2LG1	1409067	1		E	E	E	E	K	K	K	E	E	K	E	K	E	K	E	E	K	E	E	K	K	K	E	K	E	K	E	E	K	K	K	E	K	K	K	E	K	E	K	E	K	E	E	K
PsCam011281	0.4851	chr2LG1	1442928	1		E	E	E	E	K	K	K	E	E	K	E	K	E	K	K	E	K	E	E	K	K	K	E	K	E	K	E	E	K	K	K	E	K	K	K	E	K	E	K	E	K	E	E	K
PsCam044934	0.4851	chr2LG1	1477840	1		E	E	E	E	K	K	K	E	E	K	E	K	E	K	K	E	K	E	E	K	K	K	E	K	E	K	E	E	K	K	K	E	K	K	K	E	K	E	K	E	K	E	E	K
PsCam018479	1.0972	chr2LG1	2185240	1		E	E	E	E	K	K	K	E	E	K	E	K	E	K	K	E	K	E	E	K	K	K	E	K	E	K	E	E	K	K	K	E	K	K	K	E	K	E	K	E	K	E	E	K
PsCam001276	1.0972	chr2LG1	2208572	1		E	E	E	E	K	K	K	E	E	K	E	K	E	K	K	E	K	E	E	K	K	K	E	K	E	K	E	E	K	K	K	E	K	K	K	E	K	E	K	E	K	E	E	K
PsCam046768	1.3393	chr2LG1	2784081	1		E	K	E	E	K	K	K	E	E	K	E	K	E	K	K	E	K	E	E	K	K	K	E	K	E	K	E	E	K	K	K	E	K	K	K	E	K	E	K	E	K	E	E	K
PsCam049862	1.4599	chr2LG1	2875332	1		E	K	E	E	K	K	K	E	E	K	E	K	E	K	K	E	K	E	E	K	K	K	E	K	E	K	E	E	K	K	K	E	K	K	K	E	K	E	K	E	K	E	E	K
PsCam012665	1.4599	chr2LG1	2894462	1		E	K	E	E	K	K	K	E	E	K	E	K	E	K	K	E	K	E	E	K	K	K	E	K	E	K	E	E	K	K	K	E	K	K	K	E	K	E	K	E	K	E	E	K
PsCam004613	1.4599	chr2LG1	2896805	1		E	K	E	E	K	K	K	E	E	K	E	K	E	K	K	E	K	E	E	K	K	K	E	K	E	K	E	E	K	K	K	E	K	K	K	E	K	E	K	E	K	E	E	K
PsCam014316	1.4599	chr2LG1	2983508	1		E	K	E	E	K	K	K	E	E	K	E	K	E	K	K	E	K	E	E	K	K	K	E	K	E	K	E	E	K	K	K	E	K	K	K	E	K	E	K	E	K	E	E	K
PsCam018405	1.8244	chr2LG1	3569818	1		E	K	E	E	K	K	K	E	E	K	E	K	E	K	K	E	K	E	E	K	K	K	E	K	E	K	E	E	K	K	K	E	K	K	K	E	K	E	K	E	K	E	E	K
PsCam034405	1.8244	chr2LG1	3572672	1		E	K	E	E	K	K	K	E	E	K	E	K	E	K	K	E	K	E	E	K	K	K	E	K	E	K	E	E	K	K	K	E	K	K	K	E	K	E	K	E	K	E	E	K
PsCam012743	1.8244	chr2LG1	3633465	1		E	K	E	E	K	K	K	E	E	K	E	K	E	K	K	E	K	E	E	K	K	K	E	K	E	K	E	E	K	K	K	E	K	K	K	E	K	E	K	E	K	E	E	K
PsCam060155	2.1999	chr2LG1	4652025	1		E	K	E	K	K	K	K	E	E	K	E	K	E	K	K	E	K	E	E	K	K	K	E	K	E	K	E	E	-	-	K	E	K	K	K	E	K	E	K	E	K	E	E	K
PsCam039215	2.3241	chr2LG1	4685463	1		E	K	E	K	K	K	K	E	E	K	E	K	E	K	K	E	K	E	E	K	K	K	E	K	E	K	E	E	K	K	K	E	K	K	K	E	K	E	K	E	K	E	E	K
PsCam025257	2.6886	chr2LG1	4764074	1		E	K	E	K	K	K	K	E	E	K	E	K	E	K	K	E	K	E	E	K	K	K	E	K	E	K	E	E	K	K	K	E	K	K	K	E	K	E	K	E	K	E	E	K
PsCam026960	2.9356	chr2LG1	4861143	1		E	K	E	K	K	K	K	E	E	K	E	K	E	K	K	E	K	E	E	K	K	K	E	K	E	K	E	E	K	K	K	E	K	K	K	E	K	E	K	E	K	E	E	K
PsCam049560	2.9356	chr2LG1	4864121	1		E	K	E	K	K	K	K	E	E	K	E	K	E	K	K	E	K	E	E	K	K	K	E	K	E	K	E	E	K	K	K	E	K	K	K	E	K	E	K	E	K	E	E	K
PsCam060089	2.9356	chr2LG1	4962078	1		E	K	E	K	K	K	K	E	E	K	E	K	E	K	K	E	K	E	E	K	K	K	E	K	E	K	E	E	K	K	K	E	K	K	K	E	K	E	K	E	K	E	E	K
PsCam014211	2.9356	chr2LG1	5095576	1		E	K	E	K	K	K	K	E	E	K	E	K	E	K	K	E	K	E	E	K	K	K	E	K	E	K	E	E	K	K	K	E	K	K	K	E	K	E	K	E	K	E	E	K
PsCam042135	2.9356	chr2LG1	5182815	1		-	-	-	-	-	-	-	-	-	-	-	-	-	-	-	-	-	-	-	-	-	-	-	-	-	-	-	-	-	-	-	-	-	-	-	-	-	-	-	-	-	-	-	-
PsCam035677	3.414	chr2LG1	5229215	1		E	K	E	K	K	K	K	E	E	K	E	K	E	K	K	E	K	E	E	K	K	K	E	K	E	K	E	E	K	K	K	E	K	K	K	E	K	E	K	E	K	E	E	K
PsCam025211	3.414	chr2LG1	5230947	1		E	K	E	K	K	K	K	E	E	K	E	K	E	K	K	E	K	E	E	K	K	K	E	K	E	K	E	E	K	K	K	E	K	K	K	E	K	E	K	E	K	E	E	K
PsCam034741	3.414	chr2LG1	5245974	1		-	-	-	-	-	-	-	-	-	-	-	-	-	-	-	-	-	-	-	-	-	-	-	-	-	-	-	-	-	-	-	-	-	-	-	-	-	-	-	-	-	-	-	-
PsCam007118	3.6516	chr2LG1	5578228	1		-	-	-	-	-	-	-	-	-	-	-	-	-	-	-	-	-	-	-	-	-	-	-	-	-	-	-	-	-	-	-	-	-	-	-	-	-	-	-	-	-	-	-	-
PsCam037914	4.13	chr2LG1	5720552	1		E	K	E	K	K	K	K	E	E	K	E	K	E	K	K	E	K	E	E	K	K	K	E	K	E	K	E	E	K	K	K	E	K	K	K	E	K	E	K	E	K	E	E	K
PsCam017761	4.3676	chr2LG1	6230212	1		-	-	-	-	-	-	-	-	-	-	-	-	-	-	-	-	-	-	-	-	-	-	-	-	-	-	-	-	-	-	-	-	-	-	-	-	-	-	-	-	-	-	-	-
PsCam051189	4.3676	chr2LG1	6340871	1		E	K	E	K	K	K	K	E	E	K	E	K	E	K	K	E	K	E	E	K	K	K	E	K	E	K	E	E	K	K	K	E	K	K	K	E	K	E	K	E	K	E	E	K
PsCam046026	4.3676	chr2LG1	6546056	1		-	-	-	-	-	-	-	-	-	-	-	-	-	-	-	-	-	-	-	-	-	-	-	-	-	-	-	-	-	-	-	-	-	-	-	-	-	-	-	-	-	-	-	-
PsCam057527	4.3676	chr2LG1	6673001	1		E	K	E	K	K	K	K	E	E	K	E	K	E	K	K	E	K	E	E	K	K	K	E	K	E	K	E	E	K	K	K	E	K	K	K	E	K	E	K	E	K	E	E	K
PsCam010400	4.3676	chr2LG1	6683765	1		-	-	-	-	-	-	-	-	-	-	-	-	-	-	-	-	-	-	-	-	-	-	-	-	-	-	-	-	-	-	-	-	-	-	-	-	-	-	-	-	-	-	-	-
PsCam011749	4.3676	chr2LG1	6684705	1		E	K	E	K	K	K	K	E	E	K	E	K	E	K	K	E	K	E	E	K	K	K	E	K	E	K	E	E	K	K	K	E	K	K	K	E	K	E	K	E	K	E	E	K
PsCam049554	4.3676	chr2LG1	6774172	1		E	K	E	K	K	K	K	E	E	K	E	K	E	K	K	E	K	E	E	K	K	K	E	K	E	K	E	E	K	K	K	E	K	K	K	E	K	E	K	E	K	E	E	K
PsCam018519	4.3676	chr2LG1	6786130	1		-	-	-	-	-	-	-	-	-	-	-	-	-	-	-	-	-	-	-	-	-	-	-	-	-	-	-	-	-	-	-	-	-	-	-	-	-	-	-	-	-	-	-	-
PsCam047148	4.6062	chr2LG1	6935283	1		E	K	E	K	K	K	K	E	E	K	E	K	E	K	K	E	K	E	E	K	K	K	E	K	E	K	E	E	K	K	K	E	K	K	K	E	K	E	K	E	K	E	E	K
PsCam000586	4.8449	chr2LG1	7367351	1		-	-	-	-	-	-	-	-	-	-	-	-	-	-	-	-	-	-	-	-	-	-	-	-	-	-	-	-	-	-	-	-	-	-	-	-	-	-	-	-	-	-	-	-
PsCam008138	4.8449	chr2LG1	7371144	1		-	-	-	-	-	-	-	-	-	-	-	-	-	-	-	-	-	-	-	-	-	-	-	-	-	-	-	-	-	-	-	-	-	-	-	-	-	-	-	-	-	-	-	-
PsCam005641	4.8449	chr2LG1	7759483	1		E	K	E	K	K	K	K	E	E	K	E	K	E	K	K	E	K	E	E	K	K	K	E	K	E	K	E	E	K	K	K	E	K	K	K	E	K	E	K	E	K	E	E	K
PsCam044411	4.8449	chr2LG1	7762135	1		-	-	-	-	-	-	-	-	-	-	-	-	-	-	-	-	-	-	-	-	-	-	-	-	-	-	-	-	-	-	-	-	-	-	-	-	-	-	-	-	-	-	-	-
PsCam049965	4.8449	chr2LG1	7765358	1		-	-	-	-	-	-	-	-	-	-	-	-	-	-	-	-	-	-	-	-	-	-	-	-	-	-	-	-	-	-	-	-	-	-	-	-	-	-	-	-	-	-	-	-
PsCam049506	4.8449	chr2LG1	8027360	1		-	-	-	-	-	-	-	-	-	-	-	-	-	-	-	-	-	-	-	-	-	-	-	-	-	-	-	-	-	-	-	-	-	-	-	-	-	-	-	-	-	-	-	-
PsCam034278	4.8449	chr2LG1	7933049	1		-	-	-	-	-	-	-	-	-	-	-	-	-	-	-	-	-	-	-	-	-	-	-	-	-	-	-	-	-	-	-	-	-	-	-	-	-	-	-	-	-	-	-	-
PsCam042658	4.8449	chr2LG1	7872277	1		-	-	-	-	-	-	-	-	-	-	-	-	-	-	-	-	-	-	-	-	-	-	-	-	-	-	-	-	-	-	-	-	-	-	-	-	-	-	-	-	-	-	-	-
PsCam012257	4.8449	chr2LG1	7872246	1		-	-	-	-	-	-	-	-	-	-	-	-	-	-	-	-	-	-	-	-	-	-	-	-	-	-	-	-	-	-	-	-	-	-	-	-	-	-	-	-	-	-	-	-
PsCam036697	5.2139	chr2LG1	7844424	1		-	-	-	-	-	-	-	-	-	-	-	-	-	-	-	-	-	-	-	-	-	-	-	-	-	-	-	-	-	-	-	-	-	-	-	-	-	-	-	-	-	-	-	-
PsCam027060	5.3363	chr2LG1	8280328	1		-	-	-	-	-	-	-	-	-	-	-	-	-	-	-	-	-	-	-	-	-	-	-	-	-	-	-	-	-	-	-	-	-	-	-	-	-	-	-	-	-	-	-	-
PsCam000188	5.7062	chr2LG1	8099372	1		-	-	-	-	-	-	-	-	-	-	-	-	-	-	-	-	-	-	-	-	-	-	-	-	-	-	-	-	-	-	-	-	-	-	-	-	-	-	-	-	-	-	-	-
PsCam000193	5.7062	chr2LG1	8444763	1		-	-	-	-	-	-	-	-	-	-	-	-	-	-	-	-	-	-	-	-	-	-	-	-	-	-	-	-	-	-	-	-	-	-	-	-	-	-	-	-	-	-	-	-
PsCam042261	5.9519	chr2LG1	8506247	1		-	-	-	-	-	-	-	-	-	-	-	-	-	-	-	-	-	-	-	-	-	-	-	-	-	-	-	-	-	-	-	-	-	-	-	-	-	-	-	-	-	-	-	-
PsCam027536	6.3218	chr2LG1	9048145	1		-	-	-	-	-	-	-	-	-	-	-	-	-	-	-	-	-	-	-	-	-	-	-	-	-	-	-	-	-	-	-	-	-	-	-	-	-	-	-	-	-	-	-	-
PsCam017611	6.3218	chr2LG1	9082046	1		-	-	-	-	-	-	-	-	-	-	-	-	-	-	-	-	-	-	-	-	-	-	-	-	-	-	-	-	-	-	-	-	-	-	-	-	-	-	-	-	-	-	-	-
PsCam038419	6.3218	chr2LG1	8949116	1		-	-	-	-	-	-	-	-	-	-	-	-	-	-	-	-	-	-	-	-	-	-	-	-	-	-	-	-	-	-	-	-	-	-	-	-	-	-	-	-	-	-	-	-
PsCam043029	6.3218	chr2LG1	8791475	1		-	-	-	-	-	-	-	-	-	-	-	-	-	-	-	-	-	-	-	-	-	-	-	-	-	-	-	-	-	-	-	-	-	-	-	-	-	-	-	-	-	-	-	-
PsCam004721	6.3218	chr2LG1	8769969	1		-	-	-	-	-	-	-	-	-	-	-	-	-	-	-	-	-	-	-	-	-	-	-	-	-	-	-	-	-	-	-	-	-	-	-	-	-	-	-	-	-	-	-	-
PsCam057704	6.3218	chr2LG1	8678412	1		-	-	-	-	-	-	-	-	-	-	-	-	-	-	-	-	-	-	-	-	-	-	-	-	-	-	-	-	-	-	-	-	-	-	-	-	-	-	-	-	-	-	-	-
PsCam034702	6.4439	chr2LG1	9159678	1		-	-	-	-	-	-	-	-	-	-	-	-	-	-	-	-	-	-	-	-	-	-	-	-	-	-	-	-	-	-	-	-	-	-	-	-	-	-	-	-	-	-	-	-
PsCam045490	6.4439	chr2LG1	9163972	1		-	-	-	-	-	-	-	-	-	-	-	-	-	-	-	-	-	-	-	-	-	-	-	-	-	-	-	-	-	-	-	-	-	-	-	-	-	-	-	-	-	-	-	-
PsCam045085	6.6815	chr2LG1	9341206	1		-	-	-	-	-	-	-	-	-	-	-	-	-	-	-	-	-	-	-	-	-	-	-	-	-	-	-	-	-	-	-	-	-	-	-	-	-	-	-	-	-	-	-	-
PsCam038836	6.6815	chr2LG1	9497807	1		-	-	-	-	-	-	-	-	-	-	-	-	-	-	-	-	-	-	-	-	-	-	-	-	-	-	-	-	-	-	-	-	-	-	-	-	-	-	-	-	-	-	-	-
PsCam059764	6.6815	chr2LG1	9531728	1		-	-	-	-	-	-	-	-	-	-	-	-	-	-	-	-	-	-	-	-	-	-	-	-	-	-	-	-	-	-	-	-	-	-	-	-	-	-	-	-	-	-	-	-
PsCam026834	7.0588	chr2LG1	9891757	1		-	-	-	-	-	-	-	-	-	-	-	-	-	-	-	-	-	-	-	-	-	-	-	-	-	-	-	-	-	-	-	-	-	-	-	-	-	-	-	-	-	-	-	-
PsCam036048	7.3039	chr2LG1	9676867	1		-	-	-	-	-	-	-	-	-	-	-	-	-	-	-	-	-	-	-	-	-	-	-	-	-	-	-	-	-	-	-	-	-	-	-	-	-	-	-	-	-	-	-	-
PsCam054792	7.426	chr2LG1	9648444	1		-	-	-	-	-	-	-	-	-	-	-	-	-	-	-	-	-	-	-	-	-	-	-	-	-	-	-	-	-	-	-	-	-	-	-	-	-	-	-	-	-	-	-	-
PsCam007215	7.5481	chr2LG1	9603421	1		-	-	-	-	-	-	-	-	-	-	-	-	-	-	-	-	-	-	-	-	-	-	-	-	-	-	-	-	-	-	-	-	-	-	-	-	-	-	-	-	-	-	-	-
PsCam052379	7.5481	chr2LG1	10157957	1		-	-	-	-	-	-	-	-	-	-	-	-	-	-	-	-	-	-	-	-	-	-	-	-	-	-	-	-	-	-	-	-	-	-	-	-	-	-	-	-	-	-	-	-
PsCam051691	7.5481	chr2LG1	10409620	1		-	-	-	-	-	-	-	-	-	-	-	-	-	-	-	-	-	-	-	-	-	-	-	-	-	-	-	-	-	-	-	-	-	-	-	-	-	-	-	-	-	-	-	-
PsCam000674	7.6702	chr2LG1	10391302	1		-	-	-	-	-	-	-	-	-	-	-	-	-	-	-	-	-	-	-	-	-	-	-	-	-	-	-	-	-	-	-	-	-	-	-	-	-	-	-	-	-	-	-	-
PsCam005317	7.6702	chr2LG1	10369674	1		-	-	-	-	-	-	-	-	-	-	-	-	-	-	-	-	-	-	-	-	-	-	-	-	-	-	-	-	-	-	-	-	-	-	-	-	-	-	-	-	-	-	-	-
PsCam044106	7.6702	chr2LG1	12700693	1		-	-	-	-	-	-	-	-	-	-	-	-	-	-	-	-	-	-	-	-	-	-	-	-	-	-	-	-	-	-	-	-	-	-	-	-	-	-	-	-	-	-	-	-
PsCam036795	7.6702	chr2LG1	12622996	1		-	-	-	-	-	-	-	-	-	-	-	-	-	-	-	-	-	-	-	-	-	-	-	-	-	-	-	-	-	-	-	-	-	-	-	-	-	-	-	-	-	-	-	-
PsCam046150	7.9306	chr2LG1	11639972	1		-	-	-	-	-	-	-	-	-	-	-	-	-	-	-	-	-	-	-	-	-	-	-	-	-	-	-	-	-	-	-	-	-	-	-	-	-	-	-	-	-	-	-	-
PsCam046085	7.9306	chr2LG1	12490329	1		-	-	-	-	-	-	-	-	-	-	-	-	-	-	-	-	-	-	-	-	-	-	-	-	-	-	-	-	-	-	-	-	-	-	-	-	-	-	-	-	-	-	-	-
PsCam038464	8.9111	chr2LG1	11843529	1		-	-	-	-	-	-	-	-	-	-	-	-	-	-	-	-	-	-	-	-	-	-	-	-	-	-	-	-	-	-	-	-	-	-	-	-	-	-	-	-	-	-	-	-
PsCam004641	9.1497	chr2LG1	11868425	1		E	K	E	K	K	K	K	E	E	K	E	K	E	K	K	E	K	E	E	K	K	K	E	K	E	K	E	K	K	K	K	E	K	K	K	E	K	E	K	E	K	E	E	E
PsCam013008	9.8726	chr2LG1	12074854	1		-	-	-	-	-	-	-	-	-	-	-	-	-	-	-	-	-	-	-	-	-	-	-	-	-	-	-	-	-	-	-	-	-	-	-	-	-	-	-	-	-	-	-	-
PsCam037924	9.8726	chr2LG1	12168284	1		-	-	-	-	-	-	-	-	-	-	-	-	-	-	-	-	-	-	-	-	-	-	-	-	-	-	-	-	-	-	-	-	-	-	-	-	-	-	-	-	-	-	-	-
PsCam016796	9.8726	chr2LG1	12177039	1		E	K	E	K	K	K	K	E	E	K	E	K	E	K	K	E	K	E	E	K	K	K	E	K	E	K	E	K	K	K	K	E	K	K	K	E	K	E	K	E	K	E	E	E
PsCam044561	10.1195	chr2LG1	12315537	1		E	K	E	K	K	K	K	E	E	K	K	K	E	K	K	E	K	E	E	K	K	K	E	K	E	K	E	K	K	K	K	E	K	K	K	E	K	E	K	E	K	E	E	E
PsCam006846	10.1195	chr2LG1	12372006	1		E	K	E	K	K	K	K	E	E	K	K	K	E	K	K	E	K	E	E	K	K	K	E	K	E	K	E	K	K	K	K	E	K	K	K	E	K	E	K	E	K	E	E	E
PsCam027787	10.3665	chr2LG1	12773456	1		E	K	E	K	K	K	K	E	E	K	K	K	E	K	K	E	K	E	E	K	K	K	E	K	E	K	E	K	K	K	K	E	K	K	K	E	K	E	K	E	K	E	E	E
PsCam001740	10.3665	chr2LG1	13122907	1		E	K	E	K	K	K	K	E	E	K	K	K	E	K	K	E	K	E	E	K	K	K	E	K	E	K	E	K	K	K	K	E	K	K	K	E	K	E	K	E	K	E	E	E
PsCam039420	10.3665	chr2LG1	13193958	1		-	-	-	-	-	-	-	-	-	-	-	-	-	-	-	-	-	-	-	-	-	-	-	-	-	-	-	-	-	-	-	-	-	-	-	-	-	-	-	-	-	-	-	-
PsCam034638	10.3665	chr2LG1	13530091	1		E	K	E	K	E	K	K	E	E	K	K	K	E	K	K	E	K	E	E	K	K	K	E	K	E	K	E	K	K	K	K	E	K	K	K	E	K	E	K	E	K	E	E	E
PsCam030771	10.4871	chr2LG1	13599748	1		E	K	E	K	E	K	K	E	E	K	K	K	E	K	K	E	K	E	E	K	K	K	E	K	E	K	E	K	K	K	K	E	K	K	K	E	K	E	K	E	K	E	E	E
PsCam050321	10.4871	chr2LG1	14726516	1		E	K	E	K	E	K	K	E	E	K	K	K	E	K	K	E	K	E	E	K	K	K	E	K	E	K	E	K	K	K	K	E	K	K	K	E	K	E	K	E	K	E	E	E
PsCam055999	10.4871	chr2LG1	14838606	1		E	K	E	K	E	K	K	E	E	K	K	K	E	K	K	E	K	E	E	K	K	K	E	K	E	K	E	K	K	K	K	E	K	K	K	E	K	E	K	E	K	E	E	E
PsCam039413	10.6116	chr2LG1	15003653	1		E	K	E	K	E	K	K	E	E	K	K	K	E	K	K	E	K	E	E	K	K	K	E	K	E	K	E	K	K	K	K	E	K	K	K	E	K	E	K	E	K	E	E	E
PsCam044143	10.6116	chr2LG1	14937233	1		E	K	E	K	E	K	K	E	E	K	K	K	E	K	K	E	K	E	E	K	K	K	E	K	E	K	E	K	K	K	K	E	K	K	K	E	K	E	K	E	K	E	E	E
PsCam012955	10.6116	chr2LG1	14940515	1		E	K	E	K	E	K	K	E	E	K	K	K	E	K	K	E	K	E	E	K	K	K	E	K	E	K	E	K	K	K	K	E	K	K	K	E	K	E	K	E	K	E	E	E
PsCam012608	10.6116	chr2LG1	14950623	1		E	K	E	K	E	K	K	E	E	K	K	K	E	K	K	E	K	E	E	K	K	K	E	K	E	K	E	K	K	K	K	E	K	K	K	E	K	E	K	E	K	E	E	E
PsCam013026	10.6116	chr2LG1	14953361	1		E	K	E	K	E	K	K	E	E	K	K	K	E	K	K	E	K	E	E	K	K	K	E	K	E	K	E	K	K	K	K	E	K	K	K	E	K	E	K	E	K	E	E	E
PsCam037667	10.6116	chr2LG1	15525207	1		-	-	-	-	-	-	-	-	-	-	-	-	-	-	-	-	-	-	-	-	-	-	-	-	-	-	-	-	-	-	-	-	-	-	-	-	-	-	-	-	-	-	-	-
PsCam000976	10.6116	chr2LG1	15509647	1		E	K	E	K	E	K	K	E	E	K	K	K	E	K	K	E	K	E	E	K	K	K	E	K	E	K	E	K	K	K	K	E	K	K	K	E	K	E	K	E	K	E	E	E
PsCam043759	11.1244	chr2LG1	16458633	1		-	-	-	-	-	-	-	-	-	-	-	-	-	-	-	-	-	-	-	-	-	-	-	-	-	-	-	-	-	-	-	-	-	-	-	-	-	-	-	-	-	-	-	-
PsCam045731	11.2465	chr2LG1	16916721	1		-	-	-	-	-	-	-	-	-	-	-	-	-	-	-	-	-	-	-	-	-	-	-	-	-	-	-	-	-	-	-	-	-	-	-	-	-	-	-	-	-	-	-	-
PsCam001167	11.2465	chr2LG1	16920334	1		-	-	-	-	-	-	-	-	-	-	-	-	-	-	-	-	-	-	-	-	-	-	-	-	-	-	-	-	-	-	-	-	-	-	-	-	-	-	-	-	-	-	-	-
PsCam037915	11.8661	chr2LG1	16974889	1		-	-	-	-	-	-	-	-	-	-	-	-	-	-	-	-	-	-	-	-	-	-	-	-	-	-	-	-	-	-	-	-	-	-	-	-	-	-	-	-	-	-	-	-
PsCam039402	12.36	chr2LG1	18370985	1		-	-	-	-	-	-	-	-	-	-	-	-	-	-	-	-	-	-	-	-	-	-	-	-	-	-	-	-	-	-	-	-	-	-	-	-	-	-	-	-	-	-	-	-
PsCam059109	12.36	chr2LG1	18372169	1		-	-	-	-	-	-	-	-	-	-	-	-	-	-	-	-	-	-	-	-	-	-	-	-	-	-	-	-	-	-	-	-	-	-	-	-	-	-	-	-	-	-	-	-
PsCam050156	12.4821	chr2LG1	18554199	1		-	-	-	-	-	-	-	-	-	-	-	-	-	-	-	-	-	-	-	-	-	-	-	-	-	-	-	-	-	-	-	-	-	-	-	-	-	-	-	-	-	-	-	-
PsCam034033	12.4821	chr2LG1	17919689	1		-	-	-	-	-	-	-	-	-	-	-	-	-	-	-	-	-	-	-	-	-	-	-	-	-	-	-	-	-	-	-	-	-	-	-	-	-	-	-	-	-	-	-	-
PsCam045937	12.4821	chr2LG1	17958007	1		-	-	-	-	-	-	-	-	-	-	-	-	-	-	-	-	-	-	-	-	-	-	-	-	-	-	-	-	-	-	-	-	-	-	-	-	-	-	-	-	-	-	-	-
PsCam035883	12.4821	chr2LG1	19389881	1		-	-	-	-	-	-	-	-	-	-	-	-	-	-	-	-	-	-	-	-	-	-	-	-	-	-	-	-	-	-	-	-	-	-	-	-	-	-	-	-	-	-	-	-
PsCam004901	12.4821	chr2LG1	19525706	1		-	-	-	-	-	-	-	-	-	-	-	-	-	-	-	-	-	-	-	-	-	-	-	-	-	-	-	-	-	-	-	-	-	-	-	-	-	-	-	-	-	-	-	-
PsCam037525	12.4821	chr2LG1	19045420	1		-	-	-	-	-	-	-	-	-	-	-	-	-	-	-	-	-	-	-	-	-	-	-	-	-	-	-	-	-	-	-	-	-	-	-	-	-	-	-	-	-	-	-	-
PsCam057653	12.4821	chr2LG1	19111059	1		-	-	-	-	-	-	-	-	-	-	-	-	-	-	-	-	-	-	-	-	-	-	-	-	-	-	-	-	-	-	-	-	-	-	-	-	-	-	-	-	-	-	-	-
PsCam052147	12.4821	chr2LG1	19114623	1		-	-	-	-	-	-	-	-	-	-	-	-	-	-	-	-	-	-	-	-	-	-	-	-	-	-	-	-	-	-	-	-	-	-	-	-	-	-	-	-	-	-	-	-
PsCam059552	14.0128	chr2LG1	21030409	1		-	-	-	-	-	-	-	-	-	-	-	-	-	-	-	-	-	-	-	-	-	-	-	-	-	-	-	-	-	-	-	-	-	-	-	-	-	-	-	-	-	-	-	-
PsCam055095	14.1349	super-scaffold3759	94838	1		-	-	-	-	-	-	-	-	-	-	-	-	-	-	-	-	-	-	-	-	-	-	-	-	-	-	-	-	-	-	-	-	-	-	-	-	-	-	-	-	-	-	-	-
PsCam045511	14.5039	chr2LG1	21350228	1		-	-	-	-	-	-	-	-	-	-	-	-	-	-	-	-	-	-	-	-	-	-	-	-	-	-	-	-	-	-	-	-	-	-	-	-	-	-	-	-	-	-	-	-
PsCam007072	14.5039	chr2LG1	21369383	1		-	-	-	-	-	-	-	-	-	-	-	-	-	-	-	-	-	-	-	-	-	-	-	-	-	-	-	-	-	-	-	-	-	-	-	-	-	-	-	-	-	-	-	-
PsCam014063	14.5039	chr2LG1	21378302	1		-	-	-	-	-	-	-	-	-	-	-	-	-	-	-	-	-	-	-	-	-	-	-	-	-	-	-	-	-	-	-	-	-	-	-	-	-	-	-	-	-	-	-	-
PsCam042896	14.5039	chr2LG1	21468499	1		-	-	-	-	-	-	-	-	-	-	-	-	-	-	-	-	-	-	-	-	-	-	-	-	-	-	-	-	-	-	-	-	-	-	-	-	-	-	-	-	-	-	-	-
PsCam054965	14.5039	chr2LG1	21853208	1		-	-	-	-	-	-	-	-	-	-	-	-	-	-	-	-	-	-	-	-	-	-	-	-	-	-	-	-	-	-	-	-	-	-	-	-	-	-	-	-	-	-	-	-
PsCam035688	14.626	scaffold01289	57846	1		-	-	-	-	-	-	-	-	-	-	-	-	-	-	-	-	-	-	-	-	-	-	-	-	-	-	-	-	-	-	-	-	-	-	-	-	-	-	-	-	-	-	-	-
PsCam038007	14.626	scaffold01289	61145	1		-	-	-	-	-	-	-	-	-	-	-	-	-	-	-	-	-	-	-	-	-	-	-	-	-	-	-	-	-	-	-	-	-	-	-	-	-	-	-	-	-	-	-	-
PsCam049614	15.3723	scaffold00680	73454	1		-	-	-	-	-	-	-	-	-	-	-	-	-	-	-	-	-	-	-	-	-	-	-	-	-	-	-	-	-	-	-	-	-	-	-	-	-	-	-	-	-	-	-	-
PsCam038961	15.3723	scaffold03383	117163	1		-	-	-	-	-	-	-	-	-	-	-	-	-	-	-	-	-	-	-	-	-	-	-	-	-	-	-	-	-	-	-	-	-	-	-	-	-	-	-	-	-	-	-	-
PsCam043118	15.3723	scaffold02703	136647	1		-	-	-	-	-	-	-	-	-	-	-	-	-	-	-	-	-	-	-	-	-	-	-	-	-	-	-	-	-	-	-	-	-	-	-	-	-	-	-	-	-	-	-	-
PsCam003050	15.3723	scaffold02829	68114	1		-	-	-	-	-	-	-	-	-	-	-	-	-	-	-	-	-	-	-	-	-	-	-	-	-	-	-	-	-	-	-	-	-	-	-	-	-	-	-	-	-	-	-	-
PsCam049770	15.8673	chr2LG1	21952360	1		-	-	-	-	-	-	-	-	-	-	-	-	-	-	-	-	-	-	-	-	-	-	-	-	-	-	-	-	-	-	-	-	-	-	-	-	-	-	-	-	-	-	-	-
PsCam049171	16.1124	chr2LG1	23124088	1		-	-	-	-	-	-	-	-	-	-	-	-	-	-	-	-	-	-	-	-	-	-	-	-	-	-	-	-	-	-	-	-	-	-	-	-	-	-	-	-	-	-	-	-
PsCam052302	16.1124	chr2LG1	24430818	1		-	-	-	-	-	-	-	-	-	-	-	-	-	-	-	-	-	-	-	-	-	-	-	-	-	-	-	-	-	-	-	-	-	-	-	-	-	-	-	-	-	-	-	-
PsCam049046	16.2345	chr2LG1	24461998	1		-	-	-	-	-	-	-	-	-	-	-	-	-	-	-	-	-	-	-	-	-	-	-	-	-	-	-	-	-	-	-	-	-	-	-	-	-	-	-	-	-	-	-	-
PsCam051746	16.2345	chr2LG1	23689753	1		-	-	-	-	-	-	-	-	-	-	-	-	-	-	-	-	-	-	-	-	-	-	-	-	-	-	-	-	-	-	-	-	-	-	-	-	-	-	-	-	-	-	-	-
PsCam040352	16.2345	chr2LG1	23726225	1		-	-	-	-	-	-	-	-	-	-	-	-	-	-	-	-	-	-	-	-	-	-	-	-	-	-	-	-	-	-	-	-	-	-	-	-	-	-	-	-	-	-	-	-
PsCam046618	16.2345	chr2LG1	23749982	1		-	-	-	-	-	-	-	-	-	-	-	-	-	-	-	-	-	-	-	-	-	-	-	-	-	-	-	-	-	-	-	-	-	-	-	-	-	-	-	-	-	-	-	-
PsCam029639	16.3566	chr2LG1	23985527	1		-	-	-	-	-	-	-	-	-	-	-	-	-	-	-	-	-	-	-	-	-	-	-	-	-	-	-	-	-	-	-	-	-	-	-	-	-	-	-	-	-	-	-	-
PsCam033717	16.3566	chr2LG1	24131275	1		-	-	-	-	-	-	-	-	-	-	-	-	-	-	-	-	-	-	-	-	-	-	-	-	-	-	-	-	-	-	-	-	-	-	-	-	-	-	-	-	-	-	-	-
PsCam050704	16.3566	chr2LG1	24597743	1		-	-	-	-	-	-	-	-	-	-	-	-	-	-	-	-	-	-	-	-	-	-	-	-	-	-	-	-	-	-	-	-	-	-	-	-	-	-	-	-	-	-	-	-
PsCam057543	16.3566	chr2LG1	24697311	1		-	-	-	-	-	-	-	-	-	-	-	-	-	-	-	-	-	-	-	-	-	-	-	-	-	-	-	-	-	-	-	-	-	-	-	-	-	-	-	-	-	-	-	-
PsCam015065	16.7256	chr2LG1	24877811	1		-	-	-	-	-	-	-	-	-	-	-	-	-	-	-	-	-	-	-	-	-	-	-	-	-	-	-	-	-	-	-	-	-	-	-	-	-	-	-	-	-	-	-	-
PsCam039552	16.7256	chr2LG1	24936451	1		-	-	-	-	-	-	-	-	-	-	-	-	-	-	-	-	-	-	-	-	-	-	-	-	-	-	-	-	-	-	-	-	-	-	-	-	-	-	-	-	-	-	-	-
PsCam048214	16.9788	chr2LG1	25344548	1		-	-	-	-	-	-	-	-	-	-	-	-	-	-	-	-	-	-	-	-	-	-	-	-	-	-	-	-	-	-	-	-	-	-	-	-	-	-	-	-	-	-	-	-
PsCam043213	17.232	chr2LG1	23456454	1		E	K	E	E	E	E	K	E	E	K	K	-	E	K	K	E	K	E	E	K	K	K	E	E	E	K	E	K	K	K	K	E	K	E	K	E	K	E	K	K	K	K	E	E
PsCam046138	17.232	chr2LG1	30109432	1		E	K	E	E	E	E	K	E	E	K	K	-	E	K	K	E	K	E	E	K	K	K	E	E	E	K	E	K	K	K	K	E	K	E	K	E	K	E	K	K	K	K	E	E
PsCam000078	17.232	chr2LG1	30062192	1		-	-	-	-	-	-	-	-	-	-	-	-	-	-	-	-	-	-	-	-	-	-	-	-	-	-	-	-	-	-	-	-	-	-	-	-	-	-	-	-	-	-	-	-
PsCam006916	17.232	chr2LG1	28972814	1		E	K	E	E	E	E	K	E	E	K	K	-	E	K	K	E	K	E	E	K	K	K	E	E	E	K	E	K	K	K	K	E	K	E	K	E	K	E	K	K	K	K	E	E
PsCam042978	17.232	chr2LG1	28991409	1		E	K	E	E	E	E	K	E	E	K	K	E	E	K	K	E	K	E	E	K	K	K	E	E	E	K	E	K	K	K	K	E	K	E	K	E	K	E	K	K	K	K	E	E
PsCam057268	17.232	scaffold02607	213672	1		E	K	E	E	E	E	K	E	E	K	K	-	E	K	K	E	K	E	E	K	K	K	E	E	E	K	E	K	K	K	K	E	K	E	K	E	K	E	K	K	K	K	E	E
PsCam010734	17.4801	chr2LG1	31153573	1		E	K	E	E	E	E	K	E	E	K	K	-	E	K	K	E	K	K	E	K	K	K	E	E	E	K	E	K	K	K	K	E	K	E	K	E	K	E	K	K	K	K	E	E
PsCam048453	17.7326	chr2LG1	30293996	1		E	K	E	E	E	E	K	E	E	K	K	K	E	K	K	E	K	K	E	K	K	K	E	E	E	K	E	K	K	K	K	E	K	E	K	E	K	E	K	K	K	K	E	E
PsCam036419	17.7326	chr2LG1	30283876	1		E	K	E	E	E	E	K	E	E	K	K	K	E	K	K	E	K	K	E	K	K	K	E	E	E	K	E	K	K	K	K	E	K	E	K	E	K	E	K	K	K	K	E	E
PsCam006720	19.3285	super-scaffold1306	145564	1		-	-	-	-	-	-	-	-	-	-	-	-	-	-	-	-	-	-	-	-	-	-	-	-	-	-	-	-	-	-	-	-	-	-	-	-	-	-	-	-	-	-	-	-
PsCam004586	19.3285	chr2LG1	31960181	1		-	-	-	-	-	-	-	-	-	-	-	-	-	-	-	-	-	-	-	-	-	-	-	-	-	-	-	-	-	-	-	-	-	-	-	-	-	-	-	-	-	-	-	-
PsCam051804	19.3285	chr2LG1	31990510	1		E	K	E	E	E	E	K	K	E	K	K	K	E	K	K	E	K	K	E	K	K	K	E	E	E	K	E	K	K	K	K	E	K	E	K	E	K	E	K	K	K	K	E	E
PsCam004602	19.3285	chr2LG1	32068142	1		-	-	-	-	-	-	-	-	-	-	-	-	-	-	-	-	-	-	-	-	-	-	-	-	-	-	-	-	-	-	-	-	-	-	-	-	-	-	-	-	-	-	-	-
PsCam058297	19.3285	chr2LG1	32569713	1		-	-	-	-	-	-	-	-	-	-	-	-	-	-	-	-	-	-	-	-	-	-	-	-	-	-	-	-	-	-	-	-	-	-	-	-	-	-	-	-	-	-	-	-
PsCam034127	19.3285	chr2LG1	32565256	1		E	K	E	E	E	E	K	K	E	K	K	K	E	K	K	E	K	K	E	K	K	K	E	E	E	K	E	K	K	K	K	E	K	E	K	E	K	E	K	K	K	K	E	E
PsCam001049	19.3285	chr2LG1	32550341	1		E	K	E	E	E	E	K	K	E	K	K	K	E	K	K	E	K	K	E	K	K	K	E	E	E	K	E	K	K	K	K	E	K	E	K	E	K	E	K	K	K	K	E	E
PsCam037720	19.3285	chr2LG1	32541198	1		-	-	-	-	-	-	-	-	-	-	-	-	-	-	-	-	-	-	-	-	-	-	-	-	-	-	-	-	-	-	-	-	-	-	-	-	-	-	-	-	-	-	-	-
PsCam047138	20.2994	scaffold01214	128770	1		E	K	E	E	E	E	K	K	E	K	K	K	E	K	K	E	K	K	E	K	K	K	E	E	E	K	E	K	K	K	K	E	K	E	K	E	K	E	K	K	K	K	E	E
PsCam043119	20.2994	chr2LG1	37956911	1		E	K	E	E	E	E	K	K	E	K	K	K	E	K	K	E	K	K	E	K	K	K	E	E	E	K	E	K	K	K	K	E	K	E	K	E	K	E	K	K	K	K	E	E
PsCam046656	20.2994	chr2LG1	37973386	1		E	K	E	E	E	E	K	K	E	K	K	K	E	K	K	E	K	K	E	K	K	K	E	E	E	K	E	K	K	K	K	E	K	E	K	E	K	E	K	K	K	K	E	-
PsCam047774	21.169	chr2LG1	37973386	1		E	K	E	E	E	E	K	K	E	K	K	K	K	K	K	E	K	K	E	K	K	K	E	E	E	K	E	K	K	K	K	E	K	E	K	E	K	E	K	K	K	K	E	E
PsCam037678	21.169	chr2LG1	28588316	1		E	K	E	E	E	E	K	K	E	K	K	K	K	K	K	E	K	K	E	K	K	K	E	E	E	K	E	K	K	K	K	E	K	E	K	E	K	E	K	K	K	K	E	E
PsCam040792	21.169	scaffold00207	588087	1		E	K	E	E	E	E	K	K	E	K	K	K	E	K	K	E	K	K	E	K	K	K	E	E	E	K	E	K	K	K	K	E	K	E	K	E	K	E	K	K	K	K	E	E
PsCam009835	21.4159	chr3LG5	395882295	1		E	K	E	E	E	E	K	K	E	K	K	K	K	K	K	E	K	K	E	K	K	K	E	E	E	K	E	K	K	K	K	E	K	E	K	E	K	E	K	K	K	K	E	E
PsCam056149	21.6628	chr2LG1	40058292	1		E	K	E	E	E	E	K	K	E	K	K	K	K	K	K	E	K	K	E	K	K	K	E	E	E	K	E	K	K	K	K	E	K	E	K	E	K	E	K	K	K	K	E	E
PsCam023270	21.7874	chr2LG1	38082715	1		E	K	E	E	E	E	K	K	E	K	K	K	K	K	K	E	K	K	E	E	K	K	E	E	E	K	E	K	K	K	K	E	K	E	K	E	K	E	K	K	K	K	E	E
PsCam048538	21.7874	chr2LG1	38095744	1		E	K	E	E	E	E	K	K	E	K	K	K	K	K	K	E	K	K	E	E	K	K	E	E	E	K	E	K	K	K	K	E	K	E	K	E	K	E	K	K	K	K	E	E
PsCam049392	21.7874	chr2LG1	38102367	1		E	K	E	E	E	E	K	K	E	K	K	K	K	K	K	E	K	K	E	E	K	K	E	E	E	K	E	K	K	K	K	E	K	E	K	E	K	E	K	K	K	K	E	E
PsCam017112	21.7874	chr2LG1	38112013	1		E	K	E	E	E	E	K	K	E	K	K	K	K	K	K	E	K	K	E	E	K	K	E	E	E	K	E	K	K	K	K	E	K	E	K	E	K	E	K	K	K	K	E	E
PsCam037799	22.0343	chr2LG1	40408618	1		E	K	E	E	E	E	K	K	E	K	K	K	K	K	K	E	K	K	E	E	K	E	E	E	E	K	E	K	K	K	K	E	K	E	K	E	K	E	K	K	K	K	E	E
PsCam036307	22.0343	chr2LG1	40523894	1		E	K	E	E	E	E	K	K	E	K	K	K	K	K	K	E	K	K	E	E	K	E	E	E	E	K	E	K	K	K	K	E	K	E	K	E	K	E	K	K	K	K	E	E
PsCam042819	22.7714	chr2LG1	45877618	1		E	K	E	E	E	E	K	K	E	K	K	K	K	K	K	E	K	K	E	E	K	E	E	E	E	K	E	K	K	K	K	E	K	E	K	E	K	E	K	K	K	K	E	E
PsCam037810	23.0089	chr2LG1	41727448	1		E	K	E	E	E	E	K	K	E	K	K	K	K	K	K	E	K	K	E	E	K	E	E	E	E	K	E	K	K	K	K	E	K	E	K	E	K	E	K	K	K	K	E	E
PsCam034155	23.2465	chr2LG1	41921538	1		-	-	-	-	-	-	-	-	-	-	-	-	-	-	-	-	-	-	-	-	-	-	-	-	-	-	-	-	-	-	-	-	-	-	-	-	-	-	-	-	-	-	-	-
PsCam057773	23.484	chr2LG1	41957194	1		E	K	E	E	E	E	K	K	E	K	K	K	K	K	K	E	K	K	E	E	K	E	E	E	E	K	E	K	K	K	K	E	K	E	K	E	K	E	K	K	K	K	E	E
PsCam040935	23.484	chr2LG1	41433774	1		-	-	-	-	-	-	-	-	-	-	-	-	-	-	-	-	-	-	-	-	-	-	-	-	-	-	-	-	-	-	-	-	-	-	-	-	-	-	-	-	-	-	-	-
PsCam013500	23.484	chr2LG1	41019214	1		-	-	-	-	-	-	-	-	-	-	-	-	-	-	-	-	-	-	-	-	-	-	-	-	-	-	-	-	-	-	-	-	-	-	-	-	-	-	-	-	-	-	-	-
PsCam058026	23.484	chr2LG1	41113808	1		-	-	-	-	-	-	-	-	-	-	-	-	-	-	-	-	-	-	-	-	-	-	-	-	-	-	-	-	-	-	-	-	-	-	-	-	-	-	-	-	-	-	-	-
PsCam046402	23.484	chr2LG1	41117726	1		E	K	E	E	E	E	K	K	E	K	K	K	K	K	K	E	K	K	E	E	K	E	E	E	E	K	E	K	K	K	K	E	K	E	K	E	K	E	K	K	K	K	E	E
PsCam048100	23.484	chr2LG1	44034817	1		E	K	E	E	E	E	K	K	E	K	K	K	K	K	K	E	K	K	E	E	K	E	E	E	E	K	E	K	K	K	K	E	K	E	K	E	K	E	K	K	K	K	E	E
PsCam036709	23.484	chr2LG1	44036914	1		E	K	E	E	E	E	K	K	E	K	K	K	K	K	K	E	K	K	E	E	K	E	E	E	E	K	E	K	K	K	K	E	K	E	K	E	K	E	K	K	K	K	E	E
PsCam034517	23.484	chr2LG1	43308436	1		-	-	-	-	-	-	-	-	-	-	-	-	-	-	-	-	-	-	-	-	-	-	-	-	-	-	-	-	-	-	-	-	-	-	-	-	-	-	-	-	-	-	-	-
PsCam033292	23.484	chr2LG1	43347844	1		-	-	-	-	-	-	-	-	-	-	-	-	-	-	-	-	-	-	-	-	-	-	-	-	-	-	-	-	-	-	-	-	-	-	-	-	-	-	-	-	-	-	-	-
PsCam027512	23.7372	chr2LG1	43747038	1		E	K	E	E	E	E	K	K	E	K	K	K	K	K	K	E	K	K	E	E	K	E	E	E	E	K	E	K	K	K	K	E	K	E	K	E	K	E	K	K	K	K	E	E
PsCam002551	24.1136	chr2LG1	46307176	1		E	K	E	E	E	E	K	K	E	K	K	K	K	K	K	E	K	K	E	E	K	E	E	E	E	K	E	K	K	K	K	E	K	E	K	E	K	E	K	K	K	K	E	E
PsCam039143	24.2381	chr2LG1	43820823	1		E	K	E	E	E	E	K	K	E	K	K	K	K	K	K	E	K	K	E	E	K	E	E	E	E	K	E	K	K	K	K	E	K	E	K	E	K	E	K	K	K	K	E	E
PsCam024807	24.2381	chr2LG1	43989669	1		E	K	E	E	E	E	K	K	E	K	K	K	K	K	K	E	K	K	E	E	K	E	E	E	E	K	E	K	K	K	K	E	K	E	K	E	K	E	K	K	K	K	E	E
PsCam000026	24.2381	chr2LG1	44816295	1		-	-	-	-	-	-	-	-	-	-	-	-	-	-	-	-	-	-	-	-	-	-	-	-	-	-	-	-	-	-	-	-	-	-	-	-	-	-	-	-	-	-	-	-
PsCam054728	24.6071	chr2LG1	46971277	1		-	-	-	-	-	-	-	-	-	-	-	-	-	-	-	-	-	-	-	-	-	-	-	-	-	-	-	-	-	-	-	-	-	-	-	-	-	-	-	-	-	-	-	-
PsCam036902	24.6071	chr2LG1	47292343	1		-	-	-	-	-	-	-	-	-	-	-	-	-	-	-	-	-	-	-	-	-	-	-	-	-	-	-	-	-	-	-	-	-	-	-	-	-	-	-	-	-	-	-	-
PsCam045486	24.6071	chr2LG1	47351377	1		E	K	E	E	E	E	K	K	E	K	K	K	K	K	K	E	K	K	E	E	K	E	E	E	E	K	E	K	E	E	K	E	K	E	K	E	K	E	K	K	K	K	E	E
PsCam042235	24.8571	chr2LG1	47667338	1		E	K	E	E	E	E	K	K	E	K	K	K	K	K	K	E	K	K	E	E	K	E	E	E	E	K	E	K	E	E	K	E	K	E	K	E	K	E	K	K	K	K	E	E
PsCam021150	25.1071	chr2LG1	48579722	1		E	K	E	E	E	E	K	K	E	K	K	K	K	K	K	E	K	K	E	E	K	E	E	E	E	K	E	K	E	E	K	E	K	E	K	E	K	E	K	K	K	K	E	E
PsCam036713	25.1071	chr2LG1	47748814	1		E	K	E	E	E	E	K	K	E	K	K	K	K	K	K	E	K	K	E	E	K	E	E	E	E	K	E	K	E	E	K	E	K	E	K	E	K	E	K	K	K	K	E	E
PsCam037405	25.1071	chr2LG1	50151692	1		E	K	E	E	E	E	K	K	E	K	K	K	K	K	K	E	K	K	E	E	K	E	E	E	E	K	E	K	E	E	K	E	K	E	K	E	K	E	K	K	K	K	E	E
PsCam039634	25.1071	chr2LG1	49410772	1		-	-	-	-	-	-	-	-	-	-	-	-	-	-	-	-	-	-	-	-	-	-	-	-	-	-	-	-	-	-	-	-	-	-	-	-	-	-	-	-	-	-	-	-
PsCam042547	25.1071	chr2LG1	51000784	1		-	-	-	-	-	-	-	-	-	-	-	-	-	-	-	-	-	-	-	-	-	-	-	-	-	-	-	-	-	-	-	-	-	-	-	-	-	-	-	-	-	-	-	-
PsCam037629	25.1071	chr2LG1	50680374	1		E	K	E	E	E	E	K	K	E	K	K	K	K	K	K	E	K	K	E	E	K	E	E	E	E	K	E	K	E	E	K	E	K	E	K	E	K	E	K	K	K	K	E	E
PsCam034094	25.1071	chr2LG1	51305604	1		E	K	E	E	E	E	K	K	E	K	K	K	K	K	K	E	K	K	E	E	K	E	E	E	E	K	E	K	E	E	K	E	K	E	K	E	K	E	K	K	K	K	E	E
PsCam000389	25.9703	chr2LG1	50557105	1		E	K	E	E	E	E	K	K	E	E	K	K	K	K	K	E	K	K	E	E	K	E	E	E	E	K	E	K	E	E	K	E	K	E	K	E	K	E	K	K	K	K	E	E
PsCam056091	25.9703	chr2LG1	51808742	1		E	K	E	E	E	E	K	K	E	E	K	K	K	K	K	E	K	K	E	E	K	E	E	E	E	K	E	K	E	E	K	E	K	E	K	E	K	E	K	K	K	K	E	E
PsCam025877	25.9703	chr2LG1	51804029	1		E	K	E	E	E	E	K	K	E	E	K	K	K	K	K	E	K	K	E	E	K	E	E	E	E	K	E	K	E	E	K	E	K	E	K	E	K	E	K	K	K	K	E	E
PsCam058991	25.9703	chr2LG1	51800859	1		E	K	E	E	E	E	K	K	E	E	K	K	K	K	K	E	K	K	E	E	K	E	E	E	E	K	E	K	E	E	K	E	K	E	K	E	K	E	K	K	K	K	E	E
PsCam056188	25.9703	chr2LG1	52264961	1		-	-	-	-	-	-	-	-	-	-	-	-	-	-	-	-	-	-	-	-	-	-	-	-	-	-	-	-	-	-	-	-	-	-	-	-	-	-	-	-	-	-	-	-
PsCam021050	25.9703	chr2LG1	52266041	1		E	K	E	E	E	E	K	K	E	E	K	K	K	K	K	E	K	K	E	E	K	E	E	E	E	K	E	K	E	E	K	E	K	E	K	E	K	E	K	K	K	K	E	E
PsCam038341	25.9703	chr2LG1	58296998	1		E	K	E	E	E	E	K	K	E	E	K	K	K	K	K	E	K	K	E	E	K	E	E	E	E	K	E	K	E	E	K	E	K	E	K	E	K	E	K	K	K	K	E	E
PsCam006168	25.9703	chr2LG1	52425203	1		-	-	-	-	-	-	-	-	-	-	-	-	-	-	-	-	-	-	-	-	-	-	-	-	-	-	-	-	-	-	-	-	-	-	-	-	-	-	-	-	-	-	-	-
PsCam002164	25.9703	chr2LG1	52425847	1		-	-	-	-	-	-	-	-	-	-	-	-	-	-	-	-	-	-	-	-	-	-	-	-	-	-	-	-	-	-	-	-	-	-	-	-	-	-	-	-	-	-	-	-
PsCam051365	25.9703	chr2LG1	53031935	1		E	K	E	E	E	E	K	K	E	E	K	K	K	K	K	E	K	K	E	E	K	E	E	E	E	K	E	K	E	E	K	E	K	E	K	E	K	E	K	K	K	K	E	E
PsCam025718	25.9703	chr2LG1	55831714	1		E	K	E	E	E	E	K	K	E	E	K	K	K	K	K	E	K	K	E	E	K	E	E	E	E	K	E	K	E	E	K	E	K	E	K	E	K	E	K	K	K	K	E	E
PsCam024956	25.9703	chr2LG1	55606326	1		E	K	E	E	E	E	K	K	E	E	K	K	K	K	K	E	K	K	E	E	K	E	E	E	E	K	E	K	E	E	K	E	K	E	K	E	K	E	K	K	K	K	E	E
PsCam025690	26.0948	chr2LG1	57251688	1		E	K	E	E	E	E	K	K	E	E	K	K	K	K	K	E	K	K	E	E	K	E	E	E	E	K	E	K	E	E	K	E	K	E	K	E	K	E	K	K	K	K	E	E
PsCam053122	26.8562	chr2LG1	57857071	1		E	K	E	E	E	E	K	K	E	E	K	K	K	K	K	E	K	K	E	E	K	E	K	E	E	K	E	K	E	E	K	E	K	E	K	E	K	E	K	K	K	K	E	E
PsCam002548	26.8562	chr2LG1	58503854	1		E	K	E	E	E	E	K	K	E	E	K	K	K	K	K	E	K	K	E	E	K	E	K	E	E	K	E	K	E	E	K	E	K	E	K	E	K	E	K	K	K	K	E	E
PsCam044269	27.2326	chr2LG1	66163900	1		E	K	K	E	E	E	K	K	E	E	K	K	K	K	K	E	K	K	E	E	K	E	K	E	E	K	E	K	E	E	K	E	K	E	K	E	K	E	K	K	K	K	E	E
PsCam007876	28.2557	chr2LG1	66488225	1		E	K	K	E	E	E	K	K	E	E	K	K	K	K	K	E	K	K	E	E	K	E	K	E	K	K	E	K	E	E	K	E	K	E	K	E	K	E	K	K	K	K	E	E
PsCam005219	28.2557	chr2LG1	66543611	1		E	K	K	E	E	E	K	K	E	E	K	K	K	K	K	E	K	K	E	E	K	E	K	E	K	K	E	K	E	E	K	E	K	E	K	E	K	E	K	K	K	K	E	E
PsCam034355	28.2557	chr2LG1	67368073	1		E	K	K	E	E	E	K	K	E	E	K	K	K	K	K	E	K	K	E	E	K	E	K	E	K	K	E	K	E	E	K	E	K	E	K	E	K	E	K	K	K	K	E	E
PsCam048840	28.2557	chr2LG1	67358463	1		E	K	K	E	E	E	K	K	E	E	K	K	K	K	K	E	K	K	E	E	K	E	K	E	K	K	E	K	E	E	K	E	K	E	K	E	K	E	K	K	K	K	E	E
PsCam035546	28.2557	chr2LG1	68711875	1		E	K	K	E	E	E	K	K	E	E	K	K	K	K	K	E	K	K	E	E	K	E	K	E	K	K	E	K	E	E	K	E	K	E	K	E	K	E	K	K	K	K	E	E
PsCam038028	28.2557	chr2LG1	68717358	1		E	K	K	E	E	E	K	K	E	E	K	K	K	K	K	E	K	K	E	E	K	E	K	E	K	K	E	K	E	E	K	E	K	E	K	E	K	E	K	K	K	K	E	E
PsCam003814	28.2557	chr2LG1	68876935	1		E	K	K	E	E	E	K	K	E	E	K	K	K	K	K	E	K	K	E	E	K	E	K	E	K	K	E	K	E	E	K	E	K	E	K	E	K	E	K	K	K	K	E	E
PsCam034084	28.2557	chr2LG1	68925883	1		E	K	K	E	E	E	K	K	E	E	K	K	K	K	K	E	K	K	E	E	K	E	K	E	K	K	E	K	E	E	K	E	K	E	K	E	K	E	K	K	K	K	E	E
PsCam044271	28.2557	chr2LG1	78851991	1		E	K	K	E	E	E	K	K	E	E	K	K	K	K	K	E	K	K	E	E	K	E	K	E	K	K	E	K	E	E	K	E	K	E	K	E	K	E	K	K	K	K	E	E
PsCam016968	28.3847	chr2LG1	67980510	1		E	K	K	E	E	E	K	K	E	E	K	K	K	K	K	E	K	K	E	E	K	E	K	E	K	K	E	K	E	E	K	E	K	E	K	E	K	E	K	K	K	K	E	E
PsCam021480	28.5138	chr2LG1	70178555	1		E	K	K	E	E	E	K	K	E	E	K	K	K	K	K	E	K	K	E	E	K	E	K	E	K	K	E	K	E	E	K	E	K	E	K	E	K	E	K	K	K	K	E	E
PsCam038971	28.8921	chr2LG1	74567716	1		E	K	K	E	E	E	K	K	E	E	K	K	K	K	K	E	K	K	E	E	K	E	K	E	K	K	E	K	E	E	K	E	K	E	K	E	K	E	K	K	K	K	E	E
PsCam034726	29.7861	chr2LG1	77805323	1		E	K	K	E	E	E	K	K	E	E	K	-	K	E	K	E	K	K	E	E	E	E	K	E	K	K	E	K	E	E	K	E	E	E	K	E	K	K	K	K	K	K	E	E
PsCam000706	29.7861	chr2LG1	75722287	1		E	K	K	E	E	E	K	K	E	E	K	-	K	E	K	E	K	K	E	E	E	E	K	E	K	K	E	K	E	E	K	E	E	E	K	E	K	K	K	K	K	K	E	E
PsCam038652	29.7861	chr2LG1	75695888	1		E	K	K	E	E	E	K	K	E	E	K	K	K	E	K	E	K	K	E	E	E	E	K	E	K	K	E	K	E	E	K	E	E	E	K	E	K	K	K	K	K	K	E	E
PsCam050178	29.9109	chr2LG1	76045050	1		E	K	K	E	E	E	K	K	E	E	K	-	K	E	K	E	K	K	E	E	E	E	K	E	K	K	E	K	E	E	K	E	E	E	K	E	K	K	K	K	K	K	E	E
PsCam039819	29.9109	chr2LG1	75921694	1		E	K	K	E	E	E	K	K	E	E	K	-	K	E	K	E	K	K	E	E	E	E	K	E	K	K	E	K	E	E	K	E	E	E	K	E	K	K	K	K	K	K	E	E
PsCam000599	30.0358	chr2LG1	77572780	1		E	K	K	E	E	E	K	K	E	E	K	K	K	E	K	E	K	K	E	E	E	E	K	E	K	K	E	K	E	E	K	E	E	E	K	E	K	K	K	K	K	K	E	E
PsCam042797	30.0358	chr2LG1	77523222	1		E	K	K	E	E	E	K	K	E	E	K	K	K	E	K	E	K	K	E	E	E	E	K	E	K	K	E	K	E	E	K	E	E	E	K	E	K	K	K	K	K	K	E	E
PsCam042240	30.1603	chr2LG1	78249622	1		E	K	K	E	E	E	K	K	E	E	K	K	K	E	K	E	K	K	E	E	E	E	K	E	K	K	E	K	E	E	K	E	E	E	K	E	K	K	K	K	K	K	E	E
PsCam050131	30.1603	chr2LG1	78241439	1		E	K	K	E	E	E	K	K	E	E	K	K	K	E	K	E	K	K	E	E	E	E	K	E	K	K	E	K	E	E	K	E	E	E	K	E	K	K	K	K	K	K	E	E
PsCam045025	30.1603	chr2LG1	78205853	1		E	K	K	E	E	E	K	K	E	E	K	K	K	E	K	E	K	K	E	E	E	E	K	E	K	K	E	K	E	E	K	E	E	E	K	E	K	K	K	K	K	K	E	E
PsCam048487	30.1603	chr2LG1	78157480	1		E	K	K	E	E	E	K	K	E	E	K	-	K	E	K	E	K	K	E	E	E	E	K	E	K	K	E	K	E	E	K	E	E	E	K	E	K	K	K	K	K	K	E	E
PsCam055191	30.2852	chr2LG1	79159023	1		E	K	K	E	E	E	K	K	E	E	K	K	K	E	K	E	K	K	E	E	E	E	K	E	K	K	E	K	E	E	K	E	E	E	K	E	K	K	K	K	K	K	E	E
PsCam057513	30.6625	chr2LG1	80238513	1		E	K	K	E	E	E	K	K	E	E	K	-	K	E	K	E	K	K	E	E	E	E	K	E	K	K	E	K	E	E	K	E	E	E	K	E	K	K	K	K	E	K	E	E
PsCam048423	30.6625	chr2LG1	79312869	1		E	K	K	E	E	E	K	K	E	E	K	K	K	E	K	E	K	K	E	E	E	E	K	E	K	K	E	K	E	E	K	E	E	E	K	E	K	K	K	K	E	K	E	E
PsCam049864	30.6625	chr2LG1	79368513	1		-	-	-	-	-	-	-	-	-	-	-	-	-	-	-	-	-	-	-	-	-	-	-	-	-	-	-	-	-	-	-	-	-	-	-	-	-	-	-	-	-	-	-	-
PsCam038676	31.4982	chr2LG1	80470984	1		E	K	K	E	E	E	K	K	E	E	K	-	K	E	K	E	K	K	E	E	E	E	K	E	K	K	E	K	E	E	K	E	E	E	K	E	K	K	K	K	E	K	E	E
PsCam040389	31.7488	chr2LG1	80823451	1		E	K	K	E	E	E	K	K	E	E	K	-	K	E	K	E	K	K	E	E	E	E	K	E	K	K	E	E	E	E	K	E	E	E	K	E	K	K	K	K	E	K	E	E
PsCam004782	31.7488	chr2LG1	80961684	1		E	K	K	E	E	E	K	K	E	E	K	K	K	E	K	E	K	K	E	E	E	E	K	E	K	K	E	E	E	E	K	E	E	E	K	E	K	K	K	K	E	K	E	E
PsCam051633	31.8734	chr2LG1	81028484	1		E	K	K	E	E	E	K	K	E	E	K	K	K	E	K	E	K	K	E	E	E	E	K	E	K	K	E	E	E	E	K	E	E	E	K	E	K	K	K	K	E	K	E	E
PsCam021748	31.9982	chr2LG1	81258674	1		E	K	K	E	E	E	K	K	E	E	K	K	K	E	K	E	K	K	E	E	E	E	K	E	K	K	E	E	E	E	K	E	E	E	K	E	K	K	K	K	E	K	E	E
PsCam009560	31.9982	chr2LG1	82983792	1		E	K	K	E	E	E	K	K	E	E	K	-	K	E	K	E	K	K	E	E	E	E	K	E	K	K	E	E	E	E	K	E	E	E	K	E	K	K	K	K	E	K	E	E
PsCam035769	32.123	chr2LG1	83025684	1		E	K	K	E	E	E	K	K	E	E	K	-	K	E	K	E	K	K	E	E	E	E	K	E	K	K	E	E	E	E	K	E	E	E	K	E	K	K	K	K	E	K	E	E
PsCam056065	32.123	chr2LG1	86181129	1		E	K	K	E	E	E	K	K	E	E	K	K	K	E	K	E	K	K	E	E	E	E	K	E	K	K	E	E	E	E	K	E	E	E	K	E	K	K	K	K	E	K	K	E
PsCam010135	32.3869	chr2LG1	88502244	1		-	-	-	-	-	-	-	-	-	-	-	-	-	-	-	-	-	-	-	-	-	-	-	-	-	-	-	-	-	-	-	-	-	-	-	-	-	-	-	-	-	-	-	-
PsCam037666	32.3869	chr2LG1	88471160	1		E	K	K	E	E	E	K	K	E	E	K	-	K	E	K	E	K	K	E	E	E	E	K	E	K	K	E	E	E	E	K	E	E	E	K	E	K	K	K	K	E	K	K	E
PsCam037233	32.6375	chr2LG1	84722773	1		E	K	K	E	E	E	K	E	E	E	K	K	K	E	K	E	K	K	E	E	E	E	K	E	K	K	E	E	E	E	K	E	E	E	K	E	K	K	K	K	E	K	K	E
PsCam049002	32.7624	chr2LG1	86957139	1		E	K	K	E	E	E	K	E	E	E	K	K	K	E	K	E	K	K	E	E	E	E	K	E	K	K	E	E	E	E	K	E	E	E	K	E	K	K	K	K	E	K	K	E
PsCam048927	32.7624	chr2LG1	88606735	1		E	K	K	E	E	E	K	E	E	E	K	-	K	E	K	E	K	K	E	E	E	E	K	E	K	K	E	E	E	E	K	E	E	E	K	E	K	K	K	K	E	K	K	E
PsCam050293	32.8872	chr2LG1	86025863	1		E	K	K	E	E	E	K	E	E	E	K	K	K	E	K	E	K	K	E	E	E	E	K	E	K	K	E	E	E	E	K	E	E	E	K	E	K	K	K	K	E	K	K	E
PsCam000099	33.1378	chr2LG1	89490125	1		E	K	K	E	E	E	K	E	E	E	K	-	K	E	K	E	K	K	E	E	E	K	K	E	K	K	E	E	E	E	K	E	E	E	K	E	K	K	K	K	E	K	K	E
PsCam049034	33.1378	chr2LG1	89273571	1		E	K	K	E	E	E	K	E	E	E	K	K	K	E	K	E	K	K	E	E	E	K	K	E	K	K	E	E	E	E	K	E	E	E	K	E	K	K	K	K	E	K	K	E
PsCam046540	33.1378	chr2LG1	89258163	1		E	K	K	E	E	E	K	E	E	E	K	-	K	E	K	E	K	K	E	E	E	K	K	E	K	K	E	E	E	E	K	E	E	E	K	E	K	K	K	K	E	K	K	E
PsCam048090	35.2546	chr2LG1	91575978	1		E	K	K	E	E	E	K	E	E	E	K	K	K	E	K	E	K	K	E	E	E	K	K	E	K	K	E	E	E	E	K	E	E	E	K	E	K	K	K	E	E	K	K	E
PsCam003233	35.8867	chr2LG1	93457350	1		E	K	K	E	E	E	K	E	E	E	K	K	K	E	K	E	K	K	E	E	E	K	K	E	K	K	E	E	E	E	K	E	E	E	K	K	K	K	K	E	E	K	K	E
PsCam000019	36.3905	chr2LG1	96244758	1		E	K	K	E	E	E	K	E	E	E	K	E	K	E	K	E	K	K	E	E	E	K	K	E	K	K	E	E	E	E	K	E	E	E	K	K	K	K	K	E	E	K	K	E
PsCam043853	36.8942	scaffold03744	80444	1		E	K	K	E	E	E	K	E	E	E	K	E	K	E	K	E	K	K	E	E	E	K	K	K	K	K	E	E	E	E	K	E	E	E	K	K	K	K	K	E	E	K	K	E
PsCam000415	37.398	chr2LG1	95959743	1		E	K	K	E	E	E	K	K	E	E	K	E	K	E	K	E	K	K	E	E	E	K	K	K	K	K	E	E	E	E	K	E	E	E	K	K	K	K	K	E	E	K	K	E
PsCam000515	37.398	chr2LG1	95964891	1		E	K	K	E	E	E	K	K	E	E	K	E	K	E	K	E	K	K	E	E	E	K	K	K	K	K	E	E	E	E	K	E	E	E	K	K	K	K	K	E	E	K	K	E
PsCam035964	38.0301	chr2LG1	97809132	1		E	K	K	E	E	E	K	K	E	E	K	E	K	E	K	E	K	K	E	E	E	K	K	K	K	K	E	E	E	E	K	E	E	E	K	K	K	K	E	E	E	K	K	E
PsCam014118	38.1547	chr2LG1	98780937	1		E	K	K	E	E	E	K	K	E	E	K	E	K	E	K	E	K	K	E	E	E	K	K	K	K	K	E	E	E	E	K	E	E	E	K	K	K	K	E	E	E	K	K	E
PsCam024930	38.4053	chr2LG1	98873802	1		E	K	K	E	E	E	K	K	E	E	K	K	K	E	K	E	K	K	E	E	E	K	K	K	K	K	E	E	E	E	K	K	E	E	K	K	K	K	E	E	E	K	K	E
PsCam029441	38.6559	chr2LG1	99754684	1		E	K	K	E	E	E	K	K	E	E	K	-	K	E	K	E	K	K	E	E	E	K	K	K	K	K	E	E	E	E	K	K	E	E	K	K	K	K	E	E	E	K	K	E
PsCam045345	39.5499	chr2LG1	102468791	1		E	K	K	E	E	E	K	K	E	E	K	-	K	E	K	E	K	K	E	E	E	K	K	K	K	K	E	E	E	E	K	K	E	E	K	K	K	K	E	E	E	K	K	E
PsCam045042	39.6748	chr2LG1	102902003	1		E	K	K	E	E	E	K	K	E	E	K	-	K	E	K	E	K	K	E	E	E	K	K	K	K	K	E	E	E	E	K	K	E	E	K	K	K	K	E	E	E	K	K	E
PsCam026143	39.6748	chr2LG1	102902781	1		E	K	K	E	E	E	K	K	E	E	K	-	K	E	K	E	K	K	E	E	E	K	K	K	K	K	E	E	E	E	K	K	E	E	K	K	K	K	E	E	E	K	K	E
PsCam051768	39.6748	chr2LG1	102904733	1		E	K	K	E	E	E	K	K	E	E	K	-	K	E	K	E	K	K	E	E	E	K	K	K	K	K	E	E	E	E	K	K	E	E	K	K	K	K	E	E	E	K	K	E
PsCam011022	39.6748	chr2LG1	103328638	1		E	K	K	E	E	E	K	K	E	E	K	K	K	E	K	E	K	K	E	E	E	K	K	K	K	K	E	E	E	E	K	K	E	E	K	K	K	K	E	E	E	K	K	E
PsCam037859	39.6748	chr2LG1	103656093	1		E	K	K	E	E	E	K	K	E	E	K	-	K	E	K	E	K	K	E	E	E	K	K	K	K	K	E	E	E	E	K	K	E	E	K	K	K	K	E	E	E	K	K	E
PsCam052313	39.6748	chr2LG1	103675784	1		E	K	K	E	E	E	K	K	E	E	K	K	K	E	K	E	K	K	E	E	E	K	K	K	K	K	E	E	E	E	K	K	E	E	K	K	K	K	E	E	E	K	K	E
PsCam045699	39.6748	chr2LG1	103933066	1		E	K	K	E	E	E	K	K	E	E	K	K	K	E	K	E	K	K	E	E	E	K	K	K	K	K	E	E	E	E	K	K	E	E	K	K	K	K	E	E	E	K	K	E
PsCam037334	39.6748	chr2LG1	103954023	1		E	K	K	E	E	E	K	K	E	E	K	-	K	E	K	E	K	K	E	E	E	K	K	K	K	K	E	E	E	E	K	K	E	E	K	K	K	K	E	E	E	K	K	E
PsCam050690	40.1798	chr2LG1	104621717	1		E	K	K	E	E	E	K	K	E	E	K	K	K	E	K	E	K	K	E	E	E	K	K	K	K	K	E	E	E	E	K	K	E	E	K	K	K	K	E	E	E	K	K	E
PsCam004719	40.3047	chr2LG1	107372584	1		E	K	K	E	E	E	K	K	E	E	K	K	K	E	K	E	K	K	E	E	E	K	K	K	K	K	E	E	E	E	K	K	E	E	K	K	K	K	E	E	E	K	K	E
PsCam029308	40.5559	chr2LG1	106604303	1		K	K	K	E	E	E	K	K	E	E	K	-	K	E	K	E	K	K	E	E	E	K	K	K	K	K	E	E	E	E	K	K	E	E	K	K	K	K	E	E	E	K	K	E
PsCam058172	52.0152	chr2LG1	134815602	1		K	K	K	K	E	E	K	K	E	K	K	-	K	E	E	E	K	K	K	E	E	K	K	K	K	E	E	E	E	E	K	E	E	E	K	K	K	K	E	E	E	K	K	E
PsCam040968	52.141	chr2LG1	135460372	1		K	K	K	K	E	E	K	K	E	K	K	K	K	E	E	E	K	K	K	E	E	K	K	K	K	E	E	E	E	E	K	E	E	E	K	K	K	K	E	E	E	K	K	E
PsCam000536	52.141	chr2LG1	141350049	1		K	K	K	K	E	E	K	K	E	K	K	K	K	E	E	E	K	K	K	E	E	K	K	K	K	E	E	E	E	E	K	E	E	E	K	K	K	K	E	E	E	K	K	E
PsCam037124	52.141	chr2LG1	138573110	1		K	K	K	K	E	E	K	K	E	K	K	K	K	E	E	E	K	K	K	E	E	K	K	K	K	E	E	E	E	E	K	E	E	E	K	K	K	K	E	E	E	K	K	E
PsCam018494	52.141	chr2LG1	141440687	1		K	K	K	K	E	E	K	K	E	K	K	-	K	E	E	E	K	K	K	E	E	K	K	K	K	E	E	E	E	E	K	E	E	E	K	K	K	K	E	E	E	K	K	E
PsCam044222	52.6474	chr2LG1	143516769	1		K	K	K	K	E	E	K	K	E	K	K	K	K	E	E	E	K	K	K	E	E	K	K	K	K	E	E	E	E	E	K	E	E	E	K	K	K	K	E	E	E	K	K	E
PsCam031772	52.6474	chr2LG1	144883203	1		K	K	K	K	E	E	K	K	E	K	K	K	K	E	E	E	K	K	K	E	E	K	K	K	K	E	E	E	E	E	K	E	E	E	K	K	K	K	E	E	E	K	K	E
PsCam000183	52.8993	chr2LG1	144229986	1		K	K	K	K	E	E	K	K	E	K	K	K	K	E	E	E	K	K	K	E	E	K	K	K	K	E	E	E	E	E	K	E	E	E	K	K	K	K	E	E	E	K	K	E
PsCam029303	53.1518	chr2LG1	145609333	1		K	K	K	K	E	E	K	K	E	K	K	K	K	E	E	E	K	K	K	E	E	K	K	K	K	E	E	E	E	E	K	E	E	E	K	K	K	K	E	E	E	K	K	-
PsCam042213	53.2776	chr2LG1	146027040	1		K	K	K	K	E	E	K	K	E	K	K	-	K	E	E	E	K	K	K	E	E	K	K	K	K	E	E	E	E	E	K	E	E	E	K	K	K	K	E	E	E	K	K	E
PsCam045256	53.5288	chr2LG1	155378276	1		K	K	K	K	E	E	K	K	E	K	K	-	K	E	E	E	K	K	K	E	E	K	K	K	K	E	E	E	E	E	K	K	E	E	K	K	K	K	E	E	E	K	K	E
PsCam043252	53.5288	chr2LG1	154167380	1		K	K	K	K	E	E	K	K	E	K	K	-	K	E	E	E	K	K	K	E	E	K	K	K	K	E	E	E	E	E	K	K	E	E	K	K	K	K	E	E	E	K	K	E
PsCam026972	53.5288	chr2LG1	154023089	1		K	K	K	K	E	E	K	K	E	K	K	-	K	E	E	E	K	K	K	E	E	K	K	K	K	E	E	E	E	E	K	K	E	E	K	K	K	K	E	E	E	K	K	E
PsCam060106	53.5288	chr2LG1	157023044	1		K	K	K	K	E	E	K	K	E	K	K	-	K	E	E	E	K	K	K	E	E	K	K	K	K	E	E	E	E	E	K	K	E	E	K	K	K	K	E	E	E	K	K	E
PsCam007473	53.7782	chr2LG1	170780317	1		K	K	K	K	E	E	K	K	E	K	K	-	K	E	E	E	K	K	K	E	E	K	K	K	K	E	K	E	E	E	K	K	E	E	K	K	K	K	E	E	E	K	K	E
PsCam013538	53.7782	chr2LG1	177605393	1		K	K	K	K	E	E	K	K	E	K	K	K	K	E	E	E	K	K	K	E	E	K	K	K	K	E	K	E	E	E	K	K	E	E	K	K	K	K	E	E	E	K	K	E
PsCam034566	53.7782	chr2LG1	190099363	1		K	K	K	K	E	E	K	K	E	K	K	K	K	E	E	E	K	K	K	E	E	K	K	K	K	E	K	E	E	E	K	K	E	E	K	K	K	K	E	E	E	K	K	E
PsCam035469	53.9043	chr2LG1	200494086	1		K	K	K	K	E	E	K	K	E	K	K	K	K	E	E	E	K	K	K	E	E	K	K	K	K	E	K	E	E	E	K	K	E	E	K	K	K	K	E	E	E	K	K	E
PsCam040735	54.0295	chr2LG1	167869121	1		K	K	K	K	E	E	K	K	E	K	K	K	K	E	E	E	K	K	K	E	E	K	K	K	K	E	K	E	E	E	K	K	E	E	K	K	K	K	E	E	E	K	K	E
PsCam045222	54.0295	chr2LG1	167528080	1		K	K	K	K	E	E	K	K	E	K	K	K	K	E	E	E	K	K	K	E	E	K	K	K	K	E	K	E	E	E	K	K	E	E	K	K	K	K	E	E	E	K	K	E
PsCam033964	54.0295	chr2LG1	167534539	1		K	K	K	K	E	E	K	K	E	K	K	-	K	E	E	E	K	K	K	E	E	K	K	K	K	E	K	E	E	E	K	K	E	E	K	K	K	K	E	E	E	K	K	E
PsCam002727	54.0295	chr2LG1	169108112	1		K	K	K	K	E	E	K	K	E	K	K	K	K	E	E	E	K	K	K	E	E	K	K	K	K	E	K	E	E	E	K	K	E	E	K	K	K	K	E	E	E	K	K	E
PsCam052641	54.0295	chr2LG1	170164596	1		K	K	K	K	E	E	K	K	E	K	K	-	K	E	E	E	K	K	K	E	E	K	K	K	K	E	K	E	E	E	K	K	E	E	K	K	K	K	E	E	E	K	K	E
PsCam002971	54.0295	chrsLG5	257748177	1		K	K	K	K	E	E	K	K	E	K	K	-	K	E	E	E	K	K	K	E	E	K	K	K	K	E	K	E	E	E	K	K	E	E	K	K	K	K	E	E	E	K	K	E
PsCam034131	54.0295	chr2LG1	159465651	1		K	K	K	K	E	E	K	K	E	K	K	-	K	E	E	E	K	K	K	E	E	K	K	K	K	E	K	E	E	E	K	K	E	E	K	K	K	K	E	E	E	K	K	E
PsCam046075	54.0295	chr2LG1	160793229	1		K	K	K	K	E	E	K	K	E	K	K	-	K	E	E	E	K	K	K	E	E	K	K	K	K	E	K	E	E	E	K	K	E	E	K	K	K	K	E	E	E	K	K	E
PsCam036879	54.0295	chr2LG1	163259859	1		K	K	K	K	E	E	K	K	E	K	K	-	K	E	E	E	K	K	K	E	E	K	K	K	K	E	K	E	E	E	K	K	E	E	K	K	K	K	E	E	E	K	K	E
PsCam007598	54.0295	chr2LG1	163170680	1		K	K	K	K	E	E	K	K	E	K	K	-	K	E	E	E	K	K	K	E	E	K	K	K	K	E	K	E	E	E	K	K	E	E	K	K	K	K	E	E	E	K	K	E
PsCam054070	54.0295	chr2LG1	161174637	1		K	K	K	K	E	E	K	K	E	K	K	-	K	E	E	E	K	K	K	E	E	K	K	K	K	E	K	E	E	E	K	K	E	E	K	K	K	K	E	E	E	K	K	E
PsCam038176	54.0295	chr2LG1	165511751	1		K	K	K	K	E	E	K	K	E	K	K	-	K	E	E	E	K	K	K	E	E	K	K	K	K	E	K	E	E	E	K	K	E	E	K	K	K	K	E	E	E	K	K	E
PsCam019041	54.2807	chr2LG1	189683014	1		K	K	K	K	E	E	K	K	E	K	K	K	K	E	E	E	K	K	K	E	E	K	K	K	K	E	K	E	E	E	K	K	E	E	K	K	K	K	E	E	E	K	K	E
PsCam057073	54.2807	chr2LG1	193431644	1		K	K	K	K	E	E	K	K	E	K	K	-	K	E	E	E	K	K	K	E	E	K	K	K	K	E	K	E	E	E	K	K	E	E	K	K	K	K	E	E	E	K	K	E
PsCam000468	54.2807	chr2LG1	274021323	1		K	K	K	K	E	E	K	K	E	K	K	K	K	E	E	E	K	K	K	E	E	K	K	K	K	E	K	E	E	E	K	K	E	E	K	K	K	K	E	E	E	K	K	E
PsCam018270	54.6639	chr2LG1	278863742	1		K	K	K	K	E	E	K	K	E	K	K	-	K	E	E	E	K	K	K	E	E	K	K	K	K	E	K	E	E	E	K	K	E	E	K	K	K	K	E	E	E	K	K	E
PsCam007569	54.6639	chr2LG1	278862675	1		K	K	K	K	E	E	K	K	E	K	K	-	K	E	E	E	K	K	K	E	E	K	K	K	K	E	K	E	E	E	K	K	E	E	K	K	K	K	E	E	E	K	K	E
PsCam045801	54.6639	chr2LG1	274477156	1		K	K	K	K	E	E	K	K	E	K	K	-	K	E	E	E	K	K	K	E	E	K	K	K	K	E	K	E	E	E	K	K	E	E	K	K	K	K	E	E	E	K	K	E
PsCam015055	55.0858	chr2LG1	279187235	1		K	K	-	-	E	E	K	K	E	K	-	-	-	-	E	E	K	K	-	E	E	-	K	K	K	E	-	E	E	E	K	K	E	E	-	-	-	-	E	E	E	-	-	E
PsCam006653	55.0858	chr2LG1	279458878	1		K	K	K	K	E	E	K	K	E	K	K	-	K	E	E	E	K	K	K	E	E	K	K	K	K	E	K	E	E	E	K	K	E	E	K	K	K	K	E	E	E	K	K	E
PsCam034828	55.0858	chr2LG1	282212026	1		K	K	K	K	E	E	K	K	E	K	K	K	K	E	E	E	K	K	K	E	E	K	K	K	K	E	K	E	E	E	K	K	E	E	K	K	K	K	E	E	E	K	K	E
PsCam043460	55.0858	chr2LG1	282501824	1		K	K	K	K	E	E	K	K	E	K	K	K	K	E	E	E	K	K	K	E	E	K	K	K	K	E	K	E	E	E	K	K	E	E	K	K	K	K	E	E	E	K	K	E
PsCam001137	55.0858	chr2LG1	282574296	1		K	K	K	K	E	E	K	K	E	K	K	-	K	E	E	E	K	K	K	E	E	K	K	K	K	E	K	E	E	E	K	K	E	E	K	K	K	K	E	E	E	K	K	E
PsCam048284	55.211	chr2LG1	275918415	1		K	K	K	K	E	E	K	K	E	K	K	K	K	E	E	E	K	K	K	E	E	K	K	K	K	E	K	E	E	E	K	K	E	E	K	K	K	K	E	E	E	K	K	E
PsCam055186	55.211	chr2LG1	275919402	1		K	K	K	K	E	E	K	K	E	K	K	K	K	E	E	E	K	K	K	E	E	K	K	K	K	E	K	E	E	E	K	K	E	E	K	K	K	K	E	E	E	K	K	E
PsCam023994	55.211	chr2LG1	277315111	1		K	K	K	K	E	E	K	K	E	K	K	K	K	E	E	E	K	K	K	E	E	K	K	K	K	E	K	E	E	E	K	K	E	E	K	K	K	K	E	E	E	K	K	E
PsCam004811	55.211	chr2LG1	278140245	1		K	K	K	K	E	E	K	K	E	K	K	-	K	E	E	E	K	K	K	E	E	K	K	K	K	E	K	E	E	E	K	K	E	E	K	K	K	K	E	E	E	K	K	E
PsCam059116	55.4748	chr2LG1	285061479	1		K	K	K	K	E	E	K	K	E	K	K	K	K	E	E	E	K	K	K	E	E	K	K	K	K	E	K	E	E	E	K	K	E	E	K	K	K	K	E	E	E	K	K	E
PsCam049564	55.4748	chr2LG1	286871627	1		K	K	K	K	E	E	K	K	E	K	K	-	K	E	E	E	K	K	K	E	E	K	K	K	K	E	K	E	E	E	K	K	E	E	K	K	K	K	E	E	E	K	K	E
PsCam034859	55.4748	chr2LG1	288907604	1		K	K	K	K	E	E	K	K	E	K	K	K	K	E	E	E	K	K	K	E	E	K	K	K	K	E	K	E	E	E	K	K	E	E	K	K	K	K	E	E	E	K	K	E
PsCam003920	55.4748	chr2LG1	285523922	1		K	K	K	K	E	E	K	K	E	K	K	-	K	E	E	E	K	K	K	E	E	K	K	K	K	E	K	E	E	E	K	K	E	E	K	K	K	K	E	E	E	K	K	E
PsCam034934	55.4748	chr2LG1	285522204	1		K	K	K	K	E	E	K	K	E	K	K	-	K	E	E	E	K	K	K	E	E	K	K	K	K	E	K	E	E	E	K	K	E	E	K	K	K	K	E	E	E	K	K	E
PsCam016996	55.4748	chr2LG1	289845877	1		K	K	K	K	E	E	K	K	E	K	K	-	K	E	E	E	K	K	K	E	E	K	K	K	K	E	K	E	E	E	K	K	E	E	K	K	K	K	E	E	E	K	K	E
PsCam012644	55.4748	chr2LG1	292584588	1		-	-	-	-	-	-	-	-	-	-	-	-	-	-	-	-	-	-	-	-	-	-	-	-	-	-	-	-	-	-	-	-	-	-	-	-	-	-	-	-	-	-	-	-
PsCam059497	55.7769	chr2LG1	292836792	1		K	K	K	K	E	E	K	K	E	K	K	-	K	E	E	E	K	K	K	E	E	K	K	K	K	E	K	E	E	E	K	K	E	E	K	K	K	K	E	E	E	K	K	E
PsCam044964	56.4123	chr2LG1	293190099	1		K	K	K	K	E	E	K	K	E	K	K	K	K	E	E	E	K	K	K	E	E	K	K	K	K	E	K	E	E	E	K	K	E	E	K	K	K	K	E	E	E	K	K	E
PsCam044028	56.9186	chr2LG1	298750281	1		K	K	K	K	E	E	K	K	E	K	E	-	K	E	E	E	K	K	K	E	E	K	K	K	K	E	K	E	E	E	K	K	E	E	K	K	K	K	E	E	E	K	K	E
PsCam043666	56.9186	chr2LG1	298662129	1		K	K	K	K	E	E	K	K	E	K	E	-	K	E	E	E	K	K	K	E	E	K	K	K	K	E	K	E	E	E	K	K	E	E	K	K	K	K	E	E	E	K	K	E
PsCam000567	57.0437	chr2LG1	298656898	1		K	K	K	K	E	E	K	K	E	K	E	-	K	E	E	E	K	K	K	E	E	K	K	K	K	E	K	E	E	E	K	K	E	E	K	K	K	K	E	E	E	K	K	E
PsCam010377	57.0437	scaffold00754	258619	1		K	K	K	K	E	E	K	K	E	K	E	-	K	E	E	E	K	K	K	E	E	K	K	K	K	E	K	E	E	E	K	K	E	E	K	K	K	K	E	E	E	K	K	E
PsCam023363	57.6791	chr2LG1	302633897	1		K	K	K	K	E	E	K	K	K	K	E	K	K	E	E	E	K	K	K	E	E	K	K	K	K	E	K	E	K	K	K	K	E	E	K	K	K	K	E	E	E	K	K	E
PsCam039203	57.6791	chr2LG1	301845835	1		K	K	K	K	E	E	K	K	K	K	E	-	K	E	E	E	K	K	K	E	E	K	K	K	K	E	K	E	K	K	K	K	E	E	K	K	K	K	E	E	E	K	K	E
PsCam002633	57.9303	chr2LG1	302075753	1		K	K	K	K	E	E	K	K	K	K	E	K	K	E	E	E	K	K	K	E	E	K	K	K	K	E	K	E	K	K	K	K	E	E	K	K	K	K	E	E	E	K	K	E
PsCam045325	57.9303	chr2LG1	302480892	1		K	K	K	K	E	E	K	K	K	K	E	K	K	E	E	E	K	K	K	E	E	K	K	K	K	E	K	E	K	K	K	K	E	E	K	K	K	K	E	E	E	K	K	E
PsCam045520	57.9303	chr2LG1	304064268	1		K	K	K	K	E	E	K	K	K	K	E	K	K	E	E	E	K	K	K	E	E	K	K	K	K	E	K	E	K	K	K	K	E	E	K	K	K	K	E	E	E	K	K	E
PsCam038247	59.6343	chr2LG1	310307292	1		K	K	K	K	E	E	K	K	K	K	E	-	K	E	E	E	K	K	K	E	E	K	K	K	K	E	K	E	K	K	K	K	E	E	K	K	K	K	E	E	E	K	K	E
PsCam037533	60.0126	chr2LG1	310842588	1		K	K	K	K	E	E	K	K	K	K	E	-	K	E	E	E	K	K	K	E	E	K	K	K	K	E	K	E	K	K	K	K	E	E	K	K	K	K	E	E	E	K	K	E
PsCam011651	60.6479	chr2LG1	312656627	1		K	K	K	K	E	E	K	K	K	K	E	K	K	E	E	E	K	K	K	E	E	K	K	K	K	E	K	E	K	K	K	K	E	E	K	K	K	K	E	E	E	K	K	E
PsCam038573	60.9011	chr2LG1	313931669	1		K	K	K	K	E	E	K	K	K	K	E	-	K	E	E	E	K	K	K	E	E	K	K	K	K	E	K	E	K	K	K	K	E	E	K	K	K	K	E	E	E	K	K	E
PsCam035777	61.1543	chr2LG1	319544048	1		-	-	-	-	-	-	-	-	-	-	-	-	-	-	-	-	-	-	-	-	-	-	-	-	-	-	-	-	-	-	-	-	-	-	-	-	-	-	-	-	-	-	-	-
PsCam001805	61.3994	chr2LG1	333615499	1		-	-	-	-	-	-	-	-	-	-	-	-	-	-	-	-	-	-	-	-	-	-	-	-	-	-	-	-	-	-	-	-	-	-	-	-	-	-	-	-	-	-	-	-
PsCam040189	61.3994	chr2LG1	323913057	1		-	-	-	-	-	-	-	-	-	-	-	-	-	-	-	-	-	-	-	-	-	-	-	-	-	-	-	-	-	-	-	-	-	-	-	-	-	-	-	-	-	-	-	-
PsCam007337	61.3994	chr2LG1	321960820	1		-	-	-	-	-	-	-	-	-	-	-	-	-	-	-	-	-	-	-	-	-	-	-	-	-	-	-	-	-	-	-	-	-	-	-	-	-	-	-	-	-	-	-	-
PsCam011629	62.1223	chr2LG1	324719474	1		-	-	-	-	-	-	-	-	-	-	-	-	-	-	-	-	-	-	-	-	-	-	-	-	-	-	-	-	-	-	-	-	-	-	-	-	-	-	-	-	-	-	-	-
PsCam057553	62.1223	chr2LG1	324598511	1		-	-	-	-	-	-	-	-	-	-	-	-	-	-	-	-	-	-	-	-	-	-	-	-	-	-	-	-	-	-	-	-	-	-	-	-	-	-	-	-	-	-	-	-
PsCam001596	62.1223	chr2LG1	325796409	1		-	-	-	-	-	-	-	-	-	-	-	-	-	-	-	-	-	-	-	-	-	-	-	-	-	-	-	-	-	-	-	-	-	-	-	-	-	-	-	-	-	-	-	-
PsCam024828	62.1223	chr2LG1	326561499	1		-	-	-	-	-	-	-	-	-	-	-	-	-	-	-	-	-	-	-	-	-	-	-	-	-	-	-	-	-	-	-	-	-	-	-	-	-	-	-	-	-	-	-	-
PsCam037897	62.1223	chr2LG1	323664998	1		-	-	-	-	-	-	-	-	-	-	-	-	-	-	-	-	-	-	-	-	-	-	-	-	-	-	-	-	-	-	-	-	-	-	-	-	-	-	-	-	-	-	-	-
PsCam050125	62.1223	chr2LG1	326805345	1		-	-	-	-	-	-	-	-	-	-	-	-	-	-	-	-	-	-	-	-	-	-	-	-	-	-	-	-	-	-	-	-	-	-	-	-	-	-	-	-	-	-	-	-
PsCam033728	62.2468	chr2LG1	330577992	1		-	-	-	-	-	-	-	-	-	-	-	-	-	-	-	-	-	-	-	-	-	-	-	-	-	-	-	-	-	-	-	-	-	-	-	-	-	-	-	-	-	-	-	-
PsCam027165	62.6167	chr2LG1	333943355	1		-	-	-	-	-	-	-	-	-	-	-	-	-	-	-	-	-	-	-	-	-	-	-	-	-	-	-	-	-	-	-	-	-	-	-	-	-	-	-	-	-	-	-	-
PsCam049163	62.6167	chr2LG1	334273995	1		-	-	-	-	-	-	-	-	-	-	-	-	-	-	-	-	-	-	-	-	-	-	-	-	-	-	-	-	-	-	-	-	-	-	-	-	-	-	-	-	-	-	-	-
PsCam034546	62.6167	chr2LG1	334568718	1		-	-	-	-	-	-	-	-	-	-	-	-	-	-	-	-	-	-	-	-	-	-	-	-	-	-	-	-	-	-	-	-	-	-	-	-	-	-	-	-	-	-	-	-
PsCam044199	62.7391	chr2LG1	334745759	1		-	-	-	-	-	-	-	-	-	-	-	-	-	-	-	-	-	-	-	-	-	-	-	-	-	-	-	-	-	-	-	-	-	-	-	-	-	-	-	-	-	-	-	-
PsCam000821	62.7391	chr2LG1	333867663	1		-	-	-	-	-	-	-	-	-	-	-	-	-	-	-	-	-	-	-	-	-	-	-	-	-	-	-	-	-	-	-	-	-	-	-	-	-	-	-	-	-	-	-	-
PsCam060244	62.7391	chr2LG1	333841442	1		-	-	-	-	-	-	-	-	-	-	-	-	-	-	-	-	-	-	-	-	-	-	-	-	-	-	-	-	-	-	-	-	-	-	-	-	-	-	-	-	-	-	-	-
PsCam050113	62.7391	chr2LG1	333769859	1		-	-	-	-	-	-	-	-	-	-	-	-	-	-	-	-	-	-	-	-	-	-	-	-	-	-	-	-	-	-	-	-	-	-	-	-	-	-	-	-	-	-	-	-
PsCam003924	62.7391	chr2LG1	334925197	1		-	-	-	-	-	-	-	-	-	-	-	-	-	-	-	-	-	-	-	-	-	-	-	-	-	-	-	-	-	-	-	-	-	-	-	-	-	-	-	-	-	-	-	-
PsCam037768	62.7391	chr2LG1	334937441	1		-	-	-	-	-	-	-	-	-	-	-	-	-	-	-	-	-	-	-	-	-	-	-	-	-	-	-	-	-	-	-	-	-	-	-	-	-	-	-	-	-	-	-	-
PsCam048574	62.7391	chr2LG1	335039187	1		-	-	-	-	-	-	-	-	-	-	-	-	-	-	-	-	-	-	-	-	-	-	-	-	-	-	-	-	-	-	-	-	-	-	-	-	-	-	-	-	-	-	-	-
PsCam039684	62.7391	chr2LG1	335120269	1		-	-	-	-	-	-	-	-	-	-	-	-	-	-	-	-	-	-	-	-	-	-	-	-	-	-	-	-	-	-	-	-	-	-	-	-	-	-	-	-	-	-	-	-
PsCam043181	62.7391	chr2LG1	335140012	1		-	-	-	-	-	-	-	-	-	-	-	-	-	-	-	-	-	-	-	-	-	-	-	-	-	-	-	-	-	-	-	-	-	-	-	-	-	-	-	-	-	-	-	-
PsCam036300	62.7391	chr2LG1	335170088	1		-	-	-	-	-	-	-	-	-	-	-	-	-	-	-	-	-	-	-	-	-	-	-	-	-	-	-	-	-	-	-	-	-	-	-	-	-	-	-	-	-	-	-	-
PsCam021036	62.7391	chr2LG1	335190012	1		-	-	-	-	-	-	-	-	-	-	-	-	-	-	-	-	-	-	-	-	-	-	-	-	-	-	-	-	-	-	-	-	-	-	-	-	-	-	-	-	-	-	-	-
PsCam021418	62.8615	chr2LG1	335558025	1		-	-	-	-	-	-	-	-	-	-	-	-	-	-	-	-	-	-	-	-	-	-	-	-	-	-	-	-	-	-	-	-	-	-	-	-	-	-	-	-	-	-	-	-
PsCam048549	62.8615	chr2LG1	335667917	1		-	-	-	-	-	-	-	-	-	-	-	-	-	-	-	-	-	-	-	-	-	-	-	-	-	-	-	-	-	-	-	-	-	-	-	-	-	-	-	-	-	-	-	-
PsCam048562	62.8615	chr2LG1	336947375	1		-	-	-	-	-	-	-	-	-	-	-	-	-	-	-	-	-	-	-	-	-	-	-	-	-	-	-	-	-	-	-	-	-	-	-	-	-	-	-	-	-	-	-	-
PsCam005835	62.8615	chr2LG1	337014833	1		-	-	-	-	-	-	-	-	-	-	-	-	-	-	-	-	-	-	-	-	-	-	-	-	-	-	-	-	-	-	-	-	-	-	-	-	-	-	-	-	-	-	-	-
PsCam043132	62.8615	chr2LG1	337021101	1		-	-	-	-	-	-	-	-	-	-	-	-	-	-	-	-	-	-	-	-	-	-	-	-	-	-	-	-	-	-	-	-	-	-	-	-	-	-	-	-	-	-	-	-
PsCam045259	63.2314	scaffold01923	5147	1		-	-	-	-	-	-	-	-	-	-	-	-	-	-	-	-	-	-	-	-	-	-	-	-	-	-	-	-	-	-	-	-	-	-	-	-	-	-	-	-	-	-	-	-
PsCam047802	63.4777	chr2LG1	338204177	1		-	-	-	-	-	-	-	-	-	-	-	-	-	-	-	-	-	-	-	-	-	-	-	-	-	-	-	-	-	-	-	-	-	-	-	-	-	-	-	-	-	-	-	-
PsCam006898	63.4777	chr2LG1	338247854	1		-	-	-	-	-	-	-	-	-	-	-	-	-	-	-	-	-	-	-	-	-	-	-	-	-	-	-	-	-	-	-	-	-	-	-	-	-	-	-	-	-	-	-	-
PsCam056951	63.4777	chr2LG1	33831108	1		-	-	-	-	-	-	-	-	-	-	-	-	-	-	-	-	-	-	-	-	-	-	-	-	-	-	-	-	-	-	-	-	-	-	-	-	-	-	-	-	-	-	-	-
PsCam045560	63.4777	chr2LG1	338402108	1		-	-	-	-	-	-	-	-	-	-	-	-	-	-	-	-	-	-	-	-	-	-	-	-	-	-	-	-	-	-	-	-	-	-	-	-	-	-	-	-	-	-	-	-
PsCam044599	64.0989	chr2LG1	339027714	1		-	-	-	-	-	-	-	-	-	-	-	-	-	-	-	-	-	-	-	-	-	-	-	-	-	-	-	-	-	-	-	-	-	-	-	-	-	-	-	-	-	-	-	-
PsCam038654	64.0989	chr2LG1	339029368	1		-	-	-	-	-	-	-	-	-	-	-	-	-	-	-	-	-	-	-	-	-	-	-	-	-	-	-	-	-	-	-	-	-	-	-	-	-	-	-	-	-	-	-	-
PsCam031865	64.2213	chr2LG1	341710646	1		-	-	-	-	-	-	-	-	-	-	-	-	-	-	-	-	-	-	-	-	-	-	-	-	-	-	-	-	-	-	-	-	-	-	-	-	-	-	-	-	-	-	-	-
PsCam039475	64.2213	chr2LG1	341683165	1		-	-	-	-	-	-	-	-	-	-	-	-	-	-	-	-	-	-	-	-	-	-	-	-	-	-	-	-	-	-	-	-	-	-	-	-	-	-	-	-	-	-	-	-
PsCam027183	64.2213	chr2LG1	340187573	1		-	-	-	-	-	-	-	-	-	-	-	-	-	-	-	-	-	-	-	-	-	-	-	-	-	-	-	-	-	-	-	-	-	-	-	-	-	-	-	-	-	-	-	-
PsCam039600	64.2213	chr2LG1	341096430	1		-	-	-	-	-	-	-	-	-	-	-	-	-	-	-	-	-	-	-	-	-	-	-	-	-	-	-	-	-	-	-	-	-	-	-	-	-	-	-	-	-	-	-	-
PsCam051007	64.2213	chr2LG1	341818193	1		-	-	-	-	-	-	-	-	-	-	-	-	-	-	-	-	-	-	-	-	-	-	-	-	-	-	-	-	-	-	-	-	-	-	-	-	-	-	-	-	-	-	-	-
PsCam048937	64.2213	chr2LG1	342260775	1		-	-	-	-	-	-	-	-	-	-	-	-	-	-	-	-	-	-	-	-	-	-	-	-	-	-	-	-	-	-	-	-	-	-	-	-	-	-	-	-	-	-	-	-
PsCam037685	64.3437	chr2LG1	343360712	1		-	-	-	-	-	-	-	-	-	-	-	-	-	-	-	-	-	-	-	-	-	-	-	-	-	-	-	-	-	-	-	-	-	-	-	-	-	-	-	-	-	-	-	-
PsCam037258	64.4661	chr2LG1	344851870	1		-	-	-	-	-	-	-	-	-	-	-	-	-	-	-	-	-	-	-	-	-	-	-	-	-	-	-	-	-	-	-	-	-	-	-	-	-	-	-	-	-	-	-	-
PsCam027866	64.4661	chr2LG1	344852702	1		-	-	-	-	-	-	-	-	-	-	-	-	-	-	-	-	-	-	-	-	-	-	-	-	-	-	-	-	-	-	-	-	-	-	-	-	-	-	-	-	-	-	-	-
PsCam042361	64.7118	chr2LG1	345466405	1		-	-	-	-	-	-	-	-	-	-	-	-	-	-	-	-	-	-	-	-	-	-	-	-	-	-	-	-	-	-	-	-	-	-	-	-	-	-	-	-	-	-	-	-
PsCam033315	64.7118	chr2LG1	343403238	1		-	-	-	-	-	-	-	-	-	-	-	-	-	-	-	-	-	-	-	-	-	-	-	-	-	-	-	-	-	-	-	-	-	-	-	-	-	-	-	-	-	-	-	-
PsCam011404	64.8392	chr2LG1	346530661	1		-	-	-	-	-	-	-	-	-	-	-	-	-	-	-	-	-	-	-	-	-	-	-	-	-	-	-	-	-	-	-	-	-	-	-	-	-	-	-	-	-	-	-	-
PsCam034560	64.9665	chr2LG1	347694389	1		-	-	-	-	-	-	-	-	-	-	-	-	-	-	-	-	-	-	-	-	-	-	-	-	-	-	-	-	-	-	-	-	-	-	-	-	-	-	-	-	-	-	-	-
PsCam036329	64.9665	chr2LG1	347735491	1		-	-	-	-	-	-	-	-	-	-	-	-	-	-	-	-	-	-	-	-	-	-	-	-	-	-	-	-	-	-	-	-	-	-	-	-	-	-	-	-	-	-	-	-
PsCam044024	64.9665	chr2LG1	349181998	1		-	-	-	-	-	-	-	-	-	-	-	-	-	-	-	-	-	-	-	-	-	-	-	-	-	-	-	-	-	-	-	-	-	-	-	-	-	-	-	-	-	-	-	-
PsCam041277	64.9665	chr2LG1	348374460	1		-	-	-	-	-	-	-	-	-	-	-	-	-	-	-	-	-	-	-	-	-	-	-	-	-	-	-	-	-	-	-	-	-	-	-	-	-	-	-	-	-	-	-	-
PsCam045988	65.4628	chr2LG1	351375660	1		-	-	-	-	-	-	-	-	-	-	-	-	-	-	-	-	-	-	-	-	-	-	-	-	-	-	-	-	-	-	-	-	-	-	-	-	-	-	-	-	-	-	-	-
PsCam002826	65.4628	chr2LG1	351867486	1		-	-	-	-	-	-	-	-	-	-	-	-	-	-	-	-	-	-	-	-	-	-	-	-	-	-	-	-	-	-	-	-	-	-	-	-	-	-	-	-	-	-	-	-
PsCam006879	65.4628	chr2LG1	350225130	1		-	-	-	-	-	-	-	-	-	-	-	-	-	-	-	-	-	-	-	-	-	-	-	-	-	-	-	-	-	-	-	-	-	-	-	-	-	-	-	-	-	-	-	-
PsCam030678	65.8327	chr2LG1	352851476	1		-	-	-	-	-	-	-	-	-	-	-	-	-	-	-	-	-	-	-	-	-	-	-	-	-	-	-	-	-	-	-	-	-	-	-	-	-	-	-	-	-	-	-	-
PsCam049332	65.8327	chr2LG1	353421881	1		-	-	-	-	-	-	-	-	-	-	-	-	-	-	-	-	-	-	-	-	-	-	-	-	-	-	-	-	-	-	-	-	-	-	-	-	-	-	-	-	-	-	-	-
PsCam037144	65.8327	chr2LG1	353594747	1		-	-	-	-	-	-	-	-	-	-	-	-	-	-	-	-	-	-	-	-	-	-	-	-	-	-	-	-	-	-	-	-	-	-	-	-	-	-	-	-	-	-	-	-
PsCam000865	65.8327	chr2LG1	353598259	1		-	-	-	-	-	-	-	-	-	-	-	-	-	-	-	-	-	-	-	-	-	-	-	-	-	-	-	-	-	-	-	-	-	-	-	-	-	-	-	-	-	-	-	-
PsCam021739	66.0797	chr2LG1	354324649	1		-	-	-	-	-	-	-	-	-	-	-	-	-	-	-	-	-	-	-	-	-	-	-	-	-	-	-	-	-	-	-	-	-	-	-	-	-	-	-	-	-	-	-	-
PsCam014194	66.0797	chr2LG1	354325305	1		-	-	-	-	-	-	-	-	-	-	-	-	-	-	-	-	-	-	-	-	-	-	-	-	-	-	-	-	-	-	-	-	-	-	-	-	-	-	-	-	-	-	-	-
PsCam046203	66.9558	chr2LG1	356843032	1		-	-	-	-	-	-	-	-	-	-	-	-	-	-	-	-	-	-	-	-	-	-	-	-	-	-	-	-	-	-	-	-	-	-	-	-	-	-	-	-	-	-	-	-
PsCam039096	67.2015	chr2LG1	358150641	1		-	-	-	-	-	-	-	-	-	-	-	-	-	-	-	-	-	-	-	-	-	-	-	-	-	-	-	-	-	-	-	-	-	-	-	-	-	-	-	-	-	-	-	-
PsCam025788	67.6965	chr2LG1	362633902	1		-	-	-	-	-	-	-	-	-	-	-	-	-	-	-	-	-	-	-	-	-	-	-	-	-	-	-	-	-	-	-	-	-	-	-	-	-	-	-	-	-	-	-	-
PsCam010212	67.6965	chr2LG1	362633246	1		-	-	-	-	-	-	-	-	-	-	-	-	-	-	-	-	-	-	-	-	-	-	-	-	-	-	-	-	-	-	-	-	-	-	-	-	-	-	-	-	-	-	-	-
PsCam050540	67.8192	chr2LG1	362838771	1		-	-	-	-	-	-	-	-	-	-	-	-	-	-	-	-	-	-	-	-	-	-	-	-	-	-	-	-	-	-	-	-	-	-	-	-	-	-	-	-	-	-	-	-
PsCam035595	67.9419	chr2LG1	362862307	1		-	-	-	-	-	-	-	-	-	-	-	-	-	-	-	-	-	-	-	-	-	-	-	-	-	-	-	-	-	-	-	-	-	-	-	-	-	-	-	-	-	-	-	-
PsCam017243	68.0643	chr2LG1	362961706	1		-	-	-	-	-	-	-	-	-	-	-	-	-	-	-	-	-	-	-	-	-	-	-	-	-	-	-	-	-	-	-	-	-	-	-	-	-	-	-	-	-	-	-	-
PsCam054720	68.0643	chr2LG1	362977572	1		-	-	-	-	-	-	-	-	-	-	-	-	-	-	-	-	-	-	-	-	-	-	-	-	-	-	-	-	-	-	-	-	-	-	-	-	-	-	-	-	-	-	-	-
PsCam056780	68.4342	chr2LG1	363978400	1		-	-	-	-	-	-	-	-	-	-	-	-	-	-	-	-	-	-	-	-	-	-	-	-	-	-	-	-	-	-	-	-	-	-	-	-	-	-	-	-	-	-	-	-
PsCam003687	68.4342	chr2LG1	364068435	1		-	-	-	-	-	-	-	-	-	-	-	-	-	-	-	-	-	-	-	-	-	-	-	-	-	-	-	-	-	-	-	-	-	-	-	-	-	-	-	-	-	-	-	-
PsCam051301	68.4342	chr2LG1	364070208	1		-	-	-	-	-	-	-	-	-	-	-	-	-	-	-	-	-	-	-	-	-	-	-	-	-	-	-	-	-	-	-	-	-	-	-	-	-	-	-	-	-	-	-	-
PsCam002213	68.4342	chr2LG1	363708344	1		-	-	-	-	-	-	-	-	-	-	-	-	-	-	-	-	-	-	-	-	-	-	-	-	-	-	-	-	-	-	-	-	-	-	-	-	-	-	-	-	-	-	-	-
PsCam042713	68.806	chr2LG1	363660085	1		-	-	-	-	-	-	-	-	-	-	-	-	-	-	-	-	-	-	-	-	-	-	-	-	-	-	-	-	-	-	-	-	-	-	-	-	-	-	-	-	-	-	-	-
PsCam005313	69.1777	chr2LG1	367001153	1		-	-	-	-	-	-	-	-	-	-	-	-	-	-	-	-	-	-	-	-	-	-	-	-	-	-	-	-	-	-	-	-	-	-	-	-	-	-	-	-	-	-	-	-
PsCam038196	69.6753	chr2LG1	367925838	1		-	-	-	-	-	-	-	-	-	-	-	-	-	-	-	-	-	-	-	-	-	-	-	-	-	-	-	-	-	-	-	-	-	-	-	-	-	-	-	-	-	-	-	-
PsCam020896	69.7977	chr2LG1	368032285	1		-	-	-	-	-	-	-	-	-	-	-	-	-	-	-	-	-	-	-	-	-	-	-	-	-	-	-	-	-	-	-	-	-	-	-	-	-	-	-	-	-	-	-	-
PsCam043062	70.2927	chr2LG1	370111072	1		-	-	-	-	-	-	-	-	-	-	-	-	-	-	-	-	-	-	-	-	-	-	-	-	-	-	-	-	-	-	-	-	-	-	-	-	-	-	-	-	-	-	-	-
PsCam046809	70.2927	chr2LG1	369633407	1		-	-	-	-	-	-	-	-	-	-	-	-	-	-	-	-	-	-	-	-	-	-	-	-	-	-	-	-	-	-	-	-	-	-	-	-	-	-	-	-	-	-	-	-
PsCam000640	70.4151	chr2LG1	369771764	1		-	-	-	-	-	-	-	-	-	-	-	-	-	-	-	-	-	-	-	-	-	-	-	-	-	-	-	-	-	-	-	-	-	-	-	-	-	-	-	-	-	-	-	-
PsCam038992	70.4151	chr2LG1	368300899	1		-	-	-	-	-	-	-	-	-	-	-	-	-	-	-	-	-	-	-	-	-	-	-	-	-	-	-	-	-	-	-	-	-	-	-	-	-	-	-	-	-	-	-	-
PsCam028096	70.4151	chr2LG1	368324496	1		-	-	-	-	-	-	-	-	-	-	-	-	-	-	-	-	-	-	-	-	-	-	-	-	-	-	-	-	-	-	-	-	-	-	-	-	-	-	-	-	-	-	-	-
PsCam016250	70.4151	chr2LG1	368336522	1		-	-	-	-	-	-	-	-	-	-	-	-	-	-	-	-	-	-	-	-	-	-	-	-	-	-	-	-	-	-	-	-	-	-	-	-	-	-	-	-	-	-	-	-
PsCam018769	70.5375	chr2LG1	369470847	1		-	-	-	-	-	-	-	-	-	-	-	-	-	-	-	-	-	-	-	-	-	-	-	-	-	-	-	-	-	-	-	-	-	-	-	-	-	-	-	-	-	-	-	-
PsCam035452	70.5375	chr2LG1	370270045	1		-	-	-	-	-	-	-	-	-	-	-	-	-	-	-	-	-	-	-	-	-	-	-	-	-	-	-	-	-	-	-	-	-	-	-	-	-	-	-	-	-	-	-	-
PsCam038058	70.5375	chr2LG1	370414908	1		-	-	-	-	-	-	-	-	-	-	-	-	-	-	-	-	-	-	-	-	-	-	-	-	-	-	-	-	-	-	-	-	-	-	-	-	-	-	-	-	-	-	-	-
PsCam042702	70.7838	chr2LG1	370542317	1		-	-	-	-	-	-	-	-	-	-	-	-	-	-	-	-	-	-	-	-	-	-	-	-	-	-	-	-	-	-	-	-	-	-	-	-	-	-	-	-	-	-	-	-
PsCam056543	71.4065	chr2LG1	372156084	1		-	-	-	-	-	-	-	-	-	-	-	-	-	-	-	-	-	-	-	-	-	-	-	-	-	-	-	-	-	-	-	-	-	-	-	-	-	-	-	-	-	-	-	-
PsCam051955	72.5415	chr2LG1	374050969	1		-	-	-	-	-	-	-	-	-	-	-	-	-	-	-	-	-	-	-	-	-	-	-	-	-	-	-	-	-	-	-	-	-	-	-	-	-	-	-	-	-	-	-	-
PsCam052573	72.5415	chr2LG1	374159447	1		-	-	-	-	-	-	-	-	-	-	-	-	-	-	-	-	-	-	-	-	-	-	-	-	-	-	-	-	-	-	-	-	-	-	-	-	-	-	-	-	-	-	-	-
PsCam027164	72.5415	chr2LG1	374274783	1		-	-	-	-	-	-	-	-	-	-	-	-	-	-	-	-	-	-	-	-	-	-	-	-	-	-	-	-	-	-	-	-	-	-	-	-	-	-	-	-	-	-	-	-
PsCam048794	73.2878	chr2LG1	375068445	1		-	-	-	-	-	-	-	-	-	-	-	-	-	-	-	-	-	-	-	-	-	-	-	-	-	-	-	-	-	-	-	-	-	-	-	-	-	-	-	-	-	-	-	-
PsCam004655	73.2878	chr2LG1	374975865	1		-	-	-	-	-	-	-	-	-	-	-	-	-	-	-	-	-	-	-	-	-	-	-	-	-	-	-	-	-	-	-	-	-	-	-	-	-	-	-	-	-	-	-	-
PsCam042689	73.4102	chr2LG1	374943881	1		-	-	-	-	-	-	-	-	-	-	-	-	-	-	-	-	-	-	-	-	-	-	-	-	-	-	-	-	-	-	-	-	-	-	-	-	-	-	-	-	-	-	-	-
PsCam000444	73.6559	chr2LG1	374430793	1		-	-	-	-	-	-	-	-	-	-	-	-	-	-	-	-	-	-	-	-	-	-	-	-	-	-	-	-	-	-	-	-	-	-	-	-	-	-	-	-	-	-	-	-
PsCam015178	74.1497	chr2LG1	376407614	1		-	-	-	-	-	-	-	-	-	-	-	-	-	-	-	-	-	-	-	-	-	-	-	-	-	-	-	-	-	-	-	-	-	-	-	-	-	-	-	-	-	-	-	-
PsCam051836	74.1497	chr2LG1	379324913	1		-	-	-	-	-	-	-	-	-	-	-	-	-	-	-	-	-	-	-	-	-	-	-	-	-	-	-	-	-	-	-	-	-	-	-	-	-	-	-	-	-	-	-	-
PsCam004267	74.5187	chr2LG1	378448070	1		-	-	-	-	-	-	-	-	-	-	-	-	-	-	-	-	-	-	-	-	-	-	-	-	-	-	-	-	-	-	-	-	-	-	-	-	-	-	-	-	-	-	-	-
PsCam038851	74.5187	chr2LG1	379664826	1		-	-	-	-	-	-	-	-	-	-	-	-	-	-	-	-	-	-	-	-	-	-	-	-	-	-	-	-	-	-	-	-	-	-	-	-	-	-	-	-	-	-	-	-
PsCam035273	74.5187	chr2LG1	379464795	1		-	-	-	-	-	-	-	-	-	-	-	-	-	-	-	-	-	-	-	-	-	-	-	-	-	-	-	-	-	-	-	-	-	-	-	-	-	-	-	-	-	-	-	-
PsCam046830	74.5187	chr2LG1	378582881	1		-	-	-	-	-	-	-	-	-	-	-	-	-	-	-	-	-	-	-	-	-	-	-	-	-	-	-	-	-	-	-	-	-	-	-	-	-	-	-	-	-	-	-	-
PsCam034587	74.5187	chr2LG1	380408221	1		-	-	-	-	-	-	-	-	-	-	-	-	-	-	-	-	-	-	-	-	-	-	-	-	-	-	-	-	-	-	-	-	-	-	-	-	-	-	-	-	-	-	-	-
PsCam036923	74.5187	chr2LG1	378810204	1		-	-	-	-	-	-	-	-	-	-	-	-	-	-	-	-	-	-	-	-	-	-	-	-	-	-	-	-	-	-	-	-	-	-	-	-	-	-	-	-	-	-	-	-
PsCam038075	74.9972	chr2LG1	380990984	1		K	K	K	K	E	E	K	K	E	E	E	E	K	E	E	E	K	K	K	E	K	K	K	E	E	K	K	E	K	K	K	K	E	E	E	K	K	K	E	E	E	E	E	E
PsCam048128	75.1178	chr2LG1	337170516	1		K	K	K	K	E	E	K	K	E	E	E	E	K	E	E	K	K	K	K	E	K	K	K	E	E	K	K	E	K	K	K	K	E	E	E	K	K	K	E	E	E	E	E	E
PsCam000313	75.1178	chr2LG1	381171454	1		K	K	K	K	E	E	K	K	E	E	E	E	K	E	E	K	K	K	K	E	K	K	K	E	E	K	K	E	K	K	K	K	E	E	E	K	K	K	E	E	E	E	E	E
PsCam048842	75.1178	chr2LG1	381183132	1		K	K	K	K	E	E	K	K	E	E	E	E	K	E	E	K	K	K	K	E	K	K	K	E	E	K	K	E	K	K	K	K	E	E	E	K	K	K	E	E	E	E	E	E
PsCam049042	75.1178	chr2LG1	337242447	1		-	-	-	-	-	-	-	-	-	-	-	-	-	-	-	-	-	-	-	-	-	-	-	-	-	-	-	-	-	-	-	-	-	-	-	-	-	-	-	-	-	-	-	-
PsCam011019	75.1178	chr2LG1	381481460	1		K	K	K	K	E	E	K	K	E	E	E	E	K	E	E	K	K	K	K	E	K	K	K	E	E	K	K	E	K	K	K	K	E	E	E	K	K	K	E	E	E	E	E	E
PsCam055342	75.1178	chr2LG1	381531664	1		-	-	-	-	-	-	-	-	-	-	-	-	-	-	-	-	-	-	-	-	-	-	-	-	-	-	-	-	-	-	-	-	-	-	-	-	-	-	-	-	-	-	-	-
PsCam031915	75.1178	chr2LG1	381667625	1		-	-	-	-	-	-	-	-	-	-	-	-	-	-	-	-	-	-	-	-	-	-	-	-	-	-	-	-	-	-	-	-	-	-	-	-	-	-	-	-	-	-	-	-
PsCam043426	75.1178	chr2LG1	381988310	1		K	K	K	K	E	E	K	K	E	E	E	E	K	E	E	K	K	K	K	E	K	K	K	E	E	K	K	E	K	K	K	K	E	E	E	E	K	K	E	E	E	E	E	E
PsCam005408	75.1178	chr2LG1	382214629	1		K	K	K	K	E	E	K	K	E	E	E	E	K	E	E	K	K	K	K	E	K	K	K	E	E	K	K	E	K	K	K	K	E	E	E	E	K	K	E	E	E	E	E	E
PsCam044815	75.1178	chr2LG1	382248496	1		K	K	K	K	E	E	K	K	E	E	E	E	K	E	E	K	K	K	K	E	K	K	K	E	E	K	K	E	K	K	K	K	E	E	E	E	K	K	E	E	E	E	E	E
PsCam027591	75.1178	chr2LG1	382314111	1		K	K	K	K	E	E	K	K	E	E	E	E	K	E	E	K	K	K	K	E	K	K	K	E	E	K	K	E	K	K	K	K	E	E	E	E	K	K	E	E	E	E	E	E
PsCam028211	75.1178	chr2LG1	382323189	1		K	K	K	K	E	E	K	K	E	E	E	E	K	E	E	K	K	K	K	E	K	K	K	E	E	K	K	E	K	K	K	K	E	E	E	E	K	K	E	E	E	E	E	E
PsCam042798	75.1178	chr2LG1	382324816	1		K	K	K	K	E	E	K	K	E	E	E	E	K	E	E	K	K	K	K	E	K	K	K	E	E	K	K	E	K	K	K	K	E	E	E	E	K	K	E	E	E	E	E	E
PsCam051050	75.1178	chr2LG1	382433714	1		K	K	K	K	E	E	K	K	E	E	E	E	K	E	E	K	K	K	K	E	K	K	K	E	E	K	K	E	K	K	K	K	E	E	E	E	K	K	E	E	E	E	E	E
PsCam025507	75.1178	chr2LG1	382459993	1		K	K	K	K	E	E	K	K	E	E	E	E	K	E	E	K	K	K	K	E	K	K	K	E	E	K	K	E	K	K	K	K	E	E	E	E	K	K	E	E	E	E	E	E
PsCam044335	75.1178	chr2LG1	382491025	1		K	K	K	K	E	E	K	K	E	E	E	E	K	E	E	K	K	K	K	E	K	K	K	E	E	K	K	E	K	K	K	K	E	E	E	E	K	K	E	E	E	E	E	E
PsCam002303	75.1178	chr2LG1	382757161	1		K	K	K	K	E	E	K	K	E	E	E	E	K	E	E	K	K	K	K	E	K	K	K	E	E	K	K	E	K	K	K	K	E	E	E	E	K	K	E	E	E	E	E	E
PsCam010210	75.1178	chr2LG1	382759881	1		K	K	K	K	E	E	K	K	E	E	E	E	K	E	E	K	K	K	K	E	K	K	K	E	E	K	K	E	K	K	K	K	E	E	E	E	K	K	E	E	E	E	E	E
PsCam046314	75.1178	chr2LG1	382679999	1		K	K	K	K	E	E	K	K	E	E	E	E	K	E	E	K	K	K	K	E	K	K	K	E	E	K	K	E	K	K	K	K	E	E	E	E	K	K	E	E	E	E	E	E
PsCam042717	75.1178	chr2LG1	382875198	1		-	-	-	-	-	-	-	-	-	-	-	-	-	-	-	-	-	-	-	-	-	-	-	-	-	-	-	-	-	-	-	-	-	-	-	-	-	-	-	-	-	-	-	-
PsCam053021	75.1178	chr2LG1	382702032	1		K	K	K	K	E	E	K	K	E	E	E	E	K	E	E	K	K	K	K	E	K	K	K	E	E	K	K	E	K	K	K	K	E	E	E	E	K	K	E	E	E	E	E	E
PsCam013331	75.1178	chr2LG1	383051389	1		-	-	-	-	-	-	-	-	-	-	-	-	-	-	-	-	-	-	-	-	-	-	-	-	-	-	-	-	-	-	-	-	-	-	-	-	-	-	-	-	-	-	-	-
PsCam056820	75.628	chr2LG1	383244327	1		-	-	-	-	-	-	-	-	-	-	-	-	-	-	-	-	-	-	-	-	-	-	-	-	-	-	-	-	-	-	-	-	-	-	-	-	-	-	-	-	-	-	-	-
PsCam057677	75.628	chr2LG1	383330361	1		K	K	K	K	E	E	K	K	E	K	E	E	K	E	E	K	K	K	K	E	K	K	K	E	E	K	K	E	K	K	K	K	E	E	E	E	K	K	E	E	E	E	E	E
PsCam033953	75.7525	chr2LG1	383463566	1		K	K	K	K	E	E	K	K	E	K	E	E	K	E	E	K	K	K	K	E	K	K	K	E	E	K	K	E	K	K	K	K	E	E	E	E	K	K	E	E	E	E	E	E
PsCam006768	75.7525	chr2LG1	383639943	1		K	K	K	K	E	E	K	K	E	K	E	E	K	E	E	K	K	K	K	E	K	K	K	E	E	K	K	E	K	K	K	K	E	E	E	E	K	K	E	E	E	E	E	E
PsCam037001	76.514	chr2LG1	385263985	1		K	K	K	E	E	E	K	K	E	K	E	E	K	E	E	K	K	K	K	E	K	K	K	E	E	K	K	E	K	K	K	K	E	E	E	E	K	K	E	E	E	E	E	E
PsCam036227	76.6385	chr2LG1	385842045	1		K	K	K	E	E	E	K	K	E	K	E	E	K	E	E	K	K	K	K	E	K	K	K	E	E	K	K	E	K	K	K	K	E	E	E	E	K	K	E	E	E	E	E	E
PsCam046459	76.763	chr2LG1	385949470	1		K	K	K	E	E	E	K	K	E	K	E	E	K	E	E	K	K	K	K	E	K	K	K	E	E	K	K	E	K	K	K	K	E	E	E	E	K	K	E	E	E	E	E	E
PsCam050791	76.763	chr2LG1	386007758	1		K	K	K	E	E	E	K	K	E	K	E	E	K	E	E	K	K	K	K	E	K	K	K	E	E	K	K	E	K	K	K	K	E	E	E	E	K	K	E	E	E	E	E	E
PsCam043389	77.0162	chr2LG1	386250120	1		K	K	K	E	E	E	K	K	E	K	E	E	K	E	E	K	K	K	K	E	K	K	K	E	E	K	K	E	K	K	K	K	E	E	E	E	K	K	E	E	E	E	E	E
PsCam001639	77.0162	chr2LG1	386252844	1		K	K	K	E	E	E	K	K	E	K	E	E	K	E	E	K	K	K	K	E	K	K	K	E	E	K	K	E	K	K	K	K	E	E	E	E	K	K	E	E	E	E	E	E
PsCam035540	77.0162	chr2LG1	386416650	1		K	K	K	E	E	E	K	K	E	K	E	E	K	E	E	K	K	K	K	E	K	K	K	E	E	K	K	E	K	K	K	K	E	E	E	E	K	K	E	E	E	E	E	E
PsCam043595	78.0634	chr2LG1	387068711	1		K	K	K	E	E	E	K	K	E	K	E	E	K	E	E	K	K	K	K	E	K	K	K	E	E	K	K	E	K	K	K	K	E	E	E	E	K	K	E	E	E	E	E	E
PsCam040975	78.0634	chr2LG1	387147747	1		K	K	K	E	E	E	K	K	E	K	E	E	K	E	E	K	K	K	K	E	K	K	K	E	E	K	K	E	K	K	K	K	E	E	E	E	K	K	E	E	E	E	E	E
PsCam049639	78.1907	chr2LG1	387250594	1		K	K	K	E	E	E	K	K	E	K	E	E	K	E	E	K	K	K	K	E	K	K	K	E	E	K	K	E	K	K	K	K	E	E	E	E	K	K	E	K	E	E	E	E
PsCam038229	79.2164	chr2LG1	388468554	1		K	K	K	E	E	E	K	K	K	K	E	E	K	E	E	K	K	K	K	E	K	K	K	E	E	K	K	E	K	K	K	K	E	E	E	E	K	K	E	K	E	E	E	E
PsCam044975	104.816	chr2LG1	416063008	1		K	K	E	E	K	K	K	K	K	K	E	-	E	K	E	K	K	K	K	E	K	K	K	K	E	E	K	E	K	K	K	E	K	E	K	E	K	E	K	K	E	E	E	E
PsCam033980	105.068	chr2LG1	416625879	1		K	K	E	E	K	K	K	K	K	K	E	E	E	K	E	K	K	K	K	E	K	K	K	K	E	E	K	E	K	K	K	E	K	E	K	E	K	E	K	K	E	E	E	E
PsCam048460	105.068	chr2LG1	416674871	1		K	K	E	E	K	K	K	K	K	K	E	-	E	K	E	K	K	K	K	E	K	K	K	K	E	E	K	E	K	K	K	E	K	E	K	E	K	E	K	K	E	E	E	E
PsCam013007	105.068	chr2LG1	417171069	1		K	K	E	E	K	K	K	K	K	K	E	-	E	K	E	K	K	K	K	E	K	K	K	K	E	E	K	E	K	K	K	E	K	E	K	E	K	E	K	K	E	E	E	E
PsCam049598	105.068	chr2LG1	417216172	1		K	K	E	E	K	K	K	K	K	K	E	E	E	K	E	K	K	K	K	E	K	K	K	K	E	E	K	E	K	K	K	E	K	E	K	E	K	E	K	K	E	E	E	E
PsCam037581	105.068	chr2LG1	417381382	1		K	K	E	E	K	K	K	K	K	K	E	-	E	K	E	K	K	K	K	E	K	K	K	K	E	E	K	E	K	K	K	E	K	E	K	E	K	E	K	K	E	E	E	E
PsCam047708	105.194	chr2LG1	417596746	1		K	K	E	E	K	K	E	K	K	K	E	-	E	K	E	K	K	K	K	E	K	K	K	K	E	E	K	E	K	K	K	E	K	E	K	E	K	E	K	K	E	E	E	E
PsCam010932	105.194	chr2LG1	417713800	1		K	K	E	E	K	K	E	K	K	K	E	-	E	K	E	K	K	K	K	E	K	K	K	K	E	E	K	E	K	K	K	E	K	E	K	E	K	E	K	K	E	E	E	E
PsCam004478	105.194	chr2LG1	417046459	1		K	K	E	E	K	K	E	K	K	K	E	-	E	K	E	K	K	K	K	E	K	K	K	K	E	E	K	E	K	K	K	E	K	E	K	E	K	E	K	K	E	E	E	E
PsCam034544	105.194	chr2LG1	417051357	1		K	K	E	E	K	K	E	K	K	K	E	-	E	K	E	K	K	K	K	E	K	K	K	K	E	E	K	E	K	K	K	E	K	E	K	E	K	E	K	K	E	E	E	E
PsCam033768	105.194	scaffold01985	50671	1		K	K	E	E	K	K	E	K	K	K	E	-	E	K	E	K	K	K	K	E	K	K	K	K	E	E	K	E	K	K	K	E	K	E	K	E	K	E	K	K	E	E	E	E
PsCam006724	105.318	chr2LG1	417984019	1		K	K	E	E	K	K	E	K	K	K	E	-	E	K	E	K	K	K	K	E	K	K	K	K	E	E	K	E	K	K	K	E	K	E	K	E	K	E	K	K	E	E	E	E
PsCam037137	105.318	chr2LG1	418284595	1		K	K	E	E	K	K	E	K	K	K	E	E	E	K	E	K	K	K	K	E	K	K	K	K	E	E	K	E	K	K	K	E	K	E	K	E	K	E	K	K	E	E	E	E
PsCam049860	105.318	chr2LG1	418338738	1		K	K	E	E	K	K	E	K	K	K	E	E	E	K	E	K	K	K	K	E	K	K	K	K	E	E	K	E	K	K	K	E	K	E	K	E	K	E	K	K	E	E	E	E
PsCam044296	105.318	chr2LG1	418345547	1		K	K	E	E	K	K	E	K	K	K	E	-	E	K	E	K	K	K	K	E	K	K	K	K	E	E	K	E	K	K	K	E	K	E	K	E	K	E	K	K	E	E	E	E
PsCam005033	105.318	chr2LG1	418419149	1		-	-	-	-	-	-	-	-	-	-	-	-	-	-	-	-	-	-	-	-	-	-	-	-	-	-	-	-	-	-	-	-	-	-	-	-	-	-	-	-	-	-	-	-
PsCam042815	105.318	chr2LG1	418455289	1		K	K	E	E	K	K	E	K	K	K	E	-	E	K	E	K	K	K	K	E	K	K	K	K	E	E	K	E	K	K	K	E	K	E	K	E	K	E	K	K	E	E	E	E
PsCam027153	105.318	chr2LG1	418472257	1		K	K	E	E	K	K	E	K	K	K	E	-	E	K	E	K	K	K	K	E	K	K	K	K	E	E	K	E	K	K	K	E	K	E	K	E	K	E	K	K	E	E	E	E
PsCam038088	105.318	chr2LG1	418545109	1		K	K	E	E	K	K	E	K	K	K	E	E	E	K	E	K	K	K	K	E	K	K	K	K	E	E	K	E	K	K	K	E	K	E	K	E	K	E	K	K	E	E	E	E
PsCam043663	105.586	chr2LG1	419037220	1		K	K	-	-	K	K	E	K	K	K	-	-	-	K	E	K	K	K	K	-	K	K	K	K	E	E	K	-	K	K	K	E	K	E	K	-	K	-	K	K	E	-	-	-
PsCam037259	105.719	chr2LG1	419062862	1		K	K	E	E	K	K	E	K	K	K	E	-	E	K	E	K	K	K	K	E	K	K	K	K	E	E	K	E	K	K	K	E	K	E	K	E	K	E	K	K	E	E	E	E
PsCam045496	105.719	chr2LG1	419145167	1		K	K	E	E	K	K	E	K	K	K	E	-	E	K	E	K	K	K	K	E	K	K	K	K	E	E	K	E	K	K	K	E	K	E	K	E	K	E	K	K	E	E	E	E
PsCam044057	105.719	chr2LG1	419145607	1		K	K	E	E	K	K	E	K	K	K	E	-	E	K	E	K	K	K	K	E	K	K	K	K	E	E	K	E	K	K	K	E	K	E	K	E	K	E	K	K	E	E	E	E
PsCam048467	106.219	chr2LG1	419510325	1		K	E	E	E	K	K	E	K	K	K	E	-	E	K	E	K	K	K	K	E	K	K	K	K	E	E	K	E	K	K	K	E	K	E	K	E	K	E	K	K	E	E	E	E
PsCam038160	106.467	chr2LG1	419531282	1		K	E	E	E	K	K	E	K	K	K	E	-	E	K	E	K	K	K	K	E	K	K	K	K	E	E	K	E	K	K	K	E	K	E	K	E	K	E	K	K	E	E	E	E
PsCam044835	106.592	chr2LG1	419557580	1		K	E	E	E	K	K	E	K	K	K	E	-	E	K	E	K	K	K	K	E	K	K	K	K	E	E	K	E	K	K	K	E	K	E	K	E	K	E	K	K	E	E	E	E
PsCam044855	106.592	chr2LG1	419560368	1		K	E	E	E	K	K	E	K	K	K	E	E	E	K	E	K	K	K	K	E	K	K	K	K	E	E	K	E	K	K	K	E	K	E	K	E	K	E	K	K	E	E	E	E
PsCam059295	106.592	chr2LG1	420162792	1		K	E	E	E	K	K	E	K	K	K	E	E	E	K	E	K	K	K	K	E	K	K	K	K	E	E	K	E	K	K	K	E	K	E	K	E	K	E	K	K	E	E	E	E
PsCam011366	106.592	chr2LG1	420163967	1		K	E	E	E	K	K	E	K	K	K	E	-	E	K	E	K	K	K	K	E	K	K	K	K	E	E	K	E	K	K	K	E	K	E	K	E	K	E	K	K	E	E	E	E
PsCam035316	106.843	chr2LG1	420461966	1		K	E	E	E	K	K	E	K	K	K	E	E	E	K	E	K	K	K	K	E	K	K	K	K	E	E	K	E	K	K	K	E	K	E	K	E	K	E	K	K	E	E	E	E
PsCam034659	107.22	chr2LG1	421367979	1		K	E	E	E	K	K	E	K	K	K	E	-	E	K	E	K	K	K	K	E	K	K	K	K	E	E	K	E	K	K	K	E	K	E	K	E	K	E	K	K	E	E	E	E
PsCam035496	107.22	scaffold03839	33457	1		K	E	E	E	K	K	E	K	K	K	E	-	E	K	E	K	K	K	K	E	K	K	K	K	E	E	K	E	K	K	K	E	K	E	K	E	K	E	K	K	E	E	E	E
PsCam000507	107.22	scaffold00748	38719	1		K	E	E	E	K	K	E	K	K	K	E	-	E	K	E	K	K	K	K	E	K	K	K	K	E	E	K	E	K	K	K	E	K	E	K	E	K	E	K	K	E	E	E	E
PsCam048290	107.22	chr2LG1	421631807	1		K	E	E	E	K	K	E	K	K	K	E	E	E	K	E	K	K	K	K	E	K	K	K	K	E	E	K	E	K	K	K	E	K	E	K	E	K	E	K	K	E	E	E	E
PsCam042853	107.22	chr2LG1	421587596	1		K	E	E	E	K	K	E	K	K	K	E	E	E	K	E	K	K	K	K	E	K	K	K	K	E	E	K	E	K	K	K	E	K	E	K	E	K	E	K	K	E	E	E	E
PsCam020906	107.22	chr2LG1	421508039	1		K	E	E	E	K	K	E	K	K	K	E	-	E	K	E	K	K	K	K	E	K	K	K	K	E	E	K	E	K	K	K	E	K	E	K	E	K	E	K	K	E	E	E	E
PsCam056019	107.22	chr2LG1	421436436	1		K	E	E	E	K	K	E	K	K	K	E	E	E	K	E	K	K	K	K	E	K	K	K	K	E	E	K	E	K	K	K	E	K	E	K	E	K	E	K	K	E	E	E	E
PsCam051780	107.356	chr2LG1	422792157	1		K	E	E	E	K	K	E	K	K	K	E	-	E	K	E	K	K	K	K	E	K	K	K	K	E	E	K	E	K	K	K	E	K	E	K	E	K	E	K	K	E	E	E	-
PsCam000400	107.492	chr2LG1	422207077	1		K	E	E	E	K	K	E	K	K	K	E	-	E	K	E	K	K	K	K	E	K	K	K	K	E	E	K	E	K	K	K	E	K	E	K	E	K	E	K	K	E	E	E	E
PsCam050435	107.87	chr2LG1	422296869	1		K	E	E	E	K	K	E	K	K	K	E	E	E	K	E	K	K	K	K	E	K	K	K	K	E	E	K	E	K	K	K	E	K	E	E	E	K	E	K	K	E	E	E	E
PsCam050148	108.121	chr2LG1	422491307	1		K	E	E	E	K	K	E	K	K	K	E	-	E	K	E	K	K	K	K	E	K	K	K	K	E	E	K	E	K	K	K	E	K	E	E	E	K	E	K	K	E	E	E	E
PsCam045585	108.121	chr2LG1	422944942	1		K	E	E	E	K	K	E	K	K	K	E	-	E	K	E	K	K	K	K	E	K	K	K	K	E	E	K	E	K	K	K	E	K	E	E	E	K	E	K	K	E	E	E	E
PsCam036520	108.246	chr2LG1	422648034	1		K	E	E	E	K	K	E	K	K	K	E	E	E	K	E	K	K	K	K	E	K	K	K	K	E	E	K	E	K	K	K	E	K	E	E	E	K	E	K	K	E	E	E	E
PsCam029232	108.879	chr2LG1	423220334	1		K	E	E	E	K	K	E	K	K	K	E	-	E	K	E	K	K	K	K	E	K	K	K	K	E	E	K	E	K	K	K	E	K	E	E	E	K	E	K	K	E	E	E	E
PsCam057632	109.13	chr2LG1	423378065	1		K	E	E	E	K	K	E	K	K	K	E	E	E	K	E	K	K	K	K	E	K	K	K	K	E	E	K	E	K	K	K	E	K	E	E	E	K	E	K	K	E	E	E	E
PsCam029322	109.378	chr2LG1	424013921	1		K	E	E	E	K	K	E	K	K	K	E	E	E	K	E	K	K	K	K	E	E	K	K	K	E	E	K	E	K	K	K	E	K	E	E	E	K	E	K	K	E	E	E	E
PsCam037939	109.378	chr2LG1	424034159	1		K	E	E	E	K	K	E	K	K	K	E	E	E	K	E	K	K	K	K	E	E	K	K	K	E	E	K	E	K	K	K	E	K	E	E	E	K	E	K	K	E	E	E	-
PsCam042585	109.378	scaffold01223	49617	1		K	E	E	E	K	K	E	K	K	K	E	-	E	K	E	K	K	K	K	E	E	K	K	K	E	E	K	E	K	K	K	E	K	E	E	E	K	E	K	K	E	E	E	E
PsCam043261	109.378	chr2LG1	424697967	1		K	E	E	E	K	K	E	K	K	K	E	E	E	K	E	K	K	K	K	E	E	K	K	K	E	E	K	E	K	K	K	E	K	E	E	E	K	E	K	K	E	E	E	E
PsCam049440	109.378	chr2LG1	424707361	1		K	E	E	E	K	K	E	K	K	K	E	E	E	K	E	K	K	K	K	E	E	K	K	K	E	E	K	E	K	K	K	E	K	E	E	E	K	E	K	K	E	E	E	E
PsCam049025	109.503	chr2LG1	424230605	1		K	E	E	E	K	K	E	K	K	K	E	-	E	K	E	K	K	K	K	E	E	K	K	K	E	E	K	E	K	K	K	E	K	E	E	E	K	E	K	K	E	E	E	E
PsCam050221	109.88	chr2LG1	424911836	1		K	E	E	E	K	K	E	K	K	K	E	-	E	K	E	K	K	K	K	E	E	K	K	K	E	E	K	E	K	K	K	E	K	E	E	E	K	E	K	K	E	E	E	E
PsCam035380	109.88	chr2LG1	424943191	1		K	E	E	E	K	K	E	K	K	K	E	-	E	K	E	K	K	K	K	E	E	K	K	K	E	E	K	E	K	K	K	E	K	E	E	E	K	E	K	K	E	E	E	E
PsCam036601	109.88	chr2LG1	424992150	1		K	E	E	E	K	K	E	K	K	K	E	-	E	K	E	K	K	K	K	E	E	K	K	K	E	E	K	E	K	K	K	E	K	E	E	E	K	E	K	K	E	E	E	E
PsCam005449	109.88	chr2LG1	424996471	1		K	E	E	E	K	K	E	K	K	K	E	-	E	K	E	K	K	K	K	E	E	K	K	K	E	E	K	E	K	K	K	E	K	E	E	E	K	E	K	K	E	E	E	E
PsCam050857	109.88	chr2LG1	425167299	1		K	E	E	E	K	K	E	K	K	K	E	E	E	K	E	K	K	K	K	E	E	K	K	K	E	E	K	E	K	K	K	E	K	E	E	E	K	E	K	K	E	E	E	E
PsCam035570	109.88	chr2LG1	425178394	1		K	E	E	E	K	K	E	K	K	K	E	-	E	K	E	K	K	K	K	E	E	K	K	K	E	E	K	E	K	K	K	E	K	E	E	E	K	E	K	K	E	E	E	E
PsCam045942	110.005	chr2LG1	425230587	1		K	E	E	E	K	K	E	K	K	K	E	-	E	K	E	K	K	K	K	E	E	K	K	K	E	E	K	E	K	K	K	E	K	E	E	E	K	E	K	K	E	E	E	E
PsCam037232	110.005	scaffold00769	37413	1		K	E	E	E	K	K	E	K	K	K	E	-	E	K	E	K	K	K	K	E	E	K	K	K	E	E	K	E	K	K	K	E	K	E	E	E	K	E	K	K	E	E	E	E
		chromosome	position	lg II		1001	1002	1003	1004	1005	1006	1008	1009	1010	1011	1012	1014	1015	1017	1018	1020	1021	1022	1023	1024	1025	1026	1027	1028	1029	1030	1031	1032	1033	1034	1035	1036	1037	1038	1039	1040	1041	1042	1043	1044	1045	1047	1048	1049
PsCam039399	0	chr6LG2	14168	2		-	-	-	-	-	-	-	-	-	-	-	-	-	-	-	-	-	-	-	-	-	-	-	-	-	-	-	-	-	-	-	-	-	-	-	-	-	-	-	-	-	-	-	-
PsCam045546	0.4938	chr6LG2	894645	2		-	-	-	-	-	-	-	-	-	-	-	-	-	-	-	-	-	-	-	-	-	-	-	-	-	-	-	-	-	-	-	-	-	-	-	-	-	-	-	-	-	-	-	-
PsCam044347	0.6184	chr6LG2	850973	2		-	-	-	-	-	-	-	-	-	-	-	-	-	-	-	-	-	-	-	-	-	-	-	-	-	-	-	-	-	-	-	-	-	-	-	-	-	-	-	-	-	-	-	-
PsCam005806	0.6184	chr6LG2	486559	2		-	-	-	-	-	-	-	-	-	-	-	-	-	-	-	-	-	-	-	-	-	-	-	-	-	-	-	-	-	-	-	-	-	-	-	-	-	-	-	-	-	-	-	-
PsCam010407	0.6184	chr6LG2	485553	2		-	-	-	-	-	-	-	-	-	-	-	-	-	-	-	-	-	-	-	-	-	-	-	-	-	-	-	-	-	-	-	-	-	-	-	-	-	-	-	-	-	-	-	-
PsCam051195	0.8559	chr6LG2	1122573	2		-	-	-	-	-	-	-	-	-	-	-	-	-	-	-	-	-	-	-	-	-	-	-	-	-	-	-	-	-	-	-	-	-	-	-	-	-	-	-	-	-	-	-	-
PsCam050533	0.8559	chr6LG2	1169694	2		-	-	-	-	-	-	-	-	-	-	-	-	-	-	-	-	-	-	-	-	-	-	-	-	-	-	-	-	-	-	-	-	-	-	-	-	-	-	-	-	-	-	-	-
PsCam009681	7.1328	chr6LG2	6666194	2		K	E	E	E	K	E	E	K	K	E	E	-	K	E	E	K	E	K	E	K	E	K	K	E	E	E	E	E	E	E	E	E	E	K	K	K	E	E	K	K	K	E	K	K
PsCam048223	7.384	chr6LG2	5775705	2		K	E	E	E	K	E	E	K	K	E	E	K	K	E	E	K	E	K	E	K	E	K	K	E	E	E	E	E	E	E	E	E	E	K	K	K	E	E	K	K	K	E	K	K
PsCam050583	7.384	chr6LG2	7065360	2		K	E	E	E	K	E	E	K	K	E	E	K	K	E	E	K	E	K	E	K	E	K	K	E	E	E	E	E	E	E	E	E	E	K	K	K	E	E	K	K	K	E	K	K
PsCam050863	7.384	chr6LG2	7064262	2		K	E	E	E	K	E	E	K	K	E	E	-	K	E	E	K	E	K	E	K	E	K	K	E	E	E	E	E	E	E	E	E	E	K	K	K	E	E	K	K	K	E	K	K
PsCam043434	7.384	chr6LG2	7029801	2		K	E	E	E	K	E	E	K	K	E	E	-	K	E	E	K	E	K	E	K	E	K	K	E	E	E	E	E	E	E	E	E	E	K	K	K	E	E	K	K	K	E	K	K
PsCam058155	7.384	chr6LG2	7010865	2		K	E	E	E	K	E	E	K	K	E	E	K	K	E	E	K	E	K	E	K	E	K	K	E	E	E	E	E	E	E	E	E	E	K	K	K	E	E	K	K	K	E	K	K
PsCam050636	7.384	chr6LG2	6910339	2		K	E	E	E	K	E	E	K	K	E	E	K	K	E	E	K	E	K	E	K	E	K	K	E	E	E	E	E	E	E	E	E	E	K	K	K	E	E	K	K	K	E	K	K
PsCam045965	7.384	chr6LG2	6860344	2		K	E	E	E	K	E	E	K	K	E	E	K	K	E	E	K	E	K	E	K	E	K	K	E	E	E	E	E	E	E	E	E	E	K	K	K	E	E	K	K	K	E	K	K
PsCam043572	7.384	chr6LG2	6832024	2		K	E	E	E	K	E	E	K	K	E	E	-	K	E	E	K	E	K	E	K	E	K	K	E	E	E	E	E	E	E	E	E	E	K	K	K	E	E	K	K	K	E	K	K
PsCam025630	7.384	chr6LG2	6794563	2		K	E	E	E	K	E	E	K	K	E	E	-	K	E	E	K	E	K	E	K	E	K	K	E	E	E	E	E	E	E	E	E	E	K	K	K	E	E	K	K	K	E	K	K
PsCam044060	7.384	chr6LG2	6041089	2		K	E	E	E	K	E	E	K	K	E	E	K	K	E	E	K	E	K	E	K	E	K	K	E	E	E	E	E	E	E	E	E	E	K	K	K	E	E	K	K	K	E	K	K
PsCam042677	7.6353	chr6LG2	5946540	2		K	E	E	E	K	E	E	K	K	E	E	-	K	E	E	K	E	K	E	K	E	K	K	E	E	E	E	E	E	E	E	E	E	K	K	K	E	E	K	K	K	E	K	K
PsCam007539	7.6353	chr6LG2	6717424	2		K	E	E	E	K	E	E	K	K	E	E	-	K	E	E	K	E	K	E	K	E	K	K	E	E	E	E	E	E	E	E	E	E	K	K	K	E	E	K	K	K	E	K	K
PsCam053657	7.6353	chr6LG2	4594038	2		K	E	E	E	K	E	E	K	K	E	E	-	K	E	E	K	E	K	E	K	E	K	K	E	E	E	E	E	E	E	E	E	E	K	K	K	E	E	K	K	K	E	K	K
PsCam045307	7.7605	chr6LG2	5471132	2		K	E	E	E	K	E	E	K	K	E	E	-	K	E	E	K	E	K	E	K	E	K	K	E	E	E	E	E	E	E	E	E	E	K	K	K	E	E	K	K	K	E	K	K
PsCam038170	7.7605	chr6LG2	5258065	2		K	E	E	E	K	E	E	K	K	E	E	K	K	E	E	K	E	K	E	K	E	K	K	E	E	E	E	E	E	E	E	E	E	K	K	K	E	E	K	K	K	E	K	K
PsCam037514	7.8859	chr6LG2	5235125	2		K	E	E	E	K	E	E	K	K	E	E	K	K	E	E	K	E	K	E	K	E	K	K	E	E	E	E	E	E	E	E	E	E	K	K	K	E	K	K	K	K	E	K	K
PsCam037438	9.8729	chr6LG2	7186202	2		K	E	E	E	K	E	E	K	K	E	E	-	K	E	E	K	E	K	E	K	E	K	K	E	E	E	E	E	E	E	E	E	E	K	K	K	E	K	K	K	K	E	K	K
PsCam036927	10.1242	chr6LG2	8226848	2		K	E	E	E	K	E	E	K	K	E	E	-	K	E	E	K	E	K	E	K	E	K	K	E	E	E	E	E	E	E	E	E	E	K	K	K	E	K	K	K	K	E	K	K
PsCam040016	11.0205	chr6LG2	8949185	2		K	E	E	E	K	E	E	K	K	E	E	K	K	E	E	K	E	K	E	K	E	K	K	E	E	E	E	E	E	E	E	E	E	K	K	K	E	K	K	K	K	E	K	K
PsCam037687	11.0205	chr6LG2	8905657	2		K	E	E	E	K	E	E	K	K	E	E	K	K	E	E	K	E	K	E	K	E	K	K	E	E	E	E	E	E	E	E	E	E	K	K	K	E	K	K	K	K	E	K	K
PsCam037114	11.0205	scaffold05857	15139	2		K	E	E	E	K	E	E	K	K	E	E	K	K	E	E	K	E	K	E	K	E	K	K	E	E	E	E	E	E	E	E	E	E	K	K	K	E	K	K	K	K	E	K	K
PsCam051164	11.1454	chr6LG2	8712770	2		K	E	E	E	K	E	E	K	K	E	E	K	K	E	E	K	E	K	E	K	E	K	K	E	E	E	E	E	E	E	E	E	E	K	K	K	E	K	K	K	K	E	K	K
PsCam000678	11.2705	chr6LG2	9253708	2		K	E	E	E	K	E	E	K	K	E	E	K	K	E	E	K	E	K	E	K	E	K	K	E	E	E	E	E	E	E	E	E	E	K	K	K	E	K	K	K	K	E	K	K
PsCam000204	11.2705	chr6LG2	8789914	2		K	E	E	E	K	E	E	K	K	E	E	K	K	E	E	K	E	K	E	K	E	K	K	E	E	E	E	E	E	E	E	E	E	K	K	K	E	K	K	K	K	E	K	K
PsCam049415	11.2705	chr6LG2	9158896	2		K	E	E	E	K	E	E	K	K	E	E	-	K	E	E	K	E	K	E	K	E	K	K	E	E	E	E	E	E	E	E	E	E	K	K	K	E	K	K	K	K	E	K	K
PsCam042697	11.2705	scaffold02139	279149	2		K	E	E	E	K	E	E	K	K	E	E	-	K	E	E	K	E	K	E	K	E	K	K	E	E	E	E	E	E	E	E	E	E	K	K	K	E	K	K	K	K	E	K	K
PsCam043133	11.6606	scaffold03398	119932	2		K	E	E	E	K	E	E	K	K	E	E	K	K	-	E	K	E	E	E	K	E	K	E	E	E	E	E	E	E	E	E	E	E	K	K	K	E	K	K	K	K	E	K	K
PsCam050796	12.4279	chr6LG2	10835946	2		K	E	E	E	K	E	E	K	K	E	E	K	K	E	E	K	E	E	E	K	E	K	E	E	E	E	E	E	E	E	E	E	E	K	K	K	E	K	K	K	K	E	K	E
PsCam036629	12.4279	chr6LG2	10867412	2		K	E	E	E	K	E	E	K	K	E	E	-	K	E	E	K	E	E	E	K	E	K	E	E	E	E	E	E	E	E	E	E	E	K	K	K	E	K	K	K	K	E	K	E
PsCam043758	12.933	chr6LG2	10295773	2		K	E	E	E	K	E	E	K	K	E	E	-	K	E	E	K	E	E	E	K	E	K	E	E	E	E	E	E	E	E	E	E	E	K	K	K	E	K	K	K	K	E	K	E
PsCam025575	12.933	chr6LG2	11083456	2		K	E	E	E	K	E	E	K	K	E	E	K	K	E	E	K	E	E	E	K	E	K	E	E	E	E	E	E	E	E	E	E	E	K	K	K	E	K	K	K	K	E	K	E
PsCam042513	12.933	chr6LG2	11096764	2		K	E	E	E	K	E	E	K	K	E	E	-	K	E	E	K	E	E	E	K	E	K	E	E	E	E	E	E	E	E	E	E	E	K	K	K	E	K	K	K	K	E	K	E
PsCam040773	12.933	chr6LG2	11401491	2		K	E	E	E	K	E	E	K	K	E	E	-	K	E	E	K	E	E	E	K	E	K	E	E	E	E	E	E	E	E	E	E	E	K	K	K	E	K	K	K	K	E	K	E
PsCam010223	12.933	chr6LG2	11628375	2		K	E	E	E	K	E	E	K	K	E	E	-	K	E	E	K	E	E	E	K	E	K	E	E	E	E	E	E	E	E	E	E	E	K	K	K	E	K	K	K	K	E	K	E
PsCam048859	13.7122	chr6LG2	11751918	2		K	E	E	K	K	E	E	K	K	E	E	K	K	E	E	K	E	E	E	K	E	K	E	E	E	E	E	E	E	E	E	E	E	K	K	K	E	K	K	K	K	E	K	E
PsCam001593	13.7122	chr6LG2	11720881	2		K	E	E	K	K	E	E	K	K	E	E	K	K	E	E	K	E	E	E	K	E	K	E	E	E	E	E	E	E	E	E	E	E	K	K	K	E	K	K	K	K	E	K	E
PsCam055903	13.8396	chr6LG2	11675629	2		K	E	E	K	K	E	E	K	K	E	E	-	K	E	E	K	E	E	E	K	E	K	E	E	E	E	E	E	E	E	E	E	E	K	K	K	E	K	K	K	K	E	K	E
PsCam051835	13.8396	chr6LG2	13873755	2		K	E	E	K	K	E	E	K	K	E	E	-	K	E	E	K	E	E	E	K	E	K	E	E	E	E	E	E	E	E	E	E	E	K	K	K	E	K	K	K	K	E	K	E
PsCam050839	13.8396	chr6LG2	13741294	2		K	E	E	K	K	E	E	K	K	E	E	K	K	E	E	K	E	E	E	K	E	K	E	E	E	E	E	E	E	E	E	E	E	K	K	K	E	K	K	K	K	E	K	E
PsCam045199	13.8396	chr6LG2	13556289	2		K	E	E	K	K	E	E	K	K	E	E	K	K	E	E	K	E	E	E	K	E	K	E	E	E	E	E	E	E	E	E	E	E	K	K	K	E	K	K	K	K	E	K	E
PsCam049948	13.8396	chr6LG2	13533101	2		K	E	E	K	K	E	E	K	K	E	E	-	K	E	E	K	E	E	E	K	E	K	E	E	E	E	E	E	E	E	E	E	E	K	K	K	E	K	K	K	K	E	K	E
PsCam001643	13.8396	chr6LG2	13531230	2		K	E	E	K	K	E	E	K	K	E	E	K	K	E	E	K	E	E	E	K	E	K	E	E	E	E	E	E	E	E	E	E	E	K	K	K	E	K	K	K	K	E	K	E
PsCam005065	13.8396	chr6LG2	13500431	2		K	E	E	K	K	E	E	K	K	E	E	K	K	E	E	K	E	E	E	K	E	K	E	E	E	E	E	E	E	E	E	E	E	K	K	K	E	K	K	K	K	E	K	E
PsCam005916	13.8396	chr6LG2	13499227	2		K	E	E	K	K	E	E	K	K	E	E	-	K	E	E	K	E	E	E	K	E	K	E	E	E	E	E	E	E	E	E	E	E	K	K	K	E	K	K	K	K	E	K	E
PsCam046606	13.8396	chr6LG2	13278881	2		K	E	E	K	K	E	E	K	K	E	E	K	K	E	E	K	E	E	E	K	E	K	E	E	E	E	E	E	E	E	E	E	E	K	K	K	E	K	K	K	K	E	K	E
PsCam042195	26.4484	chr6LG2	22283339	2		K	E	K	K	K	K	E	K	K	E	E	K	K	K	K	K	E	E	E	K	E	E	E	K	E	E	E	E	E	E	E	E	E	K	K	K	E	K	K	K	K	K	K	E
PsCam042941	26.6911	chr6LG2	22063993	2		K	E	K	K	K	K	E	K	K	E	E	K	K	K	K	K	E	E	E	K	E	E	E	K	E	E	E	E	E	E	E	E	E	K	K	K	E	K	K	K	K	K	K	E
PsCam040685	26.6911	chr6LG2	19809652	2		K	E	K	K	K	K	E	K	K	E	E	K	K	K	K	K	E	E	E	K	E	E	E	K	E	E	E	E	E	E	E	E	E	K	K	K	E	K	K	K	K	K	K	E
PsCam000966	26.8117	chr6LG2	21841198	2		K	E	K	K	K	K	E	K	K	E	E	K	K	K	K	K	E	E	E	K	E	E	E	K	E	E	E	E	E	E	K	E	E	K	K	K	E	K	K	K	K	K	K	E
PsCam038406	26.8117	chr6LG2	21806695	2		K	E	K	K	K	K	E	K	K	E	E	K	K	K	K	K	E	E	E	K	E	E	E	K	E	E	E	E	E	E	K	E	E	K	K	K	E	K	K	K	K	K	K	E
PsCam035885	26.8117	chr6LG2	21762360	2		K	E	K	K	K	K	E	K	K	E	E	K	K	K	K	K	E	E	E	K	E	E	E	K	E	E	E	E	E	E	K	E	E	K	K	K	E	K	K	K	K	K	K	E
PsCam048932	27.4237	chr6LG2	22758241	2		K	E	K	K	K	K	E	K	K	E	E	K	K	K	K	K	E	E	E	K	E	E	E	K	E	E	E	E	E	E	K	E	E	K	K	K	E	K	K	K	E	K	K	E
PsCam050872	27.4237	scaffold03273	110119	2		K	E	K	K	K	K	E	K	K	E	E	K	K	K	K	K	E	E	E	K	E	E	E	K	E	E	E	E	E	E	K	E	E	K	K	K	E	K	K	K	E	K	K	E
PsCam042590	27.4237	chr6LG2	22790605	2		K	E	K	K	K	K	E	K	K	E	E	K	K	K	K	K	E	E	E	K	E	E	E	K	E	E	E	E	E	E	K	E	E	K	K	K	E	K	K	K	E	K	K	E
PsCam016900	27.4237	chr6LG2	22827937	2		K	E	K	K	K	K	E	K	K	E	E	K	K	K	K	K	E	E	E	K	E	E	E	K	E	E	E	E	E	E	K	E	E	K	K	K	E	K	K	K	E	K	K	E
PsCam048197	27.4237	chr6LG2	22849623	2		K	E	K	K	K	K	E	K	K	E	E	K	K	K	K	K	E	E	E	K	E	E	E	K	E	E	E	E	E	E	K	E	E	K	K	K	E	K	K	K	E	K	K	E
PsCam017163	27.4237	chr6LG2	22913084	2		K	E	K	K	K	K	E	K	K	E	E	K	K	K	K	K	E	E	E	K	E	E	E	K	E	E	E	E	E	E	K	E	E	K	K	K	E	K	K	K	E	K	K	E
PsCam017451	27.4237	chr6LG2	22915588	2		K	E	K	K	K	K	E	K	K	E	E	K	K	K	K	K	E	E	E	K	E	E	E	K	E	E	E	E	E	E	K	E	E	K	K	K	E	K	K	K	E	K	K	E
PsCam036582	27.4237	chr6LG2	23026650	2		K	E	K	K	K	K	E	K	K	E	E	K	K	K	K	K	E	E	E	K	E	E	E	K	E	E	E	E	E	E	K	E	E	K	K	K	E	K	K	K	E	K	K	E
PsCam029359	27.4237	chr6LG2	23063130	2		K	E	K	K	K	K	E	K	K	E	E	K	K	K	K	K	E	E	E	K	E	E	E	K	E	E	E	E	E	E	K	E	E	K	K	K	E	K	K	K	E	K	K	E
PsCam027214	27.4237	chr6LG2	23065673	2		K	E	K	K	K	K	E	K	K	E	E	K	K	K	K	K	E	E	E	K	E	E	E	K	E	E	E	E	E	E	K	E	E	K	K	K	E	K	K	K	E	K	K	E
PsCam011608	27.5443	chr6LG2	23351040	2		K	E	K	K	K	K	E	K	K	E	E	K	K	K	K	K	E	E	E	K	E	E	E	K	E	E	E	E	E	E	K	E	E	K	K	K	E	K	K	K	E	K	K	E
PsCam057626	27.5443	chr6LG2	23313991	2		K	E	K	K	K	K	E	K	K	E	E	K	K	K	K	K	E	E	E	K	E	E	E	K	E	E	E	E	E	E	K	E	E	K	K	K	E	K	K	K	E	K	K	E
PsCam004729	27.5443	chr6LG2	23268030	2		K	E	K	K	K	K	E	K	K	E	E	K	K	K	K	K	E	E	E	K	E	E	E	K	E	E	E	E	E	E	K	E	E	K	K	K	E	K	K	K	E	K	K	E
PsCam020985	27.5443	chr6LG2	23446859	2		K	E	K	K	K	K	E	K	K	E	E	K	K	K	K	K	E	E	E	K	E	E	E	K	E	E	E	E	E	E	K	E	E	K	K	K	E	K	K	K	E	K	K	E
PsCam047856	27.5443	chr6LG2	23453382	2		K	E	K	K	K	K	E	K	K	E	E	K	K	K	K	K	E	E	E	K	E	E	E	K	E	E	E	E	E	E	K	E	E	K	K	K	E	K	K	K	E	K	K	E
PsCam053188	27.5443	chr6LG2	23578747	2		K	E	K	K	K	K	E	K	K	E	E	K	K	K	K	K	E	E	E	K	E	E	E	K	E	E	E	E	E	E	K	E	E	K	K	K	E	K	K	K	E	K	K	E
PsCam039083	27.7876	chr6LG2	24348457	2		K	E	K	K	K	K	E	K	K	E	E	K	K	K	K	K	E	E	E	K	E	E	E	K	E	E	E	E	E	E	K	E	E	K	K	K	E	K	K	K	E	K	K	E
PsCam026910	28.2778	chr6LG2	24084062	2		K	E	K	K	K	K	E	K	K	E	E	K	K	K	K	K	E	E	E	K	E	E	E	K	E	E	E	E	E	E	K	E	E	K	K	K	E	K	K	K	E	K	K	E
PsCam026752	28.2778	chr6LG2	24591219	2		K	E	K	K	K	K	E	K	K	E	E	K	K	K	K	K	E	E	E	K	E	E	E	K	E	E	E	E	E	E	K	E	E	K	K	K	E	K	K	K	E	K	K	E
PsCam028629	28.2778	chr6LG2	24597741	2		K	E	K	K	K	K	E	K	K	E	E	K	K	K	K	K	E	E	E	K	E	E	E	K	E	E	E	E	E	E	K	E	E	K	K	K	E	K	K	K	E	K	K	E
PsCam050595	28.2778	chr6LG2	24608651	2		K	E	K	K	K	K	E	K	K	E	E	K	K	K	K	K	E	E	E	K	E	E	E	K	E	E	E	E	E	E	K	E	E	K	K	K	E	K	K	K	E	K	K	E
PsCam044808	28.2778	chr6LG2	24666032	2		K	E	K	K	K	K	E	K	K	E	E	K	K	K	K	K	E	E	E	K	E	E	E	K	E	E	E	E	E	E	K	E	E	K	K	K	E	K	K	K	E	K	K	E
PsCam045277	28.3985	chr6LG2	24925140	2		K	E	K	K	K	K	E	K	K	E	E	K	K	K	K	K	E	E	E	K	E	E	E	K	E	E	E	E	E	E	K	E	E	K	K	K	E	K	K	K	E	K	K	E
PsCam013207	28.763	chr6LG2	25219262	2		K	E	K	K	K	K	E	K	K	E	E	K	K	K	K	K	E	E	E	K	E	E	E	K	E	E	E	E	E	E	K	E	E	K	K	K	E	K	K	K	E	K	K	E
PsCam042491	28.8836	chr6LG2	25279750	2		K	E	K	K	K	K	E	K	K	E	E	K	K	K	K	K	E	E	E	K	E	E	E	K	E	E	E	E	E	E	K	E	E	K	K	K	E	K	K	K	E	K	K	E
PsCam043479	29.0042	chr6LG2	25323141	2		K	E	K	K	K	E	E	K	K	E	E	K	K	K	K	K	E	E	E	K	E	E	E	K	E	E	E	E	E	E	K	E	E	K	K	K	E	K	K	K	E	K	K	E
PsCam011763	29.0042	chr6LG2	25442396	2		K	E	K	K	K	E	E	K	K	E	E	K	K	K	K	K	E	E	E	K	E	E	E	K	E	E	E	E	E	E	K	E	E	K	K	K	E	K	K	K	E	K	K	E
PsCam009728	29.0042	chr6LG2	25452830	2		K	E	K	K	K	E	E	K	K	E	E	K	K	K	K	K	E	E	E	K	E	E	E	K	E	E	E	E	E	E	K	E	E	K	K	K	E	K	K	K	E	K	K	E
PsCam043123	29.0042	chr6LG2	25491981	2		E	E	K	K	K	E	E	K	K	E	E	K	K	K	K	K	E	E	E	K	E	E	E	K	E	E	E	E	E	E	K	E	E	K	K	K	E	K	K	K	E	K	K	E
PsCam031179	29.2441	chr6LG2	25547267	2		-	-	-	-	-	-	-	-	-	-	-	-	-	-	-	-	-	-	-	-	-	-	-	-	-	-	-	-	-	-	-	-	-	-	-	-	-	-	-	-	-	-	-	-
PsCam057966	29.2441	chr6LG2	25591931	2		E	E	K	K	K	E	E	K	K	E	E	K	K	K	K	K	E	E	E	K	E	E	E	K	E	E	E	E	E	E	K	E	E	K	K	K	E	K	K	K	E	K	K	E
PsCam033331	29.2441	chr6LG2	25698333	2		E	E	K	K	K	E	E	K	K	E	E	K	K	K	K	K	E	E	E	K	E	E	E	K	E	E	E	E	E	E	K	E	E	K	K	K	E	K	K	K	E	K	K	E
PsCam039949	29.2441	chr6LG2	25942918	2		-	-	-	-	-	-	-	-	-	-	-	-	-	-	-	-	-	-	-	-	-	-	-	-	-	-	-	-	-	-	-	-	-	-	-	-	-	-	-	-	-	-	-	-
PsCam046269	29.2441	chr6LG2	25990646	2		-	-	-	-	-	-	-	-	-	-	-	-	-	-	-	-	-	-	-	-	-	-	-	-	-	-	-	-	-	-	-	-	-	-	-	-	-	-	-	-	-	-	-	-
PsCam023650	29.4816	chr6LG2	5508017	2		E	E	K	K	K	E	E	K	K	E	E	K	K	K	K	K	E	E	E	K	E	E	E	K	E	E	E	E	E	E	K	E	E	K	K	K	E	K	K	K	E	K	K	E
PsCam000550	29.4816	chr6LG2	26255304	2		-	-	-	-	-	-	-	-	-	-	-	-	-	-	-	-	-	-	-	-	-	-	-	-	-	-	-	-	-	-	-	-	-	-	-	-	-	-	-	-	-	-	-	-
PsCam012965	29.6037	chr6LG2	26725189	2		-	-	-	-	-	-	-	-	-	-	-	-	-	-	-	-	-	-	-	-	-	-	-	-	-	-	-	-	-	-	-	-	-	-	-	-	-	-	-	-	-	-	-	-
PsCam034312	29.6037	chr6LG2	26718332	2		-	-	-	-	-	-	-	-	-	-	-	-	-	-	-	-	-	-	-	-	-	-	-	-	-	-	-	-	-	-	-	-	-	-	-	-	-	-	-	-	-	-	-	-
PsCam055229	29.6037	chr6LG2	26642335	2		-	-	-	-	-	-	-	-	-	-	-	-	-	-	-	-	-	-	-	-	-	-	-	-	-	-	-	-	-	-	-	-	-	-	-	-	-	-	-	-	-	-	-	-
PsCam051380	29.6037	chr6LG2	26572840	2		E	E	K	K	K	E	E	K	K	E	E	K	K	K	K	K	E	E	E	K	E	E	E	K	E	E	E	E	E	E	K	E	E	K	K	K	E	K	K	K	E	K	K	E
PsCam000006	29.6037	scaffold00839	7515	2		E	E	K	K	K	E	E	K	K	E	E	K	K	K	K	-	E	E	E	K	E	E	E	K	E	E	E	E	E	E	K	E	E	K	K	K	E	K	K	K	E	K	K	E
PsCam001310	29.6037	chr6LG2	27086622	2		E	E	K	K	K	E	E	K	K	E	E	K	K	K	K	K	E	E	E	K	E	E	E	K	E	E	E	E	E	E	K	E	E	K	K	K	E	K	K	K	E	K	K	E
PsCam059346	29.6037	chr6LG2	27020842	2		-	-	-	-	-	-	-	-	-	-	-	-	-	-	-	-	-	-	-	-	-	-	-	-	-	-	-	-	-	-	-	-	-	-	-	-	-	-	-	-	-	-	-	-
PsCam046407	29.6037	chr6LG2	26924710	2		-	-	-	-	-	-	-	-	-	-	-	-	-	-	-	-	-	-	-	-	-	-	-	-	-	-	-	-	-	-	-	-	-	-	-	-	-	-	-	-	-	-	-	-
PsCam058867	29.8488	chr6LG2	26903094	2		-	-	-	-	-	-	-	-	-	-	-	-	-	-	-	-	-	-	-	-	-	-	-	-	-	-	-	-	-	-	-	-	-	-	-	-	-	-	-	-	-	-	-	-
PsCam038122	29.8488	chr6LG2	26852731	2		-	-	-	-	-	-	-	-	-	-	-	-	-	-	-	-	-	-	-	-	-	-	-	-	-	-	-	-	-	-	-	-	-	-	-	-	-	-	-	-	-	-	-	-
PsCam039421	29.8488	chr6LG2	26836004	2		-	-	-	-	-	-	-	-	-	-	-	-	-	-	-	-	-	-	-	-	-	-	-	-	-	-	-	-	-	-	-	-	-	-	-	-	-	-	-	-	-	-	-	-
PsCam006704	29.8488	chr6LG2	26828595	2		-	-	-	-	-	-	-	-	-	-	-	-	-	-	-	-	-	-	-	-	-	-	-	-	-	-	-	-	-	-	-	-	-	-	-	-	-	-	-	-	-	-	-	-
PsCam040169	30.0863	chr6LG2	27631929	2		E	E	K	K	K	E	E	K	K	E	E	K	K	K	K	K	E	E	E	K	E	E	E	K	E	E	E	E	E	E	K	E	E	K	K	K	E	K	K	K	E	K	E	E
PsCam033451	30.3238	chr6LG2	4333044	2		-	-	-	-	-	-	-	-	-	-	-	-	-	-	-	-	-	-	-	-	-	-	-	-	-	-	-	-	-	-	-	-	-	-	-	-	-	-	-	-	-	-	-	-
PsCam051488	30.4459	chr6LG2	27244799	2		-	-	-	-	-	-	-	-	-	-	-	-	-	-	-	-	-	-	-	-	-	-	-	-	-	-	-	-	-	-	-	-	-	-	-	-	-	-	-	-	-	-	-	-
PsCam059423	30.4459	chr6LG2	27270762	2		-	-	-	-	-	-	-	-	-	-	-	-	-	-	-	-	-	-	-	-	-	-	-	-	-	-	-	-	-	-	-	-	-	-	-	-	-	-	-	-	-	-	-	-
PsCam014081	30.5683	chr6LG2	27313576	2		-	-	-	-	-	-	-	-	-	-	-	-	-	-	-	-	-	-	-	-	-	-	-	-	-	-	-	-	-	-	-	-	-	-	-	-	-	-	-	-	-	-	-	-
PsCam039308	30.5683	chr6LG2	27324188	2		-	-	-	-	-	-	-	-	-	-	-	-	-	-	-	-	-	-	-	-	-	-	-	-	-	-	-	-	-	-	-	-	-	-	-	-	-	-	-	-	-	-	-	-
PsCam038299	30.5683	chr6LG2	27470343	2		E	E	K	K	K	E	E	K	K	E	E	K	K	K	K	K	E	E	E	K	E	E	E	K	E	E	E	E	E	E	K	E	E	K	K	K	E	K	K	K	E	K	E	E
PsCam050273	30.5683	chr6LG2	27515927	2		E	E	K	K	K	E	E	K	K	E	E	K	K	K	K	K	E	E	E	K	E	E	E	K	E	E	E	E	E	E	K	E	E	K	K	K	E	K	K	K	E	K	E	E
PsCam034344	30.5683	chr6LG2	27533748	2		-	-	-	-	-	-	-	-	-	-	-	-	-	-	-	-	-	-	-	-	-	-	-	-	-	-	-	-	-	-	-	-	-	-	-	-	-	-	-	-	-	-	-	-
PsCam021062	30.5683	chr6LG2	2980156	2		E	E	K	K	K	E	E	K	K	E	E	K	K	K	K	K	E	E	E	K	E	E	E	K	E	E	E	E	E	E	K	E	E	K	K	K	E	K	K	K	E	K	E	E
PsCam036258	30.8059	chr6LG2	3373435	2		E	E	K	K	K	E	E	K	K	E	E	K	K	K	K	K	E	E	E	K	E	E	E	K	E	E	E	E	E	E	K	E	E	K	K	K	E	K	K	K	E	K	E	E
PsCam000030	30.8059	chr6LG2	28470286	2		-	-	-	-	-	-	-	-	-	-	-	-	-	-	-	-	-	-	-	-	-	-	-	-	-	-	-	-	-	-	-	-	-	-	-	-	-	-	-	-	-	-	-	-
PsCam045616	30.8059	chr6LG2	27967130	2		-	-	-	-	-	-	-	-	-	-	-	-	-	-	-	-	-	-	-	-	-	-	-	-	-	-	-	-	-	-	-	-	-	-	-	-	-	-	-	-	-	-	-	-
PsCam034108	30.8059	chr6LG2	28059581	2		-	-	-	-	-	-	-	-	-	-	-	-	-	-	-	-	-	-	-	-	-	-	-	-	-	-	-	-	-	-	-	-	-	-	-	-	-	-	-	-	-	-	-	-
PsCam053860	30.8059	chr5LG3	136118754	2		E	E	K	K	K	E	E	K	K	E	E	K	K	K	K	K	E	E	E	K	E	E	E	K	E	E	E	E	E	E	K	E	E	K	K	K	E	K	K	K	E	K	E	E
PsCam037964	31.0434	chr6LG2	28086856	2		E	E	K	K	K	E	E	K	K	E	E	K	K	K	K	K	E	E	E	K	E	E	E	K	E	E	E	E	E	E	K	E	E	K	K	K	E	K	K	K	E	K	E	E
PsCam057959	31.2809	chr6LG2	28113644	2		-	-	-	-	-	-	-	-	-	-	-	-	-	-	-	-	-	-	-	-	-	-	-	-	-	-	-	-	-	-	-	-	-	-	-	-	-	-	-	-	-	-	-	-
PsCam050952	31.2809	chr6LG2	28526867	2		E	E	K	K	K	E	E	K	K	E	E	K	K	K	K	K	E	E	E	K	E	E	E	K	E	E	E	E	E	E	K	E	E	K	K	K	E	K	K	K	E	K	E	E
PsCam045022	31.2809	chr6LG2	28995497	2		-	-	-	-	-	-	-	-	-	-	-	-	-	-	-	-	-	-	-	-	-	-	-	-	-	-	-	-	-	-	-	-	-	-	-	-	-	-	-	-	-	-	-	-
PsCam034762	31.2809	chr6LG2	29115032	2		E	E	K	K	K	E	E	K	K	E	E	K	K	K	K	K	E	E	E	K	E	E	E	K	E	E	E	E	E	E	K	E	E	K	K	K	E	K	K	K	E	K	E	E
PsCam045605	31.2809	chr6LG2	29108376	2		E	E	K	K	K	E	E	K	K	E	E	K	K	K	K	K	E	E	E	K	E	E	E	K	E	E	E	E	E	E	K	E	E	K	K	K	E	K	K	K	E	K	E	E
PsCam058871	31.2809	chr6LG2	29104564	2		E	E	K	K	K	E	E	K	K	E	E	K	K	K	K	K	E	E	E	K	E	E	E	K	E	E	E	E	E	E	K	E	E	-	K	K	E	K	K	K	E	K	E	E
PsCam045657	31.2809	chr6LG2	29098306	2		E	E	K	K	K	E	E	K	K	E	E	K	K	K	K	K	E	E	E	K	E	E	E	K	E	E	E	E	E	E	K	E	E	K	K	K	E	K	K	K	E	K	E	E
PsCam013475	31.2809	chr6LG2	29763583	2		E	E	K	K	K	E	E	K	K	E	E	K	K	K	K	K	E	E	E	K	E	E	E	K	E	E	E	E	E	E	K	E	E	K	K	K	E	K	K	K	E	K	E	E
PsCam059446	31.2809	chr6LG2	29762024	2		E	E	K	K	K	E	E	K	K	E	E	K	K	K	K	K	E	E	E	K	E	E	E	K	E	E	E	E	E	E	K	E	E	K	K	K	E	K	K	K	E	K	E	E
PsCam036190	31.2809	chr6LG2	29726494	2		E	E	K	K	K	E	E	K	K	E	E	K	K	K	K	K	E	E	E	K	E	E	E	K	E	E	E	E	E	E	K	E	E	K	K	K	E	K	K	K	E	K	E	E
PsCam049064	31.2809	chr6LG2	29531626	2		E	E	K	K	K	E	E	K	K	E	E	K	K	K	K	K	E	E	E	K	E	E	E	K	E	E	E	E	E	E	K	E	E	K	K	K	E	K	K	K	E	K	E	E
PsCam043961	31.2809	chr6LG2	29364629	2		-	-	-	-	-	-	-	-	-	-	-	-	-	-	-	-	-	-	-	-	-	-	-	-	-	-	-	-	-	-	-	-	-	-	-	-	-	-	-	-	-	-	-	-
PsCam049228	31.2809	chr6LG2	29331656	2		-	-	-	-	-	-	-	-	-	-	-	-	-	-	-	-	-	-	-	-	-	-	-	-	-	-	-	-	-	-	-	-	-	-	-	-	-	-	-	-	-	-	-	-
PsCam043698	31.2809	chr6LG2	29326357	2		E	E	K	K	K	E	E	K	K	E	E	K	K	K	K	K	E	E	E	K	E	E	E	K	E	E	E	E	E	E	K	E	E	K	K	K	E	K	K	K	E	K	E	E
PsCam023037	31.2809	chr6LG2	29314189	2		E	E	K	K	K	E	E	K	K	E	E	K	K	K	K	K	E	E	E	K	E	E	E	K	E	E	E	E	E	E	K	E	E	K	K	K	E	K	K	K	E	K	E	E
PsCam057939	31.2809	chr6LG2	30059276	2		-	-	-	-	-	-	-	-	-	-	-	-	-	-	-	-	-	-	-	-	-	-	-	-	-	-	-	-	-	-	-	-	-	-	-	-	-	-	-	-	-	-	-	-
PsCam039993	31.2809	chr6LG2	29907498	2		-	-	-	-	-	-	-	-	-	-	-	-	-	-	-	-	-	-	-	-	-	-	-	-	-	-	-	-	-	-	-	-	-	-	-	-	-	-	-	-	-	-	-	-
PsCam026516	31.2809	chr6LG2	30091573	2		-	-	-	-	-	-	-	-	-	-	-	-	-	-	-	-	-	-	-	-	-	-	-	-	-	-	-	-	-	-	-	-	-	-	-	-	-	-	-	-	-	-	-	-
PsCam039016	31.2809	chr6LG2	30454983	2		-	-	-	-	-	-	-	-	-	-	-	-	-	-	-	-	-	-	-	-	-	-	-	-	-	-	-	-	-	-	-	-	-	-	-	-	-	-	-	-	-	-	-	-
PsCam057920	31.2809	chr6LG2	30339893	2		-	-	-	-	-	-	-	-	-	-	-	-	-	-	-	-	-	-	-	-	-	-	-	-	-	-	-	-	-	-	-	-	-	-	-	-	-	-	-	-	-	-	-	-
PsCam036185	31.2809	chr6LG2	30305759	2		-	-	-	-	-	-	-	-	-	-	-	-	-	-	-	-	-	-	-	-	-	-	-	-	-	-	-	-	-	-	-	-	-	-	-	-	-	-	-	-	-	-	-	-
PsCam012851	31.2809	chr6LG2	30299667	2		E	E	K	K	K	E	E	K	K	E	E	K	K	K	K	E	E	E	E	K	E	E	E	K	E	E	E	E	E	E	K	E	E	K	K	K	E	K	K	K	E	K	E	E
PsCam036931	31.2809	chr6LG2	30297418	2		E	E	K	K	K	E	E	K	K	E	E	K	K	K	K	E	E	E	E	K	E	E	E	K	E	E	E	E	E	E	K	E	E	K	K	K	E	K	K	K	E	K	E	E
PsCam006801	31.2809	chr6LG2	30220409	2		E	E	K	K	K	E	E	K	K	E	E	K	K	K	K	E	E	E	E	K	E	E	E	K	E	E	E	E	E	E	K	E	E	K	K	K	E	K	K	K	E	K	E	E
PsCam040964	31.2809	chr6LG2	28596035	2		E	E	K	K	K	E	E	K	K	E	E	K	K	K	K	E	E	E	E	K	E	E	E	K	E	E	E	E	E	E	K	E	E	K	K	K	E	K	K	K	E	K	K	E
PsCam025685	31.2809	chr6LG2	27558783	2		-	-	-	-	-	-	-	-	-	-	-	-	-	-	-	-	-	-	-	-	-	-	-	-	-	-	-	-	-	-	-	-	-	-	-	-	-	-	-	-	-	-	-	-
PsCam051065	33.1379	chr6LG2	30754265	2		E	E	K	K	K	E	E	K	K	E	E	K	K	K	K	E	E	E	E	K	E	E	E	K	E	E	E	E	E	E	K	E	E	K	K	K	E	K	K	K	E	K	K	E
PsCam058207	33.1379	chr6LG2	30791897	2		-	-	-	-	-	-	-	-	-	-	-	-	-	-	-	-	-	-	-	-	-	-	-	-	-	-	-	-	-	-	-	-	-	-	-	-	-	-	-	-	-	-	-	-
PsCam049309	33.5069	chr6LG2	32542337	2		-	-	-	-	-	-	-	-	-	-	-	-	-	-	-	-	-	-	-	-	-	-	-	-	-	-	-	-	-	-	-	-	-	-	-	-	-	-	-	-	-	-	-	-
PsCam045651	33.5069	chr6LG2	32547746	2		-	-	-	-	-	-	-	-	-	-	-	-	-	-	-	-	-	-	-	-	-	-	-	-	-	-	-	-	-	-	-	-	-	-	-	-	-	-	-	-	-	-	-	-
PsCam036832	33.5069	chr6LG2	32604001	2		E	E	K	K	K	E	E	K	K	E	E	K	K	K	K	E	E	E	E	K	E	E	E	K	E	E	E	E	E	E	K	E	E	K	K	K	E	K	K	K	E	K	K	E
PsCam022264	33.5069	chr6LG2	32338274	2		E	E	K	K	K	E	E	K	K	E	E	K	K	K	K	E	E	E	E	K	E	E	E	K	E	E	E	E	E	E	K	E	E	K	K	K	E	K	K	K	E	K	K	E
PsCam025781	33.5069	chr6LG2	32339386	2		E	E	K	K	K	E	E	K	K	E	E	K	K	K	K	E	E	E	E	K	E	E	E	K	E	E	E	E	E	E	K	E	E	K	K	K	E	K	K	K	E	K	K	E
PsCam026432	33.5069	chr6LG2	32347689	2		E	E	K	K	K	E	E	K	K	E	E	K	K	K	K	E	E	E	E	K	E	E	E	K	E	E	E	E	E	E	K	E	E	K	K	K	E	K	K	K	E	K	K	E
PsCam036469	33.5069	chr6LG2	33485877	2		-	-	-	-	-	-	-	-	-	-	-	-	-	-	-	-	-	-	-	-	-	-	-	-	-	-	-	-	-	-	-	-	-	-	-	-	-	-	-	-	-	-	-	-
PsCam036821	33.5069	chr6LG2	33490319	2		-	-	-	-	-	-	-	-	-	-	-	-	-	-	-	-	-	-	-	-	-	-	-	-	-	-	-	-	-	-	-	-	-	-	-	-	-	-	-	-	-	-	-	-
PsCam007086	33.6333	chr6LG2	33522001	2		-	-	-	-	-	-	-	-	-	-	-	-	-	-	-	-	-	-	-	-	-	-	-	-	-	-	-	-	-	-	-	-	-	-	-	-	-	-	-	-	-	-	-	-
PsCam006627	33.6333	chr6LG2	33545606	2		-	-	-	-	-	-	-	-	-	-	-	-	-	-	-	-	-	-	-	-	-	-	-	-	-	-	-	-	-	-	-	-	-	-	-	-	-	-	-	-	-	-	-	-
PsCam001219	33.6333	chr6LG2	33390242	2		-	-	-	-	-	-	-	-	-	-	-	-	-	-	-	-	-	-	-	-	-	-	-	-	-	-	-	-	-	-	-	-	-	-	-	-	-	-	-	-	-	-	-	-
PsCam034511	33.6333	chr6LG2	34222395	2		-	-	-	-	-	-	-	-	-	-	-	-	-	-	-	-	-	-	-	-	-	-	-	-	-	-	-	-	-	-	-	-	-	-	-	-	-	-	-	-	-	-	-	-
PsCam033718	33.6333	chr6LG2	31623880	2		-	-	-	-	-	-	-	-	-	-	-	-	-	-	-	-	-	-	-	-	-	-	-	-	-	-	-	-	-	-	-	-	-	-	-	-	-	-	-	-	-	-	-	-
PsCam049657	33.6333	chr6LG2	32971245	2		E	E	K	K	K	E	E	K	K	E	E	K	K	K	K	E	E	E	E	K	E	E	E	K	E	E	E	E	E	E	K	E	E	K	K	K	E	K	K	K	E	K	K	E
PsCam019340	33.6333	chr6LG2	32972028	2		E	E	K	K	K	E	E	K	K	E	E	K	K	K	K	E	E	E	E	K	E	E	E	K	E	E	E	E	E	E	K	E	E	K	K	K	E	K	K	K	E	K	K	E
PsCam038857	33.6333	chr6LG2	33102389	2		E	E	K	K	K	E	E	K	K	E	E	K	K	K	K	E	E	E	E	K	E	E	E	K	E	E	E	E	E	E	K	E	E	K	K	K	E	K	K	K	E	K	K	E
PsCam046524	33.6333	chr6LG2	33198001	2		-	-	-	-	-	-	-	-	-	-	-	-	-	-	-	-	-	-	-	-	-	-	-	-	-	-	-	-	-	-	-	-	-	-	-	-	-	-	-	-	-	-	-	-
PsCam056901	33.6333	chr6LG2	33198123	2		-	-	-	-	-	-	-	-	-	-	-	-	-	-	-	-	-	-	-	-	-	-	-	-	-	-	-	-	-	-	-	-	-	-	-	-	-	-	-	-	-	-	-	-
PsCam044168	33.6333	chr6LG2	33200828	2		-	-	-	-	-	-	-	-	-	-	-	-	-	-	-	-	-	-	-	-	-	-	-	-	-	-	-	-	-	-	-	-	-	-	-	-	-	-	-	-	-	-	-	-
PsCam046282	33.6333	chr6LG2	33241277	2		-	-	-	-	-	-	-	-	-	-	-	-	-	-	-	-	-	-	-	-	-	-	-	-	-	-	-	-	-	-	-	-	-	-	-	-	-	-	-	-	-	-	-	-
PsCam050424	33.6333	chr6LG2	34065088	2		E	E	K	K	K	E	E	K	K	E	E	K	K	K	K	E	E	E	E	K	E	E	E	K	E	E	E	E	E	E	K	E	E	K	K	K	E	K	K	K	E	K	K	E
PsCam036973	33.6333	chr6LG2	34165140	2		-	-	-	-	-	-	-	-	-	-	-	-	-	-	-	-	-	-	-	-	-	-	-	-	-	-	-	-	-	-	-	-	-	-	-	-	-	-	-	-	-	-	-	-
PsCam056959	33.8709	chr6LG2	31273913	2		-	-	-	-	-	-	-	-	-	-	-	-	-	-	-	-	-	-	-	-	-	-	-	-	-	-	-	-	-	-	-	-	-	-	-	-	-	-	-	-	-	-	-	-
PsCam004028	33.8709	chr6LG2	34334106	2		E	E	K	K	K	E	E	K	K	E	E	K	K	K	K	E	E	E	E	K	E	E	E	K	E	E	E	E	E	E	K	E	E	K	K	K	E	K	E	K	E	K	K	E
PsCam048808	33.8709	chr6LG2	34335975	2		E	E	K	K	K	E	E	K	K	E	E	K	K	K	K	E	E	E	E	K	E	E	E	K	E	E	E	E	E	E	K	E	E	K	K	K	E	K	E	K	E	K	K	E
PsCam050832	33.9918	chr6LG2	34529539	2		E	E	K	K	K	E	E	K	K	E	E	K	K	K	K	E	E	E	E	K	E	E	E	K	E	E	E	E	E	E	K	E	E	K	K	K	E	K	E	K	E	K	K	E
PsCam006895	33.9918	chr6LG2	34852782	2		E	E	K	K	K	E	E	K	K	E	E	K	K	K	K	E	E	E	E	K	E	E	E	K	E	E	E	E	E	E	K	E	E	K	K	K	E	K	E	K	E	K	K	E
PsCam036957	34.1127	chr6LG2	34926098	2		E	E	K	K	K	E	E	K	K	E	E	K	K	K	K	E	E	E	E	K	E	E	E	K	E	E	E	E	E	E	K	E	E	K	K	K	E	K	E	K	E	K	K	E
PsCam000983	34.1127	chr6LG2	34940551	2		E	E	K	K	K	E	E	K	K	E	E	K	K	K	K	E	E	E	E	K	E	E	E	K	E	E	E	E	E	E	K	E	E	K	K	K	E	K	E	K	E	K	K	E
PsCam035497	34.1127	chr6LG2	35422971	2		E	E	K	K	K	E	E	K	K	E	E	K	K	K	K	E	E	E	E	K	E	E	E	K	E	E	E	E	E	E	K	E	E	K	K	K	E	K	E	K	E	K	K	E
PsCam004661	34.1127	chr6LG2	35277080	2		E	E	K	K	K	E	E	K	K	E	E	K	K	K	K	E	E	E	E	K	E	E	E	K	E	E	E	E	E	E	K	E	E	K	K	K	E	K	E	K	E	K	K	E
PsCam042337	34.1127	chr6LG2	36267774	2		E	E	K	K	K	E	E	K	K	E	E	K	K	K	K	E	E	E	E	K	E	E	E	K	E	E	E	E	E	E	K	E	E	K	K	K	E	K	E	K	E	K	K	E
PsCam051616	34.1127	chr6LG2	36225930	2		E	E	K	K	K	E	E	K	K	E	E	K	K	K	K	E	E	E	E	K	E	E	E	K	E	E	E	E	E	E	K	E	E	K	K	K	E	K	E	K	E	K	K	E
PsCam036455	34.1127	chr6LG2	36199672	2		E	E	K	K	K	E	E	K	K	E	E	K	K	K	K	E	E	E	E	K	E	E	E	K	E	E	E	E	E	E	K	E	E	K	K	K	E	K	E	K	E	K	K	E
PsCam023140	34.1127	chr6LG2	36796907	2		E	E	K	K	K	E	E	K	K	E	E	K	K	K	K	E	E	E	E	K	E	E	E	K	E	E	E	E	E	E	K	E	E	K	K	K	E	K	E	K	E	K	E	E
PsCam017183	34.1127	chr6LG2	36945783	2		-	-	-	-	-	-	-	-	-	-	-	-	-	-	-	-	-	-	-	-	-	-	-	-	-	-	-	-	-	-	-	-	-	-	-	-	-	-	-	-	-	-	-	-
PsCam049431	34.1127	chr6LG2	36991664	2		E	E	K	K	K	E	E	K	K	E	E	K	K	K	K	E	E	E	E	K	E	E	E	K	E	E	E	E	E	E	K	E	E	K	K	K	E	K	E	K	E	K	E	E
PsCam049631	34.1127	chr6LG2	35516388	2		E	E	K	K	K	E	E	K	K	E	E	K	K	K	K	E	E	E	E	K	E	E	E	K	E	E	E	E	E	E	K	E	E	K	K	K	E	K	E	K	E	K	E	E
PsCam045308	34.2336	chr6LG2	36411898	2		E	E	K	K	K	E	E	K	K	E	E	K	K	K	K	E	E	E	E	K	E	E	E	K	E	E	E	E	E	E	K	E	E	K	K	K	E	K	E	K	E	K	E	E
PsCam035470	34.2336	chr6LG2	37238031	2		E	E	K	K	K	E	E	K	K	E	E	K	K	K	K	E	E	E	E	K	E	E	E	K	E	E	E	E	E	E	K	E	E	K	K	K	E	K	E	K	E	K	E	E
PsCam054928	34.2336	chr6LG2	37268201	2		E	E	K	K	K	E	E	K	K	E	E	K	K	K	K	E	E	E	E	K	E	E	E	K	E	E	E	E	E	E	K	E	E	K	K	K	E	K	E	K	E	K	E	E
PsCam031145	34.2336	chr6LG2	37285513	2		E	E	K	K	K	E	E	K	K	E	E	K	K	K	K	E	E	E	E	K	E	E	E	K	E	E	E	E	E	E	K	E	E	K	K	K	E	K	E	K	E	K	E	E
PsCam038414	34.2336	chr6LG2	37300094	2		-	-	-	-	-	-	-	-	-	-	-	-	-	-	-	-	-	-	-	-	-	-	-	-	-	-	-	-	-	-	-	-	-	-	-	-	-	-	-	-	-	-	-	-
PsCam044025	34.2336	chr6LG2	37683157	2		E	E	K	K	K	E	E	K	K	E	E	K	K	K	K	E	E	E	E	K	E	E	E	K	E	E	E	E	E	E	K	E	E	K	K	K	E	K	E	K	E	K	E	E
PsCam043236	34.4805	scaffold03407	55559	2		E	E	K	K	K	E	E	K	K	E	E	K	K	K	K	E	E	E	E	K	E	E	E	K	E	E	E	E	E	E	K	E	E	K	K	K	E	K	E	K	E	K	E	E
PsCam000573	34.4805	chr6LG2	37960386	2		E	E	K	K	K	E	E	K	K	E	E	K	K	K	K	E	E	E	E	K	E	E	E	K	E	E	E	E	E	E	K	E	E	K	K	K	E	K	E	K	E	K	E	E
PsCam040146	34.4805	chr6LG2	38025195	2		E	E	K	K	K	E	E	K	K	E	E	K	K	K	K	E	E	E	E	K	E	E	E	K	E	E	E	E	E	E	K	E	E	K	K	K	E	K	E	K	E	K	E	E
PsCam051418	34.4805	chr6LG2	38181381	2		E	E	K	K	K	E	E	K	K	E	E	K	K	K	K	E	E	E	E	K	E	E	E	K	E	E	E	E	E	E	K	E	E	K	K	K	E	K	E	K	E	K	E	E
PsCam000225	34.4805	chr6LG2	38188385	2		E	E	K	K	K	E	E	K	K	E	E	K	K	K	K	E	E	E	E	K	E	E	E	K	E	E	E	E	E	E	K	E	E	K	K	K	E	K	E	K	E	K	E	E
PsCam004192	34.6012	chr6LG2	38957555	2		E	E	K	K	K	E	E	K	K	E	E	K	K	K	K	E	E	E	E	K	E	E	E	K	E	E	E	E	E	E	K	E	E	K	K	K	E	K	E	K	E	K	E	E
PsCam002065	34.6012	chr6LG2	38972090	2		E	E	K	K	K	E	E	K	K	E	E	K	K	K	K	E	E	E	E	K	E	E	E	K	E	E	E	E	E	E	K	E	E	K	K	K	E	K	E	K	E	K	E	E
PsCam007248	34.6012	chr6LG2	38979836	2		E	E	K	K	K	E	E	K	K	E	E	K	K	K	K	E	E	E	E	K	E	E	E	K	E	E	E	E	E	E	K	E	E	K	K	K	E	K	E	K	E	K	E	E
PsCam020987	34.6012	chr6LG2	39176965	2		E	E	K	K	K	E	E	K	K	E	E	K	K	K	K	E	E	E	E	K	E	E	E	K	E	E	E	E	E	E	K	E	E	K	K	K	E	K	E	K	E	K	E	E
PsCam025426	34.6012	chr6LG2	39206886	2		E	E	K	K	K	E	E	K	K	E	E	K	K	K	K	E	E	E	E	K	E	E	E	K	E	E	E	E	E	E	K	E	E	K	K	K	E	K	E	K	E	K	E	E
PsCam039542	34.6012	chr6LG2	39305166	2		E	E	K	K	K	E	E	K	K	E	E	K	K	K	K	E	E	E	E	K	E	E	E	K	E	E	E	E	E	E	K	E	E	K	K	K	E	K	E	K	E	K	E	E
PsCam027565	34.8457	chr6LG2	39609458	2		E	E	K	K	K	E	E	K	K	E	E	K	K	K	K	E	E	E	E	K	E	E	E	K	E	E	E	E	E	E	K	E	E	K	K	K	E	K	E	K	E	K	E	-
PsCam038871	34.8457	chr6LG2	39791386	2		E	E	K	K	K	E	E	K	K	E	E	K	K	-	K	E	E	E	E	-	E	E	E	K	E	E	E	E	E	E	K	E	E	K	K	K	E	K	E	K	E	K	E	E
PsCam015053	34.8457	chr6LG2	39728910	2		E	E	K	K	K	E	E	K	K	E	E	K	K	K	K	E	E	E	E	K	E	E	E	K	E	E	E	E	E	E	K	E	E	K	K	K	E	K	E	K	E	K	E	E
PsCam031445	34.8457	chr6LG2	39684444	2		E	E	K	K	K	E	E	K	K	E	E	K	K	K	K	E	E	E	E	K	E	E	E	K	E	E	E	E	E	E	K	E	E	K	K	K	E	K	E	K	E	K	E	E
PsCam038094	34.8457	chr6LG2	39629640	2		E	E	K	K	K	E	E	K	K	E	E	K	K	K	K	E	E	E	E	K	E	E	E	K	E	E	E	E	E	E	K	E	E	K	K	K	E	K	E	K	E	K	E	E
PsCam052471	34.8457	chr6LG2	40092741	2		E	E	K	K	K	E	E	K	K	E	E	K	K	K	K	E	E	E	E	K	E	E	E	K	E	E	E	E	E	E	K	E	E	K	K	K	E	K	E	K	E	K	E	E
PsCam048052	34.8457	chr6LG2	40092712	2		E	E	K	K	K	E	E	K	K	E	E	K	K	K	K	E	E	E	E	K	E	E	E	K	E	E	E	E	E	E	K	E	E	K	K	K	E	K	E	K	E	K	E	E
PsCam039324	35.3335	chr6LG2	41224229	2		E	E	K	K	K	E	E	K	K	E	E	K	K	K	K	E	E	E	E	K	E	E	E	K	E	E	E	E	E	E	K	E	E	K	K	K	E	K	E	K	E	K	E	E
PsCam048189	35.3335	chr6LG2	41432873	2		E	E	K	K	K	E	E	K	K	E	E	K	K	K	K	E	E	E	E	K	E	E	E	K	E	E	E	E	E	E	K	E	E	K	K	K	E	K	E	K	E	K	E	E
PsCam045748	35.3335	chr6LG2	41481065	2		E	E	K	K	K	E	E	K	K	E	E	K	K	K	K	E	E	E	E	K	E	E	E	K	E	E	E	E	E	E	K	E	E	K	K	K	E	K	E	K	E	K	E	E
PsCam007105	35.3335	chr6LG2	41496251	2		E	E	K	K	K	E	E	K	K	E	E	K	K	K	K	E	E	E	E	K	E	E	E	K	E	E	E	E	E	E	K	E	E	K	K	K	E	K	E	K	E	K	E	E
PsCam047224	35.3335	chr6LG2	41548992	2		E	E	K	K	K	E	E	K	K	E	E	K	K	K	K	E	E	E	E	K	E	E	E	K	E	E	E	E	E	E	K	E	E	K	K	K	E	K	E	K	E	K	E	E
PsCam004820	35.3335	chr6LG2	41588414	2		E	E	K	K	K	E	E	K	K	E	E	K	K	K	K	E	E	E	E	K	E	E	E	K	E	E	E	E	E	E	K	E	E	K	K	K	E	K	E	K	E	K	E	E
PsCam046772	35.3335	chr6LG2	41734263	2		E	E	K	K	K	E	E	K	K	E	E	K	K	K	K	E	E	E	E	K	E	E	E	K	E	E	E	E	E	E	K	E	E	K	K	K	E	K	E	K	E	K	E	E
PsCam052799	35.3335	chr6LG2	40761023	2		E	E	K	K	K	E	E	K	K	E	E	K	K	K	K	E	E	E	E	K	E	E	E	K	E	E	E	E	E	E	K	E	E	K	K	K	E	K	E	K	E	K	E	E
PsCam007611	35.3335	chr6LG2	42046901	2		E	E	K	K	K	E	E	K	K	E	E	K	K	K	K	E	E	E	E	K	E	E	E	K	E	E	E	E	E	E	K	E	E	K	K	K	E	K	E	K	E	K	E	E
PsCam003997	35.3335	chr6LG2	40996506	2		E	E	K	K	K	E	E	K	K	E	E	K	K	K	K	E	E	E	E	K	E	E	E	K	E	E	E	E	E	E	K	E	E	K	K	K	E	K	E	K	E	K	E	E
PsCam000617	35.3335	chr6LG2	40995396	2		E	E	K	K	K	E	E	K	K	E	E	K	K	K	K	E	E	E	E	K	E	E	E	K	E	E	E	E	E	E	K	E	E	K	K	K	E	K	E	K	E	K	E	E
PsCam059361	35.3335	chr6LG2	42173453	2		E	E	K	K	K	E	E	K	K	E	E	K	K	K	K	E	E	E	E	K	E	E	E	K	E	E	E	E	E	E	K	E	E	K	K	K	E	K	E	K	E	K	E	E
PsCam049128	35.3335	chr6LG2	42241148	2		E	E	K	K	K	E	E	K	K	E	E	K	K	K	K	E	E	E	E	K	E	E	E	K	E	E	E	E	E	E	K	E	E	K	K	K	E	K	E	K	E	K	E	E
PsCam009518	35.4541	chr6LG2	42405609	2		E	E	K	K	K	E	E	K	K	E	E	K	K	K	K	E	E	E	E	K	E	E	E	K	E	E	E	E	E	E	K	E	E	K	K	K	E	K	E	K	E	K	E	E
PsCam050773	35.4541	chr6LG2	42488287	2		E	E	K	K	K	E	E	K	K	E	E	K	K	K	K	E	E	E	E	K	E	E	E	K	E	E	E	E	E	E	K	E	E	K	K	K	E	K	E	K	E	K	E	E
PsCam000760	35.4541	chr6LG2	42609046	2		E	E	K	K	K	E	E	K	K	E	E	K	K	K	K	E	E	E	E	K	E	E	E	K	E	E	E	E	E	E	K	E	E	K	K	K	E	K	E	K	E	K	E	E
PsCam034550	35.4541	chr6LG2	42642064	2		E	E	K	K	K	E	E	K	K	E	E	K	K	K	K	E	E	E	E	K	E	E	E	K	E	E	E	E	E	E	K	E	E	K	K	K	E	K	E	K	E	K	E	E
PsCam034782	35.4541	chr6LG2	42649594	2		E	E	K	K	K	E	E	K	K	E	E	K	K	K	K	E	E	E	E	K	E	E	E	K	E	E	E	E	E	E	K	E	E	K	K	K	E	K	E	K	E	K	E	E
PsCam056518	35.4541	chr6LG2	42725688	2		E	E	K	K	K	E	E	K	K	E	E	K	K	K	K	E	E	E	E	K	E	E	E	K	E	E	E	E	E	E	K	E	E	K	K	K	E	K	E	K	E	K	E	E
PsCam043397	35.4541	chr6LG2	42764565	2		E	E	K	K	K	E	E	K	K	E	E	K	K	K	K	E	E	E	E	K	E	E	E	K	E	E	E	E	E	E	K	E	E	K	K	K	E	K	E	K	E	K	E	E
PsCam025471	35.4541	chr6LG2	42776666	2		E	E	K	K	K	E	E	K	K	E	E	K	K	K	K	E	E	E	E	K	E	E	E	K	E	E	E	E	E	E	K	E	E	K	K	K	E	K	E	K	E	K	E	E
PsCam051097	35.4541	chr6LG2	42860167	2		E	E	K	K	K	E	E	K	K	E	E	K	K	K	K	E	E	E	E	K	E	E	E	K	E	E	E	E	E	E	K	E	E	K	K	K	E	K	E	K	E	K	E	E
PsCam041942	35.8195	chr6LG2	43091950	2		E	E	K	K	K	E	E	K	K	E	E	K	K	K	K	E	E	E	E	K	E	E	E	K	E	E	E	E	E	E	K	E	E	K	K	K	E	K	E	K	E	K	E	E
PsCam001674	35.8195	chr6LG2	43942280	2		E	E	K	K	K	E	E	K	K	E	E	K	K	K	K	E	E	E	E	K	E	E	E	K	E	E	E	E	E	E	K	E	E	K	K	K	E	K	E	K	E	K	E	E
PsCam059896	36.0622	chr6LG2	44064917	2		E	E	K	K	K	E	E	K	K	E	E	K	K	K	K	E	E	E	E	K	E	E	E	K	E	E	E	E	E	E	K	E	E	K	K	K	E	K	E	K	K	K	E	E
PsCam058041	36.3044	chr6LG2	43384606	2		E	E	K	K	K	E	E	K	K	E	E	K	K	K	K	E	E	E	E	K	E	E	E	K	E	E	E	E	E	E	K	E	E	K	K	K	E	K	E	K	K	K	E	E
PsCam035453	36.5465	chr6LG2	43484929	2		E	E	K	K	K	E	E	K	K	E	E	K	K	K	K	E	E	E	E	K	E	E	E	K	E	E	E	E	E	E	K	E	E	K	K	K	E	K	E	K	K	K	E	E
PsCam038303	36.6671	chr6LG2	43692155	2		E	E	K	K	K	E	E	K	K	E	E	K	K	K	K	E	E	E	E	K	E	E	E	K	E	E	E	E	E	E	K	E	E	K	K	K	E	K	E	K	K	K	E	E
PsCam042757	36.6671	chr6LG2	43822337	2		E	E	K	K	K	E	E	K	K	E	E	K	K	K	K	E	E	E	E	K	E	E	E	K	E	E	E	E	E	E	K	E	E	K	K	K	E	K	E	K	K	K	E	E
PsCam036758	36.6671	chr6LG2	44354737	2		E	E	K	K	K	E	E	K	K	E	E	K	K	K	K	E	E	E	E	K	E	E	E	K	E	E	E	E	E	E	K	E	E	K	K	K	E	K	E	K	K	K	E	E
PsCam036691	36.6671	chr6LG2	44403806	2		E	E	K	K	K	E	E	K	K	E	E	K	K	K	K	E	E	E	E	K	E	E	E	K	E	E	E	E	E	E	K	E	E	K	K	K	E	K	E	K	K	K	E	E
PsCam026939	36.6671	chr6LG2	44600297	2		E	E	K	K	K	E	E	K	K	E	E	K	K	K	K	E	E	E	E	K	E	E	E	K	E	E	E	E	E	E	K	E	E	K	K	K	E	K	E	K	K	K	E	E
PsCam000628	36.6671	chr6LG2	44741546	2		E	E	K	K	K	E	E	K	K	E	E	K	K	K	K	E	E	E	E	K	E	E	E	K	E	E	E	E	E	E	K	E	E	K	K	K	E	K	E	K	K	K	E	E
PsCam037315	36.6671	chr6LG2	44718265	2		E	E	K	K	K	E	E	K	K	E	E	K	K	K	K	E	E	E	E	K	E	E	E	K	E	E	E	E	E	E	K	E	E	K	K	K	E	K	E	K	K	K	E	E
PsCam000566	36.6671	scaffold01394	34783	2		E	E	K	K	K	E	E	K	K	E	E	K	K	K	K	E	E	E	E	K	E	E	E	K	E	E	E	E	E	E	K	E	E	K	K	K	E	K	E	K	K	K	E	E
PsCam045908	37.0316	chr6LG2	45084196	2		E	E	K	K	K	E	E	K	K	E	E	K	K	K	K	E	E	E	E	K	E	E	E	K	E	E	E	E	E	E	K	E	E	K	K	K	E	K	E	K	K	K	E	E
PsCam000747	37.0316	chr6LG2	45312127	2		E	E	K	K	K	E	E	K	K	E	E	K	K	K	K	E	E	E	E	K	E	E	E	K	E	E	E	E	E	E	K	E	E	K	K	K	E	K	E	K	K	K	E	E
PsCam059038	37.0316	chr6LG2	45381632	2		E	E	K	K	K	E	E	K	K	E	E	K	K	K	K	E	E	E	E	K	E	E	E	K	E	E	E	E	E	E	K	E	E	K	K	K	E	K	E	K	K	K	E	E
PsCam005783	37.0316	chr6LG2	45386029	2		E	E	K	K	K	E	E	K	K	E	E	K	K	K	K	E	E	E	E	K	E	E	E	K	E	E	E	E	E	E	K	E	E	K	K	K	E	K	E	K	K	K	E	E
PsCam056071	37.1523	chr6LG2	44859491	2		E	E	K	K	K	E	E	K	K	E	E	K	K	K	K	E	E	E	E	K	E	E	E	K	E	E	E	E	E	E	K	E	E	K	K	K	E	K	E	K	K	K	K	E
PsCam040329	37.1523	chr6LG2	46117769	2		E	E	K	K	K	E	E	K	K	E	E	K	K	K	K	E	E	E	E	K	E	E	E	K	E	E	E	E	E	E	K	E	E	K	K	K	E	K	E	K	K	K	K	E
PsCam001782	37.1523	chr6LG2	46006233	2		E	E	K	K	K	E	E	K	K	E	E	K	K	K	K	E	E	E	E	K	E	E	E	K	E	E	E	E	E	E	K	E	E	K	K	K	E	K	E	K	K	K	K	E
PsCam046575	37.6401	chr6LG2	46393782	2		E	E	K	K	K	E	E	K	K	E	E	K	K	K	K	E	E	E	E	K	E	E	E	K	E	E	E	E	E	E	K	E	E	K	K	K	E	K	E	K	K	K	K	E
PsCam007893	37.6401	chr6LG2	46683178	2		E	E	K	K	K	E	E	K	K	E	E	K	K	K	K	E	E	E	E	K	E	E	E	K	E	E	E	E	E	E	K	E	E	K	K	K	E	K	E	K	K	K	K	E
PsCam060191	37.6401	chr6LG2	46830816	2		E	E	K	K	K	E	E	K	K	E	E	K	K	K	K	E	-	E	E	K	E	E	E	K	E	E	E	E	E	E	K	E	E	K	K	K	E	K	E	K	K	K	K	E
PsCam037848	37.9156	chr6LG2	47041951	2		-	-	-	-	-	-	-	-	-	-	-	-	-	-	-	-	-	-	-	-	-	-	-	-	-	-	-	-	-	-	-	-	-	-	-	-	-	-	-	-	-	-	-	-
PsCam035889	37.9156	chr6LG2	47049398	2		-	-	-	-	-	-	-	-	-	-	-	-	-	-	-	-	-	-	-	-	-	-	-	-	-	-	-	-	-	-	-	-	-	-	-	-	-	-	-	-	-	-	-	-
PsCam045980	38.6385	chr6LG2	48578234	2		E	K	K	K	K	E	E	K	K	E	E	K	K	K	K	E	E	E	E	K	E	E	E	K	E	E	E	E	E	E	K	E	E	K	K	K	E	K	E	K	K	K	K	E
PsCam048817	38.7591	chr6LG2	47952976	2		E	K	K	K	K	E	E	K	K	E	E	K	E	K	K	E	E	E	E	K	E	E	E	K	E	E	E	E	E	E	K	E	E	K	K	K	E	K	E	K	K	K	K	E
PsCam018219	38.7591	chr6LG2	47960086	2		E	K	K	K	K	E	E	K	K	E	E	K	E	K	K	E	E	E	E	K	E	E	E	K	E	E	E	E	E	E	K	E	E	K	K	K	E	K	E	K	K	K	K	E
PsCam036986	38.7591	chr6LG2	51016601	2		E	K	K	K	K	E	E	K	K	E	E	K	E	K	K	E	E	E	E	K	E	E	E	K	E	E	E	E	E	E	K	E	E	K	K	K	E	K	E	K	K	K	K	E
PsCam049084	38.7591	chr6LG2	51001817	2		E	K	K	K	K	E	E	K	K	E	E	K	E	K	K	E	E	E	E	K	E	E	E	K	E	E	E	E	E	E	K	E	E	K	K	K	E	K	E	K	K	K	K	E
PsCam048775	38.7591	chr6LG2	50474011	2		-	-	-	-	-	-	-	-	-	-	-	-	-	-	-	-	-	-	-	-	-	-	-	-	-	-	-	-	-	-	-	-	-	-	-	-	-	-	-	-	-	-	-	-
PsCam037229	38.7591	chr6LG2	50976606	2		-	-	-	-	-	-	-	-	-	-	-	-	-	-	-	-	-	-	-	-	-	-	-	-	-	-	-	-	-	-	-	-	-	-	-	-	-	-	-	-	-	-	-	-
PsCam007533	39.0243	chr6LG2	48937289	2		E	K	K	K	K	E	E	K	K	E	E	K	E	K	K	E	E	E	E	K	E	E	E	K	E	E	E	E	E	E	K	E	E	K	K	K	E	K	E	K	K	K	K	E
PsCam023105	39.0243	chr6LG2	51458449	2		-	-	-	-	-	-	-	-	-	-	-	-	-	-	-	-	-	-	-	-	-	-	-	-	-	-	-	-	-	-	-	-	-	-	-	-	-	-	-	-	-	-	-	-
PsCam051958	39.1464	chr6LG2	52037746	2		-	-	-	-	-	-	-	-	-	-	-	-	-	-	-	-	-	-	-	-	-	-	-	-	-	-	-	-	-	-	-	-	-	-	-	-	-	-	-	-	-	-	-	-
PsCam017866	39.2685	chr6LG2	52061024	2		-	-	-	-	-	-	-	-	-	-	-	-	-	-	-	-	-	-	-	-	-	-	-	-	-	-	-	-	-	-	-	-	-	-	-	-	-	-	-	-	-	-	-	-
PsCam036546	39.5136	chr6LG2	52839064	2		-	-	-	-	-	-	-	-	-	-	-	-	-	-	-	-	-	-	-	-	-	-	-	-	-	-	-	-	-	-	-	-	-	-	-	-	-	-	-	-	-	-	-	-
PsCam011025	39.5136	chr6LG2	52976099	2		-	-	-	-	-	-	-	-	-	-	-	-	-	-	-	-	-	-	-	-	-	-	-	-	-	-	-	-	-	-	-	-	-	-	-	-	-	-	-	-	-	-	-	-
PsCam051172	39.5136	chr6LG2	54444335	2		-	-	-	-	-	-	-	-	-	-	-	-	-	-	-	-	-	-	-	-	-	-	-	-	-	-	-	-	-	-	-	-	-	-	-	-	-	-	-	-	-	-	-	-
PsCam034662	39.5136	chr6LG2	54970283	2		-	-	-	-	-	-	-	-	-	-	-	-	-	-	-	-	-	-	-	-	-	-	-	-	-	-	-	-	-	-	-	-	-	-	-	-	-	-	-	-	-	-	-	-
PsCam043468	39.5136	chr6LG2	54961215	2		E	K	K	K	K	E	E	K	K	E	E	K	E	K	K	E	E	E	E	K	E	E	E	K	E	E	E	E	E	E	K	E	E	K	K	K	E	K	E	K	K	K	K	E
PsCam044468	39.5136	chr6LG2	54954748	2		-	-	-	-	-	-	-	-	-	-	-	-	-	-	-	-	-	-	-	-	-	-	-	-	-	-	-	-	-	-	-	-	-	-	-	-	-	-	-	-	-	-	-	-
PsCam051850	39.5136	chr6LG2	54950707	2		E	K	K	K	K	E	E	K	K	E	E	K	E	K	K	E	E	E	E	K	E	E	E	K	E	E	E	E	E	E	K	E	E	K	K	K	E	K	E	K	K	K	K	E
PsCam049930	39.5136	chr6LG2	54733546	2		-	-	-	-	-	-	-	-	-	-	-	-	-	-	-	-	-	-	-	-	-	-	-	-	-	-	-	-	-	-	-	-	-	-	-	-	-	-	-	-	-	-	-	-
PsCam021742	39.5136	chr6LG2	54610334	2		E	K	K	K	K	E	E	K	K	E	E	K	E	K	K	E	E	E	E	K	E	E	E	K	E	E	E	E	E	E	K	E	E	K	K	K	E	K	E	K	K	K	K	E
PsCam046169	39.5136	chr6LG2	53107423	2		E	K	K	K	K	E	E	K	K	E	E	K	E	K	K	E	E	E	E	K	E	E	E	K	E	E	E	E	E	E	K	E	E	K	K	K	E	K	E	K	K	K	K	E
PsCam043523	39.5136	chr6LG2	37030769	2		-	-	-	-	-	-	-	-	-	-	-	-	-	-	-	-	-	-	-	-	-	-	-	-	-	-	-	-	-	-	-	-	-	-	-	-	-	-	-	-	-	-	-	-
PsCam053666	39.5136	chr6LG2	37149964	2		-	-	-	-	-	-	-	-	-	-	-	-	-	-	-	-	-	-	-	-	-	-	-	-	-	-	-	-	-	-	-	-	-	-	-	-	-	-	-	-	-	-	-	-
PsCam023581	39.5136	chr6LG2	55740326	2		E	K	K	K	K	E	E	K	K	E	E	K	E	K	K	E	E	E	E	K	E	E	E	E	E	E	E	E	E	E	K	E	E	K	K	K	E	K	E	K	K	K	K	E
PsCam002047	39.5136	chr6LG2	56118942	2		E	K	K	K	K	E	E	K	K	E	E	K	E	K	K	E	E	E	E	K	E	E	E	E	E	E	E	E	E	E	K	E	E	K	K	K	E	K	E	K	K	K	K	E
PsCam002692	40.0136	chr6LG2	56522908	2		E	K	K	K	K	E	E	K	K	E	E	K	E	K	K	E	E	E	E	K	E	E	E	E	E	E	E	E	K	K	K	E	E	K	K	K	E	K	E	K	K	K	K	E
PsCam007377	40.0136	chr6LG2	56646163	2		E	K	K	K	K	E	K	K	K	E	E	K	E	K	K	E	E	E	E	K	E	E	E	E	E	E	E	E	K	K	K	E	E	K	K	K	E	K	E	K	K	K	K	E
PsCam034206	40.0136	chr6LG2	59540631	2		-	-	-	-	-	-	-	-	-	-	-	-	-	-	-	-	-	-	-	-	-	-	-	-	-	-	-	-	-	-	-	-	-	-	-	-	-	-	-	-	-	-	-	-
PsCam006607	40.0136	scaffold04441	12047	2		E	K	K	K	K	E	K	K	K	E	E	K	E	K	K	E	E	E	E	K	E	E	E	E	E	E	E	E	K	K	K	E	E	K	K	K	E	K	E	K	K	K	K	E
PsCam005844	40.0136	chr6LG2	56905305	2		-	-	-	-	-	-	-	-	-	-	-	-	-	-	-	-	-	-	-	-	-	-	-	-	-	-	-	-	-	-	-	-	-	-	-	-	-	-	-	-	-	-	-	-
PsCam053332	40.0136	chr6LG2	56938443	2		-	-	-	-	-	-	-	-	-	-	-	-	-	-	-	-	-	-	-	-	-	-	-	-	-	-	-	-	-	-	-	-	-	-	-	-	-	-	-	-	-	-	-	-
PsCam056246	40.0136	chr6LG2	56943645	2		-	-	-	-	-	-	-	-	-	-	-	-	-	-	-	-	-	-	-	-	-	-	-	-	-	-	-	-	-	-	-	-	-	-	-	-	-	-	-	-	-	-	-	-
PsCam046569	40.0136	chr6LG2	58169535	2		-	-	-	-	-	-	-	-	-	-	-	-	-	-	-	-	-	-	-	-	-	-	-	-	-	-	-	-	-	-	-	-	-	-	-	-	-	-	-	-	-	-	-	-
PsCam021786	40.0136	chr6LG2	57142494	2		-	-	-	-	-	-	-	-	-	-	-	-	-	-	-	-	-	-	-	-	-	-	-	-	-	-	-	-	-	-	-	-	-	-	-	-	-	-	-	-	-	-	-	-
PsCam006730	40.3836	chr6LG2	60660416	2		-	-	-	-	-	-	-	-	-	-	-	-	-	-	-	-	-	-	-	-	-	-	-	-	-	-	-	-	-	-	-	-	-	-	-	-	-	-	-	-	-	-	-	-
PsCam027189	40.3836	chr6LG2	60185248	2		-	-	-	-	-	-	-	-	-	-	-	-	-	-	-	-	-	-	-	-	-	-	-	-	-	-	-	-	-	-	-	-	-	-	-	-	-	-	-	-	-	-	-	-
PsCam046480	40.3836	scaffold02824	8386	2		-	-	-	-	-	-	-	-	-	-	-	-	-	-	-	-	-	-	-	-	-	-	-	-	-	-	-	-	-	-	-	-	-	-	-	-	-	-	-	-	-	-	-	-
PsCam002810	40.3836	chr6LG2	62977583	2		-	-	-	-	-	-	-	-	-	-	-	-	-	-	-	-	-	-	-	-	-	-	-	-	-	-	-	-	-	-	-	-	-	-	-	-	-	-	-	-	-	-	-	-
PsCam045230	40.5057	chr6LG2	63460001	2		-	-	-	-	-	-	-	-	-	-	-	-	-	-	-	-	-	-	-	-	-	-	-	-	-	-	-	-	-	-	-	-	-	-	-	-	-	-	-	-	-	-	-	-
PsCam023211	40.5057	chr6LG2	63912622	2		-	-	-	-	-	-	-	-	-	-	-	-	-	-	-	-	-	-	-	-	-	-	-	-	-	-	-	-	-	-	-	-	-	-	-	-	-	-	-	-	-	-	-	-
PsCam035394	40.5057	chr6LG2	64233000	2		-	-	-	-	-	-	-	-	-	-	-	-	-	-	-	-	-	-	-	-	-	-	-	-	-	-	-	-	-	-	-	-	-	-	-	-	-	-	-	-	-	-	-	-
PsCam026513	40.5057	chr6LG2	64240340	2		-	-	-	-	-	-	-	-	-	-	-	-	-	-	-	-	-	-	-	-	-	-	-	-	-	-	-	-	-	-	-	-	-	-	-	-	-	-	-	-	-	-	-	-
PsCam026796	40.5057	chr6LG2	64245016	2		-	-	-	-	-	-	-	-	-	-	-	-	-	-	-	-	-	-	-	-	-	-	-	-	-	-	-	-	-	-	-	-	-	-	-	-	-	-	-	-	-	-	-	-
PsCam000889	40.6278	chr6LG2	63652691	2		-	-	-	-	-	-	-	-	-	-	-	-	-	-	-	-	-	-	-	-	-	-	-	-	-	-	-	-	-	-	-	-	-	-	-	-	-	-	-	-	-	-	-	-
PsCam045549	40.6278	chr6LG2	64583635	2		-	-	-	-	-	-	-	-	-	-	-	-	-	-	-	-	-	-	-	-	-	-	-	-	-	-	-	-	-	-	-	-	-	-	-	-	-	-	-	-	-	-	-	-
PsCam042412	40.6278	chr6LG2	64584134	2		-	-	-	-	-	-	-	-	-	-	-	-	-	-	-	-	-	-	-	-	-	-	-	-	-	-	-	-	-	-	-	-	-	-	-	-	-	-	-	-	-	-	-	-
PsCam027280	40.6278	chr6LG2	64677840	2		-	-	-	-	-	-	-	-	-	-	-	-	-	-	-	-	-	-	-	-	-	-	-	-	-	-	-	-	-	-	-	-	-	-	-	-	-	-	-	-	-	-	-	-
PsCam050802	40.6278	chr6LG2	64693519	2		-	-	-	-	-	-	-	-	-	-	-	-	-	-	-	-	-	-	-	-	-	-	-	-	-	-	-	-	-	-	-	-	-	-	-	-	-	-	-	-	-	-	-	-
PsCam045780	40.6278	chr6LG2	64700568	2		-	-	-	-	-	-	-	-	-	-	-	-	-	-	-	-	-	-	-	-	-	-	-	-	-	-	-	-	-	-	-	-	-	-	-	-	-	-	-	-	-	-	-	-
PsCam050810	40.6278	chr6LG2	65305156	2		-	-	-	-	-	-	-	-	-	-	-	-	-	-	-	-	-	-	-	-	-	-	-	-	-	-	-	-	-	-	-	-	-	-	-	-	-	-	-	-	-	-	-	-
PsCam002956	40.6278	chr6LG2	65306238	2		-	-	-	-	-	-	-	-	-	-	-	-	-	-	-	-	-	-	-	-	-	-	-	-	-	-	-	-	-	-	-	-	-	-	-	-	-	-	-	-	-	-	-	-
PsCam034521	40.7499	chr6LG2	65332903	2		-	-	-	-	-	-	-	-	-	-	-	-	-	-	-	-	-	-	-	-	-	-	-	-	-	-	-	-	-	-	-	-	-	-	-	-	-	-	-	-	-	-	-	-
PsCam035673	40.872	chr6LG2	65888036	2		-	-	-	-	-	-	-	-	-	-	-	-	-	-	-	-	-	-	-	-	-	-	-	-	-	-	-	-	-	-	-	-	-	-	-	-	-	-	-	-	-	-	-	-
PsCam016877	40.872	chr6LG2	65909284	2		-	-	-	-	-	-	-	-	-	-	-	-	-	-	-	-	-	-	-	-	-	-	-	-	-	-	-	-	-	-	-	-	-	-	-	-	-	-	-	-	-	-	-	-
PsCam017622	40.9941	chr6LG2	67470726	2		-	-	-	-	-	-	-	-	-	-	-	-	-	-	-	-	-	-	-	-	-	-	-	-	-	-	-	-	-	-	-	-	-	-	-	-	-	-	-	-	-	-	-	-
PsCam052370	40.9941	chr6LG2	67428982	2		-	-	-	-	-	-	-	-	-	-	-	-	-	-	-	-	-	-	-	-	-	-	-	-	-	-	-	-	-	-	-	-	-	-	-	-	-	-	-	-	-	-	-	-
PsCam036373	40.9941	chr6LG2	66831266	2		-	-	-	-	-	-	-	-	-	-	-	-	-	-	-	-	-	-	-	-	-	-	-	-	-	-	-	-	-	-	-	-	-	-	-	-	-	-	-	-	-	-	-	-
PsCam001585	42.26	chr6LG2	68887570	2		-	-	-	-	-	-	-	-	-	-	-	-	-	-	-	-	-	-	-	-	-	-	-	-	-	-	-	-	-	-	-	-	-	-	-	-	-	-	-	-	-	-	-	-
PsCam045420	42.26	chr6LG2	69149180	2		-	-	-	-	-	-	-	-	-	-	-	-	-	-	-	-	-	-	-	-	-	-	-	-	-	-	-	-	-	-	-	-	-	-	-	-	-	-	-	-	-	-	-	-
PsCam037741	42.26	chr6LG2	69164021	2		-	-	-	-	-	-	-	-	-	-	-	-	-	-	-	-	-	-	-	-	-	-	-	-	-	-	-	-	-	-	-	-	-	-	-	-	-	-	-	-	-	-	-	-
PsCam050404	42.26	chr6LG2	69892772	2		-	-	-	-	-	-	-	-	-	-	-	-	-	-	-	-	-	-	-	-	-	-	-	-	-	-	-	-	-	-	-	-	-	-	-	-	-	-	-	-	-	-	-	-
PsCam000672	42.4975	chr6LG2	69971193	2		-	-	-	-	-	-	-	-	-	-	-	-	-	-	-	-	-	-	-	-	-	-	-	-	-	-	-	-	-	-	-	-	-	-	-	-	-	-	-	-	-	-	-	-
PsCam030485	42.4975	chr6LG2	69783893	2		-	-	-	-	-	-	-	-	-	-	-	-	-	-	-	-	-	-	-	-	-	-	-	-	-	-	-	-	-	-	-	-	-	-	-	-	-	-	-	-	-	-	-	-
PsCam037710	42.4975	chr6LG2	69746328	2		-	-	-	-	-	-	-	-	-	-	-	-	-	-	-	-	-	-	-	-	-	-	-	-	-	-	-	-	-	-	-	-	-	-	-	-	-	-	-	-	-	-	-	-
PsCam040212	42.6196	chr6LG2	70469625	2		-	-	-	-	-	-	-	-	-	-	-	-	-	-	-	-	-	-	-	-	-	-	-	-	-	-	-	-	-	-	-	-	-	-	-	-	-	-	-	-	-	-	-	-
PsCam036822	42.6196	chr6LG2	70482129	2		-	-	-	-	-	-	-	-	-	-	-	-	-	-	-	-	-	-	-	-	-	-	-	-	-	-	-	-	-	-	-	-	-	-	-	-	-	-	-	-	-	-	-	-
PsCam023265	44.28	chr6LG2	81452221	2		-	-	-	-	-	-	-	-	-	-	-	-	-	-	-	-	-	-	-	-	-	-	-	-	-	-	-	-	-	-	-	-	-	-	-	-	-	-	-	-	-	-	-	-
PsCam011874	44.4021	chr6LG2	83556753	2		-	-	-	-	-	-	-	-	-	-	-	-	-	-	-	-	-	-	-	-	-	-	-	-	-	-	-	-	-	-	-	-	-	-	-	-	-	-	-	-	-	-	-	-
PsCam045480	44.4021	chr6LG2	83555453	2		-	-	-	-	-	-	-	-	-	-	-	-	-	-	-	-	-	-	-	-	-	-	-	-	-	-	-	-	-	-	-	-	-	-	-	-	-	-	-	-	-	-	-	-
PsCam048988	44.4021	chr6LG2	84067671	2		-	-	-	-	-	-	-	-	-	-	-	-	-	-	-	-	-	-	-	-	-	-	-	-	-	-	-	-	-	-	-	-	-	-	-	-	-	-	-	-	-	-	-	-
PsCam039396	45.0217	chr6LG2	86465651	2		-	-	-	-	-	-	-	-	-	-	-	-	-	-	-	-	-	-	-	-	-	-	-	-	-	-	-	-	-	-	-	-	-	-	-	-	-	-	-	-	-	-	-	-
PsCam037628	45.0217	chr6LG2	86411724	2		-	-	-	-	-	-	-	-	-	-	-	-	-	-	-	-	-	-	-	-	-	-	-	-	-	-	-	-	-	-	-	-	-	-	-	-	-	-	-	-	-	-	-	-
PsCam036203	45.0217	chr6LG2	86333611	2		-	-	-	-	-	-	-	-	-	-	-	-	-	-	-	-	-	-	-	-	-	-	-	-	-	-	-	-	-	-	-	-	-	-	-	-	-	-	-	-	-	-	-	-
PsCam024466	45.0217	chr6LG2	86333168	2		-	-	-	-	-	-	-	-	-	-	-	-	-	-	-	-	-	-	-	-	-	-	-	-	-	-	-	-	-	-	-	-	-	-	-	-	-	-	-	-	-	-	-	-
PsCam034684	45.1438	chr6LG2	234224123	2		-	-	-	-	-	-	-	-	-	-	-	-	-	-	-	-	-	-	-	-	-	-	-	-	-	-	-	-	-	-	-	-	-	-	-	-	-	-	-	-	-	-	-	-
PsCam001576	45.1438	chr6LG2	234119153	2		-	-	-	-	-	-	-	-	-	-	-	-	-	-	-	-	-	-	-	-	-	-	-	-	-	-	-	-	-	-	-	-	-	-	-	-	-	-	-	-	-	-	-	-
PsCam049649	45.2659	chr6LG2	233708814	2		-	-	-	-	-	-	-	-	-	-	-	-	-	-	-	-	-	-	-	-	-	-	-	-	-	-	-	-	-	-	-	-	-	-	-	-	-	-	-	-	-	-	-	-
PsCam008366	45.388	chr6LG2	233660086	2		-	-	-	-	-	-	-	-	-	-	-	-	-	-	-	-	-	-	-	-	-	-	-	-	-	-	-	-	-	-	-	-	-	-	-	-	-	-	-	-	-	-	-	-
PsCam050475	45.388	chr6LG2	233613888	2		-	-	-	-	-	-	-	-	-	-	-	-	-	-	-	-	-	-	-	-	-	-	-	-	-	-	-	-	-	-	-	-	-	-	-	-	-	-	-	-	-	-	-	-
PsCam029241	45.388	super-scaffold6317	233046	2		-	-	-	-	-	-	-	-	-	-	-	-	-	-	-	-	-	-	-	-	-	-	-	-	-	-	-	-	-	-	-	-	-	-	-	-	-	-	-	-	-	-	-	-
PsCam037747	52.7036	chr6LG2	157771483	2		-	-	-	-	-	-	-	-	-	-	-	-	-	-	-	-	-	-	-	-	-	-	-	-	-	-	-	-	-	-	-	-	-	-	-	-	-	-	-	-	-	-	-	-
PsCam036235	52.7036	chr6LG2	158104604	2		-	-	-	-	-	-	-	-	-	-	-	-	-	-	-	-	-	-	-	-	-	-	-	-	-	-	-	-	-	-	-	-	-	-	-	-	-	-	-	-	-	-	-	-
PsCam049857	52.8263	chr6LG2	158813246	2		-	-	-	-	-	-	-	-	-	-	-	-	-	-	-	-	-	-	-	-	-	-	-	-	-	-	-	-	-	-	-	-	-	-	-	-	-	-	-	-	-	-	-	-
PsCam039747	52.8263	chr6LG2	158813246	2		-	-	-	-	-	-	-	-	-	-	-	-	-	-	-	-	-	-	-	-	-	-	-	-	-	-	-	-	-	-	-	-	-	-	-	-	-	-	-	-	-	-	-	-
PsCam049754	52.8263	chr6LG2	159947638	2		-	-	-	-	-	-	-	-	-	-	-	-	-	-	-	-	-	-	-	-	-	-	-	-	-	-	-	-	-	-	-	-	-	-	-	-	-	-	-	-	-	-	-	-
PsCam004796	53.0714	chr6LG2	161829532	2		-	-	-	-	-	-	-	-	-	-	-	-	-	-	-	-	-	-	-	-	-	-	-	-	-	-	-	-	-	-	-	-	-	-	-	-	-	-	-	-	-	-	-	-
PsCam000652	53.0714	chr6LG2	162214993	2		-	-	-	-	-	-	-	-	-	-	-	-	-	-	-	-	-	-	-	-	-	-	-	-	-	-	-	-	-	-	-	-	-	-	-	-	-	-	-	-	-	-	-	-
PsCam010914	53.4404	chr6LG2	259628251	2		-	-	-	-	-	-	-	-	-	-	-	-	-	-	-	-	-	-	-	-	-	-	-	-	-	-	-	-	-	-	-	-	-	-	-	-	-	-	-	-	-	-	-	-
PsCam027596	53.6873	chr6LG2	259703070	2		-	-	-	-	-	-	-	-	-	-	-	-	-	-	-	-	-	-	-	-	-	-	-	-	-	-	-	-	-	-	-	-	-	-	-	-	-	-	-	-	-	-	-	-
PsCam039881	53.8103	chr6LG2	261409415	2		-	-	-	-	-	-	-	-	-	-	-	-	-	-	-	-	-	-	-	-	-	-	-	-	-	-	-	-	-	-	-	-	-	-	-	-	-	-	-	-	-	-	-	-
PsCam011925	53.8103	chr6LG2	162825167	2		-	-	-	-	-	-	-	-	-	-	-	-	-	-	-	-	-	-	-	-	-	-	-	-	-	-	-	-	-	-	-	-	-	-	-	-	-	-	-	-	-	-	-	-
PsCam037614	54.0554	chr6LG2	262670018	2		-	-	-	-	-	-	-	-	-	-	-	-	-	-	-	-	-	-	-	-	-	-	-	-	-	-	-	-	-	-	-	-	-	-	-	-	-	-	-	-	-	-	-	-
PsCam033633	54.0554	chr6LG2	163852225	2		-	-	-	-	-	-	-	-	-	-	-	-	-	-	-	-	-	-	-	-	-	-	-	-	-	-	-	-	-	-	-	-	-	-	-	-	-	-	-	-	-	-	-	-
PsCam054929	57.07	chr6LG2	170553533	2		E	E	K	K	K	E	K	E	E	E	E	E	E	K	E	E	E	E	E	K	K	E	E	E	E	E	E	E	K	K	K	E	K	K	K	K	K	K	E	E	K	K	K	E
PsCam038565	57.07	chr6LG2	170583513	2		-	-	-	-	-	-	-	-	-	-	-	-	-	-	-	-	-	-	-	-	-	-	-	-	-	-	-	-	-	-	-	-	-	-	-	-	-	-	-	-	-	-	-	-
PsCam036090	57.07	chr6LG2	170589440	2		-	-	-	-	-	-	-	-	-	-	-	-	-	-	-	-	-	-	-	-	-	-	-	-	-	-	-	-	-	-	-	-	-	-	-	-	-	-	-	-	-	-	-	-
PsCam047339	57.07	chr6LG2	172013661	2		-	-	-	-	-	-	-	-	-	-	-	-	-	-	-	-	-	-	-	-	-	-	-	-	-	-	-	-	-	-	-	-	-	-	-	-	-	-	-	-	-	-	-	-
PsCam001847	57.07	chr6LG2	171980075	2		E	E	K	K	K	E	K	E	E	E	E	-	E	K	E	E	E	E	E	K	K	E	E	E	E	E	E	E	K	K	K	E	K	K	K	K	K	K	E	E	K	K	K	E
PsCam039571	57.07	chr6LG2	173038753	2		E	E	K	K	K	E	K	E	E	E	E	-	E	K	E	E	E	E	E	K	K	E	E	E	E	E	E	E	K	K	K	E	K	K	K	K	K	K	E	E	K	K	K	E
PsCam033751	57.07	chr6LG2	173165025	2		-	-	-	-	-	-	-	-	-	-	-	-	-	-	-	-	-	-	-	-	-	-	-	-	-	-	-	-	-	-	-	-	-	-	-	-	-	-	-	-	-	-	-	-
PsCam050226	57.07	chr6LG2	173167248	2		-	-	-	-	-	-	-	-	-	-	-	-	-	-	-	-	-	-	-	-	-	-	-	-	-	-	-	-	-	-	-	-	-	-	-	-	-	-	-	-	-	-	-	-
PsCam046497	57.07	chr6LG2	173232182	2		E	E	K	K	K	E	K	E	E	E	E	E	E	K	E	E	E	E	E	K	K	E	E	E	E	E	E	E	K	K	K	E	K	K	K	K	K	K	E	E	K	K	K	E
PsCam044900	57.07	chr6LG2	480171513	2		E	E	K	K	K	E	K	E	E	E	E	-	E	K	E	E	E	E	E	K	K	E	E	E	E	E	E	E	K	K	K	E	K	K	K	K	K	K	E	E	K	K	K	E
PsCam034816	57.07	chr6LG2	173574757	2		E	E	K	K	K	E	K	E	E	E	E	E	E	K	E	E	E	E	E	K	K	E	E	E	E	E	E	E	K	K	K	E	K	K	K	K	K	K	E	E	K	K	K	E
PsCam038243	57.07	chr6LG2	173602614	2		-	-	-	-	-	-	-	-	-	-	-	-	-	-	-	-	-	-	-	-	-	-	-	-	-	-	-	-	-	-	-	-	-	-	-	-	-	-	-	-	-	-	-	-
PsCam031466	57.07	chr6LG2	174043998	2		-	-	-	-	-	-	-	-	-	-	-	-	-	-	-	-	-	-	-	-	-	-	-	-	-	-	-	-	-	-	-	-	-	-	-	-	-	-	-	-	-	-	-	-
PsCam035306	57.07	chr6LG2	174060533	2		-	-	-	-	-	-	-	-	-	-	-	-	-	-	-	-	-	-	-	-	-	-	-	-	-	-	-	-	-	-	-	-	-	-	-	-	-	-	-	-	-	-	-	-
PsCam049389	57.07	chr6LG2	174778923	2		E	E	K	K	K	E	K	E	E	E	E	-	E	K	E	E	E	E	E	K	K	E	E	E	E	E	E	E	K	K	K	E	K	K	K	K	K	K	E	E	K	K	K	E
PsCam044020	57.07	chr6LG2	174806802	2		E	E	K	K	K	E	K	E	E	E	E	E	E	K	E	E	E	E	E	K	K	E	E	E	E	E	E	E	K	K	K	E	K	K	K	K	K	K	E	E	K	K	K	E
PsCam044924	57.07	chr6LG2	176498561	2		-	-	-	-	-	-	-	-	-	-	-	-	-	-	-	-	-	-	-	-	-	-	-	-	-	-	-	-	-	-	-	-	-	-	-	-	-	-	-	-	-	-	-	-
PsCam033330	57.193	chr6LG2	402303094	2		-	-	-	-	-	-	-	-	-	-	-	-	-	-	-	-	-	-	-	-	-	-	-	-	-	-	-	-	-	-	-	-	-	-	-	-	-	-	-	-	-	-	-	-
PsCam044094	57.4305	chr6LG2	176993119	2		-	-	-	-	-	-	-	-	-	-	-	-	-	-	-	-	-	-	-	-	-	-	-	-	-	-	-	-	-	-	-	-	-	-	-	-	-	-	-	-	-	-	-	-
PsCam039431	57.4305	chr6LG2	175780129	2		E	E	K	K	K	E	K	E	E	E	E	-	E	K	E	E	E	E	E	K	K	E	E	E	E	E	E	E	K	K	K	E	K	K	K	K	K	K	E	E	K	K	K	E
PsCam044104	57.4305	chr6LG2	176959251	2		E	E	K	K	K	E	K	E	E	E	E	-	E	K	E	E	E	E	E	K	K	E	E	E	E	E	E	E	K	K	K	E	K	K	K	K	K	K	E	E	K	K	K	E
PsCam038712	57.9305	chr6LG2	177454293	2		E	E	K	K	K	E	K	E	E	E	E	E	E	K	E	E	E	E	E	K	K	E	E	E	E	E	E	E	K	K	K	E	K	K	K	K	K	K	E	E	K	K	K	E
PsCam032978	58.0512	chr6LG2	177637967	2		E	E	K	K	K	E	K	E	E	E	E	E	E	K	E	E	E	E	E	K	K	E	E	E	E	E	E	E	K	K	K	E	K	K	K	K	K	K	E	E	K	K	K	E
PsCam040759	58.0512	chr6LG2	177640055	2		E	E	K	K	K	E	K	E	E	E	E	E	E	K	E	E	E	E	E	K	K	E	E	E	E	E	E	E	K	K	K	E	K	K	K	K	K	K	E	E	K	K	K	E
PsCam017506	58.1724	chr6LG2	179156277	2		E	E	K	K	K	E	K	E	E	E	E	E	E	K	E	E	E	E	E	K	K	E	E	E	E	E	E	E	K	K	K	E	K	K	K	K	K	K	E	E	K	K	K	E
PsCam051564	58.1724	chr6LG2	178103338	2		E	E	K	K	K	E	K	E	E	E	E	E	E	K	E	E	E	E	E	K	K	E	E	E	E	E	E	E	K	K	K	E	K	K	K	K	K	K	E	E	K	K	K	E
PsCam056560	58.5396	chr6LG2	179233739	2		E	K	K	K	K	E	K	E	E	E	E	-	E	K	E	E	E	E	E	K	K	E	E	E	E	E	E	E	K	K	K	E	K	K	K	K	K	K	E	E	K	K	K	E
PsCam004891	58.7771	chr6LG2	186023850	2		E	K	K	K	K	E	K	E	E	E	E	-	E	K	E	E	E	E	E	K	K	E	E	E	E	K	E	E	K	K	K	E	K	K	K	K	K	K	E	E	K	K	K	E
PsCam028277	58.7771	chr6LG2	189374750	2		-	-	-	-	-	-	-	-	-	-	-	-	-	-	-	-	-	-	-	-	-	-	-	-	-	-	-	-	-	-	-	-	-	-	-	-	-	-	-	-	-	-	-	-
PsCam024851	58.7771	chr6LG2	189375760	2		-	-	-	-	-	-	-	-	-	-	-	-	-	-	-	-	-	-	-	-	-	-	-	-	-	-	-	-	-	-	-	-	-	-	-	-	-	-	-	-	-	-	-	-
PsCam025421	58.7771	chr6LG2	189033242	2		-	-	-	-	-	-	-	-	-	-	-	-	-	-	-	-	-	-	-	-	-	-	-	-	-	-	-	-	-	-	-	-	-	-	-	-	-	-	-	-	-	-	-	-
PsCam043624	58.8992	chr6LG2	186213645	2		-	-	-	-	-	-	-	-	-	-	-	-	-	-	-	-	-	-	-	-	-	-	-	-	-	-	-	-	-	-	-	-	-	-	-	-	-	-	-	-	-	-	-	-
PsCam058318	59.1367	chr6LG2	190443181	2		-	-	-	-	-	-	-	-	-	-	-	-	-	-	-	-	-	-	-	-	-	-	-	-	-	-	-	-	-	-	-	-	-	-	-	-	-	-	-	-	-	-	-	-
PsCam057696	59.1367	chr6LG2	190598623	2		E	K	K	K	K	E	K	E	E	E	E	-	E	K	E	E	E	E	E	K	K	E	E	E	E	K	E	E	K	K	K	E	K	K	K	K	K	K	E	E	K	K	K	E
PsCam038998	59.3794	chr6LG2	191487602	2		E	K	K	K	K	E	K	E	E	E	E	E	E	K	E	E	E	E	E	K	K	E	E	E	E	K	E	E	K	K	K	E	K	K	K	K	K	K	E	E	K	K	K	E
PsCam037145	59.3794	chr6LG2	191708187	2		E	K	K	K	K	E	K	E	E	E	E	-	E	K	E	E	E	E	E	K	K	E	E	E	E	K	E	E	K	K	K	E	K	K	K	K	K	K	E	E	K	K	K	E
PsCam018513	59.3794	chr6LG2	198120590	2		E	K	K	K	K	E	K	E	E	E	E	-	E	K	E	E	E	E	E	K	K	E	E	E	E	K	E	E	K	K	K	E	K	K	K	K	K	K	E	E	K	K	K	E
PsCam054881	59.617	chr6LG2	197948765	2		-	-	-	-	-	-	-	-	-	-	-	-	-	-	-	-	-	-	-	-	-	-	-	-	-	-	-	-	-	-	-	-	-	-	-	-	-	-	-	-	-	-	-	-
PsCam034017	59.617	chr6LG2	197369030	2		E	K	K	K	K	E	K	E	E	E	E	-	E	K	E	E	E	E	E	K	K	E	E	E	E	K	E	E	K	K	K	E	K	K	K	K	K	K	E	E	K	K	K	E
PsCam042570	59.617	chr6LG2	196881983	2		E	K	K	K	K	E	K	E	E	K	E	E	E	K	E	E	E	E	E	K	K	E	E	E	E	K	E	E	K	K	K	E	K	K	K	K	K	K	E	E	K	K	K	E
PsCam004706	59.617	chr6LG2	201322158	2		-	-	-	-	-	-	-	-	-	-	-	-	-	-	-	-	-	-	-	-	-	-	-	-	-	-	-	-	-	-	-	-	-	-	-	-	-	-	-	-	-	-	-	-
PsCam039506	59.617	chr6LG2	193589815	2		E	K	K	K	K	E	K	E	E	K	E	E	E	K	E	E	E	E	E	K	K	E	E	E	E	K	E	E	K	K	K	E	K	K	K	K	K	K	E	E	K	K	K	E
PsCam009755	59.617	chr6LG2	276774871	2		E	K	K	K	K	E	K	E	E	K	E	E	E	K	E	E	E	E	E	K	K	E	E	E	E	K	E	E	K	K	K	E	K	K	K	K	K	K	E	E	K	K	K	E
PsCam054401	59.617	chr6LG2	276777400	2		E	K	K	K	K	E	K	E	E	K	E	-	E	K	E	E	E	E	E	K	K	E	E	E	E	K	E	E	K	K	K	E	K	K	K	K	K	K	E	E	K	K	K	E
PsCam044401	59.617	chr6LG2	275772348	2		E	K	K	K	K	E	K	E	E	K	E	E	E	K	E	E	E	E	E	K	K	E	E	E	E	K	E	E	K	K	K	E	K	K	K	K	K	K	E	E	K	K	K	E
PsCam027026	60.117	chr6LG2	201421284	2		E	K	K	K	K	E	K	E	E	K	E	-	E	K	E	E	E	E	K	K	K	E	E	E	E	K	E	E	K	K	K	E	K	K	K	K	K	K	E	E	K	K	K	E
PsCam052051	60.117	chr6LG2	201433178	2		E	K	K	K	K	E	K	E	E	K	E	E	E	K	E	E	E	E	K	K	K	E	E	E	E	K	E	E	K	K	K	E	K	K	K	K	K	K	E	E	K	K	K	E
PsCam032778	60.117	chr6LG2	202149419	2		-	-	-	-	-	-	-	-	-	-	-	-	-	-	-	-	-	-	-	-	-	-	-	-	-	-	-	-	-	-	-	-	-	-	-	-	-	-	-	-	-	-	-	-
PsCam045782	60.3556	chr6LG2	205441981	2		E	K	K	K	K	E	K	E	E	K	E	E	E	K	E	E	E	E	K	K	K	E	E	E	E	K	E	E	K	K	K	E	K	K	K	K	K	K	E	E	K	K	K	E
PsCam049865	60.3556	chr6LG2	205936256	2		E	K	K	K	K	E	K	E	E	K	E	-	E	K	E	E	E	E	K	K	K	E	E	E	E	K	E	E	K	K	K	E	K	K	K	K	K	K	E	E	K	K	K	E
PsCam001623	60.3556	chr6LG2	206890250	2		E	K	K	K	K	E	K	E	E	K	E	-	E	K	E	E	E	E	K	K	K	E	E	E	E	K	E	E	K	K	K	E	K	K	K	K	K	K	E	E	K	K	K	E
PsCam049530	60.3556	chr6LG2	206462633	2		-	-	-	-	-	-	-	-	-	-	-	-	-	-	-	-	-	-	-	-	-	-	-	-	-	-	-	-	-	-	-	-	-	-	-	-	-	-	-	-	-	-	-	-
PsCam057547	60.3556	chr6LG2	206307746	2		E	K	K	K	K	E	K	E	E	K	E	-	E	K	E	E	E	E	K	K	K	E	E	E	E	K	E	E	K	K	K	E	K	K	K	K	K	K	E	E	K	K	K	E
PsCam035834	60.3556	chr6LG2	206252874	2		E	K	K	K	K	E	K	E	E	K	E	-	E	K	E	E	E	E	K	K	K	E	E	E	E	K	E	E	K	K	K	E	K	K	K	K	K	K	E	E	K	K	K	E
PsCam024749	60.4805	chr6LG2	207126691	2		E	K	K	K	K	E	K	E	E	K	E	E	E	K	E	E	E	E	K	K	K	E	E	E	E	K	E	E	K	K	K	E	K	K	K	K	K	K	E	E	K	K	K	E
PsCam044912	60.4805	chr6LG2	208349433	2		E	K	K	K	K	E	K	E	E	K	E	E	E	K	E	E	E	E	K	K	K	E	E	E	E	K	E	E	K	K	K	E	K	K	K	K	K	K	E	E	K	K	K	E
PsCam010700	60.4805	chr6LG2	208656059	2		-	-	-	-	-	-	-	-	-	-	-	-	-	-	-	-	-	-	-	-	-	-	-	-	-	-	-	-	-	-	-	-	-	-	-	-	-	-	-	-	-	-	-	-
PsCam035368	60.7336	chr6LG2	226066719	2		E	K	K	K	K	E	K	E	E	K	E	-	E	K	E	E	E	E	K	K	K	E	E	E	E	K	E	E	K	K	K	E	K	K	K	K	K	K	E	E	K	K	K	E
PsCam055323	60.7336	chr6LG2	226061575	2		-	-	-	-	-	-	-	-	-	-	-	-	-	-	-	-	-	-	-	-	-	-	-	-	-	-	-	-	-	-	-	-	-	-	-	-	-	-	-	-	-	-	-	-
PsCam050200	60.7336	chr6LG2	231959623	2		E	K	K	K	K	E	K	E	E	K	E	E	E	K	E	E	E	E	K	K	K	E	E	E	E	K	E	E	K	K	K	E	K	K	K	K	K	K	E	E	K	K	K	E
PsCam031483	60.7336	chr6LG2	232374842	2		E	K	K	K	K	E	K	E	E	K	E	-	E	K	E	E	E	E	K	K	K	E	E	E	E	K	E	E	K	K	K	E	K	K	K	K	K	K	E	E	K	K	K	E
PsCam023575	60.7336	chr6LG2	232401578	2		E	K	K	K	K	E	K	E	E	K	E	-	E	K	E	E	E	E	K	K	K	E	E	E	E	K	E	E	K	K	K	E	K	K	K	K	K	K	E	E	K	K	K	E
PsCam006649	61.3674	chr6LG2	233481397	2		E	K	K	K	K	E	K	E	E	K	E	-	E	K	E	K	E	E	K	K	K	E	E	E	E	K	E	E	K	K	K	E	K	K	K	K	K	E	E	E	K	K	K	E
PsCam042723	61.6155	chr6LG2	233409341	2		E	K	K	K	K	E	K	E	E	K	E	-	E	K	E	K	E	E	K	K	K	E	E	E	E	K	E	E	K	K	K	E	K	K	K	K	K	E	E	E	K	K	K	E
PsCam031367	61.6155	chr6LG2	233408431	2		E	K	K	K	K	E	K	E	E	K	E	-	E	K	E	K	E	E	K	K	K	E	E	E	E	K	E	E	K	K	K	E	K	K	K	K	K	E	E	E	K	K	K	E
PsCam050413	61.6155	chr6LG2	234543056	2		E	K	K	K	K	E	K	E	E	K	E	-	E	K	E	K	E	E	K	K	K	E	E	E	E	K	E	E	K	K	K	E	K	K	K	K	K	E	E	E	K	K	K	E
PsCam051194	61.6155	chr6LG2	234547434	2		E	K	K	K	K	E	K	E	E	K	E	E	E	K	E	K	E	E	K	K	K	E	E	E	E	K	E	E	K	K	K	E	K	K	K	K	K	E	E	E	K	K	K	E
PsCam002125	61.6155	chr6LG2	244722008	2		E	K	K	K	K	E	K	E	E	K	E	E	E	K	E	K	E	E	K	K	K	E	E	E	E	K	E	E	K	K	K	E	K	K	K	K	K	E	E	E	K	K	K	E
PsCam048606	62.3712	chr6LG2	257329330	2		E	K	K	K	E	E	K	E	E	K	E	-	E	K	E	K	E	E	K	K	K	E	E	E	E	K	E	E	K	K	K	E	K	K	K	K	K	E	E	E	K	K	K	E
PsCam049651	62.6193	chr6LG2	256991297	2		E	K	K	K	E	E	K	E	E	K	E	E	E	K	E	K	E	E	K	K	K	E	E	E	E	K	E	E	K	K	K	E	K	K	K	K	K	E	E	E	K	K	K	E
PsCam057997	62.8675	chr6LG2	251124813	2		E	K	K	K	E	E	K	E	E	K	E	E	E	K	E	K	E	E	K	K	K	E	E	E	E	K	E	E	K	K	K	E	K	K	E	K	K	E	E	E	K	K	K	E
PsCam008302	62.9884	chr6LG2	260754474	2		E	K	K	K	E	E	K	E	E	K	E	-	E	K	E	K	E	E	K	K	K	E	E	E	E	K	E	E	K	K	K	E	K	K	E	K	K	E	E	E	K	K	K	E
PsCam006675	62.9884	chr6LG2	256272583	2		E	K	K	K	E	E	K	E	E	K	E	-	E	K	E	K	E	E	K	K	K	E	E	E	E	K	E	E	K	K	K	E	K	K	E	K	K	E	E	E	K	K	K	E
PsCam057901	62.9884	chr6LG2	256190700	2		E	K	K	K	E	E	K	E	E	K	E	E	E	K	E	K	E	E	K	K	K	E	E	E	E	K	E	E	K	K	K	E	K	K	E	K	K	E	E	E	K	K	K	E
PsCam040304	62.9884	chr6LG2	249444142	2		-	-	-	-	-	-	-	-	-	-	-	-	-	-	-	-	-	-	-	-	-	-	-	-	-	-	-	-	-	-	-	-	-	-	-	-	-	-	-	-	-	-	-	-
PsCam011350	62.9884	chr6LG2	249445132	2		-	-	-	-	-	-	-	-	-	-	-	-	-	-	-	-	-	-	-	-	-	-	-	-	-	-	-	-	-	-	-	-	-	-	-	-	-	-	-	-	-	-	-	-
PsCam037416	62.9884	chr6LG2	252716737	2		E	K	K	K	E	E	K	E	E	K	E	-	E	K	E	K	E	E	K	K	K	E	E	E	E	K	E	E	K	K	K	E	K	K	E	K	K	E	E	E	K	K	K	E
PsCam045950	62.9884	chr6LG2	252500833	2		E	K	K	K	E	E	K	E	E	K	E	-	E	K	E	K	E	E	K	K	K	E	E	E	E	K	E	E	K	K	K	E	K	K	E	K	K	E	E	E	K	K	K	E
PsCam038369	62.9884	chr6LG2	252412257	2		-	-	-	-	-	-	-	-	-	-	-	-	-	-	-	-	-	-	-	-	-	-	-	-	-	-	-	-	-	-	-	-	-	-	-	-	-	-	-	-	-	-	-	-
PsCam035392	62.9884	chr6LG2	252405466	2		-	-	-	-	-	-	-	-	-	-	-	-	-	-	-	-	-	-	-	-	-	-	-	-	-	-	-	-	-	-	-	-	-	-	-	-	-	-	-	-	-	-	-	-
PsCam048540	62.9884	chr6LG2	252373550	2		E	K	K	K	E	E	K	E	E	K	E	E	E	K	E	K	E	E	K	K	K	E	E	E	E	K	E	E	K	K	K	E	K	K	E	K	K	E	E	E	K	K	K	E
PsCam036160	62.9884	chr6LG2	252335181	2		E	K	K	K	E	E	K	E	E	K	E	E	E	K	E	K	E	E	K	K	K	E	E	E	E	K	E	E	K	K	K	E	K	K	E	K	K	E	E	E	K	K	K	E
PsCam057601	62.9884	chr6LG2	274253796	2		E	K	K	K	E	E	K	E	E	K	E	E	E	K	E	K	E	E	K	K	K	E	E	E	E	K	E	E	K	K	K	E	K	K	E	K	K	E	E	E	K	K	K	E
PsCam037034	62.9884	chr6LG2	274241888	2		E	K	K	K	E	E	K	E	E	K	E	-	E	K	E	K	E	E	K	K	K	E	E	E	E	K	E	E	K	K	K	E	K	K	E	K	K	E	E	E	K	K	K	E
PsCam029347	62.9884	chr6LG2	261512181	2		E	K	K	K	E	E	K	E	E	K	E	-	E	K	E	K	E	E	K	K	K	E	E	E	E	K	E	E	K	K	K	E	K	K	E	K	K	E	E	E	K	K	K	E
PsCam051291	62.9884	chr6LG2	277490439	2		E	K	K	K	E	E	K	E	E	K	E	E	E	K	E	K	E	E	K	K	K	E	E	E	E	K	E	E	K	K	K	E	K	K	E	K	K	E	E	E	K	K	K	E
PsCam035560	62.9884	chr6LG2	278771348	2		E	K	K	K	E	E	K	E	E	K	E	E	E	K	E	K	E	E	K	K	K	E	E	E	E	K	E	E	K	K	K	E	K	K	E	K	K	E	E	E	K	K	K	E
PsCam036427	63.3538	chr6LG2	278561338	2		E	K	K	K	E	E	K	E	E	K	E	-	E	K	E	K	E	E	K	K	K	E	E	E	E	K	E	E	E	E	K	E	K	K	E	K	K	E	E	E	K	K	K	E
PsCam035674	63.3538	chr6LG2	278613543	2		E	K	K	K	E	E	K	E	E	K	E	-	E	K	E	K	E	E	K	K	K	E	E	E	E	K	E	E	E	E	K	E	K	K	E	K	K	E	E	E	K	K	K	E
PsCam040065	63.5971	chr6LG2	278659904	2		E	K	K	K	E	E	K	E	E	K	E	E	E	K	E	K	E	E	K	K	K	E	E	E	E	K	E	E	E	E	K	E	K	K	E	K	K	E	E	E	K	K	K	E
PsCam007296	63.5971	chr6LG2	278171321	2		E	K	K	K	E	E	K	E	E	K	E	-	E	K	E	K	E	E	K	K	K	E	E	E	E	K	E	E	E	E	K	E	K	K	E	K	K	E	E	E	K	K	K	E
PsCam036057	63.5971	chr6LG2	280651148	2		E	K	K	K	E	E	K	E	E	K	E	-	E	K	E	K	E	E	K	K	K	E	E	E	E	K	E	E	E	E	K	E	K	K	E	K	K	E	E	E	K	K	K	E
PsCam049683	63.5971	chr6LG2	280658561	2		E	K	K	K	E	E	K	E	E	K	E	-	E	K	E	K	E	E	K	K	K	E	E	E	E	K	E	E	E	E	K	E	K	K	E	K	K	E	E	E	K	K	K	E
PsCam046616	63.8346	chr6LG2	281190669	2		E	K	K	K	E	E	K	E	E	K	E	E	E	E	E	K	E	E	K	K	K	E	E	E	E	K	E	E	E	E	K	E	K	K	E	K	K	E	E	E	K	K	K	E
PsCam012842	63.8346	chr6LG2	281289659	2		-	-	-	-	-	-	-	-	-	-	-	-	-	-	-	-	-	-	-	-	-	-	-	-	-	-	-	-	-	-	-	-	-	-	-	-	-	-	-	-	-	-	-	-
PsCam050048	64.0722	chr6LG2	281406672	2		E	K	K	K	E	E	K	E	E	K	E	E	E	E	E	K	E	E	K	K	K	E	E	E	E	K	E	E	E	E	K	E	K	K	E	K	K	E	E	E	K	K	K	E
PsCam043407	64.3097	chr6LG2	283037746	2		-	-	-	-	-	-	-	-	-	-	-	-	-	-	-	-	-	-	-	-	-	-	-	-	-	-	-	-	-	-	-	-	-	-	-	-	-	-	-	-	-	-	-	-
PsCam029447	64.3097	chr6LG2	283034058	2		-	-	-	-	-	-	-	-	-	-	-	-	-	-	-	-	-	-	-	-	-	-	-	-	-	-	-	-	-	-	-	-	-	-	-	-	-	-	-	-	-	-	-	-
PsCam017043	64.5472	chr6LG2	283289021	2		E	K	K	K	E	E	K	E	E	K	E	E	E	E	E	K	E	E	K	K	K	E	E	E	E	K	E	E	E	E	K	E	K	K	E	K	K	E	E	E	E	K	K	E
PsCam029614	64.5472	chr6LG2	283347920	2		-	-	-	-	-	-	-	-	-	-	-	-	-	-	-	-	-	-	-	-	-	-	-	-	-	-	-	-	-	-	-	-	-	-	-	-	-	-	-	-	-	-	-	-
PsCam043404	64.5472	chr6LG2	283431585	2		E	K	K	K	E	E	K	E	E	K	E	E	E	E	E	K	E	E	K	K	K	E	E	E	E	K	E	E	E	E	K	E	K	K	E	K	K	E	E	E	E	K	K	E
PsCam043210	64.5472	chr6LG2	277267118	2		E	K	K	K	E	E	K	E	E	K	E	E	E	E	E	K	E	E	K	K	K	E	E	E	E	K	E	E	E	E	K	E	K	K	E	K	K	E	E	E	E	K	K	E
PsCam034553	64.5472	chr6LG2	282868395	2		E	K	K	K	E	E	K	E	E	K	E	E	E	E	E	K	E	E	K	K	K	E	E	E	E	K	E	E	E	E	K	E	K	K	E	K	K	E	E	E	E	K	K	E
PsCam029248	64.5472	chr6LG2	282879439	2		E	K	K	K	E	E	K	E	E	K	E	E	E	E	E	K	E	E	K	K	K	E	E	E	E	K	E	E	E	E	K	E	K	K	E	K	K	E	E	E	E	K	K	E
PsCam037982	64.5472	chr6LG2	281870510	2		E	K	K	K	E	E	K	E	E	K	E	E	E	E	E	K	E	E	K	K	K	E	E	E	E	K	E	E	E	E	K	E	K	K	E	K	K	E	E	E	E	K	K	E
PsCam000500	64.5472	chr6LG2	282730942	2		E	K	K	K	E	E	K	E	E	K	E	E	E	E	E	K	E	E	K	K	K	E	E	E	E	K	E	E	E	E	K	E	K	K	E	K	K	E	E	E	E	K	K	E
PsCam049102	64.7941	chr6LG2	284154926	2		E	K	K	K	E	E	K	E	E	K	E	E	E	E	E	K	E	E	K	K	K	E	E	E	E	K	E	E	E	E	K	E	K	K	E	K	K	E	E	E	E	K	K	E
PsCam039358	64.7941	chr6LG2	284338685	2		E	K	K	K	E	E	K	E	E	K	E	E	E	E	E	K	E	E	K	K	K	E	E	E	E	K	E	E	E	E	K	E	K	K	E	K	K	E	E	E	E	K	K	E
PsCam045303	65.0317	chr6LG2	284702536	2		-	-	-	-	-	-	-	-	-	-	-	-	-	-	-	-	-	-	-	-	-	-	-	-	-	-	-	-	-	-	-	-	-	-	-	-	-	-	-	-	-	-	-	-
PsCam042188	65.0317	chr6LG2	284907761	2		-	-	-	-	-	-	-	-	-	-	-	-	-	-	-	-	-	-	-	-	-	-	-	-	-	-	-	-	-	-	-	-	-	-	-	-	-	-	-	-	-	-	-	-
PsCam009740	65.0317	chr6LG2	284944055	2		-	-	-	-	-	-	-	-	-	-	-	-	-	-	-	-	-	-	-	-	-	-	-	-	-	-	-	-	-	-	-	-	-	-	-	-	-	-	-	-	-	-	-	-
PsCam003182	65.0317	chr6LG2	284453466	2		-	-	-	-	-	-	-	-	-	-	-	-	-	-	-	-	-	-	-	-	-	-	-	-	-	-	-	-	-	-	-	-	-	-	-	-	-	-	-	-	-	-	-	-
PsCam027745	65.0317	chr6LG2	284453960	2		-	-	-	-	-	-	-	-	-	-	-	-	-	-	-	-	-	-	-	-	-	-	-	-	-	-	-	-	-	-	-	-	-	-	-	-	-	-	-	-	-	-	-	-
PsCam018087	65.0317	chr6LG2	284564041	2		-	-	-	-	-	-	-	-	-	-	-	-	-	-	-	-	-	-	-	-	-	-	-	-	-	-	-	-	-	-	-	-	-	-	-	-	-	-	-	-	-	-	-	-
PsCam004815	65.0317	chr6LG2	284573824	2		-	-	-	-	-	-	-	-	-	-	-	-	-	-	-	-	-	-	-	-	-	-	-	-	-	-	-	-	-	-	-	-	-	-	-	-	-	-	-	-	-	-	-	-
PsCam049044	65.0317	chr6LG2	285862673	2		E	K	K	K	E	E	K	E	E	K	E	E	E	E	E	K	E	E	K	K	K	E	E	E	E	K	E	E	E	E	K	E	K	K	E	K	K	E	E	E	E	K	K	E
PsCam011031	65.0317	chr6LG2	285150953	2		E	K	K	K	E	E	K	E	E	K	E	E	E	E	E	K	E	E	K	K	K	E	E	E	E	K	E	E	E	E	K	E	K	K	E	K	K	E	E	E	E	K	K	E
PsCam035810	65.0317	chr6LG2	285264648	2		-	-	-	-	-	-	-	-	-	-	-	-	-	-	-	-	-	-	-	-	-	-	-	-	-	-	-	-	-	-	-	-	-	-	-	-	-	-	-	-	-	-	-	-
PsCam039276	65.2692	chr6LG2	285452721	2		E	K	K	K	E	E	K	E	E	K	E	E	E	E	E	K	E	E	K	K	K	E	E	E	E	K	E	E	E	E	K	E	K	K	E	K	K	E	E	E	E	K	K	E
PsCam012000	65.5067	chr6LG2	285479106	2		E	K	K	K	E	E	K	E	E	K	E	E	E	E	E	K	E	E	K	K	K	E	E	E	E	K	E	E	E	E	K	E	K	K	E	K	K	E	E	E	E	K	K	E
PsCam013256	65.5067	chr6LG2	287623707	2		-	-	-	-	-	-	-	-	-	-	-	-	-	-	-	-	-	-	-	-	-	-	-	-	-	-	-	-	-	-	-	-	-	-	-	-	-	-	-	-	-	-	-	-
PsCam043129	65.9852	chr6LG2	284993850	2		E	K	K	K	E	E	K	E	E	K	E	E	E	E	E	K	E	E	K	K	K	E	E	E	E	K	E	E	E	E	K	E	K	K	E	K	K	E	E	E	E	K	K	E
PsCam050070	65.9852	chr6LG2	287468278	2		E	K	K	K	E	E	K	E	E	K	E	E	E	E	E	K	E	E	K	K	K	E	E	E	E	K	E	E	E	E	K	E	K	K	E	K	K	E	E	E	E	K	K	E
PsCam023415	65.9852	chr6LG2	288108582	2		E	K	K	K	E	E	K	E	E	K	E	E	E	E	E	K	E	E	K	K	K	E	E	E	E	K	E	E	E	E	K	E	K	K	E	K	K	E	E	E	E	K	K	E
PsCam007413	65.9852	chr6LG2	288138209	2		E	K	K	K	E	E	K	E	E	K	E	E	E	E	E	K	E	E	K	K	K	E	E	E	E	K	E	E	E	E	K	E	K	K	E	K	K	E	E	E	E	K	K	E
PsCam057894	65.9852	chr6LG2	289875649	2		-	-	-	-	-	-	-	-	-	-	-	-	-	-	-	-	-	-	-	-	-	-	-	-	-	-	-	-	-	-	-	-	-	-	-	-	-	-	-	-	-	-	-	-
PsCam014183	65.9852	chr6LG2	288618179	2		E	K	K	K	E	E	K	E	E	K	E	E	E	E	E	K	E	E	K	K	K	E	E	E	E	K	E	E	E	E	K	E	K	K	E	K	K	E	E	E	E	K	K	E
PsCam036611	66.2352	chr6LG2	290636490	2		E	K	K	K	E	E	K	E	E	K	E	E	E	E	E	K	E	E	K	K	K	E	E	E	E	K	E	E	E	E	K	E	K	K	E	K	K	E	E	E	E	K	K	E
PsCam050914	66.4821	chr6LG2	290738163	2		E	K	K	K	E	E	K	E	E	K	E	E	E	E	E	K	E	E	K	K	K	E	E	E	E	K	E	E	E	E	K	E	K	K	E	K	K	E	E	E	E	K	K	E
PsCam045334	66.729	chr6LG2	291022994	2		E	K	K	K	E	E	K	E	E	K	E	E	E	E	E	K	E	E	K	K	K	E	E	E	E	K	E	E	E	E	K	E	K	K	E	K	K	E	E	E	E	K	K	E
PsCam036861	66.729	chr6LG2	291091226	2		E	K	K	K	E	E	K	E	E	K	E	E	E	E	E	K	E	E	K	K	K	E	E	E	E	K	E	E	E	E	K	E	K	K	E	K	K	E	E	E	E	K	K	E
PsCam001783	67.0936	chr6LG2	291619705	2		E	K	K	K	E	E	K	E	E	K	E	E	E	E	E	K	E	E	K	K	K	E	E	E	E	K	E	E	E	E	K	E	K	K	E	K	K	E	E	E	E	K	K	E
PsCam048466	67.0936	chr6LG2	291620163	2		E	K	K	K	E	E	K	E	E	K	E	E	E	E	E	K	E	E	K	K	K	E	E	E	E	K	E	E	E	E	K	E	K	K	E	K	K	E	E	E	E	K	K	E
PsCam038222	67.0936	chr6LG2	291633218	2		E	K	K	K	E	E	K	E	E	K	E	E	E	E	E	K	E	E	K	K	K	E	E	E	E	K	E	E	E	E	K	E	K	K	E	K	K	E	E	E	E	K	K	E
PsCam051252	67.0936	chr6LG2	291635445	2		E	K	K	K	E	E	K	E	E	K	E	E	E	E	E	K	E	E	K	K	K	E	E	E	E	K	E	E	E	E	K	E	K	K	E	K	K	E	E	E	E	K	K	E
PsCam058059	67.0936	chr6LG2	291670912	2		E	K	K	K	E	E	K	E	E	K	E	E	E	E	E	K	E	E	K	K	K	E	E	E	E	K	E	E	E	E	K	E	K	K	E	K	K	E	E	E	E	K	K	E
PsCam051439	70.8386	chr6LG2	297280243	2		E	K	K	K	E	E	K	E	E	K	E	E	E	E	K	K	E	E	K	K	K	E	E	E	E	K	E	E	E	E	K	E	K	K	E	K	K	E	E	E	E	K	K	E
PsCam058201	70.8386	chr6LG2	300158523	2		E	K	K	K	E	E	K	E	E	K	E	E	E	E	K	K	E	E	K	K	K	E	E	E	E	K	E	E	E	E	K	E	K	K	E	K	K	E	E	E	E	K	K	E
PsCam037269	70.8386	chr6LG2	297637845	2		E	K	K	K	E	E	K	E	E	K	E	E	E	E	K	K	E	E	K	K	K	E	E	E	E	K	E	E	E	E	K	E	K	K	E	K	K	E	E	E	E	K	K	E
PsCam004752	70.8386	chr6LG2	297683740	2		E	K	K	K	E	E	K	E	E	K	E	E	E	E	K	K	E	E	K	K	K	E	E	E	E	K	E	E	E	E	K	E	K	K	E	K	K	E	E	E	E	K	K	E
PsCam027207	70.9592	chr6LG2	298474018	2		E	K	K	K	E	E	K	E	E	K	E	E	E	E	K	K	E	E	K	K	K	E	E	E	E	K	E	E	E	E	K	E	K	K	E	K	K	E	E	E	E	K	K	E
PsCam011504	70.9592	chr6LG2	300850925	2		E	K	K	K	E	E	K	E	E	K	E	E	E	E	K	K	E	E	K	K	K	E	E	E	E	K	E	E	E	E	K	E	K	K	E	K	K	E	E	E	E	K	K	E
PsCam054123	70.9592	chr6LG2	300853504	2		E	K	K	K	E	E	K	E	E	K	E	E	E	E	K	K	E	E	K	K	K	E	E	E	E	K	E	E	E	E	K	E	K	K	E	K	K	E	E	E	E	K	K	E
PsCam044092	71.0799	chr6LG2	301102492	2		E	K	K	K	E	E	K	E	E	K	E	E	E	E	K	K	E	E	K	K	K	E	E	E	E	K	E	E	E	E	K	E	K	K	E	K	K	E	E	E	E	K	K	E
PsCam053665	71.817	chr6LG2	306339162	2		E	K	K	K	E	E	K	E	E	K	E	E	E	E	K	K	E	E	K	K	K	E	E	E	K	K	E	E	E	E	K	E	K	K	E	K	K	E	E	E	E	K	K	E
PsCam055470	71.817	chr6LG2	306397232	2		E	K	K	K	E	E	K	E	E	K	E	E	E	E	K	K	E	E	K	K	K	E	E	E	K	K	E	E	E	E	K	E	K	K	E	K	K	E	E	E	E	K	K	E
PsCam011842	71.817	chr6LG2	306429739	2		E	K	K	K	E	E	K	E	E	K	E	E	E	E	K	K	E	E	K	K	K	E	E	E	K	K	E	E	E	E	K	E	K	K	E	K	K	E	E	E	E	K	K	E
PsCam057785	71.817	chr6LG2	306762267	2		E	K	K	K	E	E	K	E	E	K	E	E	E	E	K	K	E	E	K	K	K	E	E	E	K	K	E	E	E	E	K	E	K	K	E	K	K	E	E	E	E	K	K	E
PsCam044976	71.817	scaffold01051	25966	2		E	K	K	K	E	E	K	E	E	K	E	E	E	E	K	K	E	E	K	K	K	E	E	E	K	K	E	E	E	E	K	E	K	K	E	K	K	E	E	E	E	K	K	E
PsCam060125	71.817	chr6LG2	307307502	2		E	K	K	K	E	E	K	E	E	K	E	E	E	E	K	K	E	E	K	K	K	E	E	E	K	K	E	E	E	E	K	E	K	K	E	K	K	E	E	E	E	K	K	E
PsCam036788	71.9376	chr6LG2	307414023	2		E	K	K	K	E	E	K	E	E	K	E	E	E	E	K	K	E	E	K	K	K	E	E	E	K	K	E	E	E	E	K	E	K	K	E	K	K	E	E	E	E	K	K	E
PsCam043114	71.9376	chr6LG2	307422246	2		E	K	K	K	E	E	K	E	E	K	E	E	E	E	K	K	E	E	K	K	K	E	E	E	K	K	E	E	E	E	K	E	K	K	E	K	K	E	E	E	E	K	K	E
PsCam037387	72.0582	chr6LG2	307481596	2		E	K	K	K	E	E	K	E	E	K	E	E	E	E	K	K	E	E	K	K	K	E	E	E	K	K	E	E	E	E	K	E	K	K	E	K	K	E	E	E	E	K	K	E
PsCam036058	72.1789	chr6LG2	315342398	2		E	K	K	K	E	E	K	E	E	K	E	E	E	E	K	K	E	E	K	K	K	E	E	E	K	K	E	E	E	E	K	E	K	K	E	K	K	E	E	E	E	K	K	E
PsCam042827	72.1789	chr6LG2	315428116	2		E	K	K	K	E	E	K	E	E	K	E	E	E	E	K	K	E	E	K	K	K	E	E	E	K	K	E	E	E	E	K	E	K	K	E	K	K	E	E	E	E	K	K	E
PsCam045737	72.1789	chr6LG2	315682504	2		E	K	K	K	E	E	K	E	E	K	E	E	E	E	K	K	E	E	K	K	K	E	E	E	K	K	E	E	E	E	K	E	K	K	E	K	K	E	E	E	E	K	K	E
PsCam045730	72.1789	chr6LG2	315704868	2		E	K	K	K	E	E	K	E	E	K	E	E	E	E	K	K	E	E	K	K	K	E	E	E	K	K	E	E	E	E	K	E	K	K	E	K	K	E	E	E	E	K	K	E
PsCam030997	72.1789	chr6LG2	315709858	2		E	K	K	K	E	E	K	E	E	K	E	E	E	E	K	K	E	E	K	K	K	E	E	E	K	K	E	E	E	E	K	E	K	K	E	K	K	E	E	E	E	K	K	E
PsCam045898	72.1789	chr6LG2	315782652	2		E	K	K	K	E	E	K	E	E	K	E	E	E	E	K	K	E	E	K	K	K	E	E	E	K	K	E	E	E	E	K	E	K	K	E	K	K	E	E	E	E	K	K	E
PsCam042179	72.1789	chr6LG2	316541684	2		E	K	K	K	E	E	K	E	E	K	E	E	E	E	K	K	E	E	K	K	K	E	E	E	K	K	E	E	E	E	K	E	K	K	E	K	K	E	E	E	E	K	K	E
PsCam043044	72.6764	chr6LG2	316829439	2		E	K	K	K	E	E	K	E	E	K	E	E	E	E	K	K	E	E	K	K	K	E	E	E	K	K	E	E	E	E	K	E	K	K	E	K	K	E	E	E	E	K	K	E
PsCam048790	72.9185	chr6LG2	321218259	2		E	K	K	K	E	E	K	E	E	K	E	E	E	E	K	K	E	E	K	K	K	E	E	E	K	K	E	E	E	E	K	E	K	K	E	K	K	E	E	E	E	K	K	E
PsCam007050	73.0391	chr6LG2	317438975	2		E	K	K	K	E	E	K	E	E	K	E	E	E	E	K	K	E	E	K	K	K	E	E	E	K	K	E	E	E	E	K	E	K	K	E	K	K	E	E	E	E	K	K	E
PsCam054124	73.0391	chr6LG2	317451796	2		E	K	K	K	E	E	K	E	E	K	E	E	E	E	K	K	E	E	K	K	K	E	E	E	K	K	E	E	E	E	K	E	K	K	E	K	K	E	E	E	E	K	K	E
PsCam040185	73.0391	scaffold00802	18545	2		E	K	K	K	E	E	K	E	E	K	E	E	E	E	K	K	E	E	K	K	K	E	E	E	K	K	E	E	E	E	K	E	K	K	E	K	K	E	E	E	E	K	K	E
PsCam052084	73.0391	chr6LG2	318736456	2		E	K	K	K	E	E	K	E	E	K	E	E	E	E	K	K	E	E	K	K	K	E	E	E	K	K	E	E	E	E	K	E	K	K	E	K	K	E	E	E	E	K	K	E
PsCam038333	73.1598	chr6LG2	319143580	2		E	K	K	K	E	E	K	E	E	K	E	E	E	E	K	K	E	E	K	K	K	E	E	E	K	K	E	E	E	E	K	E	K	K	E	K	K	E	E	E	E	K	K	E
PsCam038900	73.3984	chr6LG2	319193882	2		E	K	K	K	E	E	K	E	E	K	E	E	E	E	K	K	E	E	K	K	K	E	E	E	K	K	E	E	E	E	K	E	K	K	E	K	K	E	K	E	E	K	K	E
PsCam042567	73.6371	chr6LG2	321666498	2		-	-	-	-	-	-	-	-	-	-	-	-	-	-	-	-	-	-	-	-	-	-	-	-	-	-	-	-	-	-	-	-	-	-	-	-	-	-	-	-	-	-	-	-
PsCam034857	73.6371	chr6LG2	320821249	2		E	K	K	K	E	E	K	E	E	K	E	E	E	E	K	K	E	E	K	K	K	E	E	E	K	K	E	E	E	E	K	E	K	K	E	K	K	E	K	E	E	E	K	E
PsCam012324	73.6371	chr6LG2	322867669	2		E	K	K	K	E	E	K	E	E	K	E	E	E	E	K	K	E	E	K	K	K	E	E	E	K	K	E	E	E	E	K	E	K	K	E	K	K	E	K	E	E	E	K	E
PsCam049340	73.6371	chr6LG2	323067796	2		E	K	K	K	E	E	K	E	E	K	E	E	E	E	K	K	E	E	K	K	K	E	E	E	K	K	E	E	E	E	K	E	K	K	E	K	K	E	K	E	E	E	K	E
PsCam051527	73.6371	chr6LG2	323111216	2		E	K	K	K	E	E	K	E	E	K	E	E	E	E	K	K	E	E	K	K	K	E	E	E	K	K	E	E	E	E	K	E	K	K	E	K	K	E	K	E	E	E	K	E
PsCam042579	73.6371	chr6LG2	323568381	2		E	K	K	K	E	E	K	E	E	K	E	E	E	E	K	K	E	E	K	K	K	E	E	E	K	K	E	E	E	E	K	E	K	K	E	K	K	E	K	E	E	E	K	E
PsCam048610	73.7577	chr6LG2	323966268	2		E	K	K	K	E	E	K	E	E	K	E	E	E	E	K	K	E	E	K	K	K	E	E	E	K	K	E	E	E	E	K	E	K	K	E	K	K	E	K	E	E	E	K	E
PsCam039481	73.7577	chr6LG2	324132962	2		E	K	K	K	E	E	K	E	E	K	E	E	E	E	K	K	E	E	K	K	K	E	E	E	K	K	E	E	E	E	K	E	K	K	E	K	K	E	K	E	E	E	K	E
PsCam008074	74.3697	chr6LG2	324645549	2		E	K	K	K	E	E	K	E	E	K	E	E	E	E	K	K	E	E	K	K	K	E	E	E	K	K	E	E	E	E	K	E	K	K	E	K	K	E	K	E	E	E	K	E
PsCam000940	74.3697	chr6LG2	325519122	2		E	K	K	K	E	E	K	E	E	K	E	E	E	E	K	K	E	E	K	K	K	E	E	E	K	K	E	E	E	E	K	E	K	K	E	K	K	E	K	E	E	E	K	E
PsCam049246	74.4904	chr6LG2	325645314	2		E	K	K	K	E	E	K	E	E	K	E	E	E	E	K	K	E	E	K	K	K	E	E	E	K	K	E	E	E	E	K	E	K	K	E	K	K	E	K	E	E	E	K	E
PsCam043992	74.9782	chr6LG2	326711706	2		E	K	K	K	E	E	K	E	K	K	E	E	E	E	K	K	E	E	K	K	K	E	E	E	K	K	E	E	E	E	K	E	K	K	E	K	K	E	K	E	E	E	K	K
PsCam060158	75.0988	chr6LG2	326728402	2		E	K	K	K	E	E	K	E	K	K	E	E	E	E	K	K	E	E	K	K	K	E	E	E	K	K	E	E	E	E	K	E	K	K	E	K	K	E	K	E	E	E	K	K
PsCam012901	75.0988	chr6LG2	327349074	2		E	K	K	K	E	E	K	E	K	K	E	E	E	E	K	K	E	E	K	K	K	E	E	E	K	K	E	E	E	E	K	E	K	K	E	K	K	E	K	E	E	E	K	K
PsCam000503	75.0988	chr6LG2	329579437	2		E	K	K	K	E	E	K	E	K	K	E	E	E	E	K	K	E	E	K	K	K	E	E	E	K	K	E	E	E	E	K	E	K	K	E	K	K	E	K	E	E	E	K	K
PsCam050688	75.0988	chr6LG2	329599428	2		E	K	K	K	E	E	K	E	K	K	E	E	E	E	K	K	E	E	K	K	K	E	E	E	K	K	E	E	E	E	K	E	K	K	E	K	K	E	K	E	E	E	K	K
PsCam021990	75.0988	chr6LG2	329604379	2		E	K	K	K	E	E	K	E	K	K	E	E	E	E	K	K	E	E	K	K	K	E	E	E	K	K	E	E	E	E	K	E	K	K	E	K	K	E	K	E	E	E	K	K
PsCam000042	75.0988	chr6LG2	329127197	2		E	K	K	K	E	E	K	E	K	K	E	E	E	E	K	K	E	E	K	K	K	E	E	E	K	K	E	E	E	E	K	E	K	K	E	K	K	E	K	E	E	E	K	K
PsCam008530	75.0988	chr6LG2	329128517	2		E	K	K	K	E	E	K	E	K	K	E	E	E	E	K	K	E	E	K	K	K	E	E	E	K	K	E	E	E	E	K	E	K	K	E	K	K	E	K	E	E	E	K	K
PsCam048964	75.0988	chr6LG2	330533806	2		E	K	K	K	E	E	K	E	K	K	E	E	E	E	K	K	E	E	K	K	K	E	E	E	K	K	E	E	E	E	K	E	K	K	E	K	K	E	K	E	E	E	K	K
PsCam000135	76.3711	chr6LG2	331300459	2		E	K	K	K	E	E	K	E	K	K	E	E	E	E	K	K	E	E	K	K	K	E	E	E	K	K	E	E	E	E	K	E	K	K	E	K	K	E	K	E	E	E	K	K
PsCam013589	76.3711	chr6LG2	305424968	2		E	K	K	K	E	E	K	E	K	K	E	E	E	E	K	K	E	E	K	K	K	E	E	E	K	K	E	E	E	E	K	E	K	K	E	K	K	E	K	E	E	E	K	K
PsCam040579	76.7562	chr6LG2	332029653	2		E	K	K	K	E	E	K	E	K	K	E	E	E	E	K	K	E	E	K	K	K	E	E	E	K	K	E	E	E	E	K	E	K	K	E	K	K	E	K	E	E	E	K	K
PsCam049359	76.884	chr6LG2	332339905	2		E	K	K	K	E	E	K	E	K	K	E	E	E	-	K	K	-	E	K	K	K	E	E	E	K	K	E	E	E	E	K	E	K	K	E	K	K	E	K	E	E	E	K	K
PsCam045445	76.884	chr6LG2	332435498	2		E	K	K	K	E	E	K	E	K	K	E	E	E	E	K	K	E	E	K	K	K	E	E	E	K	K	E	E	E	E	K	E	K	K	E	K	K	E	K	E	E	E	K	K
PsCam021457	77.1333	chr6LG2	333302978	2		E	K	K	K	E	E	K	E	K	K	E	E	E	E	K	K	E	E	K	K	K	E	E	E	K	K	E	E	E	E	K	E	K	K	E	K	K	E	K	E	E	E	K	K
PsCam034754	77.1333	chr6LG2	334427092	2		E	K	K	K	E	E	K	E	K	K	E	E	E	E	K	K	E	E	K	K	K	E	E	E	K	K	E	E	E	E	K	E	K	K	E	K	K	E	K	E	E	E	K	K
PsCam037102	77.1333	chr6LG2	334539037	2		-	-	-	-	-	-	-	-	-	-	-	-	-	-	-	-	-	-	-	-	-	-	-	-	-	-	-	-	-	-	-	-	-	-	-	-	-	-	-	-	-	-	-	-
PsCam049434	77.1333	chr6LG2	334607553	2		E	K	K	K	E	E	K	E	E	K	E	E	E	E	K	K	E	E	K	K	K	E	E	E	K	K	E	E	E	E	K	E	K	K	E	K	K	E	K	E	E	E	K	K
PsCam038895	77.1333	chr6LG2	334645689	2		E	K	K	K	E	E	K	E	E	K	E	E	E	E	K	K	E	E	K	K	K	E	E	E	K	K	E	E	E	E	K	E	K	K	E	K	K	E	K	E	E	E	K	K
PsCam017241	77.1333	chr6LG2	334659419	2		E	K	K	K	E	E	K	E	E	K	E	E	E	E	K	K	E	E	K	K	K	E	E	E	K	K	E	E	E	E	K	E	K	K	E	K	K	E	K	E	E	E	K	K
PsCam045591	77.1333	chr6LG2	334756014	2		E	K	K	K	E	E	K	E	E	K	E	E	E	E	K	K	E	E	K	K	K	E	E	E	K	K	E	E	E	E	K	E	K	K	E	K	K	E	K	E	E	E	K	K
PsCam000262	77.1333	chr6LG2	335871672	2		E	K	K	K	E	E	K	E	E	K	E	E	E	E	K	K	E	E	K	K	K	E	E	E	K	K	E	E	E	E	K	E	K	K	E	K	K	E	K	E	E	E	K	K
PsCam048129	77.3802	chr6LG2	335823948	2		E	K	K	K	E	E	K	E	E	K	E	E	E	E	K	K	E	E	K	K	K	E	E	E	K	K	E	E	E	E	K	E	K	K	E	K	K	E	K	E	E	E	K	K
PsCam033595	77.5054	chr6LG2	338389753	2		E	K	K	K	E	E	K	E	E	K	E	E	E	E	K	K	E	E	K	K	K	E	E	E	K	K	E	E	E	E	K	E	K	K	E	K	K	E	K	E	E	E	K	K
PsCam037511	77.5054	chr6LG2	337943941	2		E	K	K	K	E	E	K	E	E	K	E	E	E	E	K	K	E	E	K	K	K	E	E	E	K	K	E	E	E	E	K	E	K	K	E	K	K	E	K	E	E	E	K	K
PsCam024867	77.5054	chr6LG2	338768309	2		E	K	K	K	E	E	K	E	E	K	E	E	E	E	K	K	E	E	K	K	K	E	E	E	K	K	E	E	E	E	K	E	K	K	E	K	K	E	K	E	E	E	K	K
PsCam037675	77.5054	chr6LG2	338805059	2		E	K	K	K	E	E	K	E	E	K	E	E	E	E	K	K	E	E	K	K	K	E	E	E	K	K	E	E	E	E	K	E	K	K	E	K	K	E	K	E	E	E	K	K
PsCam045681	77.7612	chr6LG2	338923645	2		-	-	-	-	-	-	-	-	-	-	-	-	-	-	-	-	-	-	-	-	-	-	-	-	-	-	-	-	-	-	-	-	-	-	-	-	-	-	-	-	-	-	-	-
PsCam044801	77.7612	chr6LG2	339078621	2		E	K	K	K	E	E	K	E	E	K	E	E	E	E	K	K	E	E	K	K	K	E	E	E	K	K	E	E	E	E	K	E	K	K	E	K	K	E	K	E	E	E	K	K
PsCam052166	77.7612	chr6LG2	339124072	2		-	-	-	-	-	-	-	-	-	-	-	-	-	-	-	-	-	-	-	-	-	-	-	-	-	-	-	-	-	-	-	-	-	-	-	-	-	-	-	-	-	-	-	-
PsCam059376	77.7612	chr6LG2	339246029	2		-	-	-	-	-	-	-	-	-	-	-	-	-	-	-	-	-	-	-	-	-	-	-	-	-	-	-	-	-	-	-	-	-	-	-	-	-	-	-	-	-	-	-	-
PsCam057535	77.7612	chr6LG2	339248753	2		-	-	-	-	-	-	-	-	-	-	-	-	-	-	-	-	-	-	-	-	-	-	-	-	-	-	-	-	-	-	-	-	-	-	-	-	-	-	-	-	-	-	-	-
PsCam039603	77.7612	scaffold03951	19348	2		E	K	K	K	E	E	K	E	E	K	E	E	E	E	K	K	E	E	K	K	K	E	E	E	K	K	E	E	E	E	K	E	K	K	E	K	K	E	K	E	E	E	K	K
PsCam035401	77.7612	chr6LG2	339482375	2		E	K	K	K	E	E	K	E	E	K	E	E	E	E	K	K	E	E	K	K	K	E	E	E	K	K	E	E	E	E	K	E	K	K	E	K	K	E	K	E	E	E	K	K
PsCam008357	77.7612	chr6LG2	339484621	2		-	-	-	-	-	-	-	-	-	-	-	-	-	-	-	-	-	-	-	-	-	-	-	-	-	-	-	-	-	-	-	-	-	-	-	-	-	-	-	-	-	-	-	-
PsCam030122	77.7612	chr6LG2	339663187	2		E	K	K	K	E	E	K	E	E	K	E	E	E	E	K	K	E	E	K	K	K	E	E	E	K	K	E	E	E	E	K	E	K	K	E	K	K	E	K	E	E	E	K	K
PsCam045377	77.7612	chr6LG2	339749599	2		-	-	-	-	-	-	-	-	-	-	-	-	-	-	-	-	-	-	-	-	-	-	-	-	-	-	-	-	-	-	-	-	-	-	-	-	-	-	-	-	-	-	-	-
PsCam011075	77.7612	chr6LG2	340349409	2		-	-	-	-	-	-	-	-	-	-	-	-	-	-	-	-	-	-	-	-	-	-	-	-	-	-	-	-	-	-	-	-	-	-	-	-	-	-	-	-	-	-	-	-
PsCam028300	78.0209	chr6LG2	340774853	2		-	-	-	-	-	-	-	-	-	-	-	-	-	-	-	-	-	-	-	-	-	-	-	-	-	-	-	-	-	-	-	-	-	-	-	-	-	-	-	-	-	-	-	-
PsCam030891	78.0209	scaffold01505	82769	2		E	K	K	K	E	E	K	E	E	K	E	E	E	E	K	K	E	E	K	K	K	E	E	E	K	K	E	E	E	E	K	E	K	K	E	K	K	E	K	E	E	E	K	K
PsCam002572	78.4011	chr6LG2	342111844	2		E	K	K	K	E	E	K	E	E	K	E	E	E	E	K	K	E	E	K	K	K	E	E	E	K	K	E	E	E	E	K	E	K	K	E	K	K	E	K	E	E	E	K	K
PsCam001384	78.4011	chr6LG2	342113054	2		E	K	K	K	E	E	K	E	E	K	E	E	E	E	K	K	E	E	K	K	K	E	E	E	K	K	E	E	E	E	K	E	K	K	E	K	K	E	K	E	E	E	K	K
PsCam035644	78.4011	chr6LG2	342130708	2		E	K	K	K	E	E	K	E	E	K	E	E	E	E	K	K	E	E	K	K	K	E	E	E	K	K	E	E	E	E	K	E	K	K	E	K	K	E	K	E	E	E	K	K
PsCam045885	78.4011	chr6LG2	342138877	2		E	K	K	K	E	E	K	E	E	K	E	E	E	E	K	K	E	E	K	K	K	E	E	E	K	K	E	E	E	E	K	E	K	K	E	K	K	E	K	E	E	E	K	K
PsCam050650	78.4011	chr6LG2	342434224	2		E	K	K	K	E	E	K	E	E	K	E	E	E	E	K	K	E	E	K	K	K	E	E	E	K	K	E	E	E	E	K	E	K	K	E	K	K	E	K	E	E	E	K	K
PsCam046503	78.4011	chr6LG2	342525769	2		-	-	-	-	-	-	-	-	-	-	-	-	-	-	-	-	-	-	-	-	-	-	-	-	-	-	-	-	-	-	-	-	-	-	-	-	-	-	-	-	-	-	-	-
PsCam024732	78.4011	chr6LG2	342557085	2		E	K	K	K	E	E	K	E	E	K	E	E	E	E	K	K	E	E	K	K	K	E	E	E	K	K	E	E	E	E	K	E	K	K	E	K	K	E	K	E	E	E	K	K
PsCam056033	78.4011	chr6LG2	342667551	2		-	-	-	-	-	-	-	-	-	-	-	-	-	-	-	-	-	-	-	-	-	-	-	-	-	-	-	-	-	-	-	-	-	-	-	-	-	-	-	-	-	-	-	-
PsCam035381	78.4011	chr6LG2	342673664	2		-	-	-	-	-	-	-	-	-	-	-	-	-	-	-	-	-	-	-	-	-	-	-	-	-	-	-	-	-	-	-	-	-	-	-	-	-	-	-	-	-	-	-	-
PsCam004715	78.4011	chr6LG2	343261241	2		E	K	K	K	E	E	K	E	E	K	E	E	E	E	K	K	E	E	K	K	K	E	E	E	K	K	E	E	E	E	K	E	K	K	E	K	K	E	K	E	E	E	K	K
PsCam035325	78.4011	scaffold04589	3932	2		E	K	K	K	E	E	K	E	E	K	E	E	E	E	K	K	E	E	K	K	K	E	E	E	K	K	E	E	E	E	K	E	K	K	E	K	K	E	K	E	E	E	K	K
PsCam021238	78.4011	chr6LG2	348885982	2		E	K	K	K	E	E	K	E	E	K	E	E	E	E	K	K	E	E	K	K	K	E	E	E	K	K	E	E	E	E	K	E	K	K	E	K	K	E	K	E	E	E	K	K
PsCam035144	78.4011	chr6LG2	342851036	2		E	K	K	K	E	E	K	E	E	K	E	E	E	E	K	K	E	E	K	K	K	E	E	E	K	K	E	E	E	E	K	E	K	K	E	K	K	E	K	E	E	E	K	K
PsCam042882	78.4011	chr6LG2	343807603	2		E	K	K	K	E	E	K	E	E	K	E	E	E	E	K	K	E	E	K	K	K	E	E	E	K	K	E	E	E	E	K	E	K	K	E	K	K	E	K	E	E	E	K	K
PsCam003947	78.4011	chr6LG2	343864386	2		-	-	-	-	-	-	-	-	-	-	-	-	-	-	-	-	-	-	-	-	-	-	-	-	-	-	-	-	-	-	-	-	-	-	-	-	-	-	-	-	-	-	-	-
PsCam049133	78.4011	chr6LG2	343868987	2		-	-	-	-	-	-	-	-	-	-	-	-	-	-	-	-	-	-	-	-	-	-	-	-	-	-	-	-	-	-	-	-	-	-	-	-	-	-	-	-	-	-	-	-
PsCam038161	78.4011	chr6LG2	343334548	2		E	K	K	K	E	E	K	E	E	K	E	E	E	E	K	K	E	E	K	K	K	E	E	E	K	K	E	E	E	E	K	E	K	K	E	K	K	E	K	E	E	E	K	K
PsCam011776	78.4011	chr6LG2	345271790	2		-	-	-	-	-	-	-	-	-	-	-	-	-	-	-	-	-	-	-	-	-	-	-	-	-	-	-	-	-	-	-	-	-	-	-	-	-	-	-	-	-	-	-	-
PsCam050717	78.4011	chr6LG2	345715303	2		E	K	K	K	E	E	K	E	E	K	E	E	E	E	K	K	E	E	K	K	K	E	E	E	K	K	E	E	E	E	K	E	K	K	E	K	K	E	K	E	E	E	K	K
PsCam026162	78.4011	chr6LG2	345711249	2		E	K	K	K	E	E	K	E	E	K	E	E	E	E	K	K	E	E	K	K	K	E	E	E	K	K	E	E	E	E	K	E	K	K	E	K	K	E	K	E	E	E	K	K
PsCam001595	78.4011	chr6LG2	345673799	2		-	-	-	-	-	-	-	-	-	-	-	-	-	-	-	-	-	-	-	-	-	-	-	-	-	-	-	-	-	-	-	-	-	-	-	-	-	-	-	-	-	-	-	-
PsCam034708	78.4011	chr6LG2	345806457	2		E	K	K	K	E	E	K	E	E	K	E	E	E	E	K	K	E	E	K	K	K	E	E	E	K	K	E	E	E	E	K	E	K	K	E	K	K	E	K	E	E	E	K	K
PsCam058400	78.4011	chr6LG2	345905209	2		-	-	-	-	-	-	-	-	-	-	-	-	-	-	-	-	-	-	-	-	-	-	-	-	-	-	-	-	-	-	-	-	-	-	-	-	-	-	-	-	-	-	-	-
PsCam001557	78.6444	chr6LG2	347620015	2		-	-	-	-	-	-	-	-	-	-	-	-	-	-	-	-	-	-	-	-	-	-	-	-	-	-	-	-	-	-	-	-	-	-	-	-	-	-	-	-	-	-	-	-
PsCam027225	78.6444	chr6LG2	346252521	2		E	K	K	K	E	E	K	E	E	K	E	E	E	E	K	K	E	E	K	K	K	E	E	E	K	K	E	E	E	E	K	E	K	K	E	K	K	E	K	E	E	E	K	K
PsCam030647	79.142	chr6LG2	348743654	2		E	K	K	K	E	E	K	E	E	K	E	E	E	E	K	K	E	E	K	K	K	E	E	E	K	K	E	E	E	E	K	E	K	K	E	K	K	E	K	E	E	E	K	K
PsCam000739	79.3932	chr6LG2	351173873	2		E	K	K	K	E	E	K	E	E	K	E	E	E	E	K	K	E	E	K	K	K	E	E	E	K	K	E	E	E	E	K	E	K	K	E	K	K	E	K	E	E	E	K	K
PsCam057788	79.5184	chr6LG2	352902426	2		E	K	K	K	E	E	K	E	E	K	E	E	E	E	K	K	E	E	K	K	K	E	E	E	K	K	E	E	E	E	K	E	K	K	E	K	K	E	K	E	E	E	K	K
PsCam060109	79.7696	chr6LG2	355056699	2		E	K	K	K	E	E	K	E	E	K	E	E	E	E	K	K	E	E	K	K	K	E	E	E	K	K	E	E	E	E	K	E	K	K	E	K	K	E	K	E	E	E	K	K
PsCam010978	80.146	chr6LG2	355186741	2		E	K	K	K	E	E	K	E	E	K	E	E	E	E	K	K	E	E	K	K	K	E	E	E	K	K	E	E	E	E	K	E	K	K	E	K	K	E	K	E	E	E	K	K
PsCam026593	80.146	chr6LG2	355259318	2		E	K	K	K	E	E	K	E	E	K	E	E	E	E	K	K	E	E	K	K	K	E	E	E	K	K	E	E	E	E	K	E	K	K	E	K	K	E	K	E	E	E	K	K
PsCam036812	80.396	chr6LG2	351752150	2		E	K	K	K	E	E	K	E	E	K	E	E	E	E	K	K	E	E	K	K	K	E	E	E	K	K	E	E	E	E	K	E	K	K	E	K	K	E	K	E	E	E	K	K
PsCam049665	80.7725	chr6LG2	357504029	2		E	K	K	K	E	E	K	E	E	K	E	E	E	E	K	K	E	E	K	K	K	E	E	E	K	K	E	E	E	E	K	E	K	K	E	K	K	E	K	E	E	E	K	K
PsCam044605	80.7725	chr6LG2	359013256	2		E	K	K	K	E	E	K	E	E	K	E	E	E	E	K	K	E	E	K	K	K	E	E	E	K	K	E	E	E	E	K	E	K	K	E	K	K	E	K	E	E	E	K	K
PsCam040559	104.831	chr6LG2	415054366	2		-	-	-	-	-	-	-	-	-	-	-	-	-	-	-	-	-	-	-	-	-	-	-	-	-	-	-	-	-	-	-	-	-	-	-	-	-	-	-	-	-	-	-	-
PsCam049543	104.831	chr6LG2	415091074	2		-	-	-	-	-	-	-	-	-	-	-	-	-	-	-	-	-	-	-	-	-	-	-	-	-	-	-	-	-	-	-	-	-	-	-	-	-	-	-	-	-	-	-	-
PsCam001836	104.831	chr6LG2	415150265	2		-	-	-	-	-	-	-	-	-	-	-	-	-	-	-	-	-	-	-	-	-	-	-	-	-	-	-	-	-	-	-	-	-	-	-	-	-	-	-	-	-	-	-	-
PsCam044467	104.831	chr6LG2	415179098	2		-	-	-	-	-	-	-	-	-	-	-	-	-	-	-	-	-	-	-	-	-	-	-	-	-	-	-	-	-	-	-	-	-	-	-	-	-	-	-	-	-	-	-	-
PsCam042338	104.831	chr6LG2	415189488	2		-	-	-	-	-	-	-	-	-	-	-	-	-	-	-	-	-	-	-	-	-	-	-	-	-	-	-	-	-	-	-	-	-	-	-	-	-	-	-	-	-	-	-	-
PsCam035587	104.831	chr6LG2	415200653	2		-	-	-	-	-	-	-	-	-	-	-	-	-	-	-	-	-	-	-	-	-	-	-	-	-	-	-	-	-	-	-	-	-	-	-	-	-	-	-	-	-	-	-	-
PsCam013036	104.953	chr6LG2	415326689	2		-	-	-	-	-	-	-	-	-	-	-	-	-	-	-	-	-	-	-	-	-	-	-	-	-	-	-	-	-	-	-	-	-	-	-	-	-	-	-	-	-	-	-	-
PsCam003591	104.953	chr6LG2	415406174	2		-	-	-	-	-	-	-	-	-	-	-	-	-	-	-	-	-	-	-	-	-	-	-	-	-	-	-	-	-	-	-	-	-	-	-	-	-	-	-	-	-	-	-	-
PsCam042565	105.198	chr6LG2	416182987	2		-	-	-	-	-	-	-	-	-	-	-	-	-	-	-	-	-	-	-	-	-	-	-	-	-	-	-	-	-	-	-	-	-	-	-	-	-	-	-	-	-	-	-	-
PsCam045600	105.321	chr6LG2	416313588	2		-	-	-	-	-	-	-	-	-	-	-	-	-	-	-	-	-	-	-	-	-	-	-	-	-	-	-	-	-	-	-	-	-	-	-	-	-	-	-	-	-	-	-	-
PsCam036817	105.321	chr6LG2	416650536	2		-	-	-	-	-	-	-	-	-	-	-	-	-	-	-	-	-	-	-	-	-	-	-	-	-	-	-	-	-	-	-	-	-	-	-	-	-	-	-	-	-	-	-	-
PsCam035582	105.321	chr6LG2	416654504	2		-	-	-	-	-	-	-	-	-	-	-	-	-	-	-	-	-	-	-	-	-	-	-	-	-	-	-	-	-	-	-	-	-	-	-	-	-	-	-	-	-	-	-	-
PsCam055940	105.321	chr6LG2	416793776	2		-	-	-	-	-	-	-	-	-	-	-	-	-	-	-	-	-	-	-	-	-	-	-	-	-	-	-	-	-	-	-	-	-	-	-	-	-	-	-	-	-	-	-	-
PsCam051636	105.321	chr6LG2	417331197	2		-	-	-	-	-	-	-	-	-	-	-	-	-	-	-	-	-	-	-	-	-	-	-	-	-	-	-	-	-	-	-	-	-	-	-	-	-	-	-	-	-	-	-	-
PsCam050447	105.321	chr6LG2	417288572	2		-	-	-	-	-	-	-	-	-	-	-	-	-	-	-	-	-	-	-	-	-	-	-	-	-	-	-	-	-	-	-	-	-	-	-	-	-	-	-	-	-	-	-	-
PsCam051124	105.321	chr6LG2	419014713	2		-	-	-	-	-	-	-	-	-	-	-	-	-	-	-	-	-	-	-	-	-	-	-	-	-	-	-	-	-	-	-	-	-	-	-	-	-	-	-	-	-	-	-	-
PsCam027491	105.321	chr6LG2	418799714	2		-	-	-	-	-	-	-	-	-	-	-	-	-	-	-	-	-	-	-	-	-	-	-	-	-	-	-	-	-	-	-	-	-	-	-	-	-	-	-	-	-	-	-	-
PsCam005651	105.321	chr6LG2	417408312	2		-	-	-	-	-	-	-	-	-	-	-	-	-	-	-	-	-	-	-	-	-	-	-	-	-	-	-	-	-	-	-	-	-	-	-	-	-	-	-	-	-	-	-	-
PsCam005315	105.321	chr6LG2	417407221	2		-	-	-	-	-	-	-	-	-	-	-	-	-	-	-	-	-	-	-	-	-	-	-	-	-	-	-	-	-	-	-	-	-	-	-	-	-	-	-	-	-	-	-	-
PsCam020818	105.321	chr6LG2	417405136	2		-	-	-	-	-	-	-	-	-	-	-	-	-	-	-	-	-	-	-	-	-	-	-	-	-	-	-	-	-	-	-	-	-	-	-	-	-	-	-	-	-	-	-	-
PsCam001624	105.321	chr6LG2	417734223	2		-	-	-	-	-	-	-	-	-	-	-	-	-	-	-	-	-	-	-	-	-	-	-	-	-	-	-	-	-	-	-	-	-	-	-	-	-	-	-	-	-	-	-	-
PsCam038572	105.321	chr6LG2	418201011	2		-	-	-	-	-	-	-	-	-	-	-	-	-	-	-	-	-	-	-	-	-	-	-	-	-	-	-	-	-	-	-	-	-	-	-	-	-	-	-	-	-	-	-	-
PsCam046020	105.321	chr6LG2	418163839	2		-	-	-	-	-	-	-	-	-	-	-	-	-	-	-	-	-	-	-	-	-	-	-	-	-	-	-	-	-	-	-	-	-	-	-	-	-	-	-	-	-	-	-	-
PsCam031050	105.321	chr6LG2	418141938	2		-	-	-	-	-	-	-	-	-	-	-	-	-	-	-	-	-	-	-	-	-	-	-	-	-	-	-	-	-	-	-	-	-	-	-	-	-	-	-	-	-	-	-	-
PsCam000084	105.321	chr6LG2	418119489	2		-	-	-	-	-	-	-	-	-	-	-	-	-	-	-	-	-	-	-	-	-	-	-	-	-	-	-	-	-	-	-	-	-	-	-	-	-	-	-	-	-	-	-	-
PsCam057731	105.321	chr6LG2	419220279	2		-	-	-	-	-	-	-	-	-	-	-	-	-	-	-	-	-	-	-	-	-	-	-	-	-	-	-	-	-	-	-	-	-	-	-	-	-	-	-	-	-	-	-	-
PsCam050828	105.321	chr6LG2	419227225	2		-	-	-	-	-	-	-	-	-	-	-	-	-	-	-	-	-	-	-	-	-	-	-	-	-	-	-	-	-	-	-	-	-	-	-	-	-	-	-	-	-	-	-	-
PsCam056037	105.566	chr6LG2	419554512	2		-	-	-	-	-	-	-	-	-	-	-	-	-	-	-	-	-	-	-	-	-	-	-	-	-	-	-	-	-	-	-	-	-	-	-	-	-	-	-	-	-	-	-	-
PsCam012864	105.566	chr6LG2	419112420	2		-	-	-	-	-	-	-	-	-	-	-	-	-	-	-	-	-	-	-	-	-	-	-	-	-	-	-	-	-	-	-	-	-	-	-	-	-	-	-	-	-	-	-	-
PsCam036705	106.059	chr6LG2	421525906	2		-	-	-	-	-	-	-	-	-	-	-	-	-	-	-	-	-	-	-	-	-	-	-	-	-	-	-	-	-	-	-	-	-	-	-	-	-	-	-	-	-	-	-	-
PsCam050356	106.182	chr6LG2	424794949	2		-	-	-	-	-	-	-	-	-	-	-	-	-	-	-	-	-	-	-	-	-	-	-	-	-	-	-	-	-	-	-	-	-	-	-	-	-	-	-	-	-	-	-	-
PsCam004990	106.182	chr6LG2	420456865	2		-	-	-	-	-	-	-	-	-	-	-	-	-	-	-	-	-	-	-	-	-	-	-	-	-	-	-	-	-	-	-	-	-	-	-	-	-	-	-	-	-	-	-	-
PsCam050165	106.182	chr6LG2	425432264	2		-	-	-	-	-	-	-	-	-	-	-	-	-	-	-	-	-	-	-	-	-	-	-	-	-	-	-	-	-	-	-	-	-	-	-	-	-	-	-	-	-	-	-	-
PsCam037324	106.304	chr6LG2	426142873	2		-	-	-	-	-	-	-	-	-	-	-	-	-	-	-	-	-	-	-	-	-	-	-	-	-	-	-	-	-	-	-	-	-	-	-	-	-	-	-	-	-	-	-	-
PsCam027276	106.304	chr6LG2	427968760	2		-	-	-	-	-	-	-	-	-	-	-	-	-	-	-	-	-	-	-	-	-	-	-	-	-	-	-	-	-	-	-	-	-	-	-	-	-	-	-	-	-	-	-	-
PsCam058447	106.304	chr6LG2	428049453	2		-	-	-	-	-	-	-	-	-	-	-	-	-	-	-	-	-	-	-	-	-	-	-	-	-	-	-	-	-	-	-	-	-	-	-	-	-	-	-	-	-	-	-	-
PsCam001716	106.426	chr6LG2	427071571	2		-	-	-	-	-	-	-	-	-	-	-	-	-	-	-	-	-	-	-	-	-	-	-	-	-	-	-	-	-	-	-	-	-	-	-	-	-	-	-	-	-	-	-	-
PsCam008611	106.426	chr6LG2	428107694	2		-	-	-	-	-	-	-	-	-	-	-	-	-	-	-	-	-	-	-	-	-	-	-	-	-	-	-	-	-	-	-	-	-	-	-	-	-	-	-	-	-	-	-	-
PsCam042173	106.426	chr6LG2	428427680	2		-	-	-	-	-	-	-	-	-	-	-	-	-	-	-	-	-	-	-	-	-	-	-	-	-	-	-	-	-	-	-	-	-	-	-	-	-	-	-	-	-	-	-	-
PsCam002886	106.426	chr6LG2	428395735	2		-	-	-	-	-	-	-	-	-	-	-	-	-	-	-	-	-	-	-	-	-	-	-	-	-	-	-	-	-	-	-	-	-	-	-	-	-	-	-	-	-	-	-	-
PsCam027215	106.426	chr6LG2	428390898	2		-	-	-	-	-	-	-	-	-	-	-	-	-	-	-	-	-	-	-	-	-	-	-	-	-	-	-	-	-	-	-	-	-	-	-	-	-	-	-	-	-	-	-	-
PsCam000531	106.426	chr6LG2	428367273	2		-	-	-	-	-	-	-	-	-	-	-	-	-	-	-	-	-	-	-	-	-	-	-	-	-	-	-	-	-	-	-	-	-	-	-	-	-	-	-	-	-	-	-	-
PsCam027740	106.426	chr6LG2	428351643	2		-	-	-	-	-	-	-	-	-	-	-	-	-	-	-	-	-	-	-	-	-	-	-	-	-	-	-	-	-	-	-	-	-	-	-	-	-	-	-	-	-	-	-	-
PsCam060128	106.426	chr6LG2	428309948	2		-	-	-	-	-	-	-	-	-	-	-	-	-	-	-	-	-	-	-	-	-	-	-	-	-	-	-	-	-	-	-	-	-	-	-	-	-	-	-	-	-	-	-	-
PsCam000980	106.426	chr6LG2	428308170	2		-	-	-	-	-	-	-	-	-	-	-	-	-	-	-	-	-	-	-	-	-	-	-	-	-	-	-	-	-	-	-	-	-	-	-	-	-	-	-	-	-	-	-	-
PsCam021010	106.426	chr6LG2	429460414	2		-	-	-	-	-	-	-	-	-	-	-	-	-	-	-	-	-	-	-	-	-	-	-	-	-	-	-	-	-	-	-	-	-	-	-	-	-	-	-	-	-	-	-	-
PsCam045897	107.3	chr6LG2	430018462	2		-	-	-	-	-	-	-	-	-	-	-	-	-	-	-	-	-	-	-	-	-	-	-	-	-	-	-	-	-	-	-	-	-	-	-	-	-	-	-	-	-	-	-	-
PsCam039169	107.3	chr6LG2	430020378	2		-	-	-	-	-	-	-	-	-	-	-	-	-	-	-	-	-	-	-	-	-	-	-	-	-	-	-	-	-	-	-	-	-	-	-	-	-	-	-	-	-	-	-	-
PsCam036390	107.3	chr6LG2	430774231	2		-	-	-	-	-	-	-	-	-	-	-	-	-	-	-	-	-	-	-	-	-	-	-	-	-	-	-	-	-	-	-	-	-	-	-	-	-	-	-	-	-	-	-	-
PsCam040599	107.3	chr6LG2	430548047	2		-	-	-	-	-	-	-	-	-	-	-	-	-	-	-	-	-	-	-	-	-	-	-	-	-	-	-	-	-	-	-	-	-	-	-	-	-	-	-	-	-	-	-	-
PsCam058176	107.3	chr6LG2	430455416	2		-	-	-	-	-	-	-	-	-	-	-	-	-	-	-	-	-	-	-	-	-	-	-	-	-	-	-	-	-	-	-	-	-	-	-	-	-	-	-	-	-	-	-	-
PsCam001322	107.423	chr6LG2	430387429	2		-	-	-	-	-	-	-	-	-	-	-	-	-	-	-	-	-	-	-	-	-	-	-	-	-	-	-	-	-	-	-	-	-	-	-	-	-	-	-	-	-	-	-	-
PsCam038639	117.297	chr6LG2	458208143	2		-	-	-	-	-	-	-	-	-	-	-	-	-	-	-	-	-	-	-	-	-	-	-	-	-	-	-	-	-	-	-	-	-	-	-	-	-	-	-	-	-	-	-	-
PsCam040498	117.922	chr6LG2	458674172	2		-	-	-	-	-	-	-	-	-	-	-	-	-	-	-	-	-	-	-	-	-	-	-	-	-	-	-	-	-	-	-	-	-	-	-	-	-	-	-	-	-	-	-	-
PsCam052272	118.045	chr6LG2	460206651	2		-	-	-	-	-	-	-	-	-	-	-	-	-	-	-	-	-	-	-	-	-	-	-	-	-	-	-	-	-	-	-	-	-	-	-	-	-	-	-	-	-	-	-	-
PsCam035818	118.54	chr6LG2	460507209	2		-	-	-	-	-	-	-	-	-	-	-	-	-	-	-	-	-	-	-	-	-	-	-	-	-	-	-	-	-	-	-	-	-	-	-	-	-	-	-	-	-	-	-	-
PsCam039060	119.034	chr6LG2	461956029	2		-	-	-	-	-	-	-	-	-	-	-	-	-	-	-	-	-	-	-	-	-	-	-	-	-	-	-	-	-	-	-	-	-	-	-	-	-	-	-	-	-	-	-	-
PsCam037645	119.034	chr6LG2	462175249	2		-	-	-	-	-	-	-	-	-	-	-	-	-	-	-	-	-	-	-	-	-	-	-	-	-	-	-	-	-	-	-	-	-	-	-	-	-	-	-	-	-	-	-	-
PsCam000131	119.034	chr6LG2	462186844	2		-	-	-	-	-	-	-	-	-	-	-	-	-	-	-	-	-	-	-	-	-	-	-	-	-	-	-	-	-	-	-	-	-	-	-	-	-	-	-	-	-	-	-	-
PsCam045502	119.287	chr6LG2	463632843	2		K	E	K	E	E	K	E	K	K	E	E	E	K	E	K	K	K	E	E	K	E	E	K	E	K	K	E	K	E	E	K	K	K	E	E	K	K	E	E	E	E	E	E	K
PsCam045759	119.287	chr6LG2	464150712	2		K	E	K	E	E	K	E	K	K	E	E	E	K	E	K	K	K	E	E	K	E	E	K	E	K	K	E	K	E	E	K	K	K	E	E	K	K	E	E	E	E	E	E	K
PsCam035327	119.663	chr6LG2	464220723	2		K	E	K	E	E	K	E	K	K	E	E	E	K	E	K	K	K	E	E	K	E	E	K	E	K	K	E	K	E	E	K	K	K	E	E	K	K	E	E	E	E	E	E	K
PsCam042395	120.295	chr6LG2	464837378	2		K	E	K	E	E	K	E	K	K	E	E	E	K	E	K	K	K	E	E	K	E	E	K	K	K	K	E	K	E	E	K	K	K	E	E	K	K	E	E	E	E	E	E	K
PsCam016783	120.42	chr6LG2	464778354	2		K	E	K	E	E	K	E	K	K	E	E	E	K	E	K	K	K	E	E	K	E	E	K	K	K	K	E	K	E	E	K	K	K	E	E	K	K	E	E	E	E	E	E	K
PsCam038707	120.42	chr6LG2	465185467	2		K	E	K	E	E	K	E	K	K	E	E	E	K	E	K	K	K	E	E	K	E	E	K	K	K	K	E	K	E	E	K	K	K	E	E	K	K	E	E	E	E	E	E	K
PsCam043395	120.42	chr6LG2	465264286	2		K	E	K	E	E	K	E	K	K	E	E	E	K	E	K	K	K	E	E	K	E	E	K	K	K	K	E	K	E	E	K	K	K	E	E	K	K	E	E	E	E	E	E	K
PsCam057328	120.42	scaffold01602	54402	2		K	E	K	E	E	K	E	K	K	E	E	E	K	E	K	K	K	E	E	K	E	E	K	K	K	K	E	K	E	E	K	K	K	E	E	K	K	E	E	E	E	E	E	K
PsCam038512	120.544	chr6LG2	465589982	2		K	E	K	E	E	K	E	K	K	E	E	E	K	E	K	K	K	E	E	K	E	E	K	K	K	K	E	K	E	E	K	K	K	E	E	K	K	E	E	E	E	E	E	K
PsCam050050	120.544	chr6LG2	465911467	2		K	E	K	E	E	K	E	K	K	E	E	E	K	E	K	K	K	E	E	K	E	E	K	K	K	K	E	K	E	E	K	K	K	E	E	K	K	E	E	E	E	E	E	K
PsCam043049	120.669	chr6LG2	465933222	2		K	E	K	E	E	K	E	K	K	E	E	E	K	E	K	K	K	E	E	K	E	E	K	K	K	K	E	K	E	E	K	K	K	E	E	K	K	E	E	E	E	E	E	K
PsCam029352	120.919	chr6LG2	466515847	2		K	E	K	E	E	K	E	K	K	E	E	E	K	E	K	K	K	E	E	K	E	E	K	K	K	K	E	K	E	E	K	K	K	E	K	K	K	E	E	E	E	E	E	K
PsCam040394	120.919	chr6LG2	466539606	2		K	E	K	E	E	K	E	K	K	E	E	E	K	E	K	K	K	E	E	K	E	E	K	K	K	K	E	K	E	E	K	K	K	E	K	K	K	E	E	E	E	E	E	K
PsCam057517	120.919	chr6LG2	466626155	2		K	E	K	E	E	K	E	K	K	E	E	E	K	E	K	K	K	E	E	K	E	E	K	K	K	K	E	K	E	E	K	K	K	E	K	K	K	E	E	E	E	E	E	K
PsCam048448	120.919	chr6LG2	466473315	2		K	E	K	E	E	K	E	K	K	E	E	E	K	E	K	K	K	E	E	K	E	E	K	K	K	K	E	K	E	E	K	K	K	E	K	K	K	E	E	E	E	E	E	K
PsCam037087	121.166	chr6LG2	466063968	2		K	E	K	E	E	K	E	K	K	E	E	E	K	E	K	K	K	E	E	K	E	E	K	K	K	K	E	K	E	E	K	K	K	E	K	K	K	E	E	E	E	E	E	K
PsCam035258	121.542	chr6LG2	466919031	2		K	E	K	E	E	K	E	K	K	E	E	E	K	E	K	K	K	E	E	K	E	E	K	K	K	K	E	K	E	E	K	K	K	E	K	K	K	E	E	E	E	E	E	K
PsCam045075	121.542	chr6LG2	467353209	2		K	E	K	E	E	K	E	K	K	E	E	E	K	E	K	K	K	E	E	K	E	E	K	K	K	K	E	K	E	E	K	K	K	E	K	K	K	E	E	E	E	E	E	K
PsCam035979	121.792	chr6LG2	467481313	2		K	E	K	E	E	K	E	K	K	E	E	E	K	E	K	K	K	E	E	K	E	E	K	K	K	K	E	K	E	E	K	E	K	E	K	K	K	E	K	E	E	E	E	K
PsCam038938	121.792	chr6LG2	467483419	2		K	E	K	E	E	K	E	K	K	E	E	E	K	E	K	K	K	E	E	K	E	E	K	K	K	K	E	K	E	E	K	E	K	E	K	K	K	E	K	E	E	E	E	K
PsCam003979	121.792	chr6LG2	467489014	2		K	E	K	E	E	K	E	K	K	E	E	E	K	E	K	K	K	E	E	K	E	E	K	K	K	K	E	K	E	E	K	E	K	E	K	K	K	E	K	E	E	E	E	K
PsCam020939	121.792	chr6LG2	467872390	2		K	E	K	E	E	K	E	K	K	E	E	E	K	E	K	K	K	E	E	K	E	E	K	K	K	K	E	K	E	E	K	E	K	E	K	K	K	E	K	E	E	E	E	K
PsCam001869	121.792	chr6LG2	467616306	2		K	E	K	E	E	K	E	K	K	E	E	E	K	E	K	K	K	E	E	K	E	E	K	K	K	K	E	K	E	E	K	E	K	E	K	K	K	E	K	E	E	E	E	K
PsCam043295	121.792	chr6LG2	467625585	2		K	E	K	E	E	K	E	K	K	E	E	E	K	E	K	K	K	E	E	K	E	E	K	K	K	K	E	K	E	E	K	E	K	E	K	K	K	E	K	E	E	E	E	K
PsCam052094	121.792	chr6LG2	468245519	2		K	E	K	E	E	K	E	K	K	E	E	E	K	E	K	K	K	E	E	K	E	E	K	K	K	K	E	K	E	E	K	E	K	E	K	K	K	E	K	E	E	E	E	K
PsCam045565	121.792	chr6LG2	468609999	2		K	E	K	E	E	K	E	K	K	E	E	E	K	E	K	K	K	E	E	K	E	E	K	K	K	K	E	K	E	E	K	E	K	E	K	K	K	E	K	E	E	E	E	K
PsCam036836	121.792	chr6LG2	468859527	2		K	E	K	E	E	K	E	K	K	E	E	E	K	E	K	K	K	E	E	K	E	E	K	K	K	K	E	K	E	E	K	E	K	E	K	K	K	E	K	E	E	E	E	K
PsCam001273	121.792	chr6LG2	469100633	2		K	E	K	E	E	K	E	K	K	E	E	E	K	E	K	K	K	E	E	K	E	E	K	K	K	K	E	K	E	E	K	E	K	E	K	K	K	E	K	E	E	E	E	K
PsCam036858	122.046	chr6LG2	470428133	2		K	E	K	E	E	K	E	K	E	E	E	E	K	E	K	K	K	E	E	K	E	E	K	K	K	K	E	K	E	E	K	E	K	E	K	K	K	E	K	E	E	E	E	K
PsCam045234	122.564	chr6LG2	469297578	2		-	-	-	-	-	-	-	-	-	-	-	-	-	-	-	-	-	-	-	-	-	-	-	-	-	-	-	-	-	-	-	-	-	-	-	-	-	-	-	-	-	-	-	-
PsCam028571	122.687	chr3LG5	434604508	2		-	-	-	-	-	-	-	-	-	-	-	-	-	-	-	-	-	-	-	-	-	-	-	-	-	-	-	-	-	-	-	-	-	-	-	-	-	-	-	-	-	-	-	-
PsCam044875	122.687	chr6LG2	471230185	2		-	-	-	-	-	-	-	-	-	-	-	-	-	-	-	-	-	-	-	-	-	-	-	-	-	-	-	-	-	-	-	-	-	-	-	-	-	-	-	-	-	-	-	-
PsCam037649	122.809	chr6LG2	471550270	2		-	-	-	-	-	-	-	-	-	-	-	-	-	-	-	-	-	-	-	-	-	-	-	-	-	-	-	-	-	-	-	-	-	-	-	-	-	-	-	-	-	-	-	-
PsCam038661	122.809	chr6LG2	471710633	2		-	-	-	-	-	-	-	-	-	-	-	-	-	-	-	-	-	-	-	-	-	-	-	-	-	-	-	-	-	-	-	-	-	-	-	-	-	-	-	-	-	-	-	-
PsCam044849	122.809	chr6LG2	471721907	2		-	-	-	-	-	-	-	-	-	-	-	-	-	-	-	-	-	-	-	-	-	-	-	-	-	-	-	-	-	-	-	-	-	-	-	-	-	-	-	-	-	-	-	-
PsCam036092	122.931	chr6LG2	472091989	2		-	-	-	-	-	-	-	-	-	-	-	-	-	-	-	-	-	-	-	-	-	-	-	-	-	-	-	-	-	-	-	-	-	-	-	-	-	-	-	-	-	-	-	-
PsCam007613	123.679	chr6LG2	472820846	2		-	-	-	-	-	-	-	-	-	-	-	-	-	-	-	-	-	-	-	-	-	-	-	-	-	-	-	-	-	-	-	-	-	-	-	-	-	-	-	-	-	-	-	-
PsCam053444	124.049	chr6LG2	474232926	2		-	-	-	-	-	-	-	-	-	-	-	-	-	-	-	-	-	-	-	-	-	-	-	-	-	-	-	-	-	-	-	-	-	-	-	-	-	-	-	-	-	-	-	-
PsCam043182	124.049	chr6LG2	474253819	2		-	-	-	-	-	-	-	-	-	-	-	-	-	-	-	-	-	-	-	-	-	-	-	-	-	-	-	-	-	-	-	-	-	-	-	-	-	-	-	-	-	-	-	-
PsCam049507	124.049	chr6LG2	474272118	2		-	-	-	-	-	-	-	-	-	-	-	-	-	-	-	-	-	-	-	-	-	-	-	-	-	-	-	-	-	-	-	-	-	-	-	-	-	-	-	-	-	-	-	-
PsCam003587	124.049	chr6LG2	474432640	2		-	-	-	-	-	-	-	-	-	-	-	-	-	-	-	-	-	-	-	-	-	-	-	-	-	-	-	-	-	-	-	-	-	-	-	-	-	-	-	-	-	-	-	-
PsCam048598	124.171	chr6LG2	474439645	2		-	-	-	-	-	-	-	-	-	-	-	-	-	-	-	-	-	-	-	-	-	-	-	-	-	-	-	-	-	-	-	-	-	-	-	-	-	-	-	-	-	-	-	-
PsCam049148	124.293	chr6LG2	473503836	2		-	-	-	-	-	-	-	-	-	-	-	-	-	-	-	-	-	-	-	-	-	-	-	-	-	-	-	-	-	-	-	-	-	-	-	-	-	-	-	-	-	-	-	-
PsCam021265	124.293	chr6LG2	473530330	2		-	-	-	-	-	-	-	-	-	-	-	-	-	-	-	-	-	-	-	-	-	-	-	-	-	-	-	-	-	-	-	-	-	-	-	-	-	-	-	-	-	-	-	-
PsCam010896	125.039	chr6LG2	475917231	2		-	-	-	-	-	-	-	-	-	-	-	-	-	-	-	-	-	-	-	-	-	-	-	-	-	-	-	-	-	-	-	-	-	-	-	-	-	-	-	-	-	-	-	-
PsCam015707	125.039	chr6LG2	476078914	2		-	-	-	-	-	-	-	-	-	-	-	-	-	-	-	-	-	-	-	-	-	-	-	-	-	-	-	-	-	-	-	-	-	-	-	-	-	-	-	-	-	-	-	-
PsCam057649	125.534	chr6LG2	477807695	2		-	-	-	-	-	-	-	-	-	-	-	-	-	-	-	-	-	-	-	-	-	-	-	-	-	-	-	-	-	-	-	-	-	-	-	-	-	-	-	-	-	-	-	-
PsCam043452	125.534	scaffold04086	14760	2		-	-	-	-	-	-	-	-	-	-	-	-	-	-	-	-	-	-	-	-	-	-	-	-	-	-	-	-	-	-	-	-	-	-	-	-	-	-	-	-	-	-	-	-
PsCam042563	125.534	chr6LG2	477718418	2		-	-	-	-	-	-	-	-	-	-	-	-	-	-	-	-	-	-	-	-	-	-	-	-	-	-	-	-	-	-	-	-	-	-	-	-	-	-	-	-	-	-	-	-
PsCam033972	125.534	chr6LG2	477883441	2		-	-	-	-	-	-	-	-	-	-	-	-	-	-	-	-	-	-	-	-	-	-	-	-	-	-	-	-	-	-	-	-	-	-	-	-	-	-	-	-	-	-	-	-
PsCam035851	125.534	chr6LG2	478192443	2		-	-	-	-	-	-	-	-	-	-	-	-	-	-	-	-	-	-	-	-	-	-	-	-	-	-	-	-	-	-	-	-	-	-	-	-	-	-	-	-	-	-	-	-
PsCam017040	125.657	chr6LG2	479383436	2		-	-	-	-	-	-	-	-	-	-	-	-	-	-	-	-	-	-	-	-	-	-	-	-	-	-	-	-	-	-	-	-	-	-	-	-	-	-	-	-	-	-	-	-
PsCam001608	125.657	chr6LG2	479385221	2		-	-	-	-	-	-	-	-	-	-	-	-	-	-	-	-	-	-	-	-	-	-	-	-	-	-	-	-	-	-	-	-	-	-	-	-	-	-	-	-	-	-	-	-
PsCam049620	125.903	chr6LG2	479100737	2		-	-	-	-	-	-	-	-	-	-	-	-	-	-	-	-	-	-	-	-	-	-	-	-	-	-	-	-	-	-	-	-	-	-	-	-	-	-	-	-	-	-	-	-
PsCam043238	126.149	chr6LG2	480034535	2		-	-	-	-	-	-	-	-	-	-	-	-	-	-	-	-	-	-	-	-	-	-	-	-	-	-	-	-	-	-	-	-	-	-	-	-	-	-	-	-	-	-	-	-
PsCam048803	126.149	chr6LG2	479936065	2		-	-	-	-	-	-	-	-	-	-	-	-	-	-	-	-	-	-	-	-	-	-	-	-	-	-	-	-	-	-	-	-	-	-	-	-	-	-	-	-	-	-	-	-
PsCam044459	126.149	chr6LG2	479922302	2		-	-	-	-	-	-	-	-	-	-	-	-	-	-	-	-	-	-	-	-	-	-	-	-	-	-	-	-	-	-	-	-	-	-	-	-	-	-	-	-	-	-	-	-
PsCam034825	126.149	chr6LG2	479909815	2		-	-	-	-	-	-	-	-	-	-	-	-	-	-	-	-	-	-	-	-	-	-	-	-	-	-	-	-	-	-	-	-	-	-	-	-	-	-	-	-	-	-	-	-
PsCam034831	126.272	chr6LG2	479893545	2		-	-	-	-	-	-	-	-	-	-	-	-	-	-	-	-	-	-	-	-	-	-	-	-	-	-	-	-	-	-	-	-	-	-	-	-	-	-	-	-	-	-	-	-
PsCam036970	126.272	chr6LG2	479873380	2		-	-	-	-	-	-	-	-	-	-	-	-	-	-	-	-	-	-	-	-	-	-	-	-	-	-	-	-	-	-	-	-	-	-	-	-	-	-	-	-	-	-	-	-
PsCam056970	126.394	chr6LG2	480358086	2		-	-	-	-	-	-	-	-	-	-	-	-	-	-	-	-	-	-	-	-	-	-	-	-	-	-	-	-	-	-	-	-	-	-	-	-	-	-	-	-	-	-	-	-
		chromosome	position	lg III		1001	1002	1003	1004	1005	1006	1008	1009	1010	1011	1012	1014	1015	1017	1018	1020	1021	1022	1023	1024	1025	1026	1027	1028	1029	1030	1031	1032	1033	1034	1035	1036	1037	1038	1039	1040	1041	1042	1043	1044	1045	1047	1048	1049
PsCam042571	0	chr5LG3	915874	3		-	-	-	-	-	-	-	-	-	-	-	-	-	-	-	-	-	-	-	-	-	-	-	-	-	-	-	-	-	-	-	-	-	-	-	-	-	-	-	-	-	-	-	-
PsCam050459	0	chr5LG3	957490	3		-	-	-	-	-	-	-	-	-	-	-	-	-	-	-	-	-	-	-	-	-	-	-	-	-	-	-	-	-	-	-	-	-	-	-	-	-	-	-	-	-	-	-	-
PsCam043693	0	chr5LG3	989588	3		-	-	-	-	-	-	-	-	-	-	-	-	-	-	-	-	-	-	-	-	-	-	-	-	-	-	-	-	-	-	-	-	-	-	-	-	-	-	-	-	-	-	-	-
PsCam026756	0	chr5LG3	1329643	3		-	-	-	-	-	-	-	-	-	-	-	-	-	-	-	-	-	-	-	-	-	-	-	-	-	-	-	-	-	-	-	-	-	-	-	-	-	-	-	-	-	-	-	-
PsCam042914	0	chr5LG3	1309222	3		-	-	-	-	-	-	-	-	-	-	-	-	-	-	-	-	-	-	-	-	-	-	-	-	-	-	-	-	-	-	-	-	-	-	-	-	-	-	-	-	-	-	-	-
PsCam042454	0.1221	chr5LG3	1483398	3		-	-	-	-	-	-	-	-	-	-	-	-	-	-	-	-	-	-	-	-	-	-	-	-	-	-	-	-	-	-	-	-	-	-	-	-	-	-	-	-	-	-	-	-
PsCam038837	0.1221	chr5LG3	1511754	3		-	-	-	-	-	-	-	-	-	-	-	-	-	-	-	-	-	-	-	-	-	-	-	-	-	-	-	-	-	-	-	-	-	-	-	-	-	-	-	-	-	-	-	-
PsCam044477	0.1221	chr5LG3	1519847	3		-	-	-	-	-	-	-	-	-	-	-	-	-	-	-	-	-	-	-	-	-	-	-	-	-	-	-	-	-	-	-	-	-	-	-	-	-	-	-	-	-	-	-	-
PsCam036202	0.1221	chr5LG3	2108700	3		-	-	-	-	-	-	-	-	-	-	-	-	-	-	-	-	-	-	-	-	-	-	-	-	-	-	-	-	-	-	-	-	-	-	-	-	-	-	-	-	-	-	-	-
PsCam001555	0.1221	chr5LG3	2110884	3		-	-	-	-	-	-	-	-	-	-	-	-	-	-	-	-	-	-	-	-	-	-	-	-	-	-	-	-	-	-	-	-	-	-	-	-	-	-	-	-	-	-	-	-
PsCam033344	0.1221	chr5LG3	2133872	3		-	-	-	-	-	-	-	-	-	-	-	-	-	-	-	-	-	-	-	-	-	-	-	-	-	-	-	-	-	-	-	-	-	-	-	-	-	-	-	-	-	-	-	-
PsCam009950	0.1221	chr5LG3	2165428	3		-	-	-	-	-	-	-	-	-	-	-	-	-	-	-	-	-	-	-	-	-	-	-	-	-	-	-	-	-	-	-	-	-	-	-	-	-	-	-	-	-	-	-	-
PsCam050097	0.1221	chr5LG3	2173867	3		-	-	-	-	-	-	-	-	-	-	-	-	-	-	-	-	-	-	-	-	-	-	-	-	-	-	-	-	-	-	-	-	-	-	-	-	-	-	-	-	-	-	-	-
PsCam037361	0.1221	chr5LG3	1786886	3		-	-	-	-	-	-	-	-	-	-	-	-	-	-	-	-	-	-	-	-	-	-	-	-	-	-	-	-	-	-	-	-	-	-	-	-	-	-	-	-	-	-	-	-
PsCam050547	0.1221	chr5LG3	3238280	3		K	E	K	E	K	K	K	K	K	E	K	E	E	K	K	K	E	E	K	K	K	K	E	K	E	E	K	K	E	E	K	K	E	K	K	K	E	K	K	E	E	E	E	K
PsCam004624	0.1221	chr5LG3	2858162	3		-	-	-	-	-	-	-	-	-	-	-	-	-	-	-	-	-	-	-	-	-	-	-	-	-	-	-	-	-	-	-	-	-	-	-	-	-	-	-	-	-	-	-	-
PsCam057658	0.3596	chr5LG3	2721119	3		-	-	-	-	-	-	-	-	-	-	-	-	-	-	-	-	-	-	-	-	-	-	-	-	-	-	-	-	-	-	-	-	-	-	-	-	-	-	-	-	-	-	-	-
PsCam048368	0.3596	chr5LG3	2793860	3		K	E	K	E	K	K	K	K	K	E	K	-	E	K	K	K	E	E	K	K	K	K	E	K	E	E	K	K	E	E	K	K	E	K	K	K	E	K	K	E	E	E	E	K
PsCam010964	0.3596	chr5LG3	3445343	3		-	-	-	-	-	-	-	-	-	-	-	-	-	-	-	-	-	-	-	-	-	-	-	-	-	-	-	-	-	-	-	-	-	-	-	-	-	-	-	-	-	-	-	-
PsCam011119	0.3596	chr5LG3	3447691	3		K	E	K	E	K	K	K	K	K	E	K	-	E	K	K	K	E	E	K	K	K	K	E	K	E	E	K	K	E	E	K	K	E	K	K	K	E	K	K	E	E	E	E	K
PsCam000211	0.3596	chr5LG3	3451320	3		K	E	K	E	K	K	K	K	K	E	K	-	E	K	K	K	E	E	K	K	K	K	E	K	E	E	K	K	E	E	K	K	E	K	K	K	E	K	K	E	E	E	E	K
PsCam045861	0.3596	chr5LG3	3461396	3		-	-	-	-	-	-	-	-	-	-	-	-	-	-	-	-	-	-	-	-	-	-	-	-	-	-	-	-	-	-	-	-	-	-	-	-	-	-	-	-	-	-	-	-
PsCam060256	0.3596	chr5LG3	3465343	3		-	-	-	-	-	-	-	-	-	-	-	-	-	-	-	-	-	-	-	-	-	-	-	-	-	-	-	-	-	-	-	-	-	-	-	-	-	-	-	-	-	-	-	-
PsCam014672	0.3596	chr5LG3	3555352	3		-	-	-	-	-	-	-	-	-	-	-	-	-	-	-	-	-	-	-	-	-	-	-	-	-	-	-	-	-	-	-	-	-	-	-	-	-	-	-	-	-	-	-	-
PsCam037779	0.6128	chr5LG3	3257305	3		-	-	-	-	-	-	-	-	-	-	-	-	-	-	-	-	-	-	-	-	-	-	-	-	-	-	-	-	-	-	-	-	-	-	-	-	-	-	-	-	-	-	-	-
PsCam024966	1.384	chr5LG3	362478	3		K	E	K	E	K	K	K	K	K	E	K	-	E	K	K	K	E	E	K	K	K	K	E	K	E	E	E	K	E	E	K	K	E	K	K	K	E	K	K	E	E	E	E	K
PsCam036634	1.384	chr5LG3	5113345	3		K	E	K	E	K	K	K	K	K	E	K	E	E	K	K	K	E	E	K	K	K	K	E	K	E	E	E	K	E	E	K	K	E	K	K	K	E	K	K	E	E	E	E	K
PsCam029828	1.384	chr5LG3	5129439	3		K	E	K	E	K	K	K	K	K	E	K	-	E	K	K	K	E	E	K	K	K	K	E	K	E	E	E	K	E	E	K	K	E	K	K	K	E	K	K	E	E	E	E	K
PsCam052578	1.384	chr5LG3	5155597	3		K	E	K	E	K	K	K	K	K	E	K	-	E	K	K	K	E	E	K	K	K	K	E	K	E	E	E	K	E	E	K	K	E	K	K	K	E	K	K	E	E	E	E	K
PsCam000190	1.384	chr5LG3	5179882	3		K	E	K	E	K	K	K	K	K	E	K	-	E	K	K	K	E	E	K	K	K	K	E	K	E	E	E	K	E	E	K	K	E	K	K	K	E	K	K	E	E	E	E	K
PsCam012314	1.384	chr5LG3	5830241	3		-	-	-	-	-	-	-	-	-	-	-	-	-	-	-	-	-	-	-	-	-	-	-	-	-	-	-	-	-	-	-	-	-	-	-	-	-	-	-	-	-	-	-	-
PsCam029913	1.384	chr5LG3	5832551	3		-	-	-	-	-	-	-	-	-	-	-	-	-	-	-	-	-	-	-	-	-	-	-	-	-	-	-	-	-	-	-	-	-	-	-	-	-	-	-	-	-	-	-	-
PsCam028135	1.384	chr5LG3	5848970	3		K	E	K	E	K	K	K	K	K	E	K	E	E	K	K	K	E	E	K	K	K	K	E	K	E	E	E	K	E	E	K	K	E	K	K	K	E	K	K	E	E	E	E	K
PsCam049257	1.384	chr5LG3	5901778	3		K	E	K	E	K	K	K	K	K	E	K	E	E	K	K	K	E	E	K	K	K	K	E	K	E	E	E	K	E	E	K	K	E	K	K	K	E	K	K	E	E	E	E	K
PsCam054074	1.384	chr5LG3	5938375	3		K	E	K	E	K	K	K	K	K	E	K	-	E	K	K	K	E	E	K	K	K	K	E	K	E	E	E	K	E	E	K	K	E	K	K	K	E	K	K	E	E	E	E	K
PsCam048208	1.384	chr5LG3	4834167	3		K	E	K	E	K	K	K	K	K	E	K	-	E	K	K	K	E	E	K	K	K	K	E	K	E	E	E	K	E	E	K	K	E	K	K	K	E	K	K	E	E	E	E	K
PsCam034910	1.384	chr5LG3	5381756	3		K	E	K	E	K	K	K	K	K	E	K	E	E	K	K	K	E	E	K	K	K	K	E	K	E	E	E	K	E	E	K	K	K	K	K	K	E	K	K	E	E	E	E	K
PsCam042160	1.384	chr5LG3	6146231	3		-	-	-	-	-	-	-	-	-	-	-	-	-	-	-	-	-	-	-	-	-	-	-	-	-	-	-	-	-	-	-	-	-	-	-	-	-	-	-	-	-	-	-	-
PsCam050972	1.6215	chr5LG3	7125309	3		K	E	K	E	K	K	K	K	K	E	K	E	E	K	K	K	E	E	K	K	K	K	E	K	E	E	E	K	E	E	K	K	K	K	K	K	E	K	K	E	E	E	E	K
PsCam051287	1.6215	chr5LG3	7519091	3		K	E	K	E	K	K	K	K	K	E	K	-	E	K	K	K	E	E	K	K	K	K	E	K	E	E	E	K	E	E	K	K	K	K	K	K	E	K	K	E	E	E	E	K
PsCam028697	1.6215	chr5LG3	6616693	3		-	-	-	-	-	-	-	-	-	-	-	-	-	-	-	-	-	-	-	-	-	-	-	-	-	-	-	-	-	-	-	-	-	-	-	-	-	-	-	-	-	-	-	-
PsCam023220	1.9906	chr5LG3	8057453	3		-	-	-	-	-	-	-	-	-	-	-	-	-	-	-	-	-	-	-	-	-	-	-	-	-	-	-	-	-	-	-	-	-	-	-	-	-	-	-	-	-	-	-	-
PsCam036695	1.9906	chr5LG3	8058315	3		-	-	-	-	-	-	-	-	-	-	-	-	-	-	-	-	-	-	-	-	-	-	-	-	-	-	-	-	-	-	-	-	-	-	-	-	-	-	-	-	-	-	-	-
PsCam034412	2.4844	chr5LG3	8257432	3		-	-	-	-	-	-	-	-	-	-	-	-	-	-	-	-	-	-	-	-	-	-	-	-	-	-	-	-	-	-	-	-	-	-	-	-	-	-	-	-	-	-	-	-
PsCam044685	2.4844	chr5LG3	8370850	3		-	-	-	-	-	-	-	-	-	-	-	-	-	-	-	-	-	-	-	-	-	-	-	-	-	-	-	-	-	-	-	-	-	-	-	-	-	-	-	-	-	-	-	-
PsCam056741	2.4844	chr5LG3	8407012	3		-	-	-	-	-	-	-	-	-	-	-	-	-	-	-	-	-	-	-	-	-	-	-	-	-	-	-	-	-	-	-	-	-	-	-	-	-	-	-	-	-	-	-	-
PsCam000548	2.4844	chr5LG3	8409300	3		-	-	-	-	-	-	-	-	-	-	-	-	-	-	-	-	-	-	-	-	-	-	-	-	-	-	-	-	-	-	-	-	-	-	-	-	-	-	-	-	-	-	-	-
PsCam036522	2.9946	chr5LG3	9880389	3		-	-	-	-	-	-	-	-	-	-	-	-	-	-	-	-	-	-	-	-	-	-	-	-	-	-	-	-	-	-	-	-	-	-	-	-	-	-	-	-	-	-	-	-
PsCam046326	3.7658	chr5LG3	11849399	3		K	K	K	K	K	K	K	K	K	E	K	-	E	K	K	K	E	E	K	K	K	E	E	K	E	E	E	K	E	E	K	K	K	K	K	K	E	K	K	E	E	E	E	K
PsCam001835	3.8907	chr5LG3	12182397	3		K	K	K	K	K	K	K	K	K	E	K	-	E	K	K	K	E	E	K	K	K	E	E	K	E	E	E	K	E	E	K	K	K	K	K	K	E	K	K	E	E	E	E	K
PsCam042336	4.3957	chr5LG3	13973404	3		K	K	K	K	K	K	K	K	K	E	K	E	E	K	K	K	E	E	K	K	K	E	E	K	E	E	E	K	E	E	K	K	K	K	K	K	E	K	K	E	E	E	E	K
PsCam028112	4.3957	chr5LG3	185272274	3		K	K	K	K	K	K	K	K	K	E	K	E	E	K	K	K	E	E	K	K	K	E	E	K	E	E	E	K	E	E	K	K	K	K	K	K	E	K	K	E	E	E	E	K
PsCam002545	4.5206	chr5LG3	14243307	3		K	K	K	K	K	K	K	K	K	E	K	-	E	K	K	K	E	E	K	K	K	E	E	K	E	E	E	K	E	E	K	K	K	K	K	K	E	K	K	E	E	E	E	K
PsCam055996	4.6457	chr5LG3	14381513	3		K	K	K	K	K	K	K	K	K	E	K	E	E	K	K	K	E	E	K	K	K	E	E	K	E	E	E	K	E	E	K	K	K	K	K	K	E	K	K	E	E	E	E	K
PsCam039665	4.6457	chr5LG3	14383232	3		K	K	K	K	K	K	K	K	K	E	K	E	E	K	K	K	E	E	K	K	K	E	E	K	E	E	E	K	E	E	K	K	K	K	K	K	E	K	K	E	E	E	E	K
PsCam048989	4.7709	chr5LG3	14720096	3		K	K	K	K	K	K	K	K	K	E	K	E	E	K	K	K	E	E	K	K	K	E	E	K	E	E	E	K	E	E	K	K	K	K	K	K	E	K	K	K	E	E	E	K
PsCam050568	4.7709	chr5LG3	14740164	3		K	K	K	K	K	K	K	K	K	E	K	-	E	K	K	K	E	E	K	K	K	E	E	K	E	E	E	K	E	E	K	K	K	K	K	K	E	K	K	K	E	E	E	K
PsCam045441	5.1482	chr5LG3	17355736	3		K	K	K	K	K	K	K	K	K	E	K	E	E	K	K	K	E	E	K	K	K	E	E	K	E	E	E	K	E	E	K	K	K	K	K	K	E	K	K	K	E	E	E	K
PsCam049233	5.1482	chr5LG3	17377451	3		K	K	K	K	K	K	K	K	K	E	K	E	E	K	K	K	E	E	K	K	K	E	E	K	E	E	E	K	E	E	K	K	K	K	K	K	E	K	K	K	E	E	E	K
PsCam016428	5.1482	chr5LG3	17846597	3		K	K	K	K	K	K	K	K	K	E	K	-	E	K	K	K	E	E	K	K	K	E	E	K	E	E	E	K	E	E	K	K	K	K	K	K	E	K	K	K	E	E	E	K
PsCam034805	6.6947	chr5LG3	16630135	3		K	K	K	K	K	K	K	K	K	E	K	-	E	K	K	K	E	E	K	K	K	E	E	K	E	E	E	K	E	E	K	K	K	K	K	K	E	K	K	K	E	E	E	K
PsCam035627	6.6947	scaffold00498	92466	3		K	K	K	K	K	K	K	K	K	E	K	E	E	K	K	K	E	E	K	K	K	E	E	K	E	E	E	K	E	E	K	K	K	K	K	K	E	K	K	K	E	E	E	K
PsCam028203	6.6947	scaffold02670	215432	3		K	K	K	K	K	K	K	K	K	E	K	-	E	K	K	K	E	E	K	K	K	E	E	K	E	E	E	K	E	E	K	K	K	K	K	K	E	K	K	K	E	E	E	K
PsCam038621	6.6947	scaffold02670	216738	3		K	K	K	K	K	K	K	K	K	E	K	-	E	K	K	K	E	E	K	K	K	E	E	K	E	E	E	K	E	E	K	K	K	K	K	K	E	K	K	K	E	E	E	K
PsCam056835	6.6947	chr5LG3	289766937	3		K	K	K	K	K	K	K	K	K	E	K	E	E	K	K	K	E	E	K	K	K	E	E	K	E	E	E	K	E	E	K	K	K	K	K	K	E	K	K	K	E	E	E	K
PsCam022891	6.6947	chr5LG3	19784184	3		K	K	K	K	K	K	K	K	K	E	K	E	E	K	K	K	E	E	K	K	K	E	E	K	E	E	E	K	E	E	K	K	K	K	K	K	E	K	K	K	E	E	E	K
PsCam001649	6.6947	chr5LG3	20477100	3		K	K	K	K	K	K	K	K	K	E	K	-	E	K	K	K	E	E	K	K	K	E	E	K	E	E	E	K	E	E	K	K	K	K	K	K	E	K	K	K	E	E	E	K
PsCam004644	6.9381	scaffold03811	47480	3		K	K	K	K	K	K	K	K	K	E	K	-	E	K	K	K	E	E	K	K	K	E	E	K	E	E	E	K	E	E	K	K	K	K	K	K	E	K	K	K	E	E	E	K
PsCam028994	7.1814	chr5LG3	19093927	3		K	K	K	K	K	K	K	K	K	E	K	E	E	K	K	K	E	E	K	K	K	E	E	K	E	E	E	K	E	E	K	K	K	K	K	K	E	K	K	K	E	E	E	K
PsCam034425	7.1814	chr5LG3	19345006	3		K	K	K	K	K	K	K	K	K	E	K	-	E	K	K	K	E	E	K	K	K	E	E	K	E	E	E	K	E	E	K	K	K	K	K	K	E	K	K	K	E	E	E	K
PsCam060144	7.3023	chr5LG3	21104997	3		K	K	K	K	K	K	K	K	K	E	K	-	E	K	K	K	K	E	K	K	K	E	E	K	E	E	E	K	E	E	K	K	K	K	K	K	E	K	K	K	E	E	E	K
PsCam043229	7.3023	chr5LG3	20270139	3		K	K	K	K	K	K	K	K	K	E	K	-	E	K	K	K	K	E	K	K	K	E	E	K	E	E	E	K	E	E	K	K	K	K	K	K	E	K	K	K	E	E	E	K
PsCam038888	7.3023	chr5LG3	20814647	3		K	K	K	K	K	K	K	K	K	E	K	-	E	K	K	K	K	E	K	K	K	E	E	K	E	E	E	K	E	E	K	K	K	K	K	K	E	K	K	K	E	E	E	K
PsCam048255	7.3023	chr5LG3	20820451	3		K	K	K	K	K	K	K	K	K	E	K	E	E	K	K	K	K	E	K	K	K	E	E	K	E	E	E	K	E	E	K	K	K	K	K	K	E	K	K	K	E	E	E	K
PsCam001399	7.3023	chr5LG3	21001680	3		K	K	K	K	K	K	K	K	K	E	K	E	E	K	K	K	K	E	K	K	K	E	E	K	E	E	E	K	E	E	K	K	K	K	K	K	E	K	K	K	E	E	E	K
PsCam038902	7.3023	chr5LG3	21059148	3		K	K	K	K	K	K	K	K	K	E	K	E	E	K	K	K	K	E	K	K	K	E	E	K	E	E	E	K	E	E	K	K	K	K	K	K	E	K	K	K	E	E	E	K
PsCam038204	7.6668	chr5LG3	22130624	3		K	K	K	K	K	K	K	K	K	E	K	E	E	K	K	K	K	E	K	K	K	E	E	K	E	E	E	K	E	E	K	K	K	K	K	K	E	K	K	K	E	E	E	K
PsCam035592	7.7877	scaffold02878	148367	3		K	K	K	K	K	K	K	K	K	E	K	E	E	K	K	K	K	E	K	K	K	E	E	K	E	E	E	K	E	E	K	K	K	K	K	K	E	K	K	K	E	E	E	K
PsCam020329	7.7877	scaffold02878	156492	3		K	K	K	K	K	K	K	K	K	E	K	-	E	K	K	K	K	E	K	K	K	E	E	K	E	E	E	K	E	E	K	K	K	K	K	K	E	K	K	K	E	E	E	K
PsCam052254	7.7877	scaffold02878	189515	3		K	K	K	K	K	K	K	K	K	E	K	-	E	K	K	K	K	E	K	K	K	E	E	K	E	E	E	K	E	E	K	K	K	K	K	K	E	K	K	K	E	E	E	K
PsCam028740	7.7877	scaffold00806	31655	3		K	K	K	K	K	K	K	K	K	E	K	-	E	K	K	K	K	E	K	K	K	E	E	K	E	E	E	K	E	E	K	K	K	K	K	K	E	K	K	K	E	E	E	K
PsCam038305	7.7877	chr5LG3	21811313	3		K	K	K	K	K	K	K	K	K	E	K	-	E	K	K	K	K	E	K	K	K	E	E	K	E	E	E	K	E	E	K	K	K	K	K	K	E	K	K	K	E	E	E	K
PsCam057275	7.9086	chr5LG3	21886207	3		K	K	K	K	K	K	K	K	K	E	K	-	E	K	K	K	K	E	K	K	K	E	E	K	E	E	E	K	E	E	K	K	K	K	K	K	E	K	K	K	E	E	E	K
PsCam042786	7.9086	chr5LG3	24119521	3		K	K	K	K	K	K	K	K	K	E	K	-	E	K	K	K	K	E	K	K	K	E	E	K	E	E	E	K	E	E	K	K	K	K	K	K	E	K	K	K	E	E	E	K
PsCam029182	8.0296	chr5LG3	22490199	3		K	K	K	K	K	K	K	K	K	E	K	-	E	K	K	K	K	E	K	K	K	E	E	K	E	E	E	K	E	E	K	K	K	K	K	K	E	K	K	K	E	E	E	K
PsCam007141	8.0296	chr5LG3	22527838	3		K	K	K	K	K	K	K	K	K	E	K	E	E	K	K	K	K	E	K	K	K	E	E	K	E	E	E	K	E	E	K	K	K	K	K	K	E	K	K	K	E	E	E	K
PsCam001114	8.1511	chr5LG3	22596190	3		K	K	K	K	K	K	K	K	K	E	K	-	E	K	K	K	K	E	K	K	K	E	E	K	E	E	E	K	E	E	K	K	K	K	K	K	E	K	K	K	E	-	E	-
PsCam036683	8.1511	chr5LG3	22616179	3		K	K	K	K	K	K	K	K	K	E	K	-	E	K	K	K	K	E	K	K	K	E	E	K	E	E	E	K	E	E	K	K	K	K	K	K	E	K	K	K	E	K	E	K
PsCam034276	8.6401	chr5LG3	25599793	3		K	K	K	K	K	K	K	K	K	E	K	-	E	K	K	K	K	E	K	K	K	E	E	K	E	E	E	K	E	E	K	K	K	K	K	K	E	K	K	K	E	K	E	K
PsCam035612	8.6401	chr5LG3	25151113	3		K	K	K	K	K	K	K	K	K	E	K	-	E	K	K	K	K	E	K	K	K	E	E	K	E	E	E	K	E	E	K	K	K	K	K	K	E	K	K	K	E	K	E	K
PsCam039464	8.6401	chr5LG3	23306250	3		-	-	-	-	-	-	-	-	-	-	-	-	-	-	-	-	-	-	-	-	-	-	-	-	-	-	-	-	-	-	-	-	-	-	-	-	-	-	-	-	-	-	-	-
PsCam003590	8.6401	chr5LG3	23456038	3		K	K	K	K	K	K	K	K	K	E	K	-	E	K	K	K	K	E	K	K	K	E	E	K	E	E	E	K	E	E	K	K	K	K	K	K	E	K	K	K	E	K	E	K
PsCam038456	8.6401	chr5LG3	24998711	3		-	-	-	-	-	-	-	-	-	-	-	-	-	-	-	-	-	-	-	-	-	-	-	-	-	-	-	-	-	-	-	-	-	-	-	-	-	-	-	-	-	-	-	-
PsCam040317	8.6401	chr5LG3	26145235	3		K	K	K	K	K	K	K	K	K	E	K	-	E	K	K	K	K	E	K	K	K	E	E	K	E	E	E	K	E	E	K	K	K	K	K	K	E	K	K	K	E	K	E	K
PsCam027024	8.6401	scaffold02928	148515	3		-	-	-	-	-	-	-	-	-	-	-	-	-	-	-	-	-	-	-	-	-	-	-	-	-	-	-	-	-	-	-	-	-	-	-	-	-	-	-	-	-	-	-	-
PsCam044261	8.8776	chr5LG3	27366604	3		K	K	K	K	K	K	K	E	K	E	K	E	E	K	K	K	K	E	K	K	K	E	E	K	E	E	E	K	E	E	K	K	K	K	K	K	E	K	K	K	E	K	E	K
PsCam044036	8.8776	chr5LG3	27376807	3		K	K	K	K	K	K	K	E	K	E	K	E	E	K	K	K	K	E	K	K	K	E	E	K	E	E	E	K	E	E	K	K	K	K	K	K	E	K	K	K	E	K	E	K
PsCam045380	8.8776	chr5LG3	27494494	3		K	K	K	K	K	K	K	E	K	E	K	E	E	K	K	K	K	E	K	K	K	E	E	K	E	E	E	K	E	E	K	K	K	K	K	K	E	K	K	K	E	K	E	K
PsCam004010	8.8776	chr5LG3	28139275	3		K	K	K	K	K	K	K	E	K	E	K	-	E	K	K	K	K	E	K	K	K	E	E	K	E	E	E	K	E	E	K	K	K	K	K	K	E	K	K	K	E	K	E	K
PsCam013421	8.8776	chr5LG3	28337169	3		K	K	K	K	K	K	K	E	K	E	K	-	E	K	K	K	K	E	K	K	K	E	E	K	E	E	E	K	E	E	K	K	K	K	K	K	E	K	K	K	E	K	E	K
PsCam037597	9.1203	chr5LG3	28899416	3		K	K	K	K	K	K	K	E	K	E	K	-	E	K	K	K	K	E	K	K	K	E	E	K	E	E	E	K	K	E	K	K	K	K	K	K	E	K	K	K	E	K	E	K
PsCam053932	9.2412	chr5LG3	30838946	3		K	K	K	K	K	K	K	E	K	E	K	E	E	K	K	K	K	E	K	K	K	E	E	K	E	E	E	K	K	E	K	K	K	K	K	K	E	K	K	K	E	K	E	K
PsCam017210	9.2412	chr5LG3	30844591	3		K	K	K	K	K	K	K	E	K	E	K	-	E	K	K	K	K	E	K	K	K	E	E	K	E	E	E	K	K	E	K	K	K	K	K	K	E	K	K	K	E	K	E	K
PsCam013963	9.2412	chr5LG3	30848692	3		K	K	K	K	K	K	K	E	K	E	K	E	E	K	K	K	K	E	K	K	K	E	E	K	E	E	E	K	K	E	K	K	K	K	K	K	E	K	K	K	E	K	E	K
PsCam048157	10.5201	chr5LG3	20643109	3		K	K	K	K	K	K	K	E	K	E	K	-	E	K	K	K	K	E	K	K	K	E	E	K	E	E	E	K	K	K	K	K	K	K	K	K	E	K	K	K	E	K	E	K
PsCam040305	10.5201	chr5LG3	32224696	3		K	K	K	K	K	K	K	E	K	E	K	E	E	K	K	K	K	E	K	K	K	E	E	K	E	E	E	K	K	K	K	K	K	K	K	K	E	K	K	K	E	K	E	K
PsCam008421	10.5201	chr5LG3	32237138	3		K	K	K	K	K	K	K	E	K	E	K	-	E	K	K	K	K	E	K	K	K	E	E	K	E	E	E	K	K	K	K	K	K	K	K	K	E	K	K	K	E	K	E	K
PsCam009613	10.5201	chr5LG3	32794689	3		K	K	K	K	K	K	K	E	K	E	K	E	E	K	K	K	K	E	K	K	K	E	E	K	E	E	E	K	K	K	K	K	K	K	K	K	E	K	K	K	E	K	E	K
PsCam050231	10.5201	chr5LG3	32866991	3		K	K	K	K	K	K	K	E	K	E	K	E	E	K	K	K	K	E	K	K	K	E	E	K	E	E	E	K	K	K	K	K	K	K	K	K	E	K	K	K	E	K	E	K
PsCam037306	10.6446	scaffold03731	24675	3		K	K	K	K	K	K	K	E	K	E	K	K	E	K	K	K	K	E	K	K	K	E	E	K	E	E	E	K	K	K	K	K	K	K	K	K	E	K	K	K	E	K	E	K
PsCam045318	10.7698	chr5LG3	36222194	3		K	K	K	K	K	K	K	E	K	E	K	K	E	K	K	K	K	E	K	K	K	E	E	K	E	E	E	K	K	K	K	K	K	K	K	K	E	K	K	K	E	K	E	K
PsCam050507	10.7698	chr5LG3	33487661	3		K	K	K	K	K	K	K	E	K	E	K	K	E	K	K	K	K	E	K	K	K	E	E	K	E	E	E	K	K	K	K	K	K	K	K	K	E	K	K	K	E	K	E	K
PsCam003135	10.8949	chr5LG3	33665877	3		K	K	K	K	K	K	K	E	K	E	K	K	E	K	K	K	K	E	K	K	K	E	E	K	E	E	E	K	K	K	K	K	K	K	K	K	E	K	K	K	E	K	E	E
PsCam049111	10.8949	chr5LG3	36317290	3		K	K	K	K	K	K	K	E	K	E	K	K	E	K	K	K	K	E	K	K	K	E	E	K	E	E	E	K	K	K	K	K	K	K	K	K	E	K	K	K	E	K	E	E
PsCam039219	10.8949	chr5LG3	33245906	3		K	K	K	K	K	K	K	E	K	E	-	K	E	K	K	K	K	E	K	K	K	E	E	K	E	E	E	K	K	K	K	K	K	K	K	K	E	K	K	K	E	K	E	E
PsCam036865	11.0246	chr5LG3	35668272	3		K	K	K	K	K	K	K	E	K	E	K	K	E	K	K	K	K	E	K	K	K	E	E	K	E	E	E	K	K	K	K	K	K	K	K	K	E	K	K	K	E	K	E	E
PsCam004764	11.2837	chr5LG3	35816089	3		K	K	K	K	K	K	K	E	K	E	K	K	E	K	K	K	K	E	K	K	K	E	E	K	E	E	E	K	K	K	K	K	K	K	K	K	E	K	K	K	E	K	E	-
PsCam045305	11.2837	chr5LG3	36061534	3		K	K	K	K	K	K	K	E	K	E	K	K	E	K	K	K	K	E	K	K	K	E	E	K	E	E	E	K	K	K	K	K	K	K	K	K	E	K	K	K	E	K	E	E
PsCam003438	11.2837	chr5LG3	36062829	3		K	K	K	K	K	K	K	E	K	E	K	K	E	K	K	K	K	E	K	K	K	E	E	K	E	E	E	K	K	K	K	K	K	K	K	K	E	K	K	K	E	K	E	E
PsCam036471	11.2837	chr5LG3	36154229	3		K	K	K	K	K	K	K	E	K	E	K	K	E	K	K	K	K	E	K	K	K	E	E	K	E	E	E	K	K	K	K	K	K	K	K	K	E	K	K	K	E	K	E	E
PsCam001938	11.2837	chr5LG3	36001415	3		K	K	K	K	K	K	K	E	K	E	K	K	E	K	K	K	K	E	K	K	K	E	E	K	E	E	E	K	K	K	K	K	K	K	K	K	E	K	K	K	E	K	E	E
PsCam036018	11.5343	chr5LG3	33957336	3		K	K	K	K	K	K	K	E	K	E	K	-	E	K	K	K	K	E	K	K	K	E	E	K	E	E	E	K	K	K	K	K	K	K	K	K	E	K	K	K	E	K	E	E
PsCam014015	11.5343	chr5LG3	34479171	3		K	K	K	K	K	K	K	E	K	E	K	E	E	K	K	K	K	E	K	K	K	E	E	K	E	E	E	K	K	K	K	K	K	K	K	K	E	K	K	K	E	K	E	E
PsCam043520	11.5343	chr5LG3	34524529	3		K	K	K	K	K	K	K	E	K	E	K	-	E	K	K	K	K	E	K	K	K	E	E	K	E	E	E	K	K	K	K	K	K	K	K	K	E	K	K	K	E	K	E	E
PsCam030905	11.6592	chr5LG3	35143197	3		K	K	K	K	K	K	K	E	K	E	K	E	E	K	K	K	K	E	K	K	K	E	E	K	E	E	E	K	K	K	K	K	K	K	K	K	E	K	K	K	E	K	E	E
PsCam014258	11.784	chr5LG3	36775526	3		K	K	K	K	K	K	K	E	K	E	K	-	E	K	K	K	K	E	K	K	K	E	E	K	E	E	E	K	K	K	K	K	K	K	K	K	E	K	K	K	E	K	E	E
PsCam042487	11.784	chr5LG3	167008471	3		K	K	K	K	K	K	K	E	K	E	K	-	E	K	K	K	K	E	K	K	K	E	E	K	E	E	E	K	K	K	K	K	K	K	K	K	E	K	K	K	E	K	E	E
PsCam042889	12.1803	chr5LG3	167267829	3		K	K	K	K	K	K	K	E	K	E	K	-	E	K	K	K	K	E	K	K	K	E	E	K	E	E	E	K	K	K	K	K	K	K	K	K	E	K	K	K	E	K	E	E
PsCam036042	12.4435	chr5LG3	37325968	3		K	K	K	K	K	K	K	E	K	E	K	-	E	K	K	K	K	E	K	E	K	E	E	K	E	E	E	K	K	K	K	K	K	K	K	K	E	K	K	K	E	K	E	E
PsCam028316	12.4435	chr5LG3	37647302	3		K	K	K	K	K	K	K	E	K	E	K	-	E	K	K	K	K	E	K	E	K	E	E	K	E	E	E	K	K	K	K	K	K	K	K	K	E	K	K	K	E	K	E	E
PsCam046751	12.4435	chr5LG3	37646786	3		K	K	K	K	K	K	K	E	K	E	K	-	E	K	K	K	K	E	K	E	K	E	E	K	E	E	E	K	K	K	K	K	K	K	K	K	E	K	K	K	E	K	E	E
PsCam055880	12.4435	chr5LG3	37613810	3		K	K	K	K	K	K	K	E	K	E	K	E	E	K	K	K	K	E	K	E	K	E	E	K	E	E	E	K	K	K	K	K	K	K	K	K	E	K	K	K	E	K	E	E
PsCam037887	12.8208	chr5LG3	38672200	3		K	K	K	K	K	K	K	E	K	E	K	E	E	K	K	K	K	E	K	E	K	E	E	K	E	E	E	K	K	K	K	K	K	K	K	K	E	K	K	K	E	K	E	E
PsCam050015	13.0715	chr5LG3	38436070	3		K	K	K	K	K	K	K	E	K	E	K	-	E	K	K	K	K	E	K	E	K	E	E	K	E	E	E	K	K	K	K	K	K	K	K	K	E	K	K	K	E	K	E	E
PsCam043635	13.7052	chr5LG3	38413730	3		K	K	K	K	K	K	K	E	K	E	K	-	E	K	K	K	K	E	K	E	K	E	E	K	E	E	E	K	K	K	K	K	K	K	K	K	E	K	K	K	E	K	E	E
PsCam011754	13.7052	chr5LG3	39888915	3		K	K	K	K	K	K	K	E	K	E	K	-	E	K	K	K	K	E	K	E	K	E	E	K	E	E	E	K	K	K	K	K	K	K	K	K	E	K	K	K	E	K	E	E
PsCam042229	13.7052	chr5LG3	39993638	3		K	K	K	K	K	K	K	E	K	E	K	-	E	K	K	K	K	E	K	E	K	E	E	K	E	E	E	K	K	K	K	K	K	K	K	K	E	K	K	K	E	K	E	E
PsCam056334	14.2102	scaffold03655	21729	3		K	K	K	K	K	K	K	E	K	E	K	-	E	K	K	K	K	E	K	E	K	E	E	K	E	E	E	K	K	K	K	K	K	K	K	K	E	K	K	K	E	K	E	E
PsCam034414	14.2102	chr5LG3	38993070	3		K	K	K	K	K	K	K	E	K	E	K	-	E	K	K	K	K	E	K	E	K	E	E	K	E	E	E	K	K	K	K	K	K	K	K	K	E	K	K	K	E	K	E	E
PsCam023503	14.4609	chr5LG3	40391632	3		K	K	K	K	K	K	K	E	K	E	K	E	E	K	K	K	K	E	K	E	K	E	E	K	E	E	E	K	K	K	K	K	K	K	K	K	E	K	K	K	E	K	E	E
PsCam059663	14.7128	chr5LG3	39433193	3		K	K	K	K	K	K	K	E	K	E	K	-	E	K	K	K	K	E	K	E	K	E	E	K	E	E	E	K	K	K	K	K	K	K	K	K	E	K	K	K	E	K	E	E
PsCam000221	14.7128	chr5LG3	39507275	3		K	K	K	K	K	K	K	E	K	E	K	-	E	K	K	K	K	E	K	E	K	E	E	K	E	E	E	K	K	K	K	K	K	K	K	K	E	K	K	K	E	K	E	E
PsCam043308	14.7128	scaffold01928	201456	3		K	K	K	K	K	K	K	E	K	E	K	-	E	K	K	K	K	E	K	E	K	E	E	K	E	E	E	K	K	K	K	K	K	K	K	K	E	K	K	K	E	K	E	E
PsCam011043	14.9634	chr5LG3	40609262	3		K	K	K	K	K	K	K	E	K	E	K	-	E	K	K	K	K	E	K	E	K	E	E	K	E	E	E	K	K	K	K	K	K	K	K	K	E	K	K	K	E	K	E	E
PsCam012930	15.4684	chr5LG3	41185541	3		K	K	K	K	K	K	K	E	K	E	K	-	E	K	K	K	K	E	K	E	K	E	E	K	E	E	E	K	K	K	K	K	K	K	K	K	E	K	K	K	E	K	E	E
PsCam058095	15.7191	chr5LG3	41259641	3		K	K	K	K	K	K	K	E	K	E	K	E	E	K	K	K	K	E	K	E	K	E	E	K	E	E	E	K	K	K	K	K	K	K	K	K	E	K	K	K	E	K	E	E
PsCam037820	15.7191	chr5LG3	41322174	3		K	K	K	K	K	K	K	E	K	E	K	E	E	K	K	K	K	E	K	E	K	E	E	K	E	E	E	K	K	K	K	K	K	K	K	K	E	K	K	K	E	K	E	E
PsCam034019	15.8439	chr5LG3	42983264	3		K	K	K	K	K	K	K	E	K	E	K	-	E	K	K	K	K	E	K	E	K	E	E	K	E	E	E	K	K	K	K	K	K	K	K	K	E	K	K	K	E	K	E	E
PsCam014050	16.0945	chr5LG3	44497839	3		K	K	K	K	K	K	K	E	K	E	K	-	E	K	K	K	K	E	K	E	K	E	E	K	E	E	E	K	K	K	K	K	K	K	K	K	E	K	K	K	E	K	E	E
PsCam014724	16.2194	chr5LG3	44996577	3		K	K	K	K	K	K	K	E	K	E	K	E	E	K	K	K	K	E	K	E	K	E	E	K	E	E	E	K	K	K	K	K	K	K	K	K	E	K	K	K	E	K	E	E
PsCam008311	16.47	chr5LG3	45063727	3		K	K	K	K	K	K	K	E	K	E	K	E	E	K	K	K	K	E	K	E	K	E	E	K	E	E	E	K	K	K	K	K	K	K	K	K	E	K	K	K	E	K	E	E
PsCam036728	16.47	chr5LG3	45067638	3		K	K	K	K	K	K	K	E	K	E	K	-	E	K	K	K	K	E	K	E	K	E	E	K	E	E	E	K	K	K	K	K	K	K	K	K	E	K	K	K	E	K	E	E
PsCam006665	19.0141	chr5LG3	47023014	3		K	K	K	K	K	K	K	E	K	E	K	-	E	K	K	K	K	E	K	E	K	E	E	K	E	E	E	K	K	K	K	K	K	K	K	K	E	K	K	K	E	K	E	E
PsCam005638	19.0141	chr5LG3	47042519	3		K	K	K	K	K	K	K	E	K	E	K	-	E	K	K	K	K	E	K	E	K	E	E	K	E	E	E	K	K	K	K	K	K	K	K	K	E	K	K	K	E	K	E	E
PsCam057447	19.0141	chr5LG3	46367933	3		K	K	K	K	K	K	K	E	K	E	K	-	E	K	K	K	K	E	K	E	K	E	E	K	E	E	E	K	K	K	K	K	K	K	K	K	E	K	K	K	E	K	E	E
PsCam053082	19.0141	chr5LG3	47602063	3		K	K	K	K	K	K	K	E	K	E	K	-	E	K	K	K	K	E	K	E	K	E	E	K	E	E	E	K	K	K	K	K	K	K	K	K	E	K	K	K	E	K	E	E
PsCam011208	19.3914	chr5LG3	47971651	3		K	K	K	K	K	K	K	E	K	E	K	-	E	K	K	K	K	E	K	E	K	E	E	K	E	E	E	K	K	K	K	K	K	K	K	K	E	K	K	K	E	K	E	E
PsCam029269	19.3914	chr5LG3	47969438	3		K	K	K	K	K	K	K	E	K	E	K	E	E	K	K	K	K	E	K	E	K	E	E	K	E	E	E	K	K	K	K	K	K	K	K	K	E	K	K	K	E	K	E	E
PsCam047438	19.3914	chr5LG3	48519105	3		K	K	K	K	K	K	K	E	K	E	K	-	E	K	K	K	K	E	K	E	K	E	E	K	E	E	E	K	K	K	K	K	K	K	K	K	E	K	K	K	E	K	E	E
PsCam055970	19.8965	chr5LG3	48320578	3		K	K	K	K	K	K	K	E	K	E	K	-	E	K	K	K	K	E	K	E	K	E	E	K	E	E	E	K	K	K	K	K	K	K	K	K	E	K	K	K	E	K	E	E
PsCam006740	20.2738	chr5LG3	47058351	3		K	K	K	K	K	K	K	E	K	E	K	E	K	K	K	K	K	E	K	E	K	E	E	K	E	E	E	K	K	K	K	K	K	K	K	K	E	K	K	K	E	K	E	E
PsCam002579	20.2738	chr5LG3	50732998	3		K	K	K	K	K	K	K	E	K	E	K	-	K	K	K	K	K	E	K	E	K	E	E	K	E	E	E	K	K	K	K	K	K	K	K	K	E	K	K	K	E	K	E	E
PsCam001059	20.3987	chr5LG3	50697945	3		K	K	K	K	K	K	K	E	K	E	K	-	K	K	K	K	K	E	K	E	K	E	E	K	E	E	E	K	K	K	K	K	K	K	K	K	E	K	K	K	E	K	E	E
PsCam037131	20.3987	chr5LG3	50661319	3		K	K	K	K	K	K	K	E	K	E	K	E	K	K	K	K	K	E	K	E	K	E	E	K	E	E	E	K	K	K	K	K	K	K	K	K	E	K	K	K	E	K	E	E
PsCam042985	20.3987	scaffold01782	100444	3		K	K	K	K	K	K	K	E	K	E	K	-	K	K	K	K	K	E	K	E	K	E	E	K	E	E	E	K	K	K	K	K	K	K	K	K	E	K	K	K	E	K	E	E
PsCam022292	20.6493	chr5LG3	50929587	3		K	K	K	K	K	K	K	E	K	E	K	-	K	K	K	K	K	E	K	E	K	E	E	K	E	E	E	K	K	K	K	K	K	K	K	K	E	K	K	K	E	K	E	E
PsCam048408	20.6493	chr5LG3	50250726	3		K	K	K	K	K	K	K	E	K	E	K	-	K	K	K	K	K	E	K	E	K	E	E	K	E	E	E	K	K	K	K	K	K	K	K	K	E	K	K	K	E	K	E	E
PsCam016876	20.6493	chr5LG3	50254048	3		K	K	K	K	K	K	K	E	K	E	K	E	K	K	K	K	K	E	K	E	K	E	E	K	E	E	E	K	K	K	K	K	K	K	K	K	E	K	K	K	E	K	E	E
PsCam056487	20.6493	chr5LG3	50261880	3		K	K	K	K	K	K	K	E	K	E	K	E	K	K	K	K	K	E	K	E	K	E	E	K	E	E	E	K	K	K	K	K	K	K	K	K	E	K	K	K	E	K	E	E
PsCam049089	45.1805	chr5LG3	92240789	3		K	K	K	K	K	E	K	E	K	E	K	E	E	E	K	E	K	K	K	E	K	K	E	K	E	E	E	K	K	K	K	K	K	K	K	K	K	E	E	K	E	E	E	E
PsCam012167	45.1805	chr5LG3	93013156	3		K	K	K	K	K	E	K	E	K	E	K	E	E	E	K	E	K	K	K	E	K	K	E	K	E	E	E	K	K	K	K	K	K	K	K	K	K	E	E	K	E	E	E	E
PsCam040542	45.1805	chr5LG3	93533704	3		K	K	K	K	K	E	K	E	K	E	K	E	E	E	K	E	K	K	K	E	K	K	E	K	E	E	E	K	K	K	K	K	K	K	K	K	K	E	E	K	E	E	E	E
PsCam048186	45.1805	chr5LG3	93693079	3		K	K	K	K	K	E	K	E	K	E	K	E	E	E	K	E	K	K	K	E	K	K	E	K	E	E	E	K	K	K	K	K	K	K	K	K	K	E	E	K	E	E	E	E
PsCam052477	45.3011	chr5LG3	94786921	3		K	K	K	K	K	E	K	E	K	E	K	E	E	E	K	E	K	K	K	E	K	K	E	K	E	E	E	K	K	K	K	E	K	K	K	K	K	E	E	K	E	E	E	E
PsCam045470	45.3011	chr5LG3	94848060	3		K	K	K	K	K	E	K	E	K	E	K	E	E	E	K	E	K	K	K	E	K	K	E	K	E	E	E	K	K	K	K	E	K	K	K	K	K	E	E	K	E	E	E	E
PsCam029267	45.3011	chr5LG3	94951502	3		K	K	K	K	K	E	K	E	K	E	K	E	E	E	K	E	K	K	K	E	K	K	E	K	E	E	E	K	K	K	K	E	K	K	K	K	K	E	E	K	E	E	E	E
PsCam046016	45.4217	chr5LG3	94995431	3		K	K	K	K	K	E	K	E	K	E	K	E	E	E	K	E	K	K	K	E	K	K	E	E	E	E	E	K	K	K	K	E	K	K	K	K	K	E	E	K	E	E	E	E
PsCam038340	45.4217	chr5LG3	95134243	3		K	K	K	K	K	E	K	E	K	E	K	E	E	E	K	E	K	K	K	E	K	K	E	E	E	E	E	K	K	K	K	E	K	K	K	K	K	E	E	K	E	E	E	E
PsCam047003	45.4217	chr5LG3	95312027	3		K	K	K	K	K	E	K	E	K	E	K	E	E	E	K	E	K	K	K	E	K	K	E	E	E	E	E	K	K	K	K	E	K	K	K	K	K	E	E	K	E	E	E	E
PsCam016767	45.4217	chr5LG3	95486959	3		K	K	K	K	K	E	K	E	K	E	K	E	E	E	K	E	K	K	K	E	K	K	E	E	E	E	E	K	K	K	K	E	K	K	K	K	K	E	E	K	E	E	E	E
PsCam033748	45.4217	chr5LG3	95685958	3		K	K	K	K	K	E	K	E	K	E	K	E	E	E	K	E	K	K	K	E	K	K	E	E	E	E	E	K	K	K	K	E	K	K	K	K	K	E	E	K	E	E	E	E
PsCam050958	45.9095	chr5LG3	96099224	3		K	K	K	K	K	E	K	E	K	E	K	E	E	E	K	E	K	K	K	E	K	K	E	E	E	E	E	K	K	K	K	E	K	K	K	K	K	E	E	K	E	E	E	E
PsCam048615	45.9095	chr5LG3	96798570	3		K	K	K	K	K	E	K	E	K	E	K	E	E	E	K	E	K	K	K	E	K	K	E	E	E	E	E	K	K	K	K	E	K	K	K	K	K	E	E	K	E	E	E	E
PsCam034552	45.9095	chr5LG3	96849816	3		K	K	K	K	K	E	K	E	K	E	K	E	E	E	K	E	K	K	K	E	K	K	E	E	E	E	E	K	K	K	K	E	K	K	K	K	K	E	E	K	E	E	E	E
PsCam036583	45.9095	chr5LG3	97352626	3		K	K	K	K	K	E	K	E	K	E	-	E	E	E	K	E	K	K	K	E	K	K	E	E	E	E	E	K	K	K	K	E	K	K	K	K	K	E	E	K	E	E	E	E
PsCam030794	45.9095	chr5LG3	97419201	3		K	K	K	K	K	E	K	E	K	E	K	E	E	E	K	E	K	K	K	E	K	K	E	E	E	E	E	K	K	K	K	E	K	K	K	K	K	E	E	K	E	E	E	E
PsCam030499	46.0301	chr5LG3	97520558	3		K	K	K	K	K	E	K	E	K	E	K	E	E	E	K	E	K	K	K	E	K	K	E	E	E	E	E	K	K	K	K	E	K	K	K	K	K	E	E	K	E	E	E	E
PsCam044334	46.3947	chr5LG3	98288604	3		K	K	K	K	K	E	K	E	K	E	K	E	E	E	K	E	K	K	K	E	K	K	E	E	E	E	E	E	K	K	K	E	K	K	K	K	K	E	E	K	E	E	E	E
PsCam034080	46.5153	chr5LG3	98342044	3		K	K	K	K	K	E	K	E	K	E	K	E	E	E	K	E	K	K	K	E	K	K	E	E	E	E	E	E	K	K	K	E	K	K	K	K	K	E	E	K	E	E	E	E
PsCam036032	46.5153	chr5LG3	98351617	3		K	K	K	K	K	E	K	E	K	E	K	E	E	E	K	E	K	K	K	E	K	K	E	E	E	E	E	E	K	K	K	E	K	K	K	K	K	E	E	K	E	E	E	E
PsCam044930	46.5153	chr5LG3	98411072	3		K	K	K	K	K	E	K	E	K	E	K	E	E	E	K	E	K	K	K	E	K	K	E	E	E	E	E	E	K	K	K	E	K	K	K	K	K	E	E	K	E	E	E	E
PsCam036311	46.5153	chr5LG3	98413427	3		K	K	K	K	K	E	K	E	K	E	K	E	E	E	K	E	K	K	K	E	K	K	E	E	E	E	E	E	K	K	K	E	K	K	K	K	K	E	E	K	E	E	E	E
PsCam036739	46.5153	chr5LG3	98475540	3		K	K	K	K	K	E	K	E	K	E	K	E	E	E	K	E	K	K	K	E	K	K	E	E	E	E	E	E	K	K	K	E	K	K	K	K	K	E	E	K	E	E	E	E
PsCam058833	46.5153	chr5LG3	98594952	3		K	K	K	K	K	E	K	E	K	E	K	E	E	E	K	E	K	K	K	E	K	K	E	E	E	E	E	E	K	K	K	E	K	K	K	K	K	E	E	K	E	E	E	E
PsCam048832	46.5153	chr5LG3	99414156	3		K	K	K	K	K	E	K	E	K	E	K	E	E	E	K	E	K	K	K	E	K	K	E	E	E	E	E	E	K	K	K	E	K	K	K	K	K	E	E	K	E	E	E	E
PsCam045575	46.6359	chr5LG3	99106453	3		K	K	K	K	K	E	K	E	K	E	K	E	E	E	K	E	K	K	K	E	K	K	E	E	E	E	E	E	K	K	K	E	K	K	K	K	K	E	E	K	E	E	E	E
PsCam056640	46.7566	chr5LG3	102102648	3		K	K	K	K	K	E	K	E	K	E	K	E	E	E	K	E	K	K	K	E	K	K	E	E	E	E	E	E	K	K	K	E	K	K	K	K	K	E	E	K	E	E	E	E
PsCam036412	46.9987	chr5LG3	102079465	3		K	K	K	K	K	E	K	E	K	E	K	E	E	E	K	E	K	K	K	E	K	K	E	E	E	E	E	E	K	K	K	E	K	K	K	K	K	E	E	K	E	E	E	E
PsCam029517	47.1193	chr5LG3	102333311	3		K	K	K	K	K	E	K	E	K	E	K	E	E	E	K	E	K	K	K	E	K	K	E	E	E	E	E	E	K	K	K	E	K	K	K	K	K	E	E	K	E	E	E	E
PsCam033289	47.1193	chr5LG3	102331443	3		K	K	K	K	K	E	K	E	K	E	K	E	E	E	K	E	K	K	K	E	K	K	E	E	E	E	E	E	K	K	K	E	K	K	K	K	K	E	E	K	E	E	E	E
PsCam049636	47.1193	chr5LG3	102448046	3		K	K	K	K	K	E	K	E	K	E	K	E	E	E	K	E	K	K	K	E	K	K	E	E	E	E	E	E	K	K	K	E	K	K	K	K	K	E	E	K	E	E	E	E
PsCam042403	47.1193	chr5LG3	104340999	3		K	K	K	K	K	E	K	E	K	E	K	E	E	E	K	E	K	K	K	E	K	K	E	E	E	E	E	E	K	K	K	E	K	K	K	K	K	E	E	K	E	E	E	E
PsCam011958	47.1193	chr5LG3	104349817	3		K	K	K	K	K	E	K	E	K	E	K	E	E	E	K	E	K	K	K	E	K	K	E	E	E	E	E	E	K	K	K	E	K	K	K	K	K	E	E	K	E	E	E	E
PsCam045156	47.1193	chr5LG3	87359515	3		K	K	K	K	K	E	K	E	K	E	K	E	E	E	K	E	K	K	K	E	K	K	E	E	E	E	E	E	K	K	K	E	K	K	K	K	K	E	E	K	E	E	E	E
PsCam053938	47.1193	chr5LG3	103211814	3		K	K	K	K	K	E	K	E	K	E	K	E	E	E	K	E	K	K	K	E	K	K	E	E	E	E	E	E	K	K	K	E	K	K	K	K	K	E	E	K	E	E	E	E
PsCam036496	47.3614	chr5LG3	104672321	3		K	K	K	K	K	E	K	E	K	E	E	E	E	E	K	E	K	K	K	E	K	K	E	E	E	E	E	E	K	K	K	E	K	K	K	K	K	E	E	K	E	E	E	E
PsCam050549	47.3614	chr5LG3	104801582	3		K	K	K	K	K	E	K	E	K	E	E	E	E	E	K	E	K	K	K	E	K	K	E	E	E	E	E	E	K	K	K	E	K	K	K	K	K	E	E	K	E	E	E	E
PsCam037057	47.4824	chr5LG3	104817368	3		K	K	K	K	K	E	K	E	K	E	E	E	E	E	K	E	K	K	K	E	K	K	E	E	E	E	E	E	K	K	K	E	K	K	K	K	K	E	E	K	E	E	E	E
PsCam059306	47.4824	chr5LG3	104832529	3		K	K	K	K	K	E	K	E	K	E	E	E	E	E	K	E	K	K	K	E	K	K	E	E	E	E	E	E	K	K	K	E	K	K	K	K	K	E	E	K	E	E	E	E
PsCam023065	47.4824	chr5LG3	105210003	3		K	K	K	K	K	E	K	E	K	E	E	E	E	E	K	E	K	K	K	E	K	K	E	E	E	E	E	E	K	K	K	E	K	K	K	K	K	E	E	K	E	E	E	E
PsCam038764	47.4824	chr5LG3	105393579	3		K	K	K	K	K	E	K	E	K	E	E	E	E	E	K	E	K	K	K	E	K	K	E	E	E	E	E	E	K	K	K	E	K	K	K	K	K	E	E	K	E	E	E	E
PsCam039622	47.4824	chr5LG3	105469962	3		K	K	K	K	K	E	K	E	K	E	E	E	E	E	K	E	K	K	K	E	K	K	E	E	E	E	E	E	K	K	K	E	K	K	K	K	K	E	E	K	E	E	E	E
PsCam045990	47.4824	chr5LG3	105473222	3		K	K	K	K	K	E	K	E	K	E	E	E	E	E	K	E	K	K	K	E	K	K	E	E	E	E	E	E	K	K	K	E	K	K	K	K	K	E	E	K	E	E	E	E
PsCam003403	47.4824	chr5LG3	109291900	3		K	K	K	K	K	E	K	E	K	E	E	E	E	E	K	E	K	K	K	E	K	K	E	E	E	E	E	E	K	K	K	E	K	K	K	K	K	E	E	K	E	E	E	E
PsCam043222	47.603	chr5LG3	107226067	3		K	K	K	K	K	E	K	E	K	E	E	E	E	E	K	E	K	K	K	E	K	K	E	E	E	E	E	E	K	K	K	E	K	K	K	K	K	E	E	K	E	E	E	E
PsCam035385	47.603	chr5LG3	107407392	3		K	K	K	K	K	E	K	E	K	E	E	E	E	E	K	E	K	K	K	E	K	K	E	E	E	E	E	E	K	K	K	E	K	K	K	K	K	E	E	K	E	E	E	E
PsCam048317	47.603	chr5LG3	106894904	3		K	K	K	K	K	E	K	E	K	E	E	E	E	E	K	E	K	K	K	E	K	K	E	E	E	E	E	E	K	K	K	E	K	K	K	K	K	E	E	K	E	E	E	E
PsCam004249	47.603	chr5LG3	106896940	3		K	K	K	K	K	E	K	E	K	E	E	E	E	E	K	E	K	K	K	E	K	K	E	E	E	E	E	E	K	K	K	E	K	K	K	K	K	E	E	K	E	E	E	E
PsCam009229	47.603	chr5LG3	106908092	3		K	K	K	K	K	E	K	E	K	E	E	E	E	E	K	E	K	K	K	E	K	K	E	E	E	E	E	E	K	K	K	E	K	K	K	K	K	E	E	K	E	E	E	E
PsCam038771	47.603	chr5LG3	106920801	3		K	K	K	K	K	E	K	E	K	E	E	E	E	E	K	E	K	K	K	E	K	K	E	E	E	E	E	E	K	K	K	E	K	K	K	K	K	E	E	K	E	E	E	E
PsCam048115	47.603	chr5LG3	107006798	3		K	K	K	K	K	E	K	E	K	E	E	E	E	E	K	E	K	K	K	E	K	K	E	E	E	E	E	E	K	K	K	E	K	K	K	K	K	E	E	K	E	E	E	E
PsCam042665	47.8451	chr5LG3	107133195	3		K	K	K	K	K	E	K	E	E	E	E	E	E	E	K	E	K	K	K	E	K	K	E	E	E	E	E	E	K	K	K	E	K	K	K	K	K	E	E	K	E	E	E	E
PsCam039677	47.9657	chr5LG3	568942687	3		K	K	K	K	K	E	K	E	E	E	E	E	E	E	K	E	K	K	K	E	K	K	E	E	E	E	E	E	K	K	K	E	K	K	K	K	K	E	E	K	E	E	E	E
PsCam034447	47.9657	chr5LG3	107763369	3		K	K	K	K	K	E	K	E	E	E	E	E	E	E	K	E	K	K	K	E	K	K	E	E	E	E	E	E	K	K	K	E	K	K	K	K	K	E	E	K	E	E	E	E
PsCam049915	48.0864	chr5LG3	107747536	3		K	K	K	K	K	E	K	E	E	E	E	E	E	E	K	E	K	K	K	E	K	K	E	E	E	E	E	E	K	K	K	E	K	K	K	K	K	E	E	K	E	E	E	E
PsCam041066	48.0864	chr5LG3	107735864	3		K	K	K	K	K	E	K	E	E	E	E	E	E	E	K	E	K	K	K	E	K	K	E	E	E	E	E	E	K	K	K	E	K	K	K	K	K	E	E	K	E	E	E	E
PsCam012934	48.207	chr5LG3	109129192	3		K	K	K	K	K	E	K	E	E	E	E	E	E	E	K	E	K	K	K	E	K	K	E	E	E	E	E	E	K	K	K	E	K	K	K	K	K	E	E	K	E	E	E	E
PsCam039482	48.207	chr5LG3	109098707	3		K	K	K	K	K	E	K	E	E	E	E	E	E	E	K	E	K	K	K	E	K	K	E	E	E	E	E	E	K	K	K	E	K	K	K	K	K	E	E	K	E	E	E	E
PsCam000535	48.207	chr5LG3	109036454	3		K	K	K	K	K	E	K	E	E	E	E	E	E	E	K	E	K	K	K	E	K	K	E	E	E	E	E	E	K	K	K	E	K	K	K	K	K	E	E	K	E	E	E	E
PsCam043491	48.207	chr5LG3	108197782	3		K	K	K	K	K	E	K	E	E	E	E	E	E	E	K	E	K	K	K	E	K	K	E	E	E	E	E	E	K	K	K	E	K	K	K	K	K	E	E	K	E	E	E	-
PsCam037090	48.207	chr5LG3	108202151	3		K	K	K	K	K	E	K	E	E	E	E	E	E	E	K	E	K	K	K	E	K	K	E	E	E	E	E	E	K	K	K	E	K	K	K	K	K	E	E	K	E	E	E	E
PsCam004345	48.207	chr5LG3	108204482	3		K	K	K	K	K	E	K	E	E	E	E	E	E	-	K	E	K	K	K	-	K	K	E	E	E	E	E	E	K	K	K	E	K	K	K	K	K	E	E	K	E	E	E	E
PsCam034500	48.207	chr5LG3	108304363	3		K	K	K	K	K	E	K	E	E	E	E	E	E	E	K	E	K	K	K	E	K	K	E	E	E	E	E	E	K	K	K	E	K	K	K	K	K	E	E	K	E	E	E	E
PsCam032493	48.207	chr5LG3	110703401	3		K	K	K	K	K	E	K	E	E	E	E	E	E	E	K	E	K	K	K	E	K	K	E	E	E	E	E	E	K	K	K	E	K	K	K	K	K	E	E	K	E	E	E	E
PsCam034486	48.207	chr5LG3	111215525	3		K	K	K	K	K	E	K	E	E	E	E	E	E	E	K	E	K	K	K	E	K	K	E	E	E	E	E	E	K	K	K	E	K	K	K	K	K	E	E	K	E	E	E	E
PsCam035333	48.207	chr5LG3	111232305	3		K	K	K	K	K	E	K	E	E	E	E	E	E	E	K	E	K	K	K	E	K	K	E	E	E	E	E	E	K	K	K	E	K	K	K	K	K	E	E	K	E	E	E	E
PsCam042182	48.207	chr5LG3	111235011	3		K	K	K	K	K	E	K	E	E	E	E	E	E	E	K	E	K	K	K	E	K	K	E	E	E	E	E	E	K	K	K	E	K	K	K	K	K	E	E	K	E	E	E	E
PsCam049851	48.207	chr5LG3	111330304	3		K	K	K	K	K	E	K	E	E	E	E	E	E	E	K	E	K	K	K	E	K	K	E	E	E	E	E	E	K	K	K	E	K	K	K	K	K	E	E	K	E	E	E	E
PsCam059372	48.207	chr5LG3	111334117	3		K	K	K	K	K	E	K	E	E	E	E	E	E	E	K	E	K	K	K	E	K	K	E	E	E	E	E	E	K	K	K	E	K	K	K	K	K	E	E	K	E	E	E	E
PsCam029411	48.207	chr5LG3	111821806	3		K	K	K	K	K	E	K	E	E	E	E	E	E	E	K	E	K	K	K	E	K	K	E	E	E	E	E	E	K	K	K	E	K	K	K	K	K	E	E	K	E	E	E	E
PsCam038017	48.207	chr5LG3	111047145	3		K	K	K	K	K	E	K	E	E	E	E	E	E	E	K	E	K	K	K	E	K	K	E	E	E	E	E	E	K	K	K	E	K	K	K	K	K	E	E	K	E	E	E	E
PsCam035434	48.3276	scaffold02140	227081	3		K	K	K	E	K	E	K	E	E	E	E	E	E	E	K	E	K	K	K	E	K	K	E	E	E	E	E	E	K	K	K	E	K	K	K	K	K	E	E	K	E	E	E	E
PsCam035309	48.3276	chr5LG3	112480689	3		K	K	K	E	K	E	K	E	E	E	E	E	E	E	K	E	K	K	K	E	K	K	E	E	E	E	E	E	K	K	K	E	K	K	K	K	K	E	E	K	E	E	E	E
PsCam052035	48.4483	chr5LG3	112279182	3		K	K	K	E	K	E	K	E	E	E	E	E	E	E	K	E	K	K	K	E	K	K	E	E	E	E	E	E	K	K	K	E	K	K	K	K	K	E	E	K	E	E	E	E
PsCam039839	48.5689	chr5LG3	112844264	3		K	K	K	E	K	E	K	E	E	E	E	E	E	E	K	E	K	K	K	E	K	K	E	E	E	E	E	E	K	K	K	E	K	K	K	K	K	E	E	K	E	E	E	E
PsCam037444	48.811	chr5LG3	113747298	3		K	K	K	E	K	E	K	E	E	E	E	E	E	E	K	E	K	K	K	E	K	K	E	E	E	E	E	E	K	K	K	E	K	K	K	K	K	E	E	K	E	E	E	E
PsCam036436	48.9316	chr5LG3	113512247	3		K	K	K	E	K	E	K	E	E	E	E	E	E	E	K	E	K	K	K	E	K	K	E	E	E	E	E	E	K	K	K	E	K	K	K	K	K	E	E	K	E	E	E	E
PsCam051652	48.9316	chr5LG3	113587033	3		K	K	K	E	K	E	K	E	E	E	E	E	E	E	K	E	K	K	K	E	K	K	E	E	E	E	E	E	K	K	K	E	K	K	K	K	K	E	E	K	E	E	E	E
PsCam054037	48.9316	chr5LG3	113599814	3		K	K	K	E	K	E	K	E	E	E	E	E	E	E	K	E	K	K	K	E	K	K	E	E	E	E	E	E	K	K	K	E	K	K	K	K	K	E	E	K	E	E	E	E
PsCam015364	48.9316	chr5LG3	113601905	3		K	K	K	E	K	E	K	E	E	E	E	E	E	E	K	E	K	K	K	E	K	K	E	E	E	E	E	E	K	K	K	E	K	K	K	K	K	E	E	K	E	E	E	E
PsCam022213	48.9316	chr5LG3	113840563	3		K	K	K	E	K	E	K	E	E	E	E	E	E	E	K	E	K	K	K	E	K	K	E	E	E	E	E	E	K	K	K	E	K	K	K	K	K	E	E	K	E	E	E	E
PsCam001871	48.9316	chr5LG3	113857611	3		K	K	K	E	K	E	K	E	E	E	E	E	E	E	K	E	K	K	K	E	K	K	E	E	E	E	E	E	K	K	K	E	K	K	K	K	K	E	E	K	E	E	E	E
PsCam042926	48.9316	chr5LG3	114330670	3		K	K	K	E	K	E	K	E	E	E	E	E	E	E	K	E	K	K	K	E	K	K	E	E	E	E	E	E	K	K	K	E	K	K	K	K	K	E	E	K	E	E	E	E
PsCam005530	49.0523	chr5LG3	114342485	3		K	K	K	E	K	E	K	E	E	E	E	E	E	E	K	E	K	K	K	E	K	K	E	E	E	E	E	E	K	K	K	E	K	K	K	K	K	E	E	K	E	E	E	E
PsCam049606	49.0523	chr5LG3	115723122	3		K	K	K	E	K	E	K	E	E	E	E	E	E	E	K	E	K	K	K	E	K	K	E	E	E	E	E	E	K	K	K	E	K	K	K	K	K	E	E	K	E	E	E	E
PsCam053011	49.1729	chr5LG3	115758947	3		K	K	K	E	K	E	K	E	E	E	E	E	E	E	K	E	K	K	K	E	K	K	E	E	E	E	E	E	K	K	K	E	K	K	K	K	K	E	E	K	E	E	E	E
PsCam053050	49.1729	chr5LG3	114980784	3		K	K	K	E	K	E	K	E	E	E	E	E	E	E	K	E	K	K	K	E	K	K	E	E	E	E	E	E	K	K	K	E	K	K	K	K	K	E	E	K	E	E	E	E
PsCam026161	49.1729	chr5LG3	115054448	3		K	K	K	E	K	E	K	E	E	E	E	E	E	E	K	E	K	K	K	E	K	K	E	E	E	E	E	E	K	K	K	E	K	K	K	K	K	E	E	K	E	E	E	E
PsCam044127	49.1729	chr5LG3	115292555	3		K	K	K	E	K	E	K	E	E	E	E	E	E	E	K	E	K	K	K	E	K	K	E	E	E	E	E	E	K	K	K	E	K	K	K	K	K	E	E	K	E	E	E	E
PsCam057355	49.1729	chr5LG3	115497037	3		K	K	K	E	K	E	K	E	E	E	E	E	E	E	K	E	K	K	K	E	K	K	E	E	E	E	E	E	K	K	K	E	K	K	K	K	K	E	E	K	E	E	E	E
PsCam004311	49.2935	chr5LG3	124414024	3		K	K	K	E	K	E	K	E	E	E	E	E	E	E	K	E	K	K	K	E	K	K	E	E	E	E	E	E	K	K	K	E	K	K	K	K	K	E	E	K	E	E	E	E
PsCam048824	49.2935	chr5LG3	123214225	3		K	K	K	E	K	E	K	E	E	E	E	E	E	E	K	E	K	K	K	E	K	K	E	E	E	E	E	E	K	K	K	E	K	K	K	K	K	E	E	K	E	E	E	E
PsCam038860	49.658	chr5LG3	115894631	3		K	K	K	E	K	E	K	E	E	E	E	E	E	E	K	E	K	K	K	E	K	K	E	E	E	E	E	E	K	K	K	E	K	K	K	K	K	E	E	K	E	E	E	E
PsCam050282	49.658	chr5LG3	119269709	3		K	K	K	E	K	E	K	E	E	E	E	E	E	E	K	E	K	K	K	E	K	K	E	E	E	E	E	E	K	K	K	E	K	K	K	K	K	E	E	K	E	E	E	E
PsCam059606	49.658	chr5LG3	116177048	3		K	K	K	E	K	E	K	E	E	E	E	E	E	E	K	E	K	K	K	E	K	K	E	E	E	E	E	E	K	K	K	E	K	K	K	K	K	E	E	K	E	E	E	E
PsCam034031	49.658	chr5LG3	121207159	3		K	K	K	E	K	E	K	E	E	E	E	E	E	E	K	E	K	K	K	E	K	K	E	E	E	E	E	E	K	K	K	E	K	K	K	K	K	E	E	K	E	E	E	E
PsCam037486	49.658	chr5LG3	121856768	3		K	K	K	E	K	E	K	E	E	E	E	E	E	E	K	E	K	K	K	E	K	K	E	E	E	E	E	E	K	K	K	E	K	K	K	K	K	E	E	K	E	E	E	E
PsCam056354	49.658	chr5LG3	124111168	3		K	K	K	E	K	E	K	E	E	E	E	E	E	E	K	E	K	K	K	E	K	K	E	E	E	E	E	E	K	K	K	E	K	K	K	K	K	E	E	K	E	E	E	E
PsCam007988	49.658	chr5LG3	124112629	3		K	K	K	E	K	E	K	E	E	E	E	E	E	E	K	E	K	K	K	E	K	K	E	E	E	E	E	E	K	K	K	E	K	K	K	K	K	E	E	K	E	E	E	E
PsCam030865	49.658	chr5LG3	124141869	3		K	K	K	E	K	E	K	E	E	E	E	E	E	E	K	E	K	K	K	E	K	K	E	E	E	E	E	E	K	K	K	E	K	K	K	K	K	E	E	K	E	E	E	E
PsCam003379	49.658	chr5LG3	124146767	3		K	K	K	E	K	E	K	E	E	E	E	E	E	E	K	E	K	K	K	E	K	K	E	E	E	E	E	E	K	K	K	E	K	-	K	K	K	E	E	K	E	E	E	E
PsCam036176	49.658	chr5LG3	125024305	3		K	K	K	E	K	E	K	E	E	E	E	E	E	E	K	E	K	K	K	E	K	K	E	E	E	E	E	E	K	K	K	E	K	K	K	K	K	E	E	K	E	E	E	E
PsCam040939	49.658	chr5LG3	125249516	3		K	K	K	E	K	E	K	E	E	E	E	E	E	E	K	E	K	K	K	E	K	K	E	E	E	E	E	E	K	K	K	E	K	K	K	K	K	E	E	K	E	E	E	E
PsCam051871	49.9002	chr5LG3	126578624	3		K	K	K	E	K	E	K	E	E	E	E	E	E	E	K	E	K	K	K	E	K	K	E	E	E	E	E	E	K	K	K	E	K	K	K	K	K	E	E	K	E	E	E	E
PsCam051159	50.0208	chr5LG3	126676805	3		K	K	K	E	K	E	K	E	E	E	K	E	E	E	K	E	K	K	K	E	K	K	E	E	E	E	E	E	K	K	K	E	K	K	K	K	K	E	E	K	E	E	E	E
PsCam049551	50.0208	chr5LG3	126087199	3		K	K	K	E	K	E	K	E	E	E	K	E	E	E	K	E	K	K	K	E	K	K	E	E	E	E	E	E	K	K	K	E	K	K	K	K	K	E	E	K	E	E	E	E
PsCam034758	50.0208	chr5LG3	125584344	3		K	K	K	E	K	E	K	E	E	E	K	E	E	E	K	E	K	K	K	E	K	K	E	E	E	E	E	E	K	K	K	E	K	K	K	K	K	E	E	K	E	E	E	E
PsCam056122	50.1414	chr5LG3	125721882	3		K	K	K	E	K	E	K	E	E	E	K	E	E	E	K	E	K	K	K	E	K	K	E	E	E	E	E	E	K	K	K	E	K	K	K	K	K	E	E	K	E	E	E	E
PsCam041011	50.1414	chr5LG3	125723221	3		K	K	K	E	K	E	K	E	E	E	K	E	E	E	K	E	K	K	K	E	K	K	E	E	E	E	E	E	K	K	K	E	K	K	K	K	K	E	E	K	E	E	E	E
PsCam043146	50.1414	chr5LG3	127491968	3		K	K	K	E	K	E	K	E	E	E	K	E	E	E	K	E	K	K	K	E	K	K	E	E	E	E	E	E	K	K	K	E	K	K	K	K	K	E	E	K	E	E	E	E
PsCam022738	50.1414	chr5LG3	127500184	3		K	K	K	E	K	E	K	E	E	E	K	E	E	E	K	E	K	K	K	E	K	K	E	E	E	E	E	E	K	K	K	E	K	K	K	K	K	E	E	K	E	E	E	E
PsCam042307	50.1414	chr5LG3	127539912	3		K	K	K	E	K	E	K	E	E	E	K	E	E	E	K	E	K	K	K	E	K	K	E	E	E	E	E	E	K	K	K	E	K	K	K	K	K	E	E	K	E	E	E	E
PsCam033737	50.1414	chr5LG3	128107383	3		-	-	-	-	-	-	-	-	-	-	-	-	-	-	-	-	-	-	-	-	-	-	-	-	-	-	-	-	-	-	-	-	-	-	-	-	-	-	-	-	-	-	-	-
PsCam036019	50.1414	chr5LG3	128161794	3		-	-	-	-	-	-	-	-	-	-	-	-	-	-	-	-	-	-	-	-	-	-	-	-	-	-	-	-	-	-	-	-	-	-	-	-	-	-	-	-	-	-	-	-
PsCam002704	50.3865	chr5LG3	128424617	3		-	-	-	-	-	-	-	-	-	-	-	-	-	-	-	-	-	-	-	-	-	-	-	-	-	-	-	-	-	-	-	-	-	-	-	-	-	-	-	-	-	-	-	-
PsCam033409	50.6316	chr5LG3	129986848	3		-	-	-	-	-	-	-	-	-	-	-	-	-	-	-	-	-	-	-	-	-	-	-	-	-	-	-	-	-	-	-	-	-	-	-	-	-	-	-	-	-	-	-	-
PsCam003567	50.6316	chr5LG3	130197960	3		-	-	-	-	-	-	-	-	-	-	-	-	-	-	-	-	-	-	-	-	-	-	-	-	-	-	-	-	-	-	-	-	-	-	-	-	-	-	-	-	-	-	-	-
PsCam000549	50.6316	chr5LG3	130243363	3		-	-	-	-	-	-	-	-	-	-	-	-	-	-	-	-	-	-	-	-	-	-	-	-	-	-	-	-	-	-	-	-	-	-	-	-	-	-	-	-	-	-	-	-
PsCam051393	50.6316	chr5LG3	127623895	3		-	-	-	-	-	-	-	-	-	-	-	-	-	-	-	-	-	-	-	-	-	-	-	-	-	-	-	-	-	-	-	-	-	-	-	-	-	-	-	-	-	-	-	-
PsCam032401	50.6316	chr5LG3	130359479	3		-	-	-	-	-	-	-	-	-	-	-	-	-	-	-	-	-	-	-	-	-	-	-	-	-	-	-	-	-	-	-	-	-	-	-	-	-	-	-	-	-	-	-	-
PsCam019069	50.8767	chr5LG3	131020451	3		-	-	-	-	-	-	-	-	-	-	-	-	-	-	-	-	-	-	-	-	-	-	-	-	-	-	-	-	-	-	-	-	-	-	-	-	-	-	-	-	-	-	-	-
PsCam038474	50.8767	chr5LG3	131097899	3		-	-	-	-	-	-	-	-	-	-	-	-	-	-	-	-	-	-	-	-	-	-	-	-	-	-	-	-	-	-	-	-	-	-	-	-	-	-	-	-	-	-	-	-
PsCam044788	50.9991	chr5LG3	131276500	3		-	-	-	-	-	-	-	-	-	-	-	-	-	-	-	-	-	-	-	-	-	-	-	-	-	-	-	-	-	-	-	-	-	-	-	-	-	-	-	-	-	-	-	-
PsCam040746	51.1215	chr5LG3	131321732	3		-	-	-	-	-	-	-	-	-	-	-	-	-	-	-	-	-	-	-	-	-	-	-	-	-	-	-	-	-	-	-	-	-	-	-	-	-	-	-	-	-	-	-	-
PsCam048963	51.2439	chr5LG3	131705063	3		-	-	-	-	-	-	-	-	-	-	-	-	-	-	-	-	-	-	-	-	-	-	-	-	-	-	-	-	-	-	-	-	-	-	-	-	-	-	-	-	-	-	-	-
PsCam046684	51.2439	chr5LG3	131744582	3		-	-	-	-	-	-	-	-	-	-	-	-	-	-	-	-	-	-	-	-	-	-	-	-	-	-	-	-	-	-	-	-	-	-	-	-	-	-	-	-	-	-	-	-
PsCam002711	51.2439	chr5LG3	131890798	3		-	-	-	-	-	-	-	-	-	-	-	-	-	-	-	-	-	-	-	-	-	-	-	-	-	-	-	-	-	-	-	-	-	-	-	-	-	-	-	-	-	-	-	-
PsCam052835	51.2439	chr5LG3	131974461	3		-	-	-	-	-	-	-	-	-	-	-	-	-	-	-	-	-	-	-	-	-	-	-	-	-	-	-	-	-	-	-	-	-	-	-	-	-	-	-	-	-	-	-	-
PsCam034413	51.3672	chr5LG3	138038369	3		-	-	-	-	-	-	-	-	-	-	-	-	-	-	-	-	-	-	-	-	-	-	-	-	-	-	-	-	-	-	-	-	-	-	-	-	-	-	-	-	-	-	-	-
PsCam018246	51.7399	chr5LG3	137361507	3		-	-	-	-	-	-	-	-	-	-	-	-	-	-	-	-	-	-	-	-	-	-	-	-	-	-	-	-	-	-	-	-	-	-	-	-	-	-	-	-	-	-	-	-
PsCam034119	52.1126	chr5LG3	134310820	3		-	-	-	-	-	-	-	-	-	-	-	-	-	-	-	-	-	-	-	-	-	-	-	-	-	-	-	-	-	-	-	-	-	-	-	-	-	-	-	-	-	-	-	-
PsCam009539	52.1126	chr5LG3	134356115	3		-	-	-	-	-	-	-	-	-	-	-	-	-	-	-	-	-	-	-	-	-	-	-	-	-	-	-	-	-	-	-	-	-	-	-	-	-	-	-	-	-	-	-	-
PsCam044506	52.1126	chr5LG3	134385463	3		-	-	-	-	-	-	-	-	-	-	-	-	-	-	-	-	-	-	-	-	-	-	-	-	-	-	-	-	-	-	-	-	-	-	-	-	-	-	-	-	-	-	-	-
PsCam054071	52.2347	chr5LG3	134723018	3		-	-	-	-	-	-	-	-	-	-	-	-	-	-	-	-	-	-	-	-	-	-	-	-	-	-	-	-	-	-	-	-	-	-	-	-	-	-	-	-	-	-	-	-
PsCam045818	52.2347	chr5LG3	134732344	3		-	-	-	-	-	-	-	-	-	-	-	-	-	-	-	-	-	-	-	-	-	-	-	-	-	-	-	-	-	-	-	-	-	-	-	-	-	-	-	-	-	-	-	-
PsCam005828	52.2347	chr5LG3	134839829	3		-	-	-	-	-	-	-	-	-	-	-	-	-	-	-	-	-	-	-	-	-	-	-	-	-	-	-	-	-	-	-	-	-	-	-	-	-	-	-	-	-	-	-	-
PsCam002319	52.2347	chr5LG3	134874912	3		-	-	-	-	-	-	-	-	-	-	-	-	-	-	-	-	-	-	-	-	-	-	-	-	-	-	-	-	-	-	-	-	-	-	-	-	-	-	-	-	-	-	-	-
PsCam026086	52.2347	chr5LG3	134876923	3		-	-	-	-	-	-	-	-	-	-	-	-	-	-	-	-	-	-	-	-	-	-	-	-	-	-	-	-	-	-	-	-	-	-	-	-	-	-	-	-	-	-	-	-
PsCam051238	52.3568	chr5LG3	135091997	3		-	-	-	-	-	-	-	-	-	-	-	-	-	-	-	-	-	-	-	-	-	-	-	-	-	-	-	-	-	-	-	-	-	-	-	-	-	-	-	-	-	-	-	-
PsCam017358	52.6019	chr5LG3	135163871	3		-	-	-	-	-	-	-	-	-	-	-	-	-	-	-	-	-	-	-	-	-	-	-	-	-	-	-	-	-	-	-	-	-	-	-	-	-	-	-	-	-	-	-	-
PsCam037526	52.6019	chr5LG3	135867270	3		-	-	-	-	-	-	-	-	-	-	-	-	-	-	-	-	-	-	-	-	-	-	-	-	-	-	-	-	-	-	-	-	-	-	-	-	-	-	-	-	-	-	-	-
PsCam042625	52.6019	chr5LG3	135984580	3		-	-	-	-	-	-	-	-	-	-	-	-	-	-	-	-	-	-	-	-	-	-	-	-	-	-	-	-	-	-	-	-	-	-	-	-	-	-	-	-	-	-	-	-
PsCam021124	52.6019	chr5LG3	136046815	3		-	-	-	-	-	-	-	-	-	-	-	-	-	-	-	-	-	-	-	-	-	-	-	-	-	-	-	-	-	-	-	-	-	-	-	-	-	-	-	-	-	-	-	-
PsCam035065	52.6019	chr5LG3	136123209	3		-	-	-	-	-	-	-	-	-	-	-	-	-	-	-	-	-	-	-	-	-	-	-	-	-	-	-	-	-	-	-	-	-	-	-	-	-	-	-	-	-	-	-	-
PsCam021230	52.6019	chr5LG3	136126561	3		-	-	-	-	-	-	-	-	-	-	-	-	-	-	-	-	-	-	-	-	-	-	-	-	-	-	-	-	-	-	-	-	-	-	-	-	-	-	-	-	-	-	-	-
PsCam049805	52.724	chr5LG3	136398147	3		-	-	-	-	-	-	-	-	-	-	-	-	-	-	-	-	-	-	-	-	-	-	-	-	-	-	-	-	-	-	-	-	-	-	-	-	-	-	-	-	-	-	-	-
PsCam010973	52.724	chr5LG3	137489619	3		-	-	-	-	-	-	-	-	-	-	-	-	-	-	-	-	-	-	-	-	-	-	-	-	-	-	-	-	-	-	-	-	-	-	-	-	-	-	-	-	-	-	-	-
PsCam014177	52.724	chr5LG3	137570123	3		-	-	-	-	-	-	-	-	-	-	-	-	-	-	-	-	-	-	-	-	-	-	-	-	-	-	-	-	-	-	-	-	-	-	-	-	-	-	-	-	-	-	-	-
PsCam036245	52.724	chr5LG3	137671857	3		-	-	-	-	-	-	-	-	-	-	-	-	-	-	-	-	-	-	-	-	-	-	-	-	-	-	-	-	-	-	-	-	-	-	-	-	-	-	-	-	-	-	-	-
PsCam042991	53.093	chr5LG3	137713049	3		-	-	-	-	-	-	-	-	-	-	-	-	-	-	-	-	-	-	-	-	-	-	-	-	-	-	-	-	-	-	-	-	-	-	-	-	-	-	-	-	-	-	-	-
PsCam010794	53.462	chr5LG3	138544330	3		-	-	-	-	-	-	-	-	-	-	-	-	-	-	-	-	-	-	-	-	-	-	-	-	-	-	-	-	-	-	-	-	-	-	-	-	-	-	-	-	-	-	-	-
PsCam048343	53.462	chr5LG3	138525391	3		-	-	-	-	-	-	-	-	-	-	-	-	-	-	-	-	-	-	-	-	-	-	-	-	-	-	-	-	-	-	-	-	-	-	-	-	-	-	-	-	-	-	-	-
PsCam038136	53.462	chr5LG3	138276896	3		-	-	-	-	-	-	-	-	-	-	-	-	-	-	-	-	-	-	-	-	-	-	-	-	-	-	-	-	-	-	-	-	-	-	-	-	-	-	-	-	-	-	-	-
PsCam035897	53.462	chr5LG3	138351217	3		-	-	-	-	-	-	-	-	-	-	-	-	-	-	-	-	-	-	-	-	-	-	-	-	-	-	-	-	-	-	-	-	-	-	-	-	-	-	-	-	-	-	-	-
PsCam049818	53.5841	chr5LG3	141150246	3		-	-	-	-	-	-	-	-	-	-	-	-	-	-	-	-	-	-	-	-	-	-	-	-	-	-	-	-	-	-	-	-	-	-	-	-	-	-	-	-	-	-	-	-
PsCam030789	53.5841	chr5LG3	138957144	3		-	-	-	-	-	-	-	-	-	-	-	-	-	-	-	-	-	-	-	-	-	-	-	-	-	-	-	-	-	-	-	-	-	-	-	-	-	-	-	-	-	-	-	-
PsCam001039	53.5841	chr5LG3	139252134	3		-	-	-	-	-	-	-	-	-	-	-	-	-	-	-	-	-	-	-	-	-	-	-	-	-	-	-	-	-	-	-	-	-	-	-	-	-	-	-	-	-	-	-	-
PsCam057750	53.5841	chr5LG3	139281592	3		-	-	-	-	-	-	-	-	-	-	-	-	-	-	-	-	-	-	-	-	-	-	-	-	-	-	-	-	-	-	-	-	-	-	-	-	-	-	-	-	-	-	-	-
PsCam050008	53.5841	chr5LG3	140043687	3		-	-	-	-	-	-	-	-	-	-	-	-	-	-	-	-	-	-	-	-	-	-	-	-	-	-	-	-	-	-	-	-	-	-	-	-	-	-	-	-	-	-	-	-
PsCam035471	53.5841	chr5LG3	140262158	3		-	-	-	-	-	-	-	-	-	-	-	-	-	-	-	-	-	-	-	-	-	-	-	-	-	-	-	-	-	-	-	-	-	-	-	-	-	-	-	-	-	-	-	-
PsCam034671	53.5841	chr5LG3	140460637	3		-	-	-	-	-	-	-	-	-	-	-	-	-	-	-	-	-	-	-	-	-	-	-	-	-	-	-	-	-	-	-	-	-	-	-	-	-	-	-	-	-	-	-	-
PsCam030853	53.5841	chr5LG3	141642485	3		-	-	-	-	-	-	-	-	-	-	-	-	-	-	-	-	-	-	-	-	-	-	-	-	-	-	-	-	-	-	-	-	-	-	-	-	-	-	-	-	-	-	-	-
PsCam049159	53.5841	chr5LG3	141650008	3		-	-	-	-	-	-	-	-	-	-	-	-	-	-	-	-	-	-	-	-	-	-	-	-	-	-	-	-	-	-	-	-	-	-	-	-	-	-	-	-	-	-	-	-
PsCam017096	53.5841	chr5LG3	139973351	3		-	-	-	-	-	-	-	-	-	-	-	-	-	-	-	-	-	-	-	-	-	-	-	-	-	-	-	-	-	-	-	-	-	-	-	-	-	-	-	-	-	-	-	-
PsCam013048	53.5841	chr5LG3	139758728	3		-	-	-	-	-	-	-	-	-	-	-	-	-	-	-	-	-	-	-	-	-	-	-	-	-	-	-	-	-	-	-	-	-	-	-	-	-	-	-	-	-	-	-	-
PsCam022188	53.5841	chr5LG3	139674200	3		-	-	-	-	-	-	-	-	-	-	-	-	-	-	-	-	-	-	-	-	-	-	-	-	-	-	-	-	-	-	-	-	-	-	-	-	-	-	-	-	-	-	-	-
PsCam057137	53.5841	chr5LG3	139670480	3		-	-	-	-	-	-	-	-	-	-	-	-	-	-	-	-	-	-	-	-	-	-	-	-	-	-	-	-	-	-	-	-	-	-	-	-	-	-	-	-	-	-	-	-
PsCam004398	53.5841	chr5LG3	141520430	3		-	-	-	-	-	-	-	-	-	-	-	-	-	-	-	-	-	-	-	-	-	-	-	-	-	-	-	-	-	-	-	-	-	-	-	-	-	-	-	-	-	-	-	-
PsCam044273	53.5841	chr5LG3	141537682	3		-	-	-	-	-	-	-	-	-	-	-	-	-	-	-	-	-	-	-	-	-	-	-	-	-	-	-	-	-	-	-	-	-	-	-	-	-	-	-	-	-	-	-	-
PsCam030930	53.7062	chr5LG3	142033892	3		-	-	-	-	-	-	-	-	-	-	-	-	-	-	-	-	-	-	-	-	-	-	-	-	-	-	-	-	-	-	-	-	-	-	-	-	-	-	-	-	-	-	-	-
PsCam058449	53.7062	chr5LG3	142178261	3		-	-	-	-	-	-	-	-	-	-	-	-	-	-	-	-	-	-	-	-	-	-	-	-	-	-	-	-	-	-	-	-	-	-	-	-	-	-	-	-	-	-	-	-
PsCam046418	53.8283	chr5LG3	142451999	3		-	-	-	-	-	-	-	-	-	-	-	-	-	-	-	-	-	-	-	-	-	-	-	-	-	-	-	-	-	-	-	-	-	-	-	-	-	-	-	-	-	-	-	-
PsCam031705	53.8283	chr5LG3	142471784	3		-	-	-	-	-	-	-	-	-	-	-	-	-	-	-	-	-	-	-	-	-	-	-	-	-	-	-	-	-	-	-	-	-	-	-	-	-	-	-	-	-	-	-	-
PsCam049664	53.8283	chr5LG3	142473561	3		-	-	-	-	-	-	-	-	-	-	-	-	-	-	-	-	-	-	-	-	-	-	-	-	-	-	-	-	-	-	-	-	-	-	-	-	-	-	-	-	-	-	-	-
PsCam003701	53.8283	chr5LG3	144037961	3		-	-	-	-	-	-	-	-	-	-	-	-	-	-	-	-	-	-	-	-	-	-	-	-	-	-	-	-	-	-	-	-	-	-	-	-	-	-	-	-	-	-	-	-
PsCam056250	54.7066	chr5LG3	144953618	3		-	-	-	-	-	-	-	-	-	-	-	-	-	-	-	-	-	-	-	-	-	-	-	-	-	-	-	-	-	-	-	-	-	-	-	-	-	-	-	-	-	-	-	-
PsCam036263	55.4566	chr5LG3	146524316	3		-	-	-	-	-	-	-	-	-	-	-	-	-	-	-	-	-	-	-	-	-	-	-	-	-	-	-	-	-	-	-	-	-	-	-	-	-	-	-	-	-	-	-	-
PsCam036977	55.4566	chr5LG3	146529353	3		-	-	-	-	-	-	-	-	-	-	-	-	-	-	-	-	-	-	-	-	-	-	-	-	-	-	-	-	-	-	-	-	-	-	-	-	-	-	-	-	-	-	-	-
PsCam034184	55.4566	chr5LG3	146553297	3		-	-	-	-	-	-	-	-	-	-	-	-	-	-	-	-	-	-	-	-	-	-	-	-	-	-	-	-	-	-	-	-	-	-	-	-	-	-	-	-	-	-	-	-
PsCam016014	55.4566	chr5LG3	146613324	3		-	-	-	-	-	-	-	-	-	-	-	-	-	-	-	-	-	-	-	-	-	-	-	-	-	-	-	-	-	-	-	-	-	-	-	-	-	-	-	-	-	-	-	-
PsCam038917	55.9504	chr5LG3	148832345	3		-	-	-	-	-	-	-	-	-	-	-	-	-	-	-	-	-	-	-	-	-	-	-	-	-	-	-	-	-	-	-	-	-	-	-	-	-	-	-	-	-	-	-	-
PsCam011829	55.9504	chr5LG3	149001901	3		-	-	-	-	-	-	-	-	-	-	-	-	-	-	-	-	-	-	-	-	-	-	-	-	-	-	-	-	-	-	-	-	-	-	-	-	-	-	-	-	-	-	-	-
PsCam012044	55.9504	chr5LG3	147588124	3		-	-	-	-	-	-	-	-	-	-	-	-	-	-	-	-	-	-	-	-	-	-	-	-	-	-	-	-	-	-	-	-	-	-	-	-	-	-	-	-	-	-	-	-
PsCam019491	55.9504	chr5LG3	147589096	3		-	-	-	-	-	-	-	-	-	-	-	-	-	-	-	-	-	-	-	-	-	-	-	-	-	-	-	-	-	-	-	-	-	-	-	-	-	-	-	-	-	-	-	-
PsCam038467	55.9504	chr5LG3	150454174	3		-	-	-	-	-	-	-	-	-	-	-	-	-	-	-	-	-	-	-	-	-	-	-	-	-	-	-	-	-	-	-	-	-	-	-	-	-	-	-	-	-	-	-	-
PsCam042994	55.9504	chr5LG3	148081788	3		-	-	-	-	-	-	-	-	-	-	-	-	-	-	-	-	-	-	-	-	-	-	-	-	-	-	-	-	-	-	-	-	-	-	-	-	-	-	-	-	-	-	-	-
PsCam040597	55.9504	chr5LG3	148180988	3		-	-	-	-	-	-	-	-	-	-	-	-	-	-	-	-	-	-	-	-	-	-	-	-	-	-	-	-	-	-	-	-	-	-	-	-	-	-	-	-	-	-	-	-
PsCam038799	56.5842	scaffold02303	253940	3		-	-	-	-	-	-	-	-	-	-	-	-	-	-	-	-	-	-	-	-	-	-	-	-	-	-	-	-	-	-	-	-	-	-	-	-	-	-	-	-	-	-	-	-
PsCam039052	56.5842	scaffold03071	151809	3		-	-	-	-	-	-	-	-	-	-	-	-	-	-	-	-	-	-	-	-	-	-	-	-	-	-	-	-	-	-	-	-	-	-	-	-	-	-	-	-	-	-	-	-
PsCam045173	56.8293	chr5LG3	152898381	3		-	-	-	-	-	-	-	-	-	-	-	-	-	-	-	-	-	-	-	-	-	-	-	-	-	-	-	-	-	-	-	-	-	-	-	-	-	-	-	-	-	-	-	-
PsCam038040	56.9517	chr5LG3	153015874	3		-	-	-	-	-	-	-	-	-	-	-	-	-	-	-	-	-	-	-	-	-	-	-	-	-	-	-	-	-	-	-	-	-	-	-	-	-	-	-	-	-	-	-	-
PsCam045139	56.9517	chr5LG3	153174889	3		-	-	-	-	-	-	-	-	-	-	-	-	-	-	-	-	-	-	-	-	-	-	-	-	-	-	-	-	-	-	-	-	-	-	-	-	-	-	-	-	-	-	-	-
PsCam050765	56.9517	chr5LG3	153246708	3		-	-	-	-	-	-	-	-	-	-	-	-	-	-	-	-	-	-	-	-	-	-	-	-	-	-	-	-	-	-	-	-	-	-	-	-	-	-	-	-	-	-	-	-
PsCam006651	57.1968	chr5LG3	154645822	3		-	-	-	-	-	-	-	-	-	-	-	-	-	-	-	-	-	-	-	-	-	-	-	-	-	-	-	-	-	-	-	-	-	-	-	-	-	-	-	-	-	-	-	-
PsCam057520	57.1968	chr5LG3	154885367	3		-	-	-	-	-	-	-	-	-	-	-	-	-	-	-	-	-	-	-	-	-	-	-	-	-	-	-	-	-	-	-	-	-	-	-	-	-	-	-	-	-	-	-	-
PsCam002304	57.1968	chr5LG3	155065718	3		-	-	-	-	-	-	-	-	-	-	-	-	-	-	-	-	-	-	-	-	-	-	-	-	-	-	-	-	-	-	-	-	-	-	-	-	-	-	-	-	-	-	-	-
PsCam037014	57.1968	chr5LG3	155213252	3		-	-	-	-	-	-	-	-	-	-	-	-	-	-	-	-	-	-	-	-	-	-	-	-	-	-	-	-	-	-	-	-	-	-	-	-	-	-	-	-	-	-	-	-
PsCam036403	57.3189	chr5LG3	155510580	3		-	-	-	-	-	-	-	-	-	-	-	-	-	-	-	-	-	-	-	-	-	-	-	-	-	-	-	-	-	-	-	-	-	-	-	-	-	-	-	-	-	-	-	-
PsCam037419	57.3189	chr5LG3	158305847	3		-	-	-	-	-	-	-	-	-	-	-	-	-	-	-	-	-	-	-	-	-	-	-	-	-	-	-	-	-	-	-	-	-	-	-	-	-	-	-	-	-	-	-	-
PsCam053726	57.3189	chr5LG3	155741587	3		-	-	-	-	-	-	-	-	-	-	-	-	-	-	-	-	-	-	-	-	-	-	-	-	-	-	-	-	-	-	-	-	-	-	-	-	-	-	-	-	-	-	-	-
PsCam035613	57.3189	chr5LG3	156143076	3		-	-	-	-	-	-	-	-	-	-	-	-	-	-	-	-	-	-	-	-	-	-	-	-	-	-	-	-	-	-	-	-	-	-	-	-	-	-	-	-	-	-	-	-
PsCam000645	57.3189	chr5LG3	155986279	3		-	-	-	-	-	-	-	-	-	-	-	-	-	-	-	-	-	-	-	-	-	-	-	-	-	-	-	-	-	-	-	-	-	-	-	-	-	-	-	-	-	-	-	-
PsCam001735	57.3189	chr5LG3	157390128	3		-	-	-	-	-	-	-	-	-	-	-	-	-	-	-	-	-	-	-	-	-	-	-	-	-	-	-	-	-	-	-	-	-	-	-	-	-	-	-	-	-	-	-	-
PsCam040054	57.3189	chr5LG3	157391299	3		-	-	-	-	-	-	-	-	-	-	-	-	-	-	-	-	-	-	-	-	-	-	-	-	-	-	-	-	-	-	-	-	-	-	-	-	-	-	-	-	-	-	-	-
PsCam057703	64.1476	chr5LG3	173489623	3		-	-	-	-	-	-	-	-	-	-	-	-	-	-	-	-	-	-	-	-	-	-	-	-	-	-	-	-	-	-	-	-	-	-	-	-	-	-	-	-	-	-	-	-
PsCam037019	66.6863	chr5LG3	178725050	3		E	K	E	E	K	E	K	E	E	E	K	E	E	E	K	E	K	K	K	E	K	K	K	K	K	K	E	E	K	K	K	E	K	K	E	K	K	E	E	E	E	E	E	K
PsCam008383	66.6863	chr5LG3	177992841	3		E	K	E	E	K	E	K	E	E	E	K	E	E	E	K	E	K	K	K	E	K	K	K	K	K	K	E	E	K	K	K	E	K	K	E	K	K	E	E	E	E	E	E	K
PsCam005459	66.929	chr5LG3	180320602	3		E	K	E	E	K	E	K	E	E	E	K	E	E	E	K	E	K	K	K	E	K	K	K	K	K	K	E	E	K	K	K	E	K	K	E	K	K	E	E	E	E	E	E	K
PsCam024697	67.1717	chr5LG3	181280137	3		E	K	E	E	K	E	K	E	E	E	K	-	E	E	K	E	K	K	K	E	K	K	K	K	K	K	E	E	K	K	K	E	K	K	E	K	K	E	E	E	E	E	E	K
PsCam048305	67.2926	chr5LG3	182375139	3		E	K	E	E	K	E	K	E	E	E	K	-	E	E	K	E	K	K	K	E	K	K	K	K	K	K	E	E	K	K	K	E	K	K	E	K	K	E	E	E	E	E	E	K
PsCam046079	67.4135	chr5LG3	182026450	3		E	K	E	E	K	E	K	E	E	E	K	-	E	E	K	E	K	K	K	E	K	K	K	K	K	K	E	E	K	K	K	E	K	K	E	K	K	E	E	E	E	E	E	K
PsCam037762	67.4135	chr5LG3	184581889	3		E	K	E	E	K	E	K	E	E	E	K	-	E	E	K	E	K	K	K	E	K	K	K	K	K	K	E	E	K	K	K	E	K	K	E	K	K	E	E	E	E	E	E	K
PsCam010923	67.4135	chr5LG3	184524769	3		E	K	E	E	K	E	K	E	E	E	K	K	E	E	K	E	K	K	K	E	K	K	K	K	K	K	E	E	K	K	K	E	K	K	E	K	K	E	E	E	E	E	E	K
PsCam010713	67.5342	chr5LG3	185385592	3		E	K	E	E	K	E	K	E	E	E	K	K	E	K	K	E	K	K	K	E	K	K	K	K	K	K	E	E	K	K	K	E	K	K	E	K	K	E	E	E	E	E	E	K
PsCam055917	67.5342	chr5LG3	187214784	3		E	K	E	E	K	E	K	E	E	E	K	K	E	K	K	E	K	K	K	E	K	K	K	K	K	K	E	E	K	K	K	E	K	K	E	K	K	E	E	E	E	E	E	K
PsCam035684	67.5342	chr5LG3	184027319	3		E	K	E	E	K	E	K	E	E	E	K	K	E	K	K	E	K	K	K	E	K	K	K	K	K	K	E	E	K	K	K	E	K	K	E	K	K	E	E	E	E	E	E	K
PsCam042334	67.5342	chr5LG3	183005408	3		E	K	E	E	K	E	K	E	E	E	K	K	E	K	K	E	K	K	K	E	K	K	K	K	K	K	E	E	K	K	K	E	K	K	E	K	K	E	E	E	E	E	E	K
PsCam037078	67.5342	chr5LG3	185100257	3		E	K	E	E	K	E	K	E	E	E	K	K	E	K	K	E	K	K	K	E	K	K	K	K	K	K	E	E	K	K	K	E	K	K	E	K	K	E	E	E	E	E	E	K
PsCam000460	67.5342	chr5LG3	183937150	3		E	K	E	E	K	E	K	E	E	E	K	K	E	K	K	E	K	K	K	E	K	K	K	K	K	K	E	E	K	K	K	E	K	K	E	K	K	E	E	E	E	E	E	K
PsCam043141	67.5342	chr5LG3	183906517	3		E	K	E	E	K	E	K	E	E	E	K	K	E	K	K	E	K	K	K	E	K	K	K	K	K	K	E	E	K	K	K	E	K	K	E	K	K	E	E	E	E	E	E	K
PsCam052405	67.5342	chr5LG3	183238399	3		E	K	E	E	K	E	K	E	E	E	K	K	E	K	K	E	K	K	K	E	K	K	K	K	K	K	E	E	K	K	K	E	K	K	E	K	K	E	E	E	E	E	E	K
PsCam042194	67.5342	chr5LG3	183223516	3		E	K	E	E	K	E	K	E	E	E	K	K	E	K	K	E	K	K	K	E	K	K	K	K	K	K	E	E	K	K	K	E	K	K	E	K	K	E	E	E	E	E	E	K
PsCam018134	67.5342	chr5LG3	183207632	3		E	K	E	E	K	E	K	E	E	E	K	K	E	K	K	E	K	K	K	E	K	K	K	K	K	K	E	E	K	K	K	E	K	K	E	K	K	E	E	E	E	E	E	K
PsCam051047	67.5342	chr5LG3	183079638	3		E	K	E	E	K	E	K	E	E	E	K	K	E	K	K	E	K	K	K	E	K	K	K	K	K	K	E	E	K	K	K	E	K	K	E	K	K	E	E	E	E	E	E	K
PsCam035534	67.5342	chr5LG3	182510058	3		E	K	E	E	K	E	K	E	E	E	K	K	E	K	K	E	K	K	K	E	K	K	K	K	K	K	E	E	K	K	K	E	K	K	E	K	K	E	E	E	E	E	E	K
PsCam010740	67.6548	chr5LG3	186794960	3		E	K	E	E	K	E	K	E	E	E	K	K	E	K	K	E	K	K	K	E	K	K	K	K	K	K	E	E	K	K	K	E	K	K	E	K	K	E	E	E	E	E	E	K
PsCam052046	67.6548	chr5LG3	185573053	3		E	K	E	E	K	E	K	E	E	E	K	K	E	K	K	E	K	K	K	E	K	K	K	K	K	K	E	E	K	K	K	E	K	K	E	K	K	E	E	E	E	E	E	K
PsCam039931	67.6548	chr5LG3	184664431	3		E	K	E	E	K	E	K	E	E	E	K	K	E	K	K	E	K	K	K	E	K	K	K	K	K	K	E	E	K	K	K	E	K	K	E	K	K	E	E	E	E	E	E	K
PsCam055092	67.6548	chr5LG3	184678059	3		E	K	E	E	K	E	K	E	E	E	K	K	E	K	K	E	K	K	K	E	K	K	K	K	K	K	E	E	K	K	K	E	K	K	E	K	K	E	E	E	E	E	E	K
PsCam045343	67.6548	chr5LG3	186440374	3		E	K	E	E	K	E	K	E	E	E	K	K	E	K	K	E	K	K	K	E	K	K	K	K	K	K	E	E	K	K	K	E	K	K	E	K	K	E	E	E	E	E	E	K
PsCam035355	68.2668	chr5LG3	187760035	3		E	K	E	E	K	E	K	E	E	E	K	K	E	K	K	E	K	K	K	E	K	K	K	K	K	K	E	E	K	K	K	E	K	K	E	K	K	E	E	E	E	E	E	K
PsCam026870	68.2668	chr5LG3	187795764	3		E	K	E	E	K	E	K	E	E	E	K	K	E	K	K	E	K	K	K	E	K	K	K	K	K	K	E	E	K	K	K	E	K	K	E	K	K	E	E	E	E	E	E	K
PsCam057846	68.2668	chr5LG3	187799200	3		E	K	E	E	K	E	K	E	E	E	K	K	E	K	K	E	K	K	K	E	K	K	K	K	K	K	E	E	K	K	K	E	K	K	E	K	K	E	E	E	E	E	E	K
PsCam006848	68.3874	chr5LG3	187891034	3		E	K	E	E	K	E	K	E	E	E	K	K	E	K	K	E	K	K	K	E	K	K	K	K	K	K	E	E	K	K	K	E	K	K	E	K	K	E	E	E	E	E	E	K
PsCam039559	68.3874	chr5LG3	188864431	3		E	K	E	E	K	E	K	E	E	E	K	K	E	K	K	E	K	K	K	E	K	K	K	K	K	K	E	E	K	K	K	E	K	K	E	K	K	E	E	E	E	E	E	K
PsCam057778	68.3874	chr5LG3	198220288	3		E	K	E	E	K	E	K	E	E	E	K	K	E	K	K	E	K	K	K	E	K	K	K	K	K	K	E	E	K	K	K	E	K	K	E	K	K	E	E	E	E	E	E	K
PsCam046039	68.3874	chr5LG3	189189537	3		E	K	E	E	K	E	K	E	E	E	K	K	E	K	K	E	K	K	K	E	K	K	K	K	K	K	E	E	K	K	K	E	K	K	E	K	K	E	E	E	E	E	E	K
PsCam035061	68.3874	chr5LG3	189522926	3		E	K	E	E	K	E	K	E	E	E	K	K	E	K	K	E	K	K	K	E	K	K	K	K	K	K	E	E	K	K	K	E	K	K	E	K	K	E	E	E	E	E	E	K
PsCam039314	68.508	chr5LG3	189556105	3		E	K	E	E	K	E	K	E	E	E	K	K	E	K	K	E	K	K	K	E	K	K	K	K	K	K	E	E	K	K	K	E	K	K	E	K	K	E	E	E	E	E	E	K
PsCam005484	68.508	chr5LG3	189609519	3		E	K	E	E	K	E	K	E	E	E	K	K	E	K	K	E	K	K	K	E	K	K	K	K	K	K	E	E	K	K	K	E	K	K	E	K	K	E	E	E	E	E	E	K
PsCam057789	68.508	chr5LG3	192137215	3		E	K	E	E	K	E	K	E	E	E	K	K	E	K	K	E	K	K	K	E	K	K	K	K	K	K	E	E	K	K	K	E	K	K	E	K	K	E	E	E	E	E	E	K
PsCam046241	69.6261	chr5LG3	192651780	3		E	K	E	E	K	E	K	E	E	E	K	K	E	K	K	E	K	K	K	E	K	K	K	K	K	K	E	E	K	K	K	E	K	K	E	K	K	E	E	E	E	E	E	K
PsCam042631	69.6261	chr5LG3	192663627	3		E	K	E	E	K	E	K	E	E	E	K	K	E	K	K	E	K	K	K	E	K	K	K	K	K	K	E	E	K	K	K	E	K	K	E	K	K	E	E	E	E	E	E	K
PsCam005834	69.6261	chr5LG3	192702264	3		E	K	E	E	K	E	K	E	E	E	K	K	E	K	K	E	K	K	K	E	K	K	K	K	K	K	E	E	K	K	K	E	K	K	E	K	K	E	E	E	E	E	E	K
PsCam002353	69.7467	chr5LG3	193165721	3		E	K	E	E	K	E	K	E	E	E	K	K	E	K	K	E	K	K	K	E	K	K	K	K	K	K	E	E	K	K	K	E	K	K	E	K	K	E	E	E	E	E	E	K
PsCam049453	69.7467	chr5LG3	197831240	3		E	K	E	E	K	E	K	E	E	E	K	K	E	K	K	E	K	K	K	E	K	K	K	K	K	K	E	E	K	K	K	E	K	K	E	K	K	E	E	E	E	E	E	K
PsCam059394	69.7467	chr5LG3	199661692	3		E	K	E	E	K	E	K	E	E	E	K	K	E	K	K	E	K	K	K	E	K	K	K	K	K	K	E	E	K	K	K	E	K	K	E	K	K	E	E	E	E	E	E	K
PsCam035564	69.7467	chr5LG3	199761067	3		E	K	E	E	K	E	K	E	E	E	K	K	E	K	K	E	K	K	K	E	K	K	K	K	K	K	E	E	K	K	K	E	K	K	E	K	K	E	E	E	E	E	E	K
PsCam029395	69.7467	chr5LG3	199764454	3		E	K	E	E	K	E	K	E	E	E	K	K	E	K	K	E	K	K	K	E	K	K	K	K	K	K	E	E	K	K	K	E	K	K	E	K	K	E	E	E	E	E	E	K
PsCam048054	69.7467	chr5LG3	199859704	3		E	K	E	E	K	E	K	E	E	E	K	K	E	K	K	E	K	K	K	E	K	K	K	K	K	K	E	E	K	K	K	E	K	K	E	K	K	E	E	E	E	E	E	K
PsCam023569	69.8674	chr5LG3	200441084	3		E	K	E	E	K	E	K	E	E	E	K	K	E	K	K	E	K	K	K	E	K	K	K	K	K	K	E	E	K	K	K	E	K	K	E	K	K	E	E	E	E	E	E	K
PsCam011109	69.8674	chr5LG3	200541858	3		E	K	E	E	K	E	K	E	E	E	K	K	E	K	K	E	K	K	K	E	K	K	K	K	K	K	E	E	K	K	K	E	K	K	E	K	K	E	E	E	E	E	E	K
PsCam043247	69.8674	chr5LG3	200563170	3		E	K	E	E	K	E	K	E	E	E	K	K	E	K	K	E	K	K	K	E	K	K	K	K	K	K	E	E	K	K	K	E	K	K	E	K	K	E	E	E	E	E	E	K
PsCam008160	69.8674	chr5LG3	200584811	3		E	K	E	E	K	E	K	E	E	E	K	K	E	K	K	E	K	K	K	E	K	K	K	K	K	K	E	E	K	K	K	E	K	K	E	K	K	E	E	E	E	E	E	K
PsCam023081	69.8674	chr5LG3	200605627	3		E	K	E	E	K	E	K	E	E	E	K	K	E	K	K	E	K	K	K	E	K	K	K	K	K	K	E	E	K	K	K	E	K	K	E	K	K	E	E	E	E	E	E	K
PsCam002955	69.8674	chr5LG3	200613837	3		E	K	E	E	K	E	K	E	E	E	K	K	E	K	K	E	K	K	K	E	K	K	K	K	K	K	E	E	K	K	K	E	K	K	E	K	K	E	E	E	E	E	E	K
PsCam034814	69.9883	chr5LG3	200721792	3		E	K	E	E	K	E	K	E	E	E	K	K	E	K	K	E	K	K	K	E	K	K	K	K	K	K	E	E	K	K	K	E	K	K	E	K	K	E	E	E	E	E	E	K
PsCam011389	69.9883	chr5LG3	200760712	3		E	K	E	E	K	E	K	E	E	E	K	K	E	K	K	E	K	K	K	E	K	K	K	K	K	K	E	E	K	K	K	E	K	K	E	K	K	E	E	E	E	E	E	K
PsCam003967	69.9883	chr5LG3	191383216	3		E	K	E	E	K	E	K	E	E	E	K	K	E	K	K	E	K	K	K	E	K	K	K	K	K	K	E	E	K	K	K	E	K	K	E	K	K	E	E	E	E	E	E	K
PsCam036453	70.1089	chr5LG3	191694654	3		E	K	E	E	K	E	K	E	E	E	K	K	E	K	K	E	K	K	K	E	K	K	K	K	K	K	E	E	K	K	K	E	K	K	E	K	K	E	E	E	E	E	E	K
PsCam042394	70.351	chr5LG3	192834681	3		E	K	E	E	K	E	K	E	E	E	K	K	E	K	K	E	K	K	K	E	K	K	K	K	K	K	E	E	K	K	K	E	K	K	E	K	K	E	E	E	E	E	E	K
PsCam011050	70.4717	chr5LG3	200894311	3		E	K	E	E	K	E	K	E	E	E	K	K	E	K	K	E	K	K	K	E	K	K	K	K	K	K	E	E	K	K	K	E	K	K	E	K	K	E	E	E	E	E	E	K
PsCam051956	70.4717	chr5LG3	200877321	3		E	K	E	E	K	E	K	E	E	E	K	K	E	K	K	E	K	K	K	E	K	K	K	K	K	K	E	E	K	K	K	E	K	K	E	K	K	E	E	E	E	E	E	K
PsCam035635	70.4717	chr5LG3	200874968	3		E	K	E	E	K	E	K	E	E	E	K	K	E	K	K	E	K	K	K	E	K	K	K	K	K	K	E	E	K	K	K	E	K	K	E	K	K	E	E	E	E	E	E	K
PsCam056130	70.4717	chr5LG3	201561655	3		E	K	E	E	K	E	K	E	E	E	K	K	E	K	K	E	K	K	K	E	K	K	K	K	K	K	E	E	K	K	K	E	K	K	E	K	K	E	E	E	E	E	E	K
PsCam030023	73.0696	chr5LG3	197702570	3		E	K	E	E	K	E	K	E	E	E	K	K	E	K	K	E	K	K	K	E	E	K	K	K	K	K	E	K	K	K	K	E	E	K	E	K	K	E	E	E	E	E	E	K
PsCam006941	73.0696	chr5LG3	201898831	3		E	K	E	E	K	E	K	E	E	E	K	K	E	K	K	E	K	K	K	E	E	K	K	K	K	K	E	K	K	K	K	E	E	K	E	K	K	E	E	E	E	E	E	K
PsCam034655	79.2227	chr5LG3	210511670	3		-	-	-	-	-	-	-	-	-	-	-	-	-	-	-	-	-	-	-	-	-	-	-	-	-	-	-	-	-	-	-	-	-	-	-	-	-	-	-	-	-	-	-	-
PsCam027316	79.2227	chr5LG3	210800574	3		-	-	-	-	-	-	-	-	-	-	-	-	-	-	-	-	-	-	-	-	-	-	-	-	-	-	-	-	-	-	-	-	-	-	-	-	-	-	-	-	-	-	-	-
PsCam056270	79.2227	chr5LG3	209966854	3		-	-	-	-	-	-	-	-	-	-	-	-	-	-	-	-	-	-	-	-	-	-	-	-	-	-	-	-	-	-	-	-	-	-	-	-	-	-	-	-	-	-	-	-
PsCam056213	79.2227	chr5LG3	211741862	3		-	-	-	-	-	-	-	-	-	-	-	-	-	-	-	-	-	-	-	-	-	-	-	-	-	-	-	-	-	-	-	-	-	-	-	-	-	-	-	-	-	-	-	-
PsCam056198	79.2227	chr5LG3	211587060	3		-	-	-	-	-	-	-	-	-	-	-	-	-	-	-	-	-	-	-	-	-	-	-	-	-	-	-	-	-	-	-	-	-	-	-	-	-	-	-	-	-	-	-	-
PsCam025419	79.2227	chr5LG3	212395588	3		-	-	-	-	-	-	-	-	-	-	-	-	-	-	-	-	-	-	-	-	-	-	-	-	-	-	-	-	-	-	-	-	-	-	-	-	-	-	-	-	-	-	-	-
PsCam036493	79.2227	chr5LG3	212630617	3		-	-	-	-	-	-	-	-	-	-	-	-	-	-	-	-	-	-	-	-	-	-	-	-	-	-	-	-	-	-	-	-	-	-	-	-	-	-	-	-	-	-	-	-
PsCam045624	79.3448	chr5LG3	212726408	3		-	-	-	-	-	-	-	-	-	-	-	-	-	-	-	-	-	-	-	-	-	-	-	-	-	-	-	-	-	-	-	-	-	-	-	-	-	-	-	-	-	-	-	-
PsCam044307	79.3448	chr5LG3	212787359	3		-	-	-	-	-	-	-	-	-	-	-	-	-	-	-	-	-	-	-	-	-	-	-	-	-	-	-	-	-	-	-	-	-	-	-	-	-	-	-	-	-	-	-	-
PsCam035645	79.4672	chr5LG3	212946941	3		-	-	-	-	-	-	-	-	-	-	-	-	-	-	-	-	-	-	-	-	-	-	-	-	-	-	-	-	-	-	-	-	-	-	-	-	-	-	-	-	-	-	-	-
PsCam001604	79.4672	chr5LG3	214043837	3		-	-	-	-	-	-	-	-	-	-	-	-	-	-	-	-	-	-	-	-	-	-	-	-	-	-	-	-	-	-	-	-	-	-	-	-	-	-	-	-	-	-	-	-
PsCam056393	79.5896	chr5LG3	214223880	3		-	-	-	-	-	-	-	-	-	-	-	-	-	-	-	-	-	-	-	-	-	-	-	-	-	-	-	-	-	-	-	-	-	-	-	-	-	-	-	-	-	-	-	-
PsCam055871	80.0834	chr5LG3	217062252	3		-	-	-	-	-	-	-	-	-	-	-	-	-	-	-	-	-	-	-	-	-	-	-	-	-	-	-	-	-	-	-	-	-	-	-	-	-	-	-	-	-	-	-	-
PsCam044545	85.9895	chr5LG3	233344013	3		-	-	-	-	-	-	-	-	-	-	-	-	-	-	-	-	-	-	-	-	-	-	-	-	-	-	-	-	-	-	-	-	-	-	-	-	-	-	-	-	-	-	-	-
PsCam022049	86.2358	chr5LG3	233525869	3		-	-	-	-	-	-	-	-	-	-	-	-	-	-	-	-	-	-	-	-	-	-	-	-	-	-	-	-	-	-	-	-	-	-	-	-	-	-	-	-	-	-	-	-
PsCam050359	86.2358	chr5LG3	234082530	3		-	-	-	-	-	-	-	-	-	-	-	-	-	-	-	-	-	-	-	-	-	-	-	-	-	-	-	-	-	-	-	-	-	-	-	-	-	-	-	-	-	-	-	-
PsCam020901	86.4809	chr5LG3	235103580	3		-	-	-	-	-	-	-	-	-	-	-	-	-	-	-	-	-	-	-	-	-	-	-	-	-	-	-	-	-	-	-	-	-	-	-	-	-	-	-	-	-	-	-	-
PsCam042013	86.4809	chr5LG3	262477874	3		-	-	-	-	-	-	-	-	-	-	-	-	-	-	-	-	-	-	-	-	-	-	-	-	-	-	-	-	-	-	-	-	-	-	-	-	-	-	-	-	-	-	-	-
PsCam052145	86.8508	chr5LG3	234480630	3		-	-	-	-	-	-	-	-	-	-	-	-	-	-	-	-	-	-	-	-	-	-	-	-	-	-	-	-	-	-	-	-	-	-	-	-	-	-	-	-	-	-	-	-
PsCam002236	86.8508	chr5LG3	236385065	3		-	-	-	-	-	-	-	-	-	-	-	-	-	-	-	-	-	-	-	-	-	-	-	-	-	-	-	-	-	-	-	-	-	-	-	-	-	-	-	-	-	-	-	-
PsCam043428	86.9732	chr5LG3	236383468	3		-	-	-	-	-	-	-	-	-	-	-	-	-	-	-	-	-	-	-	-	-	-	-	-	-	-	-	-	-	-	-	-	-	-	-	-	-	-	-	-	-	-	-	-
PsCam004788	86.9732	chr5LG3	236599386	3		-	-	-	-	-	-	-	-	-	-	-	-	-	-	-	-	-	-	-	-	-	-	-	-	-	-	-	-	-	-	-	-	-	-	-	-	-	-	-	-	-	-	-	-
PsCam027134	86.9732	chr5LG3	236593527	3		-	-	-	-	-	-	-	-	-	-	-	-	-	-	-	-	-	-	-	-	-	-	-	-	-	-	-	-	-	-	-	-	-	-	-	-	-	-	-	-	-	-	-	-
PsCam050735	86.9732	chr5LG3	236560139	3		-	-	-	-	-	-	-	-	-	-	-	-	-	-	-	-	-	-	-	-	-	-	-	-	-	-	-	-	-	-	-	-	-	-	-	-	-	-	-	-	-	-	-	-
PsCam046081	87.2183	chr5LG3	238114138	3		-	-	-	-	-	-	-	-	-	-	-	-	-	-	-	-	-	-	-	-	-	-	-	-	-	-	-	-	-	-	-	-	-	-	-	-	-	-	-	-	-	-	-	-
PsCam050434	87.2183	chr5LG3	238129450	3		-	-	-	-	-	-	-	-	-	-	-	-	-	-	-	-	-	-	-	-	-	-	-	-	-	-	-	-	-	-	-	-	-	-	-	-	-	-	-	-	-	-	-	-
PsCam042848	88.481	chr5LG3	240605164	3		-	-	-	-	-	-	-	-	-	-	-	-	-	-	-	-	-	-	-	-	-	-	-	-	-	-	-	-	-	-	-	-	-	-	-	-	-	-	-	-	-	-	-	-
PsCam038407	88.9749	chr5LG3	241226089	3		-	-	-	-	-	-	-	-	-	-	-	-	-	-	-	-	-	-	-	-	-	-	-	-	-	-	-	-	-	-	-	-	-	-	-	-	-	-	-	-	-	-	-	-
PsCam012862	88.9749	chr5LG3	241134486	3		-	-	-	-	-	-	-	-	-	-	-	-	-	-	-	-	-	-	-	-	-	-	-	-	-	-	-	-	-	-	-	-	-	-	-	-	-	-	-	-	-	-	-	-
PsCam004601	88.9749	chr5LG3	243319773	3		-	-	-	-	-	-	-	-	-	-	-	-	-	-	-	-	-	-	-	-	-	-	-	-	-	-	-	-	-	-	-	-	-	-	-	-	-	-	-	-	-	-	-	-
PsCam006710	88.9749	chr5LG3	244618977	3		-	-	-	-	-	-	-	-	-	-	-	-	-	-	-	-	-	-	-	-	-	-	-	-	-	-	-	-	-	-	-	-	-	-	-	-	-	-	-	-	-	-	-	-
PsCam044113	88.9749	chr5LG3	245065192	3		-	-	-	-	-	-	-	-	-	-	-	-	-	-	-	-	-	-	-	-	-	-	-	-	-	-	-	-	-	-	-	-	-	-	-	-	-	-	-	-	-	-	-	-
PsCam005759	88.9749	chr5LG3	245354700	3		-	-	-	-	-	-	-	-	-	-	-	-	-	-	-	-	-	-	-	-	-	-	-	-	-	-	-	-	-	-	-	-	-	-	-	-	-	-	-	-	-	-	-	-
PsCam044558	88.9749	chr5LG3	245355995	3		-	-	-	-	-	-	-	-	-	-	-	-	-	-	-	-	-	-	-	-	-	-	-	-	-	-	-	-	-	-	-	-	-	-	-	-	-	-	-	-	-	-	-	-
PsCam000033	88.9749	chr5LG3	241661914	3		-	-	-	-	-	-	-	-	-	-	-	-	-	-	-	-	-	-	-	-	-	-	-	-	-	-	-	-	-	-	-	-	-	-	-	-	-	-	-	-	-	-	-	-
PsCam035655	88.9749	chr5LG3	246032334	3		-	-	-	-	-	-	-	-	-	-	-	-	-	-	-	-	-	-	-	-	-	-	-	-	-	-	-	-	-	-	-	-	-	-	-	-	-	-	-	-	-	-	-	-
PsCam037882	88.9749	chr5LG3	245953612	3		-	-	-	-	-	-	-	-	-	-	-	-	-	-	-	-	-	-	-	-	-	-	-	-	-	-	-	-	-	-	-	-	-	-	-	-	-	-	-	-	-	-	-	-
PsCam048049	89.3448	chr5LG3	247568949	3		-	-	-	-	-	-	-	-	-	-	-	-	-	-	-	-	-	-	-	-	-	-	-	-	-	-	-	-	-	-	-	-	-	-	-	-	-	-	-	-	-	-	-	-
PsCam040536	89.4672	chr5LG3	247187701	3		-	-	-	-	-	-	-	-	-	-	-	-	-	-	-	-	-	-	-	-	-	-	-	-	-	-	-	-	-	-	-	-	-	-	-	-	-	-	-	-	-	-	-	-
PsCam039994	89.4672	chr5LG3	246976867	3		-	-	-	-	-	-	-	-	-	-	-	-	-	-	-	-	-	-	-	-	-	-	-	-	-	-	-	-	-	-	-	-	-	-	-	-	-	-	-	-	-	-	-	-
PsCam004836	89.4672	chr5LG3	248593981	3		-	-	-	-	-	-	-	-	-	-	-	-	-	-	-	-	-	-	-	-	-	-	-	-	-	-	-	-	-	-	-	-	-	-	-	-	-	-	-	-	-	-	-	-
PsCam059502	89.7123	chr5LG3	248390897	3		-	-	-	-	-	-	-	-	-	-	-	-	-	-	-	-	-	-	-	-	-	-	-	-	-	-	-	-	-	-	-	-	-	-	-	-	-	-	-	-	-	-	-	-
PsCam045805	90.4586	chr5LG3	253798290	3		-	-	-	-	-	-	-	-	-	-	-	-	-	-	-	-	-	-	-	-	-	-	-	-	-	-	-	-	-	-	-	-	-	-	-	-	-	-	-	-	-	-	-	-
PsCam052015	90.4586	chr5LG3	251993587	3		-	-	-	-	-	-	-	-	-	-	-	-	-	-	-	-	-	-	-	-	-	-	-	-	-	-	-	-	-	-	-	-	-	-	-	-	-	-	-	-	-	-	-	-
PsCam001249	90.4586	chr5LG3	252398985	3		-	-	-	-	-	-	-	-	-	-	-	-	-	-	-	-	-	-	-	-	-	-	-	-	-	-	-	-	-	-	-	-	-	-	-	-	-	-	-	-	-	-	-	-
PsCam001252	90.4586	chr5LG3	252850750	3		-	-	-	-	-	-	-	-	-	-	-	-	-	-	-	-	-	-	-	-	-	-	-	-	-	-	-	-	-	-	-	-	-	-	-	-	-	-	-	-	-	-	-	-
PsCam037987	90.4586	chr5LG3	254649333	3		-	-	-	-	-	-	-	-	-	-	-	-	-	-	-	-	-	-	-	-	-	-	-	-	-	-	-	-	-	-	-	-	-	-	-	-	-	-	-	-	-	-	-	-
PsCam045102	90.4586	chr5LG3	254641956	3		-	-	-	-	-	-	-	-	-	-	-	-	-	-	-	-	-	-	-	-	-	-	-	-	-	-	-	-	-	-	-	-	-	-	-	-	-	-	-	-	-	-	-	-
PsCam050689	90.9524	chr5LG3	253571974	3		-	-	-	-	-	-	-	-	-	-	-	-	-	-	-	-	-	-	-	-	-	-	-	-	-	-	-	-	-	-	-	-	-	-	-	-	-	-	-	-	-	-	-	-
PsCam027001	91.3214	chr5LG3	254737132	3		-	-	-	-	-	-	-	-	-	-	-	-	-	-	-	-	-	-	-	-	-	-	-	-	-	-	-	-	-	-	-	-	-	-	-	-	-	-	-	-	-	-	-	-
PsCam036364	91.3214	chr5LG3	254731880	3		-	-	-	-	-	-	-	-	-	-	-	-	-	-	-	-	-	-	-	-	-	-	-	-	-	-	-	-	-	-	-	-	-	-	-	-	-	-	-	-	-	-	-	-
PsCam035867	91.3214	chr5LG3	256985519	3		-	-	-	-	-	-	-	-	-	-	-	-	-	-	-	-	-	-	-	-	-	-	-	-	-	-	-	-	-	-	-	-	-	-	-	-	-	-	-	-	-	-	-	-
PsCam026935	91.5683	chr5LG3	256473052	3		-	-	-	-	-	-	-	-	-	-	-	-	-	-	-	-	-	-	-	-	-	-	-	-	-	-	-	-	-	-	-	-	-	-	-	-	-	-	-	-	-	-	-	-
PsCam039602	91.5683	chr5LG3	256460408	3		-	-	-	-	-	-	-	-	-	-	-	-	-	-	-	-	-	-	-	-	-	-	-	-	-	-	-	-	-	-	-	-	-	-	-	-	-	-	-	-	-	-	-	-
PsCam051216	91.5683	chr5LG3	256209539	3		-	-	-	-	-	-	-	-	-	-	-	-	-	-	-	-	-	-	-	-	-	-	-	-	-	-	-	-	-	-	-	-	-	-	-	-	-	-	-	-	-	-	-	-
PsCam023827	91.6904	chr5LG3	256354797	3		-	-	-	-	-	-	-	-	-	-	-	-	-	-	-	-	-	-	-	-	-	-	-	-	-	-	-	-	-	-	-	-	-	-	-	-	-	-	-	-	-	-	-	-
PsCam037776	91.6904	chr5LG3	256772106	3		-	-	-	-	-	-	-	-	-	-	-	-	-	-	-	-	-	-	-	-	-	-	-	-	-	-	-	-	-	-	-	-	-	-	-	-	-	-	-	-	-	-	-	-
PsCam034128	91.6904	chr5LG3	257259876	3		-	-	-	-	-	-	-	-	-	-	-	-	-	-	-	-	-	-	-	-	-	-	-	-	-	-	-	-	-	-	-	-	-	-	-	-	-	-	-	-	-	-	-	-
PsCam043811	91.6904	chr5LG3	257268044	3		-	-	-	-	-	-	-	-	-	-	-	-	-	-	-	-	-	-	-	-	-	-	-	-	-	-	-	-	-	-	-	-	-	-	-	-	-	-	-	-	-	-	-	-
PsCam031171	91.6904	chr5LG3	257799906	3		-	-	-	-	-	-	-	-	-	-	-	-	-	-	-	-	-	-	-	-	-	-	-	-	-	-	-	-	-	-	-	-	-	-	-	-	-	-	-	-	-	-	-	-
PsCam044942	91.6904	chr5LG3	260230091	3		-	-	-	-	-	-	-	-	-	-	-	-	-	-	-	-	-	-	-	-	-	-	-	-	-	-	-	-	-	-	-	-	-	-	-	-	-	-	-	-	-	-	-	-
PsCam037916	92.1842	chr5LG3	258241638	3		-	-	-	-	-	-	-	-	-	-	-	-	-	-	-	-	-	-	-	-	-	-	-	-	-	-	-	-	-	-	-	-	-	-	-	-	-	-	-	-	-	-	-	-
PsCam039558	92.1842	scaffold00140	14113	3		-	-	-	-	-	-	-	-	-	-	-	-	-	-	-	-	-	-	-	-	-	-	-	-	-	-	-	-	-	-	-	-	-	-	-	-	-	-	-	-	-	-	-	-
PsCam001691	92.1842	chr5LG3	261589110	3		-	-	-	-	-	-	-	-	-	-	-	-	-	-	-	-	-	-	-	-	-	-	-	-	-	-	-	-	-	-	-	-	-	-	-	-	-	-	-	-	-	-	-	-
PsCam045656	92.1842	chr5LG3	261597263	3		-	-	-	-	-	-	-	-	-	-	-	-	-	-	-	-	-	-	-	-	-	-	-	-	-	-	-	-	-	-	-	-	-	-	-	-	-	-	-	-	-	-	-	-
PsCam006445	92.1842	chr5LG3	260502625	3		-	-	-	-	-	-	-	-	-	-	-	-	-	-	-	-	-	-	-	-	-	-	-	-	-	-	-	-	-	-	-	-	-	-	-	-	-	-	-	-	-	-	-	-
PsCam048377	92.1842	chr5LG3	261408476	3		-	-	-	-	-	-	-	-	-	-	-	-	-	-	-	-	-	-	-	-	-	-	-	-	-	-	-	-	-	-	-	-	-	-	-	-	-	-	-	-	-	-	-	-
PsCam056504	92.1842	chr5LG3	261985917	3		-	-	-	-	-	-	-	-	-	-	-	-	-	-	-	-	-	-	-	-	-	-	-	-	-	-	-	-	-	-	-	-	-	-	-	-	-	-	-	-	-	-	-	-
PsCam004809	92.3103	chr5LG3	262333448	3		-	-	-	-	-	-	-	-	-	-	-	-	-	-	-	-	-	-	-	-	-	-	-	-	-	-	-	-	-	-	-	-	-	-	-	-	-	-	-	-	-	-	-	-
PsCam055928	92.3103	chr5LG3	262357111	3		-	-	-	-	-	-	-	-	-	-	-	-	-	-	-	-	-	-	-	-	-	-	-	-	-	-	-	-	-	-	-	-	-	-	-	-	-	-	-	-	-	-	-	-
PsCam044385	92.3103	chr5LG3	266290629	3		-	-	-	-	-	-	-	-	-	-	-	-	-	-	-	-	-	-	-	-	-	-	-	-	-	-	-	-	-	-	-	-	-	-	-	-	-	-	-	-	-	-	-	-
PsCam051726	92.3103	chr5LG3	266288417	3		-	-	-	-	-	-	-	-	-	-	-	-	-	-	-	-	-	-	-	-	-	-	-	-	-	-	-	-	-	-	-	-	-	-	-	-	-	-	-	-	-	-	-	-
PsCam038154	92.3103	chr5LG3	265597530	3		-	-	-	-	-	-	-	-	-	-	-	-	-	-	-	-	-	-	-	-	-	-	-	-	-	-	-	-	-	-	-	-	-	-	-	-	-	-	-	-	-	-	-	-
PsCam028041	92.3103	chr5LG3	265603622	3		-	-	-	-	-	-	-	-	-	-	-	-	-	-	-	-	-	-	-	-	-	-	-	-	-	-	-	-	-	-	-	-	-	-	-	-	-	-	-	-	-	-	-	-
PsCam013052	92.3103	chr5LG3	265643521	3		-	-	-	-	-	-	-	-	-	-	-	-	-	-	-	-	-	-	-	-	-	-	-	-	-	-	-	-	-	-	-	-	-	-	-	-	-	-	-	-	-	-	-	-
PsCam005823	92.3103	chr5LG3	268901218	3		E	K	E	K	E	K	K	E	E	K	K	K	K	K	E	E	E	E	K	E	K	K	E	E	K	E	K	K	E	E	E	K	E	K	E	E	E	E	E	K	K	E	E	K
PsCam033845	92.3103	chr5LG3	268538847	3		E	K	E	K	E	K	K	E	E	K	K	K	K	K	E	E	E	E	K	E	K	K	E	E	K	E	K	K	E	E	E	K	E	K	E	E	E	E	E	K	K	E	E	K
PsCam000337	92.3103	chr5LG3	268369746	3		E	K	E	K	E	K	K	E	E	K	K	K	K	K	E	E	E	E	K	E	K	K	E	E	K	E	K	K	E	E	E	K	E	K	E	E	E	E	E	K	K	E	E	K
PsCam039278	92.3103	chr5LG3	268200117	3		E	K	E	K	E	K	K	E	E	K	K	K	K	K	E	E	E	E	K	E	K	K	E	E	K	E	K	K	E	E	E	K	E	K	E	E	E	E	E	K	K	E	E	K
PsCam040217	92.3103	chr5LG3	268109228	3		E	K	E	K	E	K	K	E	E	K	K	K	K	K	E	E	E	E	K	E	K	K	E	E	K	E	K	K	E	E	E	K	E	K	E	E	E	E	E	K	K	E	E	K
PsCam034418	92.3103	chr5LG3	267992781	3		E	K	E	K	E	K	K	E	E	K	K	K	K	K	E	E	E	E	K	E	K	K	E	E	K	E	K	K	E	E	E	K	E	K	E	E	E	E	E	K	K	E	E	K
PsCam043807	92.5573	chr5LG3	272732844	3		K	K	E	K	E	K	K	E	E	K	K	K	K	K	E	E	E	E	K	E	K	K	E	E	K	E	K	K	E	E	E	K	E	K	E	E	E	E	E	K	K	E	E	K
PsCam023651	92.5573	chr5LG3	272976387	3		K	K	E	K	E	K	K	E	E	K	K	K	K	K	E	E	E	E	K	E	K	K	E	E	K	E	K	K	E	E	E	K	E	K	E	E	E	E	E	K	K	E	E	K
PsCam007076	92.5573	chr5LG3	273042863	3		K	K	E	K	E	K	K	E	E	K	K	K	K	K	E	E	E	E	K	E	K	K	E	E	K	E	K	K	E	E	E	K	E	K	E	E	E	E	E	K	K	E	E	K
PsCam034698	92.6779	chr5LG3	271762932	3		E	K	E	K	E	K	K	E	E	K	K	K	K	K	E	E	E	E	K	E	K	K	E	E	K	E	K	K	E	E	E	K	E	K	E	E	E	E	E	K	K	E	E	K
PsCam049413	92.6779	chr5LG3	271716825	3		E	K	E	K	E	K	K	E	E	K	K	K	K	K	E	E	E	E	K	E	K	K	E	E	K	E	K	K	E	E	E	K	E	K	E	E	E	E	E	K	K	E	E	K
PsCam038153	92.6779	chr5LG3	271592835	3		E	K	E	K	E	K	K	E	E	K	K	K	K	K	E	E	E	E	K	E	K	K	E	E	K	E	K	K	E	E	E	K	E	K	E	E	E	E	E	K	K	E	E	K
PsCam020831	92.6779	chr5LG3	271517330	3		E	K	E	K	E	K	K	E	E	K	K	K	K	K	E	E	E	E	K	E	K	K	E	E	K	E	K	K	E	E	E	K	E	K	E	E	E	E	E	K	K	E	E	K
PsCam000511	92.6779	chr5LG3	270474380	3		E	K	E	K	E	K	K	E	E	K	K	K	K	K	E	E	E	E	K	E	K	K	E	E	K	E	K	K	E	E	E	K	E	K	E	E	E	E	E	K	K	E	E	K
PsCam047272	92.6779	chr5LG3	270632198	3		-	-	-	-	-	-	-	-	-	-	-	-	-	-	-	-	-	-	-	-	-	-	-	-	-	-	-	-	-	-	-	-	-	-	-	-	-	-	-	-	-	-	-	-
PsCam012702	92.6779	chr5LG3	275687054	3		-	-	-	-	-	-	-	-	-	-	-	-	-	-	-	-	-	-	-	-	-	-	-	-	-	-	-	-	-	-	-	-	-	-	-	-	-	-	-	-	-	-	-	-
PsCam039182	92.6779	chr5LG3	274492055	3		-	-	-	-	-	-	-	-	-	-	-	-	-	-	-	-	-	-	-	-	-	-	-	-	-	-	-	-	-	-	-	-	-	-	-	-	-	-	-	-	-	-	-	-
PsCam054094	92.6779	chr5LG3	274272647	3		K	K	E	K	E	K	K	E	E	K	K	K	K	K	E	E	E	E	K	E	K	K	E	E	K	E	K	K	E	E	E	K	E	K	E	E	E	E	E	K	K	E	E	K
PsCam035819	92.6779	chr5LG3	275788412	3		K	K	E	K	E	K	K	E	E	K	K	K	K	K	E	E	E	E	K	E	K	K	E	E	K	E	K	K	E	E	E	K	E	K	E	E	E	E	E	K	K	E	E	K
PsCam001844	92.6779	chr5LG3	279833333	3		K	K	E	K	E	K	K	E	E	K	K	K	K	K	E	E	E	E	K	K	K	K	E	E	K	E	K	K	E	E	E	K	E	K	E	E	E	E	E	K	K	E	E	K
PsCam036430	92.6779	chr5LG3	278721060	3		-	-	-	-	-	-	-	-	-	-	-	-	-	-	-	-	-	-	-	-	-	-	-	-	-	-	-	-	-	-	-	-	-	-	-	-	-	-	-	-	-	-	-	-
PsCam034348	92.6779	chr5LG3	287599477	3		K	K	E	K	E	K	K	E	E	K	K	K	K	K	E	E	E	E	K	K	K	K	E	E	K	E	K	K	E	E	E	K	E	K	E	E	E	E	E	K	K	E	E	K
PsCam050622	92.6779	chr5LG3	287619282	3		K	K	E	K	E	K	K	E	E	K	K	K	K	K	E	E	E	E	K	K	K	K	E	E	K	E	K	K	E	E	E	K	E	K	E	E	E	E	E	K	K	E	E	K
PsCam007018	92.9248	chr5LG3	287749494	3		K	K	E	K	E	K	K	E	E	K	K	K	K	K	E	E	E	E	K	K	K	K	E	E	K	K	K	K	E	E	E	K	E	K	E	E	E	E	E	K	K	E	E	K
PsCam004795	92.9248	chr5LG3	287793565	3		K	K	E	K	E	K	K	E	E	K	K	K	K	K	E	E	E	E	K	K	K	K	E	E	K	K	K	K	E	E	E	K	E	K	E	E	E	E	E	K	K	E	E	K
PsCam049324	92.9248	chr5LG3	287824546	3		K	K	E	K	E	K	K	E	E	K	K	K	K	K	E	E	E	E	K	K	K	K	E	E	K	K	K	K	E	E	E	K	E	K	E	E	E	E	E	K	K	E	E	K
PsCam028418	93.1717	chr5LG3	286597170	3		K	K	E	K	E	K	K	E	E	K	K	K	K	K	E	E	E	E	K	K	K	K	E	E	K	K	K	K	E	E	E	K	E	K	E	E	E	E	E	K	K	E	E	K
PsCam026222	93.4186	chr5LG3	288270106	3		K	K	E	K	E	K	K	E	E	K	K	K	K	K	E	E	E	E	K	K	K	K	E	E	K	K	K	K	E	E	E	K	E	K	E	E	E	E	E	K	K	E	E	K
PsCam055659	93.4186	chr5LG3	288274329	3		K	K	E	K	E	K	K	E	E	K	K	K	K	K	E	E	E	E	K	K	K	K	E	E	K	K	K	K	E	E	E	K	E	K	E	E	E	E	E	K	K	E	E	K
PsCam038445	93.4186	chr5LG3	284290325	3		K	K	E	K	E	K	K	E	E	K	K	K	K	K	E	E	E	E	K	K	K	K	E	E	K	K	K	K	E	E	E	K	E	K	E	E	E	E	E	K	K	E	E	K
PsCam057797	93.4186	chr5LG3	283891860	3		K	K	E	K	E	K	K	E	E	K	K	K	K	K	E	E	E	E	K	K	K	K	E	E	K	K	K	K	E	E	E	K	E	K	E	E	E	E	E	K	K	E	E	K
PsCam035416	93.4186	chr5LG3	288451041	3		-	-	-	-	-	-	-	-	-	-	-	-	-	-	-	-	-	-	-	-	-	-	-	-	-	-	-	-	-	-	-	-	-	-	-	-	-	-	-	-	-	-	-	-
PsCam020937	93.6718	chr5LG3	288457432	3		K	K	E	K	E	K	K	E	E	K	K	K	K	K	E	E	E	E	K	K	K	K	E	E	K	K	K	K	E	E	E	K	E	K	E	E	E	E	E	K	K	E	E	K
PsCam040888	93.6718	chr5LG3	288458139	3		-	-	-	-	-	-	-	-	-	-	-	-	-	-	-	-	-	-	-	-	-	-	-	-	-	-	-	-	-	-	-	-	-	-	-	-	-	-	-	-	-	-	-	-
PsCam055887	93.7939	chr5LG3	290018797	3		-	-	-	-	-	-	-	-	-	-	-	-	-	-	-	-	-	-	-	-	-	-	-	-	-	-	-	-	-	-	-	-	-	-	-	-	-	-	-	-	-	-	-	-
PsCam037737	93.7939	chr5LG3	289601189	3		-	-	-	-	-	-	-	-	-	-	-	-	-	-	-	-	-	-	-	-	-	-	-	-	-	-	-	-	-	-	-	-	-	-	-	-	-	-	-	-	-	-	-	-
PsCam029375	93.7939	chr5LG3	291131317	3		-	-	-	-	-	-	-	-	-	-	-	-	-	-	-	-	-	-	-	-	-	-	-	-	-	-	-	-	-	-	-	-	-	-	-	-	-	-	-	-	-	-	-	-
PsCam006697	94.2724	chr5LG3	295489844	3		-	-	-	-	-	-	-	-	-	-	-	-	-	-	-	-	-	-	-	-	-	-	-	-	-	-	-	-	-	-	-	-	-	-	-	-	-	-	-	-	-	-	-	-
PsCam003065	94.2724	chr5LG3	296150248	3		K	K	E	K	E	K	K	E	E	K	K	K	K	K	E	E	E	E	K	K	K	K	E	E	K	K	K	K	E	E	E	K	E	K	E	E	E	E	E	K	K	E	E	K
PsCam042424	94.2724	chr5LG3	296150921	3		K	K	E	K	E	K	K	E	E	K	K	K	K	K	E	E	E	E	K	K	K	K	E	E	K	K	K	K	E	E	E	K	E	K	E	E	E	E	E	K	K	E	E	K
PsCam047505	94.2724	chr5LG3	296163209	3		K	K	E	K	E	K	K	E	E	K	K	K	K	K	E	E	E	E	K	K	K	K	E	E	K	K	K	K	E	E	E	K	E	K	E	E	E	E	E	K	K	E	E	K
PsCam014684	94.2724	chr5LG3	296198987	3		K	K	E	K	E	K	K	E	E	K	K	K	K	K	E	E	E	E	K	K	K	K	E	E	K	K	K	K	E	E	E	K	E	K	E	E	E	E	E	K	K	E	E	K
PsCam004882	94.2724	chr5LG3	295760494	3		K	K	E	K	E	K	K	E	E	K	K	K	K	K	E	E	E	E	K	K	K	K	E	E	K	K	K	K	E	E	E	K	E	K	E	E	E	E	E	K	K	E	E	K
PsCam052298	94.2724	chr5LG3	295775393	3		K	K	E	K	E	K	K	E	E	K	K	K	K	K	E	E	E	E	K	K	K	K	E	E	K	K	K	K	E	E	E	K	E	K	E	E	E	E	E	K	K	E	E	K
PsCam039323	94.5099	chr5LG3	300754752	3		-	-	-	-	-	-	-	-	-	-	-	-	-	-	-	-	-	-	-	-	-	-	-	-	-	-	-	-	-	-	-	-	-	-	-	-	-	-	-	-	-	-	-	-
PsCam050882	94.5099	chr5LG3	300888118	3		-	-	-	-	-	-	-	-	-	-	-	-	-	-	-	-	-	-	-	-	-	-	-	-	-	-	-	-	-	-	-	-	-	-	-	-	-	-	-	-	-	-	-	-
PsCam060107	94.5099	chr5LG3	296456203	3		-	-	-	-	-	-	-	-	-	-	-	-	-	-	-	-	-	-	-	-	-	-	-	-	-	-	-	-	-	-	-	-	-	-	-	-	-	-	-	-	-	-	-	-
PsCam000930	94.5099	chr5LG3	296465899	3		-	-	-	-	-	-	-	-	-	-	-	-	-	-	-	-	-	-	-	-	-	-	-	-	-	-	-	-	-	-	-	-	-	-	-	-	-	-	-	-	-	-	-	-
PsCam021053	94.5099	chr5LG3	296503072	3		-	-	-	-	-	-	-	-	-	-	-	-	-	-	-	-	-	-	-	-	-	-	-	-	-	-	-	-	-	-	-	-	-	-	-	-	-	-	-	-	-	-	-	-
PsCam058065	94.5099	chr5LG3	296506070	3		-	-	-	-	-	-	-	-	-	-	-	-	-	-	-	-	-	-	-	-	-	-	-	-	-	-	-	-	-	-	-	-	-	-	-	-	-	-	-	-	-	-	-	-
PsCam042540	94.5099	chr5LG3	296313318	3		K	K	E	K	E	K	K	E	E	K	K	-	K	K	E	E	E	E	K	K	K	K	E	E	K	K	K	K	E	E	E	K	E	K	E	E	E	E	E	K	K	E	E	K
PsCam051285	94.5099	chr5LG3	296319905	3		K	K	E	K	E	K	K	E	E	K	K	-	K	K	E	E	E	E	K	K	K	K	E	E	K	K	K	K	E	E	E	K	E	K	E	E	E	E	E	K	K	E	E	K
PsCam001199	94.6347	chr5LG3	296825666	3		K	K	E	K	E	K	K	E	E	K	K	-	K	K	E	E	E	E	K	K	K	K	E	E	K	K	K	K	E	E	E	K	E	K	E	E	E	E	E	K	K	E	E	K
PsCam038157	94.7596	chr5LG3	299268493	3		K	K	E	K	E	K	K	E	E	K	K	E	K	K	E	E	E	E	K	K	K	K	E	E	K	K	K	K	E	E	E	K	E	K	E	E	E	E	E	K	K	E	E	K
PsCam050164	94.7596	chr5LG3	301467712	3		K	K	E	K	E	K	K	E	E	K	K	-	K	K	E	E	E	E	K	K	K	K	E	E	K	K	K	K	E	E	E	K	E	K	E	E	E	E	E	K	K	E	E	K
PsCam048046	94.7596	chr5LG3	300498409	3		K	K	E	K	E	K	K	E	E	K	K	-	K	K	E	E	E	E	K	K	K	K	E	E	K	K	K	K	E	E	E	K	E	K	E	E	E	E	E	K	K	E	E	K
PsCam051116	95.5449	chr5LG3	300413566	3		K	K	E	K	E	K	K	E	E	K	K	-	K	K	E	E	E	E	K	K	E	K	E	E	K	K	K	K	E	E	E	K	E	K	E	E	E	E	K	K	K	E	E	K
PsCam050127	95.5449	chr5LG3	301749134	3		K	K	E	K	E	K	K	E	E	K	K	E	K	K	E	E	E	E	K	K	E	K	E	E	K	K	K	K	E	E	E	K	E	K	E	E	E	E	K	K	K	E	E	-
PsCam049707	95.5449	chr5LG3	301757665	3		K	K	E	K	E	K	K	E	E	K	K	-	K	K	E	E	E	E	K	K	E	K	E	E	K	K	K	K	E	E	E	K	E	K	E	E	E	E	K	K	K	E	E	K
PsCam033958	95.5449	chr5LG3	301975923	3		-	-	-	-	-	-	-	-	-	-	-	-	-	-	-	-	-	-	-	-	-	-	-	-	-	-	-	-	-	-	-	-	-	-	-	-	-	-	-	-	-	-	-	-
PsCam044961	95.5449	chr5LG3	302780344	3		K	K	E	K	E	K	K	E	E	K	K	E	K	K	E	E	E	E	K	K	E	K	E	E	K	K	K	K	E	E	E	K	E	K	E	E	E	E	K	K	K	E	E	K
PsCam044948	95.5449	chr5LG3	302790607	3		-	-	-	-	-	-	-	-	-	-	-	-	-	-	-	-	-	-	-	-	-	-	-	-	-	-	-	-	-	-	-	-	-	-	-	-	-	-	-	-	-	-	-	-
PsCam050415	95.5449	chr5LG3	306210313	3		K	K	E	K	E	K	K	E	E	K	K	E	K	K	E	E	E	E	K	K	E	K	E	E	K	K	K	K	E	E	E	K	E	K	E	E	E	E	K	K	K	E	E	K
PsCam002244	95.5449	chr5LG3	300614822	3		-	-	-	-	-	-	-	-	-	-	-	-	-	-	-	-	-	-	-	-	-	-	-	-	-	-	-	-	-	-	-	-	-	-	-	-	-	-	-	-	-	-	-	-
PsCam048308	95.5449	chr5LG3	305556489	3		-	-	-	-	-	-	-	-	-	-	-	-	-	-	-	-	-	-	-	-	-	-	-	-	-	-	-	-	-	-	-	-	-	-	-	-	-	-	-	-	-	-	-	-
PsCam036180	95.5449	chr5LG3	302936982	3		K	K	E	K	E	K	K	E	E	K	K	E	K	K	E	E	E	E	K	K	E	K	E	E	K	K	K	K	K	K	E	K	E	K	E	E	E	E	K	K	K	E	E	K
PsCam026767	95.5449	chr5LG3	301189764	3		K	K	E	K	E	K	K	E	E	K	K	E	K	K	E	E	E	E	K	K	E	K	E	E	K	K	K	K	K	K	E	K	E	K	E	E	E	E	K	K	K	E	E	K
PsCam049298	95.5449	chr5LG3	301403916	3		K	K	E	K	E	K	K	E	E	K	K	E	K	K	E	E	E	E	K	K	E	K	E	E	K	K	K	K	K	K	E	K	E	K	E	E	E	E	K	K	K	E	E	K
PsCam042711	96.0449	chr5LG3	306399331	3		K	K	E	K	E	K	K	E	E	K	K	E	K	K	E	E	E	E	K	K	E	K	E	E	K	K	K	K	K	K	E	K	E	K	E	E	E	E	K	K	K	E	E	K
PsCam052815	96.0449	chr5LG3	307154388	3		K	K	E	K	E	K	K	E	E	K	K	-	K	K	E	E	E	E	K	K	E	K	E	E	K	K	K	K	K	K	E	K	E	K	E	E	E	E	K	K	K	E	E	K
PsCam034713	96.0449	chr5LG3	306661892	3		-	-	-	-	-	-	-	-	-	-	-	-	-	-	-	-	-	-	-	-	-	-	-	-	-	-	-	-	-	-	-	-	-	-	-	-	-	-	-	-	-	-	-	-
PsCam000948	96.0449	chr5LG3	306620528	3		K	K	E	K	E	K	K	E	E	K	K	-	K	K	E	E	E	E	K	K	E	K	E	E	K	K	K	K	K	K	E	K	E	K	E	E	E	E	K	K	K	E	E	K
PsCam000923	96.0449	chr5LG3	306553180	3		K	K	E	K	E	K	K	E	E	K	K	-	K	K	E	E	E	E	K	K	E	K	E	E	K	K	K	K	K	K	E	K	E	K	E	E	E	E	K	K	K	E	E	K
PsCam038995	96.0449	chr5LG3	306539812	3		-	-	-	-	-	-	-	-	-	-	-	-	-	-	-	-	-	-	-	-	-	-	-	-	-	-	-	-	-	-	-	-	-	-	-	-	-	-	-	-	-	-	-	-
PsCam052327	96.0449	chr5LG3	309300193	3		K	K	E	K	E	K	K	E	E	K	K	-	K	K	E	E	E	E	K	K	E	K	E	E	K	K	K	K	K	K	E	K	E	K	E	E	E	E	K	K	K	E	E	K
PsCam049189	96.0449	chr5LG3	308473880	3		K	K	E	K	E	K	K	E	E	K	K	E	K	K	E	E	E	E	K	K	E	K	E	E	K	K	K	K	K	K	E	K	E	K	E	E	E	E	K	K	K	E	E	K
PsCam050934	96.0449	chr5LG3	308319043	3		-	-	-	-	-	-	-	-	-	-	-	-	-	-	-	-	-	-	-	-	-	-	-	-	-	-	-	-	-	-	-	-	-	-	-	-	-	-	-	-	-	-	-	-
PsCam044009	96.0449	chr5LG3	308090040	3		K	K	E	K	E	K	K	E	E	K	K	-	K	K	E	E	E	E	K	K	E	K	E	E	K	K	K	K	K	K	E	K	E	K	E	E	E	E	K	K	K	E	E	K
PsCam005145	96.0449	chr5LG3	308810823	3		K	K	E	K	E	K	K	E	E	K	K	E	K	K	E	E	E	E	K	K	E	K	E	E	K	K	K	K	K	K	E	K	E	K	E	E	E	E	K	K	K	E	E	K
PsCam021032	96.0449	chr5LG3	307849862	3		-	-	-	-	-	-	-	-	-	-	-	-	-	-	-	-	-	-	-	-	-	-	-	-	-	-	-	-	-	-	-	-	-	-	-	-	-	-	-	-	-	-	-	-
PsCam035447	96.0449	chr5LG3	310085803	3		K	K	E	K	E	K	K	E	E	K	K	-	K	K	E	E	E	E	K	K	E	K	E	E	K	K	K	K	K	K	E	K	E	K	E	E	E	E	K	K	K	E	E	K
PsCam022471	96.0449	chr5LG3	310100394	3		K	K	E	K	E	K	K	E	E	K	K	E	K	K	E	E	E	E	K	K	E	K	E	E	K	K	K	K	K	K	E	K	E	K	E	E	E	E	K	K	K	E	E	K
PsCam036523	96.2825	chr5LG3	310116154	3		-	-	-	-	-	-	-	-	-	-	-	-	-	-	-	-	-	-	-	-	-	-	-	-	-	-	-	-	-	-	-	-	-	-	-	-	-	-	-	-	-	-	-	-
PsCam034446	96.2825	chr5LG3	310118850	3		K	K	E	K	E	K	K	E	E	K	K	E	K	K	E	E	E	E	K	K	E	K	E	E	K	K	K	K	K	K	E	K	E	K	E	E	E	E	K	K	K	E	E	K
PsCam029255	96.2825	chr5LG3	310382522	3		K	K	E	K	E	K	K	E	E	K	K	-	K	K	E	E	E	E	K	K	E	K	E	E	K	K	K	K	K	K	E	K	E	K	E	E	E	E	K	K	K	E	E	K
PsCam010980	96.2825	chr5LG3	309140478	3		-	-	-	-	-	-	-	-	-	-	-	-	-	-	-	-	-	-	-	-	-	-	-	-	-	-	-	-	-	-	-	-	-	-	-	-	-	-	-	-	-	-	-	-
PsCam021929	96.2825	chr5LG3	309602434	3		K	K	E	K	E	K	K	E	E	K	E	-	K	K	E	E	E	E	K	K	E	K	E	E	K	K	K	K	K	K	E	K	E	K	E	E	E	E	K	K	K	E	E	K
PsCam008710	96.2825	chr5LG3	310871156	3		K	K	E	K	E	K	K	E	E	K	E	-	K	K	E	E	E	E	K	K	E	K	E	E	K	K	K	K	K	K	E	K	E	K	E	E	E	E	K	K	K	E	E	K
PsCam011813	96.2825	chr5LG3	310529024	3		K	K	E	K	E	K	K	E	E	K	E	E	K	K	E	E	E	E	K	K	E	K	E	E	K	K	K	K	K	K	E	K	E	K	E	E	E	E	K	K	K	E	E	K
PsCam000156	96.2825	chr5LG3	310923899	3		K	K	E	K	E	K	K	E	E	K	E	-	K	K	E	E	E	E	K	K	E	K	E	E	K	K	K	K	K	K	E	K	E	K	E	E	E	E	K	K	K	E	E	K
PsCam042639	96.2825	chr5LG3	310928450	3		K	K	E	K	E	K	K	E	E	K	E	-	K	K	E	E	E	E	K	K	E	K	E	E	K	K	K	K	K	K	E	K	E	K	E	E	E	E	K	K	K	E	E	K
PsCam035597	96.2825	chr5LG3	314028053	3		K	K	E	K	E	K	K	E	E	K	E	E	K	K	E	E	E	E	K	K	E	K	E	E	K	K	K	K	K	K	E	K	E	K	E	E	E	E	K	K	K	E	E	K
PsCam021558	96.2825	chr5LG3	311689060	3		K	K	E	K	E	K	K	E	E	K	E	-	K	K	E	E	E	E	K	K	E	K	E	E	K	K	K	K	K	K	E	K	E	K	E	E	E	E	K	K	K	E	E	K
PsCam035420	96.2825	chr5LG3	311462543	3		K	K	E	K	E	K	K	E	E	K	E	-	K	K	E	E	E	E	K	K	E	K	E	E	K	K	K	K	K	K	E	K	E	K	E	E	E	E	K	K	K	E	E	K
PsCam049291	96.2825	chr5LG3	311457998	3		-	-	-	-	-	-	-	-	-	-	-	-	-	-	-	-	-	-	-	-	-	-	-	-	-	-	-	-	-	-	-	-	-	-	-	-	-	-	-	-	-	-	-	-
PsCam011143	96.2825	chr5LG3	311243982	3		K	K	E	K	E	K	K	E	E	K	E	-	K	K	E	E	E	E	K	K	E	K	E	E	K	K	K	K	K	K	E	K	E	K	E	E	E	E	K	K	K	E	E	K
PsCam013088	96.2825	chr5LG3	313028669	3		-	-	-	-	-	-	-	-	-	-	-	-	-	-	-	-	-	-	-	-	-	-	-	-	-	-	-	-	-	-	-	-	-	-	-	-	-	-	-	-	-	-	-	-
PsCam055302	96.2825	chr5LG3	313600239	3		K	K	E	K	E	K	K	E	E	K	E	-	K	K	E	E	E	E	K	K	E	K	E	E	K	K	K	K	K	K	E	K	E	K	E	E	E	E	K	K	K	E	E	K
PsCam059194	96.2825	chr5LG3	313662979	3		K	K	E	K	E	K	K	E	E	K	E	E	K	K	E	E	E	E	K	K	E	K	E	E	K	K	K	K	K	K	E	K	E	K	E	E	E	E	K	K	K	E	E	K
PsCam057552	96.2825	chr5LG3	313441798	3		-	-	-	-	-	-	-	-	-	-	-	-	-	-	-	-	-	-	-	-	-	-	-	-	-	-	-	-	-	-	-	-	-	-	-	-	-	-	-	-	-	-	-	-
PsCam048243	96.2825	chr5LG3	313368939	3		K	K	E	K	E	K	K	E	E	K	E	-	K	K	E	E	E	E	K	K	E	K	E	E	K	K	K	K	K	K	E	K	E	K	E	E	E	E	K	K	K	E	E	K
PsCam001688	96.2825	chr5LG3	313219604	3		-	-	-	-	-	-	-	-	-	-	-	-	-	-	-	-	-	-	-	-	-	-	-	-	-	-	-	-	-	-	-	-	-	-	-	-	-	-	-	-	-	-	-	-
PsCam049991	96.5356	chr5LG3	314313570	3		K	K	E	K	E	K	K	E	E	K	E	-	K	K	E	E	E	E	K	K	E	K	E	E	K	K	K	K	K	K	E	K	E	K	E	E	E	E	K	K	K	E	E	K
PsCam002184	96.5356	chr5LG3	314469915	3		-	-	-	-	-	-	-	-	-	-	-	-	-	-	-	-	-	-	-	-	-	-	-	-	-	-	-	-	-	-	-	-	-	-	-	-	-	-	-	-	-	-	-	-
PsCam003536	96.5356	chr5LG3	314470478	3		-	-	-	-	-	-	-	-	-	-	-	-	-	-	-	-	-	-	-	-	-	-	-	-	-	-	-	-	-	-	-	-	-	-	-	-	-	-	-	-	-	-	-	-
PsCam033731	96.5356	chr5LG3	314473093	3		-	-	-	-	-	-	-	-	-	-	-	-	-	-	-	-	-	-	-	-	-	-	-	-	-	-	-	-	-	-	-	-	-	-	-	-	-	-	-	-	-	-	-	-
PsCam048367	96.7732	chr5LG3	321583175	3		K	K	E	K	E	K	K	E	E	K	E	E	K	K	E	E	E	E	K	K	E	K	E	E	K	K	K	K	K	K	E	K	E	K	E	E	E	E	K	K	K	E	E	K
PsCam033948	96.7732	chr5LG3	321500034	3		K	K	E	K	E	K	K	E	E	K	E	-	K	K	E	E	E	E	K	K	E	K	E	E	K	K	K	K	K	K	E	K	E	K	E	E	E	E	K	K	K	E	E	K
PsCam037753	96.7732	chr5LG3	321498797	3		K	K	E	K	E	K	K	E	E	K	E	E	K	K	E	E	E	E	K	K	E	K	E	E	K	K	K	K	K	K	E	K	E	K	E	E	E	E	K	K	K	E	E	K
PsCam038829	96.7732	scaffold01327	75369	3		K	K	E	K	E	K	K	E	E	K	E	E	K	K	E	E	E	E	K	K	E	K	E	E	K	K	K	K	K	K	E	K	E	K	E	E	E	E	K	K	K	E	E	K
PsCam058169	96.7732	chr5LG3	323864324	3		K	K	E	K	E	K	K	E	E	K	E	E	K	K	E	E	E	E	K	K	E	K	E	E	K	K	K	K	K	K	E	K	E	K	E	E	E	E	K	K	K	E	E	K
PsCam037345	97.2516	chr5LG3	321699546	3		K	K	E	K	E	K	K	E	E	K	E	E	K	K	E	E	E	E	K	K	E	K	E	E	K	K	K	K	K	K	E	K	E	K	E	E	E	E	K	K	K	E	E	K
PsCam043099	97.2516	chr5LG3	314710599	3		-	-	-	-	-	-	-	-	-	-	-	-	-	-	-	-	-	-	-	-	-	-	-	-	-	-	-	-	-	-	-	-	-	-	-	-	-	-	-	-	-	-	-	-
PsCam021108	97.2516	chr5LG3	317809701	3		-	-	-	-	-	-	-	-	-	-	-	-	-	-	-	-	-	-	-	-	-	-	-	-	-	-	-	-	-	-	-	-	-	-	-	-	-	-	-	-	-	-	-	-
PsCam006862	97.2516	chr5LG3	318205677	3		K	K	E	K	E	K	K	E	E	K	E	E	K	K	E	E	E	E	K	K	E	K	E	E	K	K	K	K	K	K	E	K	E	K	E	E	E	E	K	K	K	E	E	K
PsCam013193	97.2516	chr5LG3	318549233	3		K	K	E	K	E	K	K	E	E	K	E	-	K	K	E	E	E	E	K	K	E	K	E	E	K	K	K	K	K	K	E	K	E	K	E	E	E	E	K	K	K	E	E	K
PsCam013445	97.2516	chr5LG3	319529939	3		K	K	E	K	E	K	K	E	E	K	E	E	K	K	E	E	E	E	K	K	E	K	E	E	K	K	K	K	K	K	E	K	E	K	E	E	E	E	K	K	K	E	E	K
PsCam040452	97.2516	chr5LG3	317103888	3		K	K	E	K	E	K	K	E	E	K	E	-	K	K	E	E	E	E	K	K	E	K	E	E	K	K	K	K	K	K	E	K	E	K	E	E	E	E	K	K	K	E	E	K
PsCam034292	97.2516	chr5LG3	316971619	3		-	-	-	-	-	-	-	-	-	-	-	-	-	-	-	-	-	-	-	-	-	-	-	-	-	-	-	-	-	-	-	-	-	-	-	-	-	-	-	-	-	-	-	-
PsCam043753	97.2516	chr5LG3	319322822	3		K	K	E	K	E	K	K	E	E	K	E	E	K	K	E	E	E	E	K	K	E	K	E	E	K	K	K	K	K	K	E	K	E	K	E	E	E	E	K	K	K	E	E	K
PsCam021132	97.2516	chr5LG3	326407335	3		K	K	E	K	E	K	K	E	E	K	E	-	K	K	E	E	E	E	K	K	E	K	E	E	K	K	K	K	K	K	E	K	E	K	E	E	E	E	K	K	K	E	E	K
PsCam055957	97.2516	chr5LG3	326689099	3		K	K	E	K	E	K	K	E	E	K	E	E	K	K	E	E	E	E	K	K	E	K	E	E	K	K	K	K	K	K	E	K	E	K	E	E	E	E	K	K	K	E	E	K
PsCam049475	97.2516	chr5LG3	326579583	3		K	K	E	K	E	K	K	E	E	K	E	E	K	K	E	E	E	E	K	K	E	K	E	E	K	K	K	K	K	K	E	K	E	K	E	E	E	E	K	K	K	E	E	K
PsCam025502	97.2516	chr5LG3	326552880	3		K	K	E	K	E	K	K	E	E	K	E	E	K	K	E	E	E	E	K	K	E	K	E	E	K	K	K	K	K	K	E	K	E	K	E	E	E	E	K	K	K	E	E	K
PsCam038096	97.4892	chr5LG3	387520014	3		-	-	-	-	-	-	-	-	-	-	-	-	-	-	-	-	-	-	-	-	-	-	-	-	-	-	-	-	-	-	-	-	-	-	-	-	-	-	-	-	-	-	-	-
PsCam046037	97.4892	chr5LG3	330284998	3		-	-	-	-	-	-	-	-	-	-	-	-	-	-	-	-	-	-	-	-	-	-	-	-	-	-	-	-	-	-	-	-	-	-	-	-	-	-	-	-	-	-	-	-
PsCam049098	97.4892	chr5LG3	330139841	3		-	-	-	-	-	-	-	-	-	-	-	-	-	-	-	-	-	-	-	-	-	-	-	-	-	-	-	-	-	-	-	-	-	-	-	-	-	-	-	-	-	-	-	-
PsCam043316	97.4892	chr5LG3	327506879	3		K	K	E	K	E	K	K	E	E	K	E	E	K	K	E	E	E	E	K	K	E	K	E	E	K	K	K	K	K	K	E	K	E	K	E	E	E	E	K	K	K	E	E	K
PsCam030792	97.4892	chr5LG3	327617827	3		K	K	E	K	E	K	K	E	E	K	E	E	K	K	E	E	E	E	K	K	E	K	E	E	K	K	K	K	K	K	E	K	E	K	E	E	E	E	K	K	K	E	E	K
PsCam002988	97.4892	chr5LG3	327628385	3		K	K	E	K	E	K	K	E	E	K	E	E	K	K	E	E	E	E	K	K	E	K	E	E	K	K	K	K	K	K	E	K	E	K	E	E	E	E	K	K	K	E	E	K
PsCam027140	97.9892	chr5LG3	340293353	3		K	K	E	K	E	K	K	E	E	K	E	-	K	K	E	E	E	E	K	K	E	K	E	E	K	K	K	K	K	K	E	K	E	K	E	E	E	E	K	K	K	E	E	K
PsCam023205	97.9892	chr5LG3	388548337	3		K	K	E	K	E	K	K	E	E	K	E	-	K	K	E	E	E	E	K	K	E	K	E	E	K	K	K	K	K	K	E	K	E	K	E	E	E	E	K	K	K	E	E	K
PsCam058598	97.9892	chr5LG3	389489248	3		K	K	E	K	E	K	K	E	E	K	E	-	K	K	E	E	E	E	K	K	E	K	E	E	K	K	K	K	K	K	E	K	E	K	E	E	E	E	K	K	K	E	E	K
PsCam047677	97.9892	chr5LG3	340985215	3		K	K	E	K	E	K	K	E	E	K	E	-	K	K	E	E	E	E	K	K	E	K	E	E	K	K	K	K	K	K	E	K	E	K	E	E	E	E	K	K	K	E	E	K
PsCam045482	97.9892	chr5LG3	342391945	3		K	K	E	K	E	K	K	E	E	K	E	E	K	K	E	E	E	E	K	K	E	K	E	E	K	K	K	K	K	K	E	K	E	K	E	E	E	E	K	K	K	E	E	K
PsCam005931	97.9892	chr5LG3	362867186	3		K	K	E	K	E	K	K	E	E	K	E	E	K	K	E	E	E	E	K	K	E	K	E	E	K	K	K	K	K	K	E	K	E	K	E	E	E	E	K	K	K	E	E	K
PsCam005645	97.9892	chr5LG3	335750558	3		K	K	E	K	E	K	K	E	E	K	E	E	K	K	E	E	E	E	K	K	E	K	E	E	K	K	K	K	K	K	E	K	E	K	E	E	E	E	K	K	K	E	E	K
PsCam034495	97.9892	chr5LG3	393697978	3		-	-	-	-	-	-	-	-	-	-	-	-	-	-	-	-	-	-	-	-	-	-	-	-	-	-	-	-	-	-	-	-	-	-	-	-	-	-	-	-	-	-	-	-
PsCam059216	97.9892	chr5LG3	393700812	3		-	-	-	-	-	-	-	-	-	-	-	-	-	-	-	-	-	-	-	-	-	-	-	-	-	-	-	-	-	-	-	-	-	-	-	-	-	-	-	-	-	-	-	-
PsCam036900	98.114	chr5LG3	408447763	3		-	-	-	-	-	-	-	-	-	-	-	-	-	-	-	-	-	-	-	-	-	-	-	-	-	-	-	-	-	-	-	-	-	-	-	-	-	-	-	-	-	-	-	-
PsCam037984	98.114	chr5LG3	408492358	3		-	-	-	-	-	-	-	-	-	-	-	-	-	-	-	-	-	-	-	-	-	-	-	-	-	-	-	-	-	-	-	-	-	-	-	-	-	-	-	-	-	-	-	-
PsCam006864	98.114	chr5LG3	405028373	3		-	-	-	-	-	-	-	-	-	-	-	-	-	-	-	-	-	-	-	-	-	-	-	-	-	-	-	-	-	-	-	-	-	-	-	-	-	-	-	-	-	-	-	-
PsCam027208	98.114	chr5LG3	364636890	3		K	K	E	K	E	K	K	E	E	K	E	-	K	K	E	E	E	E	K	K	E	K	E	E	K	K	K	K	K	K	E	K	E	K	E	E	E	E	K	K	K	E	E	K
PsCam045442	98.114	chr5LG3	357329179	3		K	K	E	K	E	K	K	E	E	K	E	-	K	K	E	E	E	E	K	K	E	K	E	E	K	K	K	K	K	K	E	K	E	K	E	E	E	E	K	K	K	E	E	K
PsCam005283	98.114	chr5LG3	384512746	3		K	K	E	K	E	K	K	E	E	K	E	E	K	K	E	E	E	E	K	K	E	K	E	E	K	K	K	K	K	K	E	K	E	K	E	E	E	E	K	K	K	E	E	K
PsCam048496	98.114	chr5LG3	390504142	3		K	K	E	K	E	K	K	E	E	K	E	-	K	K	E	E	E	E	K	K	E	K	E	E	K	K	K	K	K	K	E	K	E	K	E	E	E	E	K	K	K	E	E	K
PsCam028423	98.114	chr5LG3	393006940	3		K	K	E	K	E	K	K	E	E	K	E	E	K	K	E	E	E	E	K	K	E	K	E	E	K	K	K	K	K	K	E	K	E	K	E	E	E	E	K	K	K	E	E	K
PsCam012077	98.114	chr5LG3	339079169	3		K	K	E	K	E	K	K	E	E	K	E	-	K	K	E	E	E	E	K	K	E	K	E	E	K	K	K	K	K	K	E	K	E	K	E	E	E	E	K	K	K	E	E	K
PsCam049236	98.114	chr5LG3	414174556	3		K	K	E	K	E	K	K	E	E	K	E	-	K	K	E	E	E	E	K	K	E	K	E	E	K	K	K	K	K	K	E	K	E	K	E	E	E	E	K	K	K	E	E	K
PsCam028054	98.114	chr5LG3	409024269	3		K	K	E	K	E	K	K	E	E	K	E	E	K	K	E	E	E	E	K	K	E	K	E	E	K	K	K	K	K	K	E	K	E	K	E	E	E	E	K	K	K	E	E	K
PsCam025804	98.114	chr5LG3	413623744	3		-	-	-	-	-	-	-	-	-	-	-	-	-	-	-	-	-	-	-	-	-	-	-	-	-	-	-	-	-	-	-	-	-	-	-	-	-	-	-	-	-	-	-	-
PsCam057817	98.114	chr5LG3	411577542	3		-	-	-	-	-	-	-	-	-	-	-	-	-	-	-	-	-	-	-	-	-	-	-	-	-	-	-	-	-	-	-	-	-	-	-	-	-	-	-	-	-	-	-	-
PsCam039882	98.114	chr5LG3	425222265	3		K	K	E	K	E	K	K	E	E	K	E	-	K	K	E	E	E	E	K	K	E	K	E	E	K	K	K	K	K	K	E	K	E	K	E	E	E	E	K	K	K	E	E	K
PsCam013280	98.114	chr5LG3	417662322	3		K	K	E	K	E	K	K	E	E	K	E	-	K	K	E	E	E	E	K	K	E	K	E	E	K	K	K	K	K	K	E	K	E	K	E	E	E	E	K	K	K	E	E	K
PsCam057723	98.114	chr5LG3	412398637	3		K	K	E	K	E	K	K	E	E	K	E	-	K	K	E	E	E	E	K	K	E	K	E	E	K	K	K	K	K	K	E	K	E	K	E	E	E	E	K	K	K	E	E	K
PsCam009574	98.3622	chr5LG3	421830671	3		K	K	E	K	E	K	K	E	E	K	E	E	K	K	E	E	E	E	K	K	E	K	E	E	E	K	K	K	K	K	E	K	E	K	E	E	E	E	K	K	K	E	E	K
PsCam034384	98.3622	chr5LG3	421825102	3		K	K	E	K	E	K	K	E	E	K	E	E	K	K	E	E	E	E	K	K	E	K	E	E	E	K	K	K	K	K	E	K	E	K	E	E	E	E	K	K	K	E	E	K
PsCam048766	98.6103	chr5LG3	423751681	3		K	K	E	K	E	K	K	E	E	K	E	-	K	K	E	E	E	E	K	K	E	K	E	E	E	K	K	K	K	K	E	K	E	K	E	E	E	E	K	K	K	E	E	K
PsCam014127	98.6103	chr5LG3	423779969	3		K	K	E	K	E	K	K	E	E	K	E	-	K	K	E	E	E	E	K	K	E	K	E	E	E	K	K	K	K	K	E	K	E	K	E	E	E	E	K	K	K	E	E	K
PsCam039012	98.7312	chr5LG3	417486286	3		K	K	E	K	E	K	K	E	E	K	E	E	K	K	E	E	E	E	K	K	E	K	E	E	E	K	K	K	K	K	E	K	E	K	E	E	E	E	K	K	K	E	E	K
PsCam047645	98.7312	chr5LG3	417475505	3		K	K	E	K	E	K	K	E	E	K	E	E	K	K	E	E	E	E	K	K	E	K	E	E	E	K	K	K	K	K	E	K	E	K	E	E	E	E	K	K	K	E	E	K
PsCam033612	98.7312	chr5LG3	417422681	3		K	K	E	K	E	K	K	E	E	K	E	E	K	K	E	E	E	E	K	K	E	K	E	E	E	K	K	K	K	K	E	K	E	K	E	E	E	E	K	K	K	E	E	K
PsCam036500	98.7312	chr5LG3	416021066	3		K	K	E	K	E	K	K	E	E	K	E	E	K	K	E	E	E	E	K	K	E	K	E	E	E	K	K	K	K	K	E	K	E	K	E	E	E	E	K	K	K	E	E	K
PsCam050439	98.7312	chr5LG3	415996321	3		K	K	E	K	E	K	K	E	E	K	E	-	K	K	E	E	E	E	K	K	E	K	E	E	E	K	K	K	K	K	E	K	E	K	E	E	E	E	K	K	K	E	E	K
PsCam001032	98.7312	chr5LG3	420490790	3		K	K	E	K	E	K	K	E	E	K	E	E	K	K	E	E	E	E	K	K	E	K	E	E	E	K	K	K	K	K	E	K	E	K	E	E	E	E	K	K	K	E	E	K
PsCam050867	98.7312	chr5LG3	415667259	3		K	K	E	K	E	K	K	E	E	K	E	-	K	K	E	E	E	E	K	K	E	K	E	E	E	K	K	K	K	K	E	K	E	K	E	E	E	E	K	K	K	E	E	K
PsCam055428	98.7312	chr5LG3	414662693	3		-	-	-	-	-	-	-	-	-	-	-	-	-	-	-	-	-	-	-	-	-	-	-	-	-	-	-	-	-	-	-	-	-	-	-	-	-	-	-	-	-	-	-	-
PsCam017554	98.7312	chr5LG3	423977810	3		K	K	E	K	E	K	K	E	E	K	E	-	K	K	E	E	E	E	K	K	E	K	E	E	E	K	K	K	K	K	E	K	E	K	E	E	E	E	K	K	K	E	E	K
PsCam017082	98.7312	chr5LG3	425008822	3		K	K	E	K	E	K	K	E	E	K	E	E	K	K	E	E	E	E	K	K	E	K	E	E	E	K	K	K	K	K	E	K	E	K	E	E	E	E	K	K	K	E	E	K
PsCam042399	98.7312	chr5LG3	426850850	3		K	K	E	K	E	K	K	E	E	K	E	-	K	K	E	E	E	E	K	K	E	K	E	E	E	K	K	K	K	K	E	K	E	K	E	E	E	E	K	K	K	E	E	K
PsCam036182	99.0975	chr5LG3	427912202	3		K	K	E	K	E	K	K	E	E	K	E	-	K	K	E	E	E	E	K	K	E	K	E	E	E	K	K	K	K	K	E	K	E	K	E	E	E	E	K	K	K	E	E	K
PsCam028536	99.2187	chr5LG3	431424189	3		K	K	E	K	E	K	K	E	E	K	E	-	K	K	E	E	E	E	K	K	E	K	E	E	E	K	K	K	K	K	E	K	E	K	E	E	E	E	K	K	K	E	E	K
PsCam024849	99.2187	chr5LG3	431059032	3		K	K	E	K	E	K	K	E	E	K	E	E	K	K	E	E	E	E	K	K	E	K	E	E	E	K	K	K	K	K	E	K	E	K	E	E	E	E	K	K	K	E	E	K
PsCam043081	99.2187	chr5LG3	434717938	3		K	K	E	K	E	K	K	E	E	K	E	E	K	K	E	E	E	E	K	K	E	K	E	E	E	K	K	K	K	K	E	K	E	K	E	E	E	E	K	K	K	E	E	K
PsCam033648	99.2187	chr5LG3	432724493	3		K	K	E	K	E	K	K	E	E	K	E	-	K	K	E	E	E	E	K	K	E	K	E	E	E	K	K	K	K	K	E	K	E	K	E	E	E	E	K	K	K	E	E	K
PsCam038013	99.2187	chr5LG3	436061155	3		K	K	E	K	E	K	K	E	E	K	E	E	K	K	E	E	E	E	K	K	E	K	E	E	E	K	K	K	K	K	E	K	E	K	E	E	E	E	K	K	K	E	E	K
PsCam000021	99.3405	chr5LG3	430249428	3		K	K	E	K	E	K	K	E	E	K	E	E	K	K	E	E	E	E	K	K	E	K	E	E	E	K	K	K	K	K	E	K	E	K	E	E	E	E	K	K	K	E	E	K
PsCam024152	99.3405	chr5LG3	430128012	3		K	K	E	K	E	K	K	E	E	K	E	E	K	K	E	E	E	E	K	K	E	K	E	E	E	K	K	K	K	K	E	K	E	K	E	E	E	E	K	K	K	E	E	K
PsCam035354	99.3405	chr5LG3	427409029	3		K	K	E	K	E	K	K	E	E	K	E	-	K	K	E	E	E	E	K	K	E	K	E	E	E	K	K	K	K	K	E	K	E	K	E	E	E	E	K	K	K	E	E	K
PsCam037208	99.4617	chr5LG3	438488869	3		K	K	E	K	E	K	K	E	E	K	E	-	K	K	E	E	E	E	K	K	E	K	E	E	E	K	K	K	K	K	E	K	E	K	E	E	E	E	K	K	K	E	E	K
PsCam033909	99.4617	chr5LG3	436708731	3		K	K	E	K	E	K	K	E	E	K	E	E	K	K	E	E	E	E	K	K	E	K	E	E	E	K	K	K	K	K	E	K	E	K	E	E	E	E	K	K	K	E	E	K
PsCam012148	99.7051	chr5LG3	441343090	3		K	K	E	K	E	K	K	E	E	K	E	-	K	K	E	E	E	E	K	K	E	K	E	E	E	K	K	K	K	K	E	E	E	K	E	E	E	E	K	K	K	E	E	K
PsCam018334	99.7051	chr5LG3	441383066	3		K	K	E	K	E	K	K	E	E	K	E	-	K	K	E	E	E	E	K	K	E	K	E	E	E	K	K	K	K	K	E	E	E	K	E	E	E	E	K	K	K	E	E	K
PsCam030451	99.9484	chr5LG3	442559287	3		K	K	E	K	E	K	K	E	E	K	E	-	K	K	E	E	E	E	K	K	E	K	E	E	E	K	K	K	K	K	E	E	E	K	E	E	E	E	K	K	K	E	E	K
PsCam052209	99.9484	chr5LG3	442960416	3		K	K	E	K	E	K	K	E	E	K	E	E	K	K	E	E	E	E	K	K	E	K	E	E	E	K	K	K	K	K	E	E	E	K	E	E	E	E	K	K	K	E	E	K
PsCam000264	100.192	chr5LG3	442802880	3		K	K	E	K	E	K	K	E	E	K	E	E	K	K	E	E	E	E	K	K	E	K	E	E	E	K	K	K	K	K	E	E	E	K	E	E	E	E	K	K	K	E	E	K
PsCam047481	100.313	chr5LG3	445676839	3		K	K	E	K	E	K	K	E	E	K	E	-	K	K	E	E	E	E	K	E	E	K	E	E	E	K	K	K	K	K	E	E	E	K	E	E	E	E	K	K	K	E	E	K
PsCam048417	100.434	chr5LG3	447435693	3		K	K	E	K	E	K	K	E	E	K	E	E	K	K	E	E	E	E	K	E	E	K	E	E	E	K	K	K	K	K	E	E	E	K	E	E	E	E	K	K	K	E	E	K
PsCam033325	100.434	chr5LG3	447668467	3		K	K	E	K	E	K	K	E	E	K	E	E	K	K	E	E	E	E	K	E	E	K	E	E	E	K	K	K	K	K	E	E	E	K	E	E	E	E	K	K	K	E	E	K
PsCam006663	100.434	chr5LG3	447873626	3		K	K	E	K	E	K	K	E	E	K	E	-	K	K	E	E	E	E	K	E	E	K	E	E	E	K	K	K	K	K	E	E	E	K	E	E	E	E	K	K	K	E	E	K
PsCam034415	100.555	chr5LG3	446604745	3		K	K	E	K	E	K	K	E	E	K	E	E	K	K	E	E	E	E	K	E	E	K	E	E	E	K	K	K	K	K	E	E	E	K	E	E	E	E	K	K	K	E	E	K
PsCam036672	100.555	chr5LG3	447101788	3		K	K	E	K	E	K	K	E	E	K	E	-	K	K	E	E	E	E	K	E	E	K	E	E	E	K	K	K	K	K	E	E	E	K	E	E	E	E	K	K	K	E	E	K
PsCam042728	100.555	chr5LG3	447065069	3		K	K	E	K	E	K	K	E	E	K	E	E	K	K	E	E	E	E	K	E	E	K	E	E	E	K	K	K	K	K	E	E	E	K	E	E	E	E	K	K	K	E	E	K
PsCam056323	100.555	chr5LG3	448176081	3		K	K	E	K	E	K	K	E	E	K	E	E	K	K	E	E	E	E	K	E	E	K	E	E	E	K	K	K	K	K	E	E	E	K	E	E	E	E	K	K	K	E	E	K
PsCam013954	100.677	chr5LG3	448291368	3		K	K	E	K	E	K	K	E	E	K	E	-	K	K	E	E	E	E	K	E	E	K	E	E	E	K	K	K	K	K	E	E	E	K	E	E	E	E	K	K	K	E	E	K
PsCam016078	100.798	chr5LG3	448777500	3		K	K	E	K	E	K	K	E	E	K	E	-	K	K	E	E	E	E	K	E	E	K	E	E	E	K	K	K	K	K	E	E	E	K	E	E	E	E	K	K	K	E	E	K
PsCam003751	101.041	chr5LG3	449046292	3		K	K	E	K	E	K	K	E	E	K	E	E	K	K	E	E	E	E	K	E	E	K	E	E	E	K	K	K	K	K	E	E	E	K	E	E	E	E	K	K	K	E	E	K
PsCam026279	101.041	chr5LG3	449047064	3		K	K	E	K	E	K	K	E	E	K	E	E	K	K	E	E	E	E	K	E	E	K	E	E	E	K	K	K	K	K	E	E	E	K	E	E	E	E	K	K	K	E	E	K
PsCam034788	101.041	chr5LG3	449075514	3		K	K	E	K	E	K	K	E	E	K	E	-	K	K	E	E	E	E	K	E	E	K	E	E	E	K	K	K	K	K	E	E	E	K	E	E	E	E	K	K	K	E	E	K
PsCam035686	101.041	chr5LG3	449138722	3		K	K	E	K	E	K	K	E	E	K	E	E	K	K	E	E	E	E	K	E	E	K	E	E	E	K	K	K	K	K	E	E	E	K	E	E	E	E	K	K	K	E	E	K
PsCam035840	101.162	chr5LG3	449350683	3		K	K	E	K	E	K	K	E	E	K	E	E	K	K	E	E	E	E	K	E	E	K	E	E	E	K	K	K	K	K	E	E	E	K	E	E	E	E	K	K	K	E	E	K
PsCam044833	101.406	chr5LG3	449665991	3		K	K	E	K	E	K	K	E	E	K	E	E	K	K	E	E	E	E	K	E	E	K	E	E	E	K	K	K	K	K	E	E	E	K	E	E	E	E	K	K	K	E	E	K
PsCam057376	101.406	chr5LG3	449676519	3		K	K	E	K	E	K	K	E	E	K	E	-	K	K	E	E	E	E	K	E	E	K	E	E	E	K	K	K	K	K	E	E	E	K	E	E	E	E	K	K	K	E	E	K
PsCam041872	101.406	chr5LG3	458149414	3		K	K	E	K	E	K	K	E	E	K	E	-	K	K	E	E	E	E	K	E	E	K	E	E	E	K	K	K	K	K	E	E	E	K	E	E	E	E	K	K	K	E	E	K
PsCam033776	101.406	chr5LG3	458151273	3		K	K	E	K	E	K	K	E	E	K	E	E	K	K	E	E	E	E	K	E	E	K	E	E	E	K	K	K	K	K	E	E	E	K	E	E	E	E	K	K	K	E	E	K
PsCam045242	101.406	chr5LG3	458196409	3		-	-	-	-	-	-	-	-	-	-	-	-	-	-	-	-	-	-	-	-	-	-	-	-	-	-	-	-	-	-	-	-	-	-	-	-	-	-	-	-	-	-	-	-
PsCam035502	101.901	chr5LG3	458697551	3		-	-	-	-	-	-	-	-	-	-	-	-	-	-	-	-	-	-	-	-	-	-	-	-	-	-	-	-	-	-	-	-	-	-	-	-	-	-	-	-	-	-	-	-
PsCam023093	101.901	chr5LG3	458701496	3		-	-	-	-	-	-	-	-	-	-	-	-	-	-	-	-	-	-	-	-	-	-	-	-	-	-	-	-	-	-	-	-	-	-	-	-	-	-	-	-	-	-	-	-
[truncated: 2,564 more rows]
[truncated: 577 more columns]

## Sheet: Table S2. Genomic locations 
Accession number	Location					Symbol	near	near	LG	Symbol	encoded protein	Citation	Citation 2
GU580938	scaffold03806:69164..71164	scaffold03806	69164	71164	70164	Nod3			I	Nod3	unknown	Schnabel EL, Kassaw TK, Smith LS, Marsh JF, Oldroyd GE, Long SL, and Frugoli JA (2011) Plant Physiology 157: 328–340
AJ493064	chr2LG1:739806..741806	chr2LG1	739806	741806	740806	Sym35			I	Sym35	Nitrogen netabolism regulator	Borisov AY, Madsen LH, Tsyganov VE, Umehara Y, Voroshilova VA, Batagov AO, Sandal N, Mortensen A, Schauser L, Ellis N, Tikhonovich IA and Stougaard J (2003) Plant Physiology 131: 1009–1017
EU564087	chr2LG1:26065473..26067473	chr2LG1	26065473	26067473	26066473	Sym2			I	Sym2	LysM Receptor Kinase	Zhukov V, Radutoiu S, Madsen LH, Rychagova T, Ovchinnikova E, Borisov A, Tikhonovich I and Jens Stougaard J (2008) MPMI 21: 1600–1608
EU564102	chr2LG1:26079924..26081924	chr2LG1	26079924	26081924	26080924	Sym37			I	Sym37	LysM Receptor Kinase	Zhukov V, Radutoiu S, Madsen LH, Rychagova T, Ovchinnikova E, Borisov A, Tikhonovich I and Jens Stougaard J (2008) MPMI 21: 1600–1608
AJ276591	chr2LG1:29152707..29143148	chr2LG1	29152707	29143148	2.91479e+07	Lip1			I	Lip1	cop1
AJ418375, AF491997	chr2LG1:347677869..347679869	chr2LG1	347677869	347679869	347678869	Sym19			I	Sym19	Receptor kinase	Endre G, Kereszt A, Kevei Z, Mihacea S, Kalo P and Kiss GB (2002) Nature 417: 962-966	Stracke S, Kistner C, Yoshida S, Mulder L, Sato S, Kaneko T, Tabata S, Sandal N, Stougaard J, Szczyglowski K and Parniske M (2002) Nature 417: 959-962
AJ575252	chr2LG1:396191234..396193234	chr2LG1	396191234	396193234	396192234	Sym10			I	Sym10	LysM Receptor Kinase	Madsen EB, Madsen LH, Radutoiu S, Olbryt M, Rakwalska M, Szczyglowski K, Sato S, Kaneko T, Tabata S, Sandal N, Stougaard J. (2003) Nature 425: 637-640
AB303331	chr2LG1:419921070..419923070	chr2LG1	419921070	419923070	419922070	I			I	I	SGR	Sato Y, Morita R, Nishimura M, Yamaguchi H and Kusaba, M (2007) PNAS 104: 14169-14174	Armstead I, Donnison I, Aubry S, Harper J, Hortensteiner S, James C, Mani J, Moffet M, Ougham H, Roberts L, Thomas A, Weeden N, Thomas H and King I (2007) Science 315 : 73-73
X88789	scaffold04284:..2000	scaffold04284	2000		2000	Lam			II	Lam	Granule bound starch synthase	Denyer K, Barber LM, Burton R, Hedley CL, Hylton CM, Johnson S, Jones DA, Marshall J, Tatge H, Tomlinson K and Wang TL. (1995) Plant, Cell and Environment 18: 1019–26.
AY343326	chr6LG2:9932807..9934807	chr6LG2	9932807	9934807	9933807	Lf			II	Lf	CEN-like	Foucher F, Morin J, Courtiade J, Cadioux S, Ellis N, Banfield MJ and Rameau C (2003) Plant Cell 15: 2742-2754
GU132942	chr6LG2:68341835..68343835	chr6LG2	68341835	68343835	68342835	A			II	A	bHLH	Hellens R, Moreau C, Lin-Wang K, Schwinn KE, Thomson SJ, Fiers MWEJ, Frew TJ, Murray SR, Hofer JMI, Jacobs JME, Davies KM, Allan AC, Bendahmane A, Coyne CJ, Timmerman-Vaughan GM and Ellis THN (2010) PLoS ONE 10: e13230
AY508974	chr6LG2:176960887..176961597	chr6LG2	176960887	176961597		PsCRY2B			II	PsCRY2B		Hecht V., Foucher F., Macknight R., Vardy M.E., Ellis N., Rameau C. and Weller J.L. (2005) Plant Physiology 127: 1420-1434
AY688953	chr6LG2:303810258..303812258	chr6LG2	303810258	303812258	303811258	PhyA			II	PhyA	PhyA	Weller JL, Batge SL, Smith JJ, Kerckhoffs LHJ, Sineshchekov VA, Murfet IC and Reid JB (2004) Plant Physiology 135: 2186-2195
EF185297	chr6LG2:383158715..383160715	chr6LG2	383158715	383160715	383159715	Late1			II	Late1	Clock regulated	Hecht V, Knowles CL, Vander Schoor JK, Liew Lc, Jones SE, Lambert MJM and James L. Weller JL (2007) Plant Physiology 144: 648–661
AJ250770	chr6LG2:402046931..402048931	chr6LG2	402046931	402048931	402047931	Rug3			II	Rug3	PGMP	Harrison CJ, Mould RM, Leech MJ, Johnson SA, Turner L, Schreck SL, Baird KM, Jack PL, Rawsthorne S, Hedley CL, and Wang TL (2000) Plant Physiology 122: 1187–1192
MG515010	chr6LG2:406309936..406309726	chr6LG2	406309936	406309726		Ele			II	Ele1	TIFY domain	Li X, Liu W, Zhuang L, Zhu Y, Wang F, Chen T, Yang J, Ambrose M, Hu Z, Weller JL, Luo D (2019) J. Exp. Bot. 70: Pages 179–191
EU574915	chr6LG2:409712126..409714126	chr6LG2	409712126	409714126	409713126	K			II	K	Cycloidea like	Wang Z, Luo Y, Li X, Wang L, Xu S, Yang J, Weng L, Sato S,Tabata S, Ambrose M, Rameau_x0001_C, Feng X, Hu X and Luo D (2008) PNAS 105: 10414–10419
JQ653163	scaffold02795:97829..99829	scaffold02795	97829	99829	98829	Apu			III	Apu	LOB domain	Chen J., Moreau C., Liu Y., Kawaguchi M., Hofer J., Ellis N. and Chen R (2012) PNAS 109: 11723 - 11728
GU596478	super-scaffold6620:104501..103587	super-scaffold6620	104501	103587	104044	B			III	B	F3'5'H	Moreau C, Ambrose MJ, Turner L, Hill L, Ellis TH and Hofer JM.(2012) Plant Physiology 159: 759-768
X96766	chr5LG3:8729115..8731115	chr5LG3	8729115	8731115	8730115	Rb			III	Rb	ADPG pyrophorylase	Hylton C and Smith AM (1992) Plant Physiol 99: 1626-1634
JN983407, JN983406	chr5LG3:68266782..68268782	chr5LG3	68266782	68268782	68267782	Hr			III	Hr	Clock related	Weller,J.L., Liew,L.C., Hecht,V.F., Rajandran,V., Laurie,R.E., Ridge,S., Wenden,B., Vander Schoor,J.K., Jaminon,O., Blassiau,C., Dalmais,M., Rameau,C., Bendahmane,A., Macknight,R.C. and Lejeune-Henaut,I. (2012) PNAS 109: 21158-21163
AF010190	chr5LG3:102104463..102106463	chr5LG3	102104463	102106463	102105463	Uni			III	Uni	LFY-like tf	Hofer J, Turner L, Hellens R, Ambrose M, Matthews P, Michael A and Ellis N (1997) Curr. Biol. 7: 581-587
HQ245307	chr5LG3:131020814..131023503	chr5LG3	131020814	131023503	1.31022e+08	A2			III	A2	WD40	Hellens R, Moreau C, Lin-Wang K, Schwinn KE, Thomson SJ, Fiers MWEJ, Frew TJ, Murray SR, Hofer JMI, Jacobs JME, Davies KM, Allan AC, Bendahmane A, Coyne CJ, Timmerman-Vaughan GM and Ellis THN (2010) PLoS ONE 10: e13230
DQ848351	chr5LG3:217063288..217065288	chr5LG3	217063288	217065288	217064288	La			III	La	Della	Weston DE, Elliott RC, Lester DR, Rameau C, Reid JB, Murfet IC and Ross JJ (2008) Plant Physiology 147: 199-205
MF033127	chr5LG3:220938048..220937121	chr5LG3	220938048	220937121		St			III	St	C2H2 Zn Finger TF	Moreau C, Hofer JMI, Eleouet M, Sinjushin A, Ambrose M, Skot K, Blackmore T, Swain M, Hegarty M, Balanza V, Ferrandiz C and Ellis THN (2018) New Phytologist 220: 288-299
AY830926	chr5LG3:230587340..230589340	chr5LG3	230587340	230589340	230588340	Dne			III	Dne	Clock related	Liew LC, Hecht V, Laurie RE, Knowles CL, Vander Schoor JK, Macknight RC and James L. Weller JL (2009) Plant Cell 21: 3198-3211
EU736106	chr5LG3:240429936..240431936	chr5LG3	240429936	240431936	240430936	Sym7			III	Sym7	GRAS transcription regulator	Kalo P, Gleason C, Edwards A, John Marsh J, Mitra RM, Hirsch S, Jakab J, Sims S, Long SR, Rogers J, Kiss GB, Downie A, Oldroyd GED. (2005) Science 308 1786 1789
DQ403160	chr5LG3:307091980..307089681	chr5LG3	307091980	307089681	3.07091e+08	Rms5			III	Rms5	carotenoid cleavage dioxygenase	Johnson X, Brcich T, Dun EA, Goussot M, Haurogne K, Beveridge CA and Rameau C (2006) Plant Physiology 142: 1014–1026
AY340580	chr5LG3:510687253..510686185	chr5LG3	510687253	510686185		PsTFL1b			III	PsTFL1b		Hecht V., Foucher F., Macknight R., Vardy M.E., Ellis N., Rameau C. and Weller J.L. (2005) Plant Physiology 127: 1420-1434
U93210	chr5LG3:567364535..567368783	chr5LG3	567364535	567368783	567366659	Le			III	Le	3B hydroxylase	Lester DR, Ross JJ, Davies PJ and Reid J (1997) Plant Cell 9: 1435-1443	Martin DN, Proebsting WM and Hedden P (1997) PNAS 94: 8907-8911
AY245442	chr5LG3:579084904..579086904	chr5LG3	579084904	579086904	579085904	Lh			III	Lh	P450	Davidson SE, Smith JJ, Helliwell CA, Poole AT and Reid JB (2004) Plant Physiol. 134: 1123-1134
AY805329	chr4LG4:31976701..32005380	chr4LG4	31976701	32005380		PsFCA			IV	PsFCA		Hecht V., Foucher F., Macknight R., Vardy M.E., Ellis N., Rameau C. and Weller J.L. (2005) Plant Physiology 127: 1420-1434
MG515008	chr4LG4:56482438..56483330	chr4LG4	56482438	56483330		Bio			IV	Bio	KIX domain	Li X, Liu W, Zhuang L, Zhu Y, Wang F, Chen T, Yang J, Ambrose M, Hu Z, Weller JL, Luo D (2019) J. Exp. Bot. 70: Pages 179–191
AF461740	chr4LG4:228217486..228219486	chr4LG4	228217486	228219486	228218486	Pim			IV	Pim	AP1-like tf	Taylor SA, Hofer JMI, Murfet IC, Sollinger JD, Singer SR, Knox MR, and Ellis THN (2002) Plant Physiology 129:1150–1159
AJ621916	chr4LG4:279404497..279406497	chr4LG4	279404497	279406497	279405497	Sym9			IV	Sym9	Calcium/calmodulin-dependent protein kinase	Mitra RM, Gleason CA, Edwards A, Hadfield J, Downie JA, Oldroyd GE and Long SR (2004) PNAS 101: 4701–4705.
AY340579	chr3LG5:70205820..70207820	chr3LG5	70205820	70207820	70206820	Det			V	Det	CEN-like	Foucher F, Morin J, Courtiade J, Cadioux S, Ellis N, Banfield MJ and Rameau C (2003) Plant Cell 15: 2742-2754
X80009	chr3LG5:71665258..71667258	chr3LG5	71665258	71667258	71666258	R			V	R	SBEI	Bhattacharyya MK, Smith AM, Ellis THN, Hedley C and Martin C (1990) Cell 60: 115-122
EU938525	chr3LG5:82072243..82074243	chr3LG5	82072243	82074243	82073243	Tl			V	Tl	HDZIP	Hofer J, Turner L, Moreau C, Ambrose M, Isaac P, Butcher S, Weller J, Dupin A, Dalmais M, Le Signor C, Bendahmane A and Ellis N (2009) Plant Cell 21:420-428
JN180864	chr3LG5:160911131..160913131	chr3LG5	160911131	160913131	160912131	Coch			V	Coch	poz	Couzigou J.-M., Zhukov V., Mondy S., el Heba G.A., Cosson V., Ellis T.H.N., Ambrose M., Wen J., Tadege M., Tikhonovich I., Mysore K.S., Putterill J., Hofer J., Borisov A.Y., and Ratet P. (2012) Plant Cell 2012 24: 4498-4510
HQ538822	chr3LG5:186555214..186557214	chr3LG5	186555214	186557214	186556214	Gigas			V	Gigas	FT like	Hecht V, Laurie RE, JVander Schoor JK, Ridge S, Knowles CL, Liew LC, Sussmilch FC, Murfet IC, Macknight RC, and Weller JL (2011) Plant Cell 23: 147–161
AF299140	chr3LG5:271475526..271477526	chr3LG5	271475526	271477526	271476526	Cri			V	Cri	Myb TF	Tattersall AD, Turner L, Knox MR, Ambrose MJ, Ellis THN and Hofer JMI (2005) Plant Cell 17: 1046-1060
JN974185	chr3LG5:429772568..429774568	chr3LG5	429772568	429774568	429773568	Veg1			V	Veg1	MADS TF	Berbel A, Ferrándiz C, Hecht V, Dalmais M, Lund OS, Sussmilch FC. Taylor SA, Bendahmane A, Ellis THN, Beltrán JP, Weller JLand Madueño F (2012) Nature Communications 3: 797 doi:10.1038/ncomms1801
EU574914	chr1LG6:96401328..96403328	chr1LG6	96401328	96403328	96402328	Lst			VI	Lst	Cycloidea like	Wang Z, Luo Y, Li X, Wang L, Xu S, Yang J, Weng L, Sato S,Tabata S, Ambrose M, Rameau_x0001_C, Feng X, Hu X and Luo D (2008) PNAS 105: 10414–10419
X88790	chr1LG6:116408148..116410148	chr1LG6	116408148	116410148	116409148	Rug5	PsCam059118	PsCam003061	VI	Rug5	Starch synthase	Craig J, Lloyd JR, Tomlinson K, Barber L, Edwards A, Wang TL, Martin C, Hedley CL and Smith AM (1998) Plant Cell 10: 413-426
FJ463618	chr1LG6:175513314..175515314	chr1LG6	175513314	175515314	175514314	Er1	PsCam045418	PsCam038174	VI	Er1	Mlo	Humphry M, Reinstadler A, Ivanov S, Bisseling T and Panstruga R (2011) Molecular Plant Pathology 12: 866–878
AY830931	chr1LG6:281436918..281437209	chr1LG6	281436918	281437209		PsFVE			VI	PsFVE		Hecht V., Foucher F., Macknight R., Vardy M.E., Ellis N., Rameau C. and Weller J.L. (2005) Plant Physiology 127: 1420-1434
AF537321	chr1LG6:314777421..314779421	chr1LG6	314777421	314779421	314778421	Nana	PsCam042984		VI	Nana		Davidson SE, Elliott RC, Helliwell CA, Poole AT and Reid JB (2003) Plant Physiol. 131: 335-344
AY423375	chr1LG6:343863094..343865094	chr1LG6	343863094	343865094	343864094	Sbm1			VI	Sbm1	EIF4e	Gao Z, Johansen E, Eyers S, Thomas CL, Ellis THN and Maule AJ (2004) The Plant Journal 40: 376–385
EF447280	chr1LG6:370207553..370206797	chr1LG6	370207553	370206797		Sym8			VI	Sym8	Ion channel	Edwards A, Heckmann AB, Yousafzai F, Duc G and Downie JA. (2007) Mol. Plant Microbe Interact. 20: 1183-1191
AC123898	Chr1LG6:362701508..362702188	chr1LG6	362701508	362702188		ANR1a			VI	ANR1a
JQ291249	chr7LG7:3718307..3717784	chr7LG7	3718307	3717784		Lath			VII	Lath	Wox	Zhuang LL, Ambrose M, Rameau C, Weng L, Yang J, Hu XH. Luo D and Li X. (2012) Mol. Plant 5: 1333-1345
DQ845340	chr7LG7:138288688..138290688	chr7LG7	138288688	138290688	138289688	Cry			VII	Cry	Della	Weston DE, Elliott RC, Lester DR, Rameau C, Reid JB, Murfet IC and Ross JJ (2008) Plant Physiology 147: 199-205
AF004843	chr7LG7:147886326..147888326	chr7LG7	147886326	147888326	147887326	Stp			VII	Stp	UFO-like	Taylor S, Hofer J and Murfet I (2001) Plant Cell 13: 31–46
DQ403159	chr7LG7:230490672..230492672	chr7LG7	230490672	230492672	230491672	Rms4			VII	Rms4	F-box	Johnson X, Brcich T, Dun EA, Goussot M, Haurogne K, Beveridge CA and Rameau C (2006) Plant Physiology 142: 1014–1026
AJ495759	chr7LG7:341180439..341182439	chr7LG7	341180439	341182439	341181439	Sym29			VII	Sym29	Receptor kinase	Krusell L, Madsen LH, Sato S, Aubert G, Genua A, Szczyglowski K, Duc G, Kaneko T, Tabata S, de Bruijn F, Pajuelo E, Sandal N and Stougaard J (2001) Nature 420: 422-426
KJ801796	chr7LG7:420065862..420067862	chr7LG7	420065862	420067862	420066862	Sn			VII	Sn	Myb	Liew LC, Hecht V, Laurie RE, Knowles CL, Vander Schoor JK, Macknight RC and James L. Weller JL (2009) Plant Cell 21: 3198-3211

## Sheet: Table S3. NBS LRR locations
Pseudomolecule	Class	Start	End	Strand
chr1LG6	partial (pseudogene)	25871513	25872189	-
chr1LG6	complete	57152535	57155910	+
chr1LG6	complete	78502690	78505773	-
chr1LG6	complete	78538670	78542747	+
chr1LG6	complete	109035306	109038361	+
chr1LG6	partial (pseudogene)	191770977	191771273	+
chr1LG6	complete	207395071	207399491	+
chr1LG6	complete	231098898	231102481	+
chr1LG6	partial	231231009	231236841	-
chr1LG6	complete	231913787	231918545	+
chr1LG6	partial	233115509	233117628	+
chr1LG6	complete	233128872	233132102	-
chr1LG6	complete	234660251	234663318	-
chr1LG6	partial (pseudogene)	241084840	241087340	-
chr1LG6	complete (pseudogene)	241093205	241096461	-
chr1LG6	complete	241173571	241176825	+
chr1LG6	complete	352147270	352150776	+
chr1LG6	complete	352164060	352169758	+
chr1LG6	complete	352311248	352314656	+
chr2LG1	partial	12176654	12177215	-
chr2LG1	partial	12239290	12249802	+
chr2LG1	complete	12358318	12361641	+
chr2LG1	complete	98877110	98880089	+
chr2LG1	partial (pseudogene)	101077952	101081005	-
chr2LG1	complete	101084065	101086795	-
chr2LG1	complete	101093184	101096333	-
chr2LG1	partial (pseudogene)	101098205	101099425	-
chr2LG1	complete (pseudogene)	101109050	101110967	-
chr2LG1	partial	101125341	101127084	-
chr2LG1	complete	101129840	101133559	-
chr2LG1	complete	101129840	101133559	-
chr2LG1	complete	104672395	104674909	-
chr2LG1	partial	106486799	106487638	+
chr2LG1	complete	182478196	182483715	-
chr2LG1	complete	182478196	182482570	-
chr2LG1	partial (pseudogene)	248161888	248162735	-
chr2LG1	complete	289843940	289846922	+
chr2LG1	complete	291475337	291477929	+
chr2LG1	partial (pseudogene)	292224080	292225791	+
chr2LG1	complete	292235920	292239177	+
chr2LG1	complete	292425596	292428776	-
chr2LG1	complete	292457750	292460878	-
chr2LG1	partial	292482668	292483539	+
chr2LG1	complete	292556670	292559853	-
chr2LG1	complete	292590863	292594052	-
chr2LG1	complete (pseudogene)	292825938	292830007	-
chr2LG1	complete	292825938	292830007	-
chr2LG1	complete	292834506	292837297	-
chr2LG1	complete (pseudogene)	299548556	299549829	+
chr2LG1	partial	329435870	329436719	+
chr2LG1	complete	362861253	362863860	-
chr2LG1	complete	362959903	362962492	+
chr2LG1	complete	363329529	363332055	-
chr2LG1	complete	363708168	363711006	-
chr2LG1	complete	364692429	364695249	+
chr2LG1	complete	389055296	389057802	+
chr2LG1	complete	398389354	398394211	+
chr3LG5	complete	152844767	152847328	-
chr3LG5	complete	152848933	152851369	-
chr3LG5	complete	153969663	153973508	+
chr3LG5	complete (pseudogene)	154013020	154014523	+
chr3LG5	complete	154034374	154036864	+
chr3LG5	complete	210917688	210919797	-
chr3LG5	complete	210920732	210923850	+
chr3LG5	complete	211315846	211318867	+
chr3LG5	complete	245315086	245318921	-
chr3LG5	partial	245340825	245342377	-
chr3LG5	complete	302184416	302186972	-
chr3LG5	complete	316039682	316043141	-
chr3LG5	complete	404378942	404383158	-
chr3LG5	complete	404380738	404382420	+
chr3LG5	complete	408592549	408594754	+
chr3LG5	partial	415344805	415345352	-
chr4LG4	complete	205973275	205976297	-
chr4LG4	partial	219141270	219142912	-
chr4LG4	complete	235199074	235203958	+
chr4LG4	complete	246319401	246322610	-
chr4LG4	complete	246330923	246335325	-
chr4LG4	complete	246490375	246494712	+
chr4LG4	partial (pseudogene)	252201558	252204683	-
chr4LG4	partial	287601474	287602826	+
chr4LG4	complete	308222778	308226785	-
chr4LG4	partial (pseudogene)	357062291	357064377	-
chr4LG4	complete	373799886	373806322	+
chr4LG4	complete	376483043	376486009	+
chr4LG4	complete	377843193	377846061	-
chr4LG4	complete	377865940	377870634	-
chr4LG4	partial (pseudogene)	385157960	385158338	-
chr4LG4	partial (pseudogene)	391616322	391618794	-
chr4LG4	partial	391629822	391630092	+
chr4LG4	complete	417304577	417307857	+
chr4LG4	complete	417313206	417315873	+
chr4LG4	complete	417395062	417399667	+
chr4LG4	complete	417414447	417417255	-
chr4LG4	complete	417422726	417425294	-
chr4LG4	complete	417847997	417851137	+
chr4LG4	complete (pseudogene)	417861149	417863704	+
chr4LG4	complete	417935091	417938232	+
chr4LG4	complete (pseudogene)	417948490	417950899	+
chr4LG4	complete (pseudogene)	417956765	417960505	+
chr4LG4	complete	417956765	417960505	+
chr4LG4	partial (pseudogene)	417974923	417976583	+
chr4LG4	complete	418089700	418093117	+
chr4LG4	complete	418137391	418139858	-
chr4LG4	complete	418160714	418164933	+
chr4LG4	complete	418173723	418176297	-
chr4LG4	partial	418183642	418186673	+
chr4LG4	complete	418451323	418453876	-
chr4LG4	complete	418923701	418926804	-
chr4LG4	complete	422044395	422047455	-
chr5LG3	complete	99768714	99771108	+
chr5LG3	partial	122011770	122018857	+
chr5LG3	complete	140016480	140019587	-
chr5LG3	complete	191691716	191694364	+
chr5LG3	complete	192833034	192840540	-
chr5LG3	partial	199757837	199759841	+
chr5LG3	complete	199762763	199765730	+
chr5LG3	complete	199803096	199806020	-
chr5LG3	partial	270640352	270641300	-
chr5LG3	complete	270661434	270665676	+
chr5LG3	partial	270836448	270839427	+
chr5LG3	complete	270846180	270850622	-
chr5LG3	partial	270853034	270853310	-
chr5LG3	partial	270864910	270866365	+
chr5LG3	complete	271478826	271481725	-
chr5LG3	complete	283711151	283716829	-
chr5LG3	complete	284724123	284729642	-
chr5LG3	complete	306780618	306783012	+
chr5LG3	complete	310527048	310529655	+
chr5LG3	complete	311064874	311067412	-
chr5LG3	complete	311086434	311091422	-
chr5LG3	partial	311106317	311107246	-
chr5LG3	complete	312987095	312994287	+
chr5LG3	complete	313105062	313107399	-
chr5LG3	complete (pseudogene)	313209300	313211565	+
chr5LG3	complete	313218664	313221259	-
chr5LG3	complete	313477058	313479643	+
chr5LG3	complete	313480924	313483510	+
chr5LG3	complete	316968398	316971119	+
chr5LG3	complete	316993650	316996338	+
chr5LG3	partial (pseudogene)	318832438	318833024	+
chr5LG3	partial (pseudogene)	321425034	321452930	+
chr5LG3	partial	321458379	321459095	+
chr5LG3	partial	323544555	323546669	-
chr5LG3	complete (pseudogene)	323629344	323630624	-
chr5LG3	complete	411831713	411837110	-
chr5LG3	complete	411884523	411886013	-
chr5LG3	partial	411911186	411913666	-
chr5LG3	complete	411946132	411960096	-
chr5LG3	complete	416695797	416698614	+
chr5LG3	complete (pseudogene)	427160055	427163713	+
chr5LG3	complete	427238561	427244441	+
chr5LG3	complete	427409398	427412668	+
chr5LG3	complete (pseudogene)	430124277	430127867	-
chr5LG3	complete	430249618	430253208	-
chr5LG3	complete	431429666	431433185	+
chr5LG3	partial	435037021	435063038	+
chr5LG3	complete	436578283	436581847	+
chr5LG3	complete	436705857	436708641	+
chr5LG3	complete	442052377	442055819	+
chr5LG3	complete	442101390	442104402	+
chr5LG3	complete	443929016	443932013	+
chr5LG3	complete	443940989	443946858	-
chr5LG3	partial (pseudogene)	443940989	443942063	-
chr5LG3	complete	443973878	443976903	+
chr5LG3	complete	445452793	445457391	+
chr5LG3	complete	446054133	446056442	+
chr5LG3	complete	447044218	447048006	+
chr5LG3	complete	447059237	447062533	-
chr5LG3	complete	449136617	449139152	-
chr5LG3	complete	449178364	449180962	+
chr5LG3	complete	449214895	449217421	+
chr5LG3	complete	458143729	458146327	+
chr5LG3	complete (pseudogene)	458149452	458152068	+
chr5LG3	partial (pseudogene)	461678255	461681944	-
chr5LG3	complete	462479494	462483103	-
chr5LG3	partial	463897927	463898335	+
chr5LG3	complete	501660819	501675288	+
chr5LG3	complete	501711153	501717709	+
chr5LG3	partial	501845396	501857179	+
chr5LG3	complete	501891834	501908675	+
chr5LG3	complete	536280026	536284077	-
chr5LG3	complete	536422285	536426043	-
chr5LG3	complete	555292554	555297334	-
chr6LG2	complete	2579300	2582563	-
chr6LG2	complete	2596878	2601370	-
chr6LG2	complete	2614046	2617778	-
chr6LG2	complete	4429087	4430828	-
chr6LG2	complete	69360779	69363679	+
chr6LG2	complete	135012499	135014932	+
chr6LG2	complete	174054852	174060049	-
chr6LG2	partial (pseudogene)	224256541	224257312	+
chr6LG2	partial	224397723	224399528	+
chr6LG2	complete	290094351	290098203	+
chr6LG2	complete	342674867	342677846	-
chr6LG2	complete	354285636	354288828	-
chr7LG7	partial	25578868	25579172	-
chr7LG7	complete	46798844	46800184	-
chr7LG7	partial	90012580	90015564	-
chr7LG7	complete	90050741	90077395	-
chr7LG7	complete	155340781	155343277	-
chr7LG7	complete	176352866	176356196	+
chr7LG7	complete	176421967	176424016	+
chr7LG7	complete	201909471	201911464	-
chr7LG7	partial	201913686	201916431	-
chr7LG7	complete	201929334	201932188	-
chr7LG7	partial	202066523	202073099	-
chr7LG7	complete	313659140	313662150	-
chr7LG7	complete	314460214	314463224	+
chr7LG7	complete	318056631	318059598	-
chr7LG7	complete (pseudogene)	331115353	331118001	+
chr7LG7	partial (pseudogene)	331136478	331137438	+
chr7LG7	complete (pseudogene)	331136478	331140199	+
chr7LG7	complete	331160005	331165759	-
chr7LG7	complete	331187064	331189623	+
chr7LG7	partial	339676994	339677294	+
chr7LG7	partial (pseudogene)	449457034	449457375	+
chr7LG7	complete	463194291	463198039	-
chr7LG7	partial (pseudogene)	472334450	472337013	-
chr7LG7	partial	472337347	472338860	-
chr7LG7	complete	472340652	472343039	+
chr7LG7	partial	472506527	472508500	-
chr7LG7	partial	472508811	472510743	-
chr7LG7	complete	479765576	479770253	-
chr7LG7	complete	479781611	479786120	+
scaffold00111	partial	194350	195217	+
scaffold00283	complete	387773	390838	-
scaffold01224	complete	59576	62687	-
scaffold01486	complete	10922	14299	-
scaffold01486	complete	47402	52485	-
scaffold01670	complete	33756	39892	+
scaffold02064	complete	39390	41868	+
scaffold03015	complete	117398	120775	-
scaffold03015	partial	121843	122620	-
scaffold03208	complete	43501	47095	-
scaffold03208	complete	64131	66680	-
scaffold03208	partial	155430	156372	-
scaffold03446	partial (pseudogene)	63279	63996	+
scaffold03979	complete	51598	54561	+
scaffold03979	complete	56385	59055	+
scaffold03979	complete	64877	67689	+
scaffold04060	complete	36121	38854	+
scaffold04589	complete	977	6826	-
scaffold05064	complete (pseudogene)	13	1722	-
scaffold05117	complete	5480	10495	+
scaffold05172	complete	3061	5154	+
scaffold06877	partial	12245	13162	+

## Sheet: Table S4. Seed weights
	RIL	normalised seed weight
1	EKKE-1	-0.530203
2	EKKE-2	1.48565
3	EKKE-3	-1.23818
4	EKKE-4	0.624565
5	EKKE-5	1.00681
6	EKKE-6	0.770176
8	EKKE-8	2.12793
9	EKKE-9	-1.49783
10	EKKE-10	-2.53949
11	EKKE-11	1.2142
12	EKKE-12	0.864793
14	EKKE-14	0.640891
15	EKKE-15	0.822988
17	EKKE-17	0.307905
18	EKKE-18	-0.284308
20	EKKE-20	-1.19677
21	EKKE-21	-1.0461
22	EKKE-22	-0.15124
23	EKKE-23	-0.892108
24	EKKE-24	0.731121
25	EKKE-25	-0.835309
26	EKKE-26	0.91454
27	EKKE-27	-0.33119
28	EKKE-28	-0.118325
29	EKKE-29	0.369313
30	EKKE-30	0.48159
31	EKKE-31	-0.975976
32	EKKE-32	0.0048702
33	EKKE-33	0.314957
34	EKKE-34	0.755851
35	EKKE-35	0.725963
36	EKKE-36	-0.839302
37	EKKE-37	0.508833
38	EKKE-38	0.526146
39	EKKE-39	2.02441
40	EKKE-40	-0.609264
41	EKKE-41	-0.0362341
42	EKKE-42	-0.0910203
43	EKKE-43	0.609277
44	EKKE-44	-0.529008
45	EKKE-45	1.11199
47	EKKE-47	-1.50812
48	EKKE-48	0.660564
49	EKKE-49	-0.310957
50	EKKE-50	0.284891
51	EKKE-51	-1.80927
52	EKKE-52	-1.28865
53	EKKE-53	0.374943
54	EKKE-54	1.05759
56	EKKE-56	1.10966
57	EKKE-57	1.39909
59	EKKE-59	0.629934
60	EKKE-60	-1.30941
61	EKKE-61	0.905644
62	EKKE-62	-0.115914
63	EKKE-63	-0.646891
64	EKKE-64	1.63479
65	EKKE-65	-0.154195
66	EKKE-66	1.34035
67	EKKE-67	0.530406
68	EKKE-68	-0.211444
69	EKKE-69	0.540075
70	EKKE-70	-1.54535
71	EKKE-71	-0.69263
72	EKKE-72	0.703304
73	EKKE-73	1.45776
74	EKKE-74	-0.979885
75	EKKE-75	-0.838432
76	EKKE-76	0.492541
77	EKKE-77	1.3256
78	EKKE-78	-0.655834
79	EKKE-79	0.764666
80	EKKE-80	1.49932
81	EKKE-81	1.00357
82	EKKE-82	1.81866
83	EKKE-83	-0.756298
84	EKKE-84	0.327183
85	EKKE-85	0.17095
86	EKKE-86	0.771465
87	EKKE-87	-0.271626
88	EKKE-88	1.36046
89	EKKE-89	0.284223
90	EKKE-90	0.0967541
91	EKKE-91	0.0267725
92	EKKE-92	-0.223141
94	EKKE-94	-1.40309
95	EKKE-95	0.917796
96	EKKE-96	0.684668
97	EKKE-97	0.805591
98	EKKE-98	-1.73553
99	EKKE-99	-0.984347
100	EKKE-100	0.186066
101	EKKE-101	-0.0659318
102	EKKE-102	-0.245911
103	EKKE-103	0.78903
104	EKKE-104	1.18342
105	EKKE-105	0.289193
106	EKKE-106	-0.369261
107	EKKE-107	-1.27855
108	EKKE-108	-1.46084
109	EKKE-109	-1.28806
110	EKKE-110	-0.971513
111	EKKE-111	-1.48292
112	EKKE-112	0.759934
113	EKKE-113	-0.761985
114	EKKE-114	0.134309
115	EKKE-115	-1.4781
116	EKKE-116	0.0342128
117	EKKE-117	0.763865
118	EKKE-118	-0.876623
119	EKKE-119	-1.19171
120	EKKE-120	-0.0316206
121	EKKE-121	-0.859012
122	EKKE-122	-0.207388
123	EKKE-123	0.234345
124	EKKE-124	0.1543
125	EKKE-125	-0.352832
126	EKKE-126	-1.54871
127	EKKE-127	-0.97294
128	EKKE-128	-0.0869711
129	EKKE-129	-1.35059
130	EKKE-130	1.07569
133	EKKE-133	-0.87279
134	EKKE-134	-1.09005
135	EKKE-135	-0.104244
136	EKKE-136	-0.651515
137	EKKE-137	-0.0154575
138	EKKE-138	-0.463525
139	EKKE-139	-1.19223
140	EKKE-140	-0.708108
141	EKKE-141	-2.18396
142	EKKE-142	-1.06607
143	EKKE-143	-0.816825
144	EKKE-144	0.347906
145	EKKE-145	-0.060328
146	EKKE-146	0.192777
147	EKKE-147	-2.16371
148	EKKE-148	-0.113024
149	EKKE-149	3.13278
150	EKKE-150	-0.357121
151	EKKE-151	-1.50698
152	EKKE-152	-1.62536
153	EKKE-153	1.59428
154	EKKE-154	1.30373
155	EKKE-155	-1.70387
157	EKKE-157	-0.0637702
158	EKKE-158	0.0975178
159	EKKE-159	0.130445
160	EKKE-160	0.199443
161	EKKE-161	1.02502
162	EKKE-162	0.247092
163	EKKE-163	-0.00283723
164	EKKE-164	0.435902
165	EKKE-165	-1.01098
166	EKKE-166	0.427065
167	EKKE-167	-0.604405
169	EKKE-169	-0.63562
170	EKKE-170	-0.917415
171	EKKE-171	1.1156
172	EKKE-172	-0.497672
173	EKKE-173	-0.0387311
174	EKKE-174	0.943657
175	EKKE-175	-0.514597
176	EKKE-176	-0.29011
177	EKKE-177	-1.09705
178	EKKE-178	-1.86517
179	EKKE-179	0.564768
180	EKKE-180	-0.814994
181	EKKE-181	0.3174
182	EKKE-182	0.556701
183	EKKE-183	-1.23241
184	EKKE-184	1.72989
185	EKKE-185	1.20529
186	EKKE-186	0.8634
187	EKKE-187	-0.717871
188	EKKE-188	1.19269
189	EKKE-189	0.485251
190	EKKE-190	-0.924133
191	EKKE-191	-0.116716
192	EKKE-192	-0.270313
193	EKKE-193	2.74437
194	EKKE-194	-0.197242
195	EKKE-195	0.420607
196	EKKE-196	1.72816
197	EKKE-197	0.872128
198	EKKE-198	-0.785148
199	EKKE-199	-1.00161
200	EKKE-200	1.88416
201	EKKE-201	-0.66871
202	EKKE-202	-1.66449
203	EKKE-203	0.483248
204	EKKE-204	1.50805
205	EKKE-205	0.693721
206	EKKE-206	1.33341
207	EKKE-207	-0.50251
208	EKKE-208	0.498312
209	EKKE-209	0.352343
210	EKKE-210	-0.835782
212	EKKE-212	0.341132
213	EKKE-213	-0.443948
216	EKKE-216	0.9249
217	EKKE-217	-0.118119
219	EKKE-219	1.78562
220	EKKE-220	-0.615295
1	BK-1	-1.65464
2	BK-2	-1.39797
3	BK-3
4	BK-4	0.426264
5	BK-5	-0.830322
6	BK-6	-1.33777
7	BK-7	-0.415855
8	BK-8	-1.02992
9	BK-9	-1.49999
10	BK-10	-0.467462
11	BK-11	-1.20052
12	BK-12	-0.9433
13	BK-13	-0.285288
14	BK-14	-1.41005
15	BK-15	0.723739
16	BK-16	-1.14189
17	BK-17	-0.332809
18	BK-18	0.400171
19	BK-19	-0.567694
20	BK-20	-1.46795
21	BK-21	0.662458
22	BK-22	1.54174
23	BK-23	1.6848
24	BK-24	-1.31878
25	BK-25	-0.202435
26	BK-26	1.48186
27	BK-27	1.29317
28	BK-28	-0.852316
29	BK-29	-1.70969
30	BK-30	1.43823
32	BK-32	-1.45627
33	BK-33	-0.468359
34	BK-34	0.065047
35	BK-35	-0.873313
36	BK-36	-0.24911
37	BK-37	-0.852238
38	BK-38	0.73277
39	BK-39	0.668576
40	BK-40	0.65579
41	BK-41	1.49284
42	BK-42	0.0188746
43	BK-43	0.13926
44	BK-44	0.851376
45	BK-45	0.429937
46	BK-46	0.15882
48	BK-48	-1.15756
49	BK-49	-1.70996
50	BK-50	1.17995
51	BK-51	-0.680938
52	BK-52	0.171085
53	BK-53	-1.63083
54	BK-54	0.279737
55	BK-55	0.233426
56	BK-56	0.132173
57	BK-57	-0.729148
58	BK-58	0.742952
59	BK-59	0.975219
60	BK-60	-0.719033
61	BK-61	0.573516
62	BK-62	-0.41483
63	BK-63	-0.842755
64	BK-64	0.539971
65	BK-65	0.210019
66	BK-66	-0.410248
67	BK-67	-1.62014
69	BK-69	-1.21044
70	BK-70	-1.4479
71	BK-71	0.165162
72	BK-72	-0.485459
73	BK-73	-1.56474
74	BK-74	0.793375
75	BK-75	-0.908496
76	BK-76	-0.297619
77	BK-77	-0.217715
78	BK-78	-1.03683
79	BK-79	-1.08785
80	BK-80	-0.116868
81	BK-81	-0.610394
82	BK-82	1.68799
83	BK-83	-0.98448
84	BK-84	-0.831092
85	BK-85	-1.06959
86	BK-86	-1.39702
87	BK-87	-0.312741
88	BK-88	-0.0637344
89	BK-89	1.93998
91	BK-91	-0.548255
92	BK-92	1.03157
93	BK-93	0.310977
94	BK-94	0.432093
95	BK-95	-0.450617
96	BK-96	0.0172875
97	BK-97	-0.828242
98	BK-98	0.561839
99	BK-99	0.971681
100	BK-100	1.00167
101	KB-101	-0.43994
102	KB-102	-0.499265
103	KB-103	-0.674505
104	KB-104	1.00631
105	KB-105	0.0629353
106	KB-106	-0.672165
108	KB-108	-0.115759
109	KB-109	-0.0543467
110	KB-110	-1.06117
111	KB-111	0.984526
112	KB-112	-1.13208
113	KB-113	-1.42072
114	KB-114	0.952422
115	KB-115	-0.265415
116	KB-116	2.18167
117	KB-117	-1.19259
118	KB-118	0.977204
119	KB-119	-1.95416
120	KB-120	0.333833
121	KB-121	-1.02505
122	KB-122	1.05809
123	KB-123	-0.409475
124	KB-124	-0.437999
125	KB-125	0.135854
126	KB-126	1.32877
127	KB-127	1.31331
128	KB-128	0.215871
129	KB-129	0.812308
130	KB-130	1.25625
131	KB-131	1.65655
132	KB-132	-1.74761
133	KB-133	-0.991079
134	KB-134	0.322251
135	KB-135	-0.233425
136	KB-136	0.446438
137	KB-137	0.309577
138	KB-138	1.31266
139	KB-139	-0.264581
140	KB-140	-0.666678
141	KB-141	-1.36711
142	KB-142	0.552124
143	KB-143	0.386884
144	KB-144	-0.987165
145	KB-145	1.99113
146	KB-146	-1.62515
147	KB-147	0.112532
149	KB-149	-0.43752
150	KB-150	0.852566
151	KB-151	0.53551
152	KB-152	-0.478483
153	KB-153	-0.759259
154	KB-154	-0.752019
155	KB-155	-1.28098
156	KB-156	-0.666996
157	KB-157	-0.89493
158	KB-158	1.13271
159	KB-159	1.09833
160	KB-160	0.416103
161	KB-161	1.76261
162	KB-162	-0.590062
163	KB-163	-0.885949
164	KB-164	0.552814
165	KB-165	0.769409
166	KB-166	1.17123
167	KB-167	1.31839
168	KB-168	-0.407327
169	KB-169	0.991269
170	KB-170	1.10845
171	KB-171	1.80752
172	KB-172	-0.680522
174	KB-174	-0.102811
175	KB-175	1.33853
176	KB-176	-0.509355
177	KB-177	-0.847739
178	KB-178	-0.27101
179	KB-179	-0.823351
180	KB-180	0.0167521
181	KB-181	2.22288
182	KB-182	2.16293
183	KB-183	-0.607865
184	KB-184	0.800208
185	KB-185	0.955621
186	KB-186	-0.692226
187	KB-187	2.0952
188	KB-188	-1.1938
189	KB-189	2.06424
190	KB-190	0.441043
191	KB-191	0.189411
192	KB-192	2.17368
193	KB-193	-0.108374
194	KB-194	-0.863788
195	KB-195	0.282693
196	KB-196	-1.1566
197	KB-197	-0.513854
198	KB-198	-0.535271
199	KB-199	0.326454
200	KB-200	0.301786
201	KB-201	1.52572
202	KB-202	-0.331295
203	KB-203	1.32093
204	KB-204	-1.26448
205	KB-205	1.12667
206	KB-206	0.0700094
207	KB-207	-0.27676
208	KB-208	1.38773
209	KB-209	-0.692763
210	KB-210	0.183007
211	BK-211	0.859843
212	BK-212	0.0101272
214	BK-214	1.27933
215	BK-215	1.45049
216	BK-216	0.895973
217	BK-217	-0.598644
218	BK-218	0.543321
219	BK-219	1.04747
220	BK-220	-1.3029
1	BEEB-1	0.626815
2	BEEB-2	-0.0994054
3	BEEB-3	0.669359
4	BEEB-4	0.784419
5	BEEB-5	-0.665777
6	BEEB-6	1.37682
7	BEEB-7	0.668307
8	BEEB-8	0.19009
9	BEEB-9	-0.682128
10	BEEB-10	-0.206367
11	BEEB-11	0.819691
12	BEEB-12	-0.217707
13	BEEB-13	-0.126048
14	BEEB-14	-0.471412
15	BEEB-15	1.26758
16	BEEB-16	1.55547
17	BEEB-17	0.090395
18	BEEB-18	-0.268693
19	BEEB-19	-0.589986
20	BEEB-20	0.437268
21	BEEB-21	0.99429
22	BEEB-22	0.34876
23	BEEB-23	-0.359878
25	BEEB-25	0.524044
26	BEEB-26	0.330351
27	BEEB-27	1.01425
28	BEEB-28	0.167501
29	BEEB-29	1.60359
30	BEEB-30	-1.25436
31	BEEB-31	-1.43219
32	BEEB-32	0.673604
33	BEEB-33	-0.563433
34	BEEB-34	-0.345788
35	BEEB-35	-1.05123
36	BEEB-36	0.0412774
37	BEEB-37	0.992714
38	BEEB-38	-0.984298
39	BEEB-39	0.69428
40	BEEB-40	-2.03941
41	BEEB-41	-0.470606
42	BEEB-42	0.102397
43	BEEB-43	-0.613774
44	BEEB-44	-1.01892
45	BEEB-45	-0.209343
46	BEEB-46	-2.19333
47	BEEB-47	-0.239254
48	BEEB-48	0.0105734
49	BEEB-49	0.89659
51	BEEB-51	-1.18742
52	BEEB-52	2.15705
53	BEEB-53	0.774482
54	BEEB-54	-1.44613
55	BEEB-55	-1.60471
56	BEEB-56	0.402055
57	BEEB-57	-0.902819
58	BEEB-58	-0.108482
59	BEEB-59	-1.69837
60	BEEB-60	-1.35538
61	BEEB-61	0.166889
62	BEEB-62	0.927217
63	BEEB-63	-0.766524
64	BEEB-64	-0.144162
65	BEEB-65	-1.2039
66	BEEB-66	-0.236419
67	BEEB-67	-0.124321
68	BEEB-68	0.869691
69	BEEB-69	-0.530388
70	BEEB-70	0.959542
71	BEEB-71	0.192656
72	BEEB-72	-1.85057
73	BEEB-73	-0.044491
74	BEEB-74	-0.942298
75	BEEB-75	-0.136548
76	BEEB-76	0.1617
77	BEEB-77	0.00506851
78	BEEB-78	0.0129976
79	BEEB-79	0.196888
80	BEEB-80	-0.405308
81	BEEB-81	5.32632
82	BEEB-82	-1.20106
83	BEEB-83	0.785233
85	BEEB-85	-0.204594
86	BEEB-86	1.05246
87	BEEB-87	0.443748
88	BEEB-88	1.04322
89	BEEB-89	1.49114
90	BEEB-90	-0.12323
91	BEEB-91	0.723212
92	BEEB-92	1.04355
93	BEEB-93	-0.580502
95	BEEB-95	1.64427
96	BEEB-96	-0.85174
97	BEEB-97	0.857458
99	BEEB-99	-0.788945
100	BEEB-100	-0.530384
101	BEEB-101	1.60061
102	BEEB-102	-1.36694
103	BEEB-103	2.47452
104	BEEB-104	-1.78525
105	BEEB-105	0.522667
107	BEEB-107	0.527637
108	BEEB-108	-0.917555
111	BEEB-111	0.528394
112	BEEB-112	0.112483
113	BEEB-113	1.21404
114	BEEB-114	-0.242429
115	BEEB-115	-0.693929
116	BEEB-116	0.772557
117	BEEB-117	-0.691909
118	BEEB-118	-0.288885
119	BEEB-119	-1.36505
120	BEEB-120	-0.663056
121	BEEB-121	0.519585
122	BEEB-122	-0.969396
123	BEEB-123	0.439039
124	BEEB-124	1.60709
125	BEEB-125	-0.959219
126	BEEB-126	0.217192
127	BEEB-127	1.18595
128	BEEB-128	-0.668802
129	BEEB-129	0.39892
130	BEEB-130	-0.835334
131	BEEB-131	-0.592397
132	BEEB-132	0.295271
133	BEEB-133	-0.189685
134	BEEB-134	1.32777
135	BEEB-135	-1.39275
136	BEEB-136	-1.72501
137	BEEB-137	-1.33308
138	BEEB-138	-1.69535
139	BEEB-139	0.36422
140	BEEB-140	-0.174553
141	BEEB-141	0.473019
142	BEEB-142	-1.31057
143	BEEB-143	1.1572
144	BEEB-144	0.322432
145	BEEB-145	-0.645971
146	BEEB-146	0.204958
147	BEEB-147	-0.494094
148	BEEB-148	0.933952
149	BEEB-149	-1.24364
150	BEEB-150	0.0341968
151	BEEB-151	-0.672204
152	BEEB-152	-0.989927
153	BEEB-153	-0.914489
154	BEEB-154	-2.14389
155	BEEB-155	0.156884
156	BEEB-156	-0.882126
157	BEEB-157	0.979245
158	BEEB-158	0.842427
159	BEEB-159	-1.17577
161	BEEB-161	0.310926
162	BEEB-162	0.182624
163	BEEB-163	0.774381
165	BEEB-165	-1.47786
168	BEEB-168	-0.0939027
169	BEEB-169	0.120191
170	BEEB-170	-0.39397
171	BEEB-171	0.259243
172	BEEB-172	1.51345
173	BEEB-173	-0.268321
174	BEEB-174	0.481197
175	BEEB-175	1.04978
176	BEEB-176	1.33496
177	BEEB-177	-0.224401
178	BEEB-178	-0.853745
179	BEEB-179	-0.230474
180	BEEB-180	0.746119
181	BEEB-181	-1.19731
182	BEEB-182	0.06408
183	BEEB-183	0.408859
184	BEEB-184	0.364778
185	BEEB-185	1.4691
186	BEEB-186	1.32549
187	BEEB-187	1.5643
188	BEEB-188	-0.0501547
189	BEEB-189	1.00163
190	BEEB-190	0.731983
192	BEEB-192	-0.0799876
193	BEEB-193	-0.382063
194	BEEB-194	1.34154
196	BEEB-196	-3.07589
197	BEEB-197	-0.0076845
198	BEEB-198	-0.800261
199	BEEB-199	0.37353
201	BEEB-201	0.440986
202	BEEB-202	-1.02924
203	BEEB-203	-0.0650703
204	BEEB-204	-0.966009
205	BEEB-205	-0.684456
206	BEEB-206	-0.23478
207	BEEB-207	0.604762
208	BEEB-208	-0.464789
209	BEEB-209	0.3982
210	BEEB-210	1.55478
211	BEEB-211	0.140178
212	BEEB-212	0.173732
213	BEEB-213	1.53753
214	BEEB-214	-1.07399
215	BEEB-215	-0.224568
216	BEEB-216	-0.203245
217	BEEB-217	-0.330459
218	BEEB-218	0.851273
219	BEEB-219	0.18512
220	BEEB-220	-0.126358
